# Supplementary material for: Candidate Gene Identification and Transcriptome Analysis of Tomato male sterile-30 and Functional Marker Development for ms-30 and Its Alleles, ms-33, 7B-1, and stamenless-2
Source: MDPI journal article supplement (doi:10.3390/ijms25063331), 2024-03-15
Supplement: s1 [file s1]

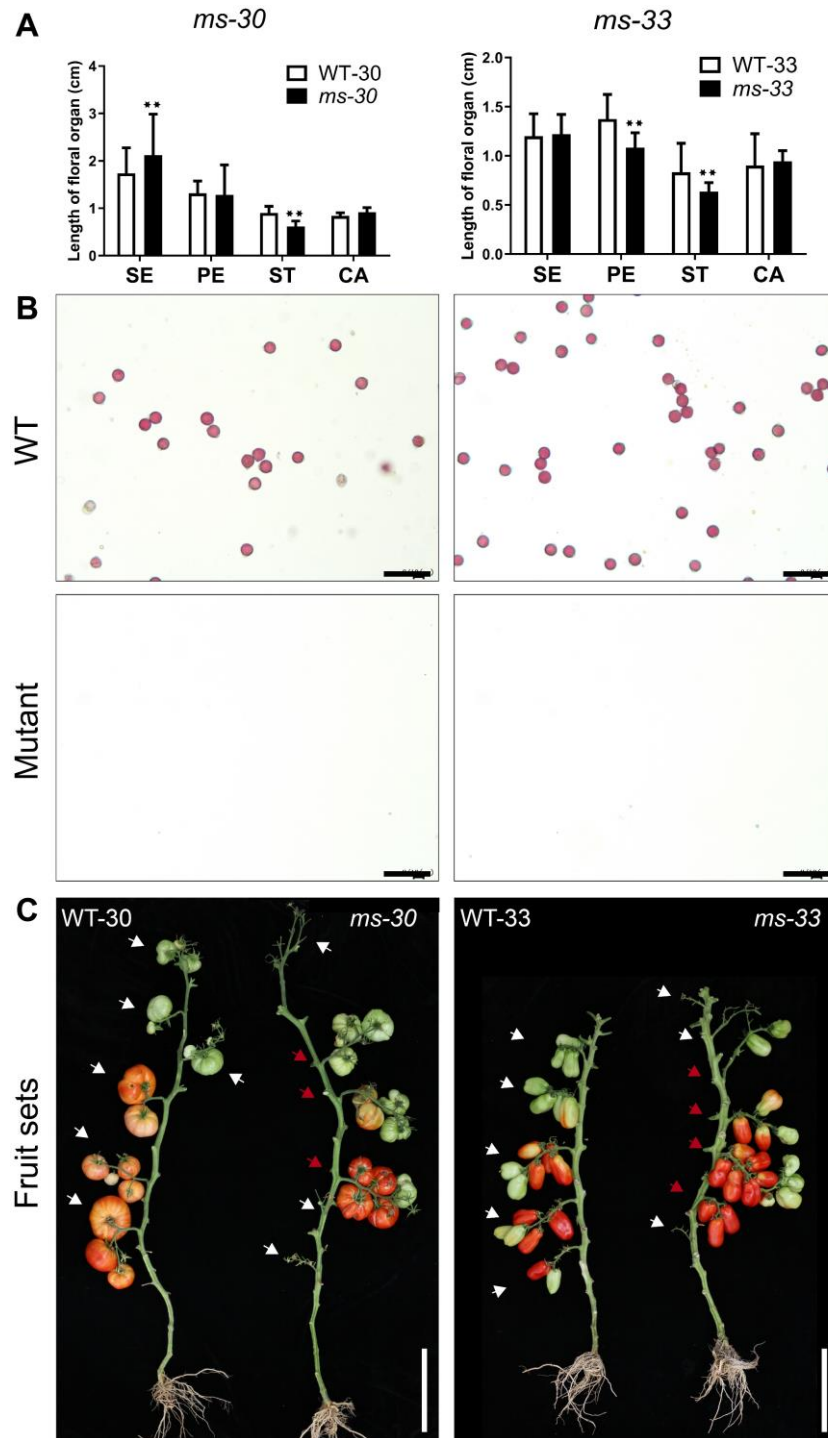

**Figure S1.** Length of floral organs, phenotypes of pollens and fruit sets in *ms-30* and *ms-33*. (A) Length of floral organs at the anthesis. Asterisks indicate a significant difference ( $p < 0.05$ ) between the WT and mutant plants; (B) Analysis of pollen viability by staining the pollens with acetocarmine. Scale bars, 1 mm; (C) Fruit sets of *ms-30* and *ms-33*. White arrows indicate self-cross, and red arrows indicate out-cross. Scale bars, 20 cm.

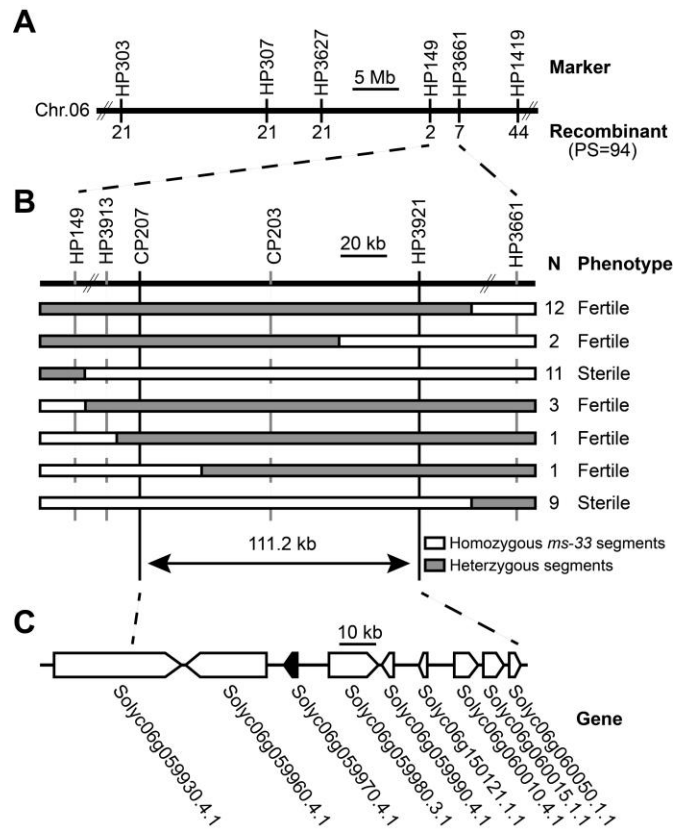

**Figure S2.** Fine-mapping of *ms-33*. (A) Preliminary mapping of *ms-33*. PS indicates population size. (B) Fine mapping of *ms-33*. N indicates the number of recombinants; 39 recombinants selected from 861 plants of the F<sub>2</sub> population. (C) ITAG4.0 annotated genes of *ms-33*. Arrows indicate the direction of transcription, and the solid arrow presents the most likely candidate gene for *ms-33*.

|  |  | MADS Domain |  |    |  |   |  |    |  |   |  |    |  |  |  |  |  |  |  |  |  |  |  |  |  |  |  |  |  |  |  |  |  |  |  |  |  |  |  |  |  |  |  |  |  |  |  |  |  |  |  |  |  |  |  |  |  |  |  |  |  |  |  |  |  |  |  |  |  |  |  |  |  |  |  |  |  |  |  |  |  |  |  |  |  |  |  |  |  |  |  |  |  |  |  |  |  |  |  |  |  |  |  |  |  |  |  |  |  |  |  |  |  |  |  |  |  |  |  |  |  |  |  |  |  |  |  |  |  |  |  |  |  |  |  |  |  |  |  |  |  |  |  |  |  |  |  |  |  |  |  |  |  |  |  |  |  |  |  |  |  |  |  |  |  |  |  |  |  |  |  |  |  |  |  |  |  |  |  |  |  |  |  |  |  |  |  |  |  |  |  |  |  |  |  |  |  |  |  |  |  |  |  |  |  |  |  |  |  |  |  |  |  |  |  |  |  |  |  |  |  |  |  |  |  |  |  |  |  |  |  |  |  |  |  |  |  |  |  |  |  |  |  |  |  |  |  |  |  |  |  |  |  |  |  |  |  |  |  |  |  |  |  |  |  |  |  |  |  |  |  |  |  |  |  |  |  |  |  |  |  |  |  |  |  |  |  |  |  |  |  |  |  |  |  |  |  |  |  |  |  |  |  |  |  |  |  |  |  |  |  |  |  |  |  |  |  |  |  |  |  |  |  |  |  |  |  |  |  |  |  |  |  |  |  |  |  |  |  |  |  |  |  |  |  |  |  |  |  |  |  |  |  |  |  |  |  |  |  |  |  |  |  |  |  |  |  |  |  |  |  |  |  |  |  |  |  |  |  |  |  |  |  |  |  |  |  |  |  |  |  |  |  |  |  |  |  |  |  |  |  |  |  |  |  |  |  |  |  |  |  |  |  |  |  |  |  |  |  |  |  |  |  |  |  |  |  |  |  |  |  |  |  |  |  |  |  |  |  |  |  |  |  |  |  |  |  |  |  |  |  |  |  |  |  |  |  |  |  |  |  |  |  |  |  |  |  |  |  |  |  |  |  |  |  |  |  |  |  |  |  |  |  |  |  |  |  |  |  |  |  |  |  |  |  |  |  |  |  |  |  |  |  |  |  |  |  |  |  |  |  |  |  |  |  |  |  |  |  |  |  |  |  |  |  |  |  |  |  |  |  |  |  |  |  |  |  |  |  |  |  |  |  |  |  |  |  |  |  |  |  |  |  |  |  |  |  |  |  |  |  |  |  |  |  |  |  |  |  |  |  |  |  |  |  |  |  |  |  |  |  |  |  |  |  |  |  |  |  |  |  |  |  |  |  |  |  |  |  |  |  |  |  |  |  |  |  |  |  |  |  |  |  |  |  |  |  |  |  |  |  |  |  |  |  |  |  |  |  |  |  |  |  |  |  |  |  |  |  |  |  |  |  |  |  |  |  |  |  |  |  |  |  |  |  |  |  |  |  |  |  |  |  |  |  |  |  |  |  |  |  |  |  |  |  |  |  |  |  |  |  |  |  |  |  |  |  |  |  |  |  |  |  |  |  |  |  |  |  |  |  |  |  |  |  |  |  |  |  |  |  |  |  |  |  |  |  |  |  |  |  |  |  |  |  |  |  |  |  |  |  |  |  |  |  |  |  |  |  |  |  |  |  |  |  |  |  |  |  |  |  |  |  |  |  |  |  |  |  |  |  |  |  |  |  |  |  |  |  |  |  |  |  |  |  |  |  |  |  |  |  |  |  |  |  |  |  |  |  |  |  |  |  |  |  |  |  |  |  |  |  |  |  |  |  |  |  |  |  |  |  |  |  |  |  |  |  |  |  |  |  |  |  |  |  |  |  |  |  |  |  |  |  |  |  |  |  |  |  |  |  |  |  |  |  |  |  |  |  |  |  |  |  |  |  |  |  |  |  |  |  |  |  |  |  |  |  |  |  |  |  |  |  |  |  |  |  |  |  |  |  |  |  |  |  |  |  |  |  |  |  |  |  |  |  |  |  |  |  |  |  |  |  |  |  |  |  |  |  |  |  |  |  |  |  |  |  |  |  |  |  |  |  |  |  |  |  |  |  |  |  |  |  |  |  |  |  |  |  |  |  |  |  |  |  |  |  |  |  |  |  |  |  |  |  |  |  |  |  |  |  |  |  |  |  |  |  |  |  |  |  |  |  |  |  |  |  |  |  |  |  |  |  |  |  |  |  |  |  |  |  |  |  |  |  |  |  |  |  |  |  |  |  |  |  |  |  |  |  |  |  |  |  |  |  |  |  |  |  |  |  |  |  |  |  |  |  |  |  |  |  |  |  |  |  |  |  |  |  |  |  |  |  |  |  |  |  |  |  |  |  |  |  |  |  |  |  |  |  |  |  |  |  |  |  |  |  |  |  |  |  |  |  |  |  |  |  |  |  |  |  |  |  |  |  |  |  |  |  |  |  |  |  |  |  |  |  |  |  |  |  |  |  |  |  |  |  |  |  |  |  |  |  |  |  |  |  |  |  |  |  |  |  |  |  |  |  |  |  |  |  |  |  |  |  |  |  |  |  |  |  |  |  |  |  |  |  |  |  |  |  |  |  |  |  |  |  |  |  |  |  |
|--|--|-------------|--|----|--|---|--|----|--|---|--|----|--|--|--|--|--|--|--|--|--|--|--|--|--|--|--|--|--|--|--|--|--|--|--|--|--|--|--|--|--|--|--|--|--|--|--|--|--|--|--|--|--|--|--|--|--|--|--|--|--|--|--|--|--|--|--|--|--|--|--|--|--|--|--|--|--|--|--|--|--|--|--|--|--|--|--|--|--|--|--|--|--|--|--|--|--|--|--|--|--|--|--|--|--|--|--|--|--|--|--|--|--|--|--|--|--|--|--|--|--|--|--|--|--|--|--|--|--|--|--|--|--|--|--|--|--|--|--|--|--|--|--|--|--|--|--|--|--|--|--|--|--|--|--|--|--|--|--|--|--|--|--|--|--|--|--|--|--|--|--|--|--|--|--|--|--|--|--|--|--|--|--|--|--|--|--|--|--|--|--|--|--|--|--|--|--|--|--|--|--|--|--|--|--|--|--|--|--|--|--|--|--|--|--|--|--|--|--|--|--|--|--|--|--|--|--|--|--|--|--|--|--|--|--|--|--|--|--|--|--|--|--|--|--|--|--|--|--|--|--|--|--|--|--|--|--|--|--|--|--|--|--|--|--|--|--|--|--|--|--|--|--|--|--|--|--|--|--|--|--|--|--|--|--|--|--|--|--|--|--|--|--|--|--|--|--|--|--|--|--|--|--|--|--|--|--|--|--|--|--|--|--|--|--|--|--|--|--|--|--|--|--|--|--|--|--|--|--|--|--|--|--|--|--|--|--|--|--|--|--|--|--|--|--|--|--|--|--|--|--|--|--|--|--|--|--|--|--|--|--|--|--|--|--|--|--|--|--|--|--|--|--|--|--|--|--|--|--|--|--|--|--|--|--|--|--|--|--|--|--|--|--|--|--|--|--|--|--|--|--|--|--|--|--|--|--|--|--|--|--|--|--|--|--|--|--|--|--|--|--|--|--|--|--|--|--|--|--|--|--|--|--|--|--|--|--|--|--|--|--|--|--|--|--|--|--|--|--|--|--|--|--|--|--|--|--|--|--|--|--|--|--|--|--|--|--|--|--|--|--|--|--|--|--|--|--|--|--|--|--|--|--|--|--|--|--|--|--|--|--|--|--|--|--|--|--|--|--|--|--|--|--|--|--|--|--|--|--|--|--|--|--|--|--|--|--|--|--|--|--|--|--|--|--|--|--|--|--|--|--|--|--|--|--|--|--|--|--|--|--|--|--|--|--|--|--|--|--|--|--|--|--|--|--|--|--|--|--|--|--|--|--|--|--|--|--|--|--|--|--|--|--|--|--|--|--|--|--|--|--|--|--|--|--|--|--|--|--|--|--|--|--|--|--|--|--|--|--|--|--|--|--|--|--|--|--|--|--|--|--|--|--|--|--|--|--|--|--|--|--|--|--|--|--|--|--|--|--|--|--|--|--|--|--|--|--|--|--|--|--|--|--|--|--|--|--|--|--|--|--|--|--|--|--|--|--|--|--|--|--|--|--|--|--|--|--|--|--|--|--|--|--|--|--|--|--|--|--|--|--|--|--|--|--|--|--|--|--|--|--|--|--|--|--|--|--|--|--|--|--|--|--|--|--|--|--|--|--|--|--|--|--|--|--|--|--|--|--|--|--|--|--|--|--|--|--|--|--|--|--|--|--|--|--|--|--|--|--|--|--|--|--|--|--|--|--|--|--|--|--|--|--|--|--|--|--|--|--|--|--|--|--|--|--|--|--|--|--|--|--|--|--|--|--|--|--|--|--|--|--|--|--|--|--|--|--|--|--|--|--|--|--|--|--|--|--|--|--|--|--|--|--|--|--|--|--|--|--|--|--|--|--|--|--|--|--|--|--|--|--|--|--|--|--|--|--|--|--|--|--|--|--|--|--|--|--|--|--|--|--|--|--|--|--|--|--|--|--|--|--|--|--|--|--|--|--|--|--|--|--|--|--|--|--|--|--|--|--|--|--|--|--|--|--|--|--|--|--|--|--|--|--|--|--|--|--|--|--|--|--|--|--|--|--|--|--|--|--|--|--|--|--|--|--|--|--|--|--|--|--|--|--|--|--|--|--|--|--|--|--|--|--|--|--|--|--|--|--|--|--|--|--|--|--|--|--|--|--|--|--|--|--|--|--|--|--|--|--|--|--|--|--|--|--|--|--|--|--|--|--|--|--|--|--|--|--|--|--|--|--|--|--|--|--|--|--|--|--|--|--|--|--|--|--|--|--|--|--|--|--|--|--|--|--|--|--|--|--|--|--|--|--|--|--|--|--|--|--|--|--|--|--|--|--|--|--|--|--|--|--|--|--|--|--|--|--|--|--|--|--|--|--|--|--|--|--|--|--|--|--|--|--|--|--|--|--|--|--|--|--|--|--|--|--|--|--|--|--|--|--|--|--|--|--|--|--|--|--|--|--|--|--|--|--|--|--|--|--|--|--|--|--|--|--|--|--|--|--|--|--|--|--|--|--|--|--|--|--|--|--|--|--|--|--|--|--|--|--|--|--|--|--|--|--|--|--|--|--|--|--|--|--|--|--|--|--|--|--|--|--|--|--|--|--|--|--|--|--|--|--|--|--|--|--|--|--|--|--|--|--|--|--|--|--|--|--|--|--|--|--|
|  |  | *           |  | 20 |  | * |  | 40 |  | * |  | 60 |  |  |  |  |  |  |  |  |  |  |  |  |  |  |  |  |  |  |  |  |  |  |  |  |  |  |  |  |  |  |  |  |  |  |  |  |  |  |  |  |  |  |  |  |  |  |  |  |  |  |  |  |  |  |  |  |  |  |  |  |  |  |  |  |  |  |  |  |  |  |  |  |  |  |  |  |  |  |  |  |  |  |  |  |  |  |  |  |  |  |  |  |  |  |  |  |  |  |  |  |  |  |  |  |  |  |  |  |  |  |  |  |  |  |  |  |  |  |  |  |  |  |  |  |  |  |  |  |  |  |  |  |  |  |  |  |  |  |  |  |  |  |  |  |  |  |  |  |  |  |  |  |  |  |  |  |  |  |  |  |  |  |  |  |  |  |  |  |  |  |  |  |  |  |  |  |  |  |  |  |  |  |  |  |  |  |  |  |  |  |  |  |  |  |  |  |  |  |  |  |  |  |  |  |  |  |  |  |  |  |  |  |  |  |  |  |  |  |  |  |  |  |  |  |  |  |  |  |  |  |  |  |  |  |  |  |  |  |  |  |  |  |  |  |  |  |  |  |  |  |  |  |  |  |  |  |  |  |  |  |  |  |  |  |  |  |  |  |  |  |  |  |  |  |  |  |  |  |  |  |  |  |  |  |  |  |  |  |  |  |  |  |  |  |  |  |  |  |  |  |  |  |  |  |  |  |  |  |  |  |  |  |  |  |  |  |  |  |  |  |  |  |  |  |  |  |  |  |  |  |  |  |  |  |  |  |  |  |  |  |  |  |  |  |  |  |  |  |  |  |  |  |  |  |  |  |  |  |  |  |  |  |  |  |  |  |  |  |  |  |  |  |  |  |  |  |  |  |  |  |  |  |  |  |  |  |  |  |  |  |  |  |  |  |  |  |  |  |  |  |  |  |  |  |  |  |  |  |  |  |  |  |  |  |  |  |  |  |  |  |  |  |  |  |  |  |  |  |  |  |  |  |  |  |  |  |  |  |  |  |  |  |  |  |  |  |  |  |  |  |  |  |  |  |  |  |  |  |  |  |  |  |  |  |  |  |  |  |  |  |  |  |  |  |  |  |  |  |  |  |  |  |  |  |  |  |  |  |  |  |  |  |  |  |  |  |  |  |  |  |  |  |  |  |  |  |  |  |  |  |  |  |  |  |  |  |  |  |  |  |  |  |  |  |  |  |  |  |  |  |  |  |  |  |  |  |  |  |  |  |  |  |  |  |  |  |  |  |  |  |  |  |  |  |  |  |  |  |  |  |  |  |  |  |  |  |  |  |  |  |  |  |  |  |  |  |  |  |  |  |  |  |  |  |  |  |  |  |  |  |  |  |  |  |  |  |  |  |  |  |  |  |  |  |  |  |  |  |  |  |  |  |  |  |  |  |  |  |  |  |  |  |  |  |  |  |  |  |  |  |  |  |  |  |  |  |  |  |  |  |  |  |  |  |  |  |  |  |  |  |  |  |  |  |  |  |  |  |  |  |  |  |  |  |  |  |  |  |  |  |  |  |  |  |  |  |  |  |  |  |  |  |  |  |  |  |  |  |  |  |  |  |  |  |  |  |  |  |  |  |  |  |  |  |  |  |  |  |  |  |  |  |  |  |  |  |  |  |  |  |  |  |  |  |  |  |  |  |  |  |  |  |  |  |  |  |  |  |  |  |  |  |  |  |  |  |  |  |  |  |  |  |  |  |  |  |  |  |  |  |  |  |  |  |  |  |  |  |  |  |  |  |  |  |  |  |  |  |  |  |  |  |  |  |  |  |  |  |  |  |  |  |  |  |  |  |  |  |  |  |  |  |  |  |  |  |  |  |  |  |  |  |  |  |  |  |  |  |  |  |  |  |  |  |  |  |  |  |  |  |  |  |  |  |  |  |  |  |  |  |  |  |  |  |  |  |  |  |  |  |  |  |  |  |  |  |  |  |  |  |  |  |  |  |  |  |  |  |  |  |  |  |  |  |  |  |  |  |  |  |  |  |  |  |  |  |  |  |  |  |  |  |  |  |  |  |  |  |  |  |  |  |  |  |  |  |  |  |  |  |  |  |  |  |  |  |  |  |  |  |  |  |  |  |  |  |  |  |  |  |  |  |  |  |  |  |  |  |  |  |  |  |  |  |  |  |  |  |  |  |  |  |  |  |  |  |  |  |  |  |  |  |  |  |  |  |  |  |  |  |  |  |  |  |  |  |  |  |  |  |  |  |  |  |  |  |  |  |  |  |  |  |  |  |  |  |  |  |  |  |  |  |  |  |  |  |  |  |  |  |  |  |  |  |  |  |  |  |  |  |  |  |  |  |  |  |  |  |  |  |  |  |  |  |  |  |  |  |  |  |  |  |  |  |  |  |  |  |  |  |  |  |  |  |  |  |  |  |  |  |  |  |  |  |  |  |  |  |  |  |  |  |  |  |  |  |  |  |  |  |  |  |  |  |  |  |  |  |  |  |  |  |  |  |  |  |  |  |  |  |  |  |  |  |  |  |  |  |  |  |  |  |  |  |  |  |  |  |  |  |  |  |  |  |  |  |  |  |  |  |  |  |  |  |  |  |  |  |  |  |  |  |  |  |  |  |  |  |  |

|             |   | K-box |    |   |   |   |   |   |   |   |   |   |   |     |   |   |   |   |   |   |   |   |   |   |     |   |   |   |   |   |   |   |   |   |   |   |   |   |   |   |   |   |   |   |   |   |   |   |   |   |   |   |   |   |   |   |   |   |   |   |   |     |   |     |     |     |
|-------------|---|-------|----|---|---|---|---|---|---|---|---|---|---|-----|---|---|---|---|---|---|---|---|---|---|-----|---|---|---|---|---|---|---|---|---|---|---|---|---|---|---|---|---|---|---|---|---|---|---|---|---|---|---|---|---|---|---|---|---|---|---|---|-----|---|-----|-----|-----|
|             |   | *     | 80 |   |   |   |   |   |   |   |   |   | * | 100 |   |   |   |   |   |   |   |   |   | * | 120 |   |   |   |   |   |   |   |   |   | * |   |   |   |   |   |   |   |   |   |   |   |   |   |   |   |   |   |   |   |   |   |   |   |   |   |   |     |   |     |     |     |
| TPI         | : | D     | M  | L | D | G | Y | Q | N | A | S | G | R | L   | W | D | A | K | H | N | L | S | N | E | I   | D | R | I | K | K | E | N | S | M | Q | V | K | L | R | H | L | K | G | E | D | I | N | Q | L | T | H | K | E | L | I | M | E | E | A | L | Q | N   | : | 130 |     |     |
| TPI (ms-30) | : | D     | M  | L | D | G | Y | Q | N | A | S | G | R | L   | W | D | A | K | H | N | L | S | N | E | I   | D | R | I | K | K | E | N | S | M | Q | V | K | L | R | H | L | K | G | E | D | I | N | Q | L | T | H | K | E | L | I | M | E | E | A | L | Q | N   | : | 130 |     |     |
| TPI (ms-33) | : | D     | M  | L | D | G | Y | Q | N | A | S | G | R | L   | W | D | A | K | H | N | L | S | N | E | I   | D | R | I | K | K | E | N | S | M | Q | V | K | L | R | H | L | K | G | E | D | I | N | Q | L | T | H | K | E | L | I | M | E | E | A | L | Q | N   | : | 84  |     |     |
| PI          | : | A     | M  | L | D | G | Y | Q | N | L | S | G | K | K   | L | W | D | A | K | H | N | L | S | N | E   | I | D | R | I | K | K | E | N | S | L | Q | L | B | L | R | H | L | K | G | E | D | I | Q | S | L | N | L | K | N | L | M | A | V | E | H | A | T   | E | H   | :   | 130 |
| GhMADS9     | : | D     | I  | L | D | G | Y | Q | N | T | S | G | K | K   | L | W | D | A | K | H | N | L | S | N | E   | I | D | R | I | K | K | E | N | S | M | Q | I | B | L | R | H | L | K | G | E | D | I | T | S | L | P | Y | K | E | L | M | A | L | E | D | A | L   | N | :   | 130 |     |
| NbGLOBOSA2  | : | D     | M  | L | D | G | Y | Q | N | T | S | G | R | L   | W | D | A | K | H | N | L | S | N | E | I   | D | R | I | K | K | E | N | S | M | Q | I | B | L | R | H | L | K | G | E | D | I | N | S | L | N | H | K | E | L | M | M | E | E | A | L | Q | N   | : | 130 |     |     |
| PhPMADS 2   | : | D     | M  | L | D | G | Y | Q | N | T | S | G | R | L   | W | D | A | K | H | N | L | S | N | E | I   | D | R | I | K | K | E | N | S | M | Q | V | K | L | R | H | L | K | G | E | D | I | N | S | L | N | H | K | E | L | M | L | E | E | G | L | T | N   | : | 130 |     |     |
| PFGL02      | : | D     | I  | L | D | G | Y | Q | N | T | S | G | R | L   | W | D | A | K | H | N | L | S | N | E | I   | D | R | I | K | K | E | N | S | M | Q | V | K | L | R | H | L | K | G | E | D | I | N | S | L | N | H | K | E | L | M | M | E | E | A | L | Q | N   | : | 130 |     |     |
| VpPI        | : | E     | L  | L | D | R | Y | H | T | Q | S | G | K | R   | L | W | D | A | K | H | N | L | S | N | E   | I | D | R | V | K | K | E | N | S | M | Q | I | B | L | R | H | L | K | G | E | D | I | T | S | L | H | H | K | E | L | M | A | T | E | E | A | L   | T | :   | 130 |     |
| AmGLOBOSA   | : | D     | M  | L | D | R | Y | H | T | Q | S | G | K | R   | L | W | D | A | K | H | N | L | S | N | E   | I | D | R | V | K | K | E | N | S | M | Q | I | B | L | R | H | L | K | G | E | D | I | T | S | L | N | H | K | E | L | M | L | E | D | A | L | N   | : | 130 |     |     |
| AcPI        | : | D     | I  | L | D | R | Y | H | T | Q | S | G | K | R   | L | W | D | A | K | H | N | L | S | N | E   | I | D | R | I | K | K | E | N | S | M | Q | I | B | L | R | H | L | K | G | E | D | I | T | S | L | H | H | K | E | L | M | A | L | E | E | A | L   | N | :   | 130 |     |
| CaPMADS 2   | : | D     | I  | L | D | R | Y | H | T | Q | S | G | K | R   | L | W | D | A | K | H | N | L | S | N | E   | I | D | R | I | K | K | E | N | S | M | Q | V | K | L | R | H | L | K | G | E | D | I | N | S | L | N | H | K | E | L | M | M | E | E | A | L | N   | : | 130 |     |     |
| CpPMADS 2   | : | N     | M  | L | D | R | Y | H | T | Q | S | G | K | R   | L | W | D | A | K | H | N | L | S | N | E   | I | D | R | V | K | K | E | N | S | M | Q | I | B | L | R | H | L | K | G | E | D | I | T | S | L | N | H | R | L | M | A | T | E | E | T | : | 130 |   |     |     |     |
| CkPI        | : | D     | I  | L | D | R | Y | H | T | Q | S | G | K | R   | L | W | D | A | K | H | N | L | S | N | E   | I | D | R | I | K | K | E | N | S | M | Q | I | B | L | R | H | L | K | G | E | D | I | T | S | L | H | Y | K | E | L | M | A | T | E | E | A | L   | N | :   | 130 |     |
| StPMADS 2   | : | D     | M  | L | D | G | Y | Q | N | A | S | G | R | L   | W | D | A | K | H | N | L | S | N | E | I   | D | R | I | K | K | E | N | S | M | Q | V | K | L | R | H | L | K | G | E | D | I | N | Q | L | T | H | K | E | L | I | M | E | E | A | L | Q | N   | : | 130 |     |     |

|             |   | 140 |   |   |   |   |   |   |   |   |   | * | 160 |   |   |   |   |   |   |   |   |   | * | 180 |   |   |   |   |   |   |   |   |   | * |   |   |   |   |       |   |   |   |   |   |   |   |       |   |   |   |   |   |   |   |     |     |     |     |   |     |     |   |     |
|-------------|---|-----|---|---|---|---|---|---|---|---|---|---|-----|---|---|---|---|---|---|---|---|---|---|-----|---|---|---|---|---|---|---|---|---|---|---|---|---|---|-------|---|---|---|---|---|---|---|-------|---|---|---|---|---|---|---|-----|-----|-----|-----|---|-----|-----|---|-----|
| TPI         | : | G   | L | S | S | I | S | A | K | Q | S | E | I   | L | R | M | V | R | K | N | D | I | L | E   | E | N | K | L | Q | Y | A | L | H | K | E | M | G | A | I     | G | S | G | N | M | R | G | I     | H | E | E | - | V | Y | H | Q   | R   | E   | R   | D | -   | Y   | : | 193 |
| TPI (ms-30) | : | G   | L | S | S | I | S | A | K | Q | S | E | I   | L | R | M | V | R | K | N | D | I | L | E   | E | N | K | L | Q | Y | A | L | H | K | E | M | G | A | I     | G | S | G | N | M | R | G | I     | H | E | E | - | V | Y | H | Q   | R   | E   | R   | D | -   | Y   | : | 193 |
| TPI (ms-30) | : | G   | L | S | S | I | S | A | K | Q | S | E | I   | L | R | M | V | R | K | N | D | I | L | E   | E | N | K | L | Q | Y | A | L | H | K | E | M | G | A | I     | G | S | G | N | M | R | G | I     | H | E | E | - | V | Y | H | Q   | R   | E   | R   | D | -   | Y   | : | 147 |
| PI          | : | G   | L | D | K | I | R | D | H | Q | I | E | I   | L | I | S | K | R | R | N | E | K | M | A   | E | E | Q | R | L | T | F | Q | L | Q | Q | E | M | A | ----- | I | A | S | N | A | R | G | ----- | M | M | R | I | - | H | : | 183 |     |     |     |   |     |     |   |     |
| GhMADS9     | : | G   | L | T | Q | I | R | A | K | M | D | V | L   | M | A | K | N | K | T | F | L | E | E | N   | K | L | Q | Y | A | L | H | K | E | M | G | A | I | G | S     | G | N | M | R | G | I | H | E     | E | - | V | Y | H | Q | R | E   | R   | D   | -   | Y | :   | 191 |   |     |
| NbGLOBOSA2  | : | G   | L | S | S | I | S | A | K | Q | S | E | I   | L | R | M | V | R | K | N | D | I | L | E   | E | N | K | L | Q | Y | A | L | H | K | E | M | G | A | I     | G | - | G | N | M | R | - | V     | I | Q | E | E | V | Y | H | Q   | R   | E   | R   | D | -   | Y   | : | 191 |
| PhPMADS 2   | : | G   | L | S | S | I | S | A | K | Q | S | E | I   | L | R | M | V | R | K | N | D | I | L | E   | E | N | K | L | Q | Y | A | L | H | K | E | M | G | A | I     | G | - | G | N | M | R | - | M     | I | - | E | E | V | Y | H | Q   | R   | E   | R   | D | -   | Y   | : | 190 |
| PFGLO2      | : | G   | L | S | S | I | S | A | K | Q | S | E | I   | L | R | M | V | R | K | N | D | I | L | E   | E | N | K | L | Q | Y | A | L | H | K | E | M | G | A | I     | G | - | G | N | M | R | G | I     | H | E | E | - | V | Y | H | Q   | R   | E   | R   | D | -   | Y   | : | 191 |
| VpPI        | : | G   | L | G | V | R | N | K | M | E | V | H | R   | M | E | K | N | K | L | E | D | T | L | R   | S | E | I | L | Q | Q | E | L | A | - | L | E | E | N | A     | R | M | E | N | A | Y | H | -     | - | Q | R | A | E | - | Y | :   | 190 |     |     |   |     |     |   |     |
| AmGLOBOSA   | : | G   | T | S | A | L | K | N | K | M | E | F | V   | R | M | R | K | H | N | M | V | E | E | N   | Q | S | L | Q | F | K | R | M | H | D | P | - | N | D | N     | V | M | S | Q | A | V | D | H     | H | H | E | N | T | A | L | -   | Y   | :   | 194 |   |     |     |   |     |
| AcPI        | : | G   | L | S | G | I | R | E | N | K | M | E | V   | F | K | M | M | K | N | E | K | L | E | D   | N | H | L | N | F | M | L | H | Q | Q | M | T | - | E | S     | - | R | E | M | E | N | G | Y     | - | - | - | H | Q | R | V | R   | D   | -   | Y   | : | 187 |     |   |     |
| CaPMADS 2   | : | G   | L | S | S | I | S | A | K | Q | S | E | I   | L | R | M | V | R | K | N | D | I | L | E   | E | N | K | L | Q | Y | A | L | H | K | E | M | G | A | I     | G | - | G | N | M | R | G | I     | H | E | E | A | M | Y | H | Q   | R   | E   | R   | D | -   | Y   | : | 193 |
| CpPMADS 2   | : | G   | L | A | S | V | R | N | K | M | E | V | L   | K | M | M | R | N | E | K | L | E | E | N   | R | L | S | F | A | - | Q | Q | E | L | A | - | I | E | N     | S | A | R | E | M | E | N | G     | Y | - | - | Q | Q | R | E | -   | Y   | :   | 189 |   |     |     |   |     |
| CkPI        | : | G   | L | I | S | N | S | E | K | G | R | E | I   | R | M | M | K | N | E | K | L | E | E | Y   | H | L | T | Y | L | Q | H | Q | E | L | - | E | N | L | R     | E | M | E | N | G | - | - | -     | H | Q | R | V | R | D | - | Y   | :   | 189 |     |   |     |     |   |     |
| StPMADS 2   | : | G   | L | S | S | I | S | A | K | Q | S | E | I   | L | R | M | V | R | K | N | D | I | L | E   | E | N | K | L | Q | Y | A | L | H | K | E | M | G | A | I     | G | S | G | N | M | R | G | I     | H | E | E | - | V | Y | H | Q   | R   | E   | R   | D | -   | Y   | : | 194 |

**Figure S3.** Multiple alignment of TPI proteins based on their full-length sequences. Entire protein sequences were aligned using ClustalW in MEGA X (Kumar et al., 2018) with default settings, and conserved amino acids are shaded using GeneDoc (Nicholas and Nicholas, 1997). The MADS domain and K-box are marked above the alignment. TPI presents the TPI protein in WT-30 and WT-33. TPI (*ms-30*) indicates the TPI protein in *ms-30* mutant and TPI (*ms-33*) indicates the protein in the *ms-33* mutant. The sequences of these proteins were downloaded from NCBI GenBank by using the following accession numbers: PI (AAD51988.1), GhMADS9 (XP\_016742051.1), NbGLOBOSA2 (AWD93715.1), PhPMADS 2 (Q07474.1), PFGLO2 (AGN54426.1), VpPI (APQ46145.1), AmGLOBOSA (Q03378.1), AcPI (ADU15475.1), CaPMADS 2 (NP\_001311952.1), CpPMADS 2 (XP\_021902590.1), CkPI (AGA61757.1), and StPMADS 2 (XP\_006365936.1).

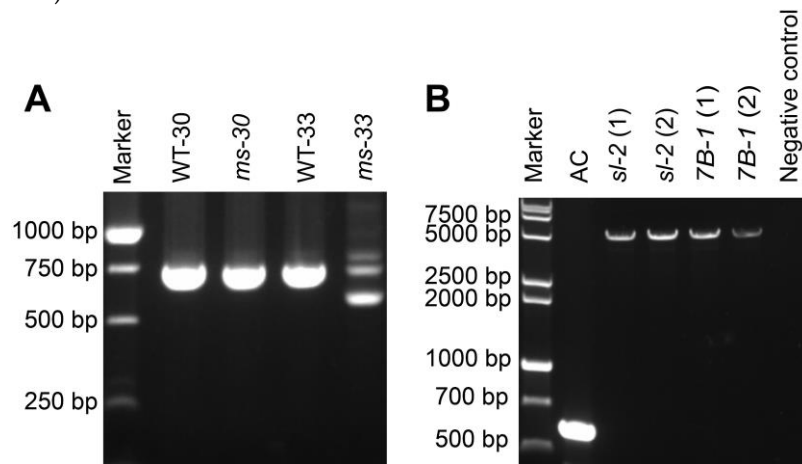

**Figure S4.** Electrophoresis detection of alternatively spliced transcripts in *ms-33* and the retrotransposon insertion in *7B-1* and *sl-2*. (A) Agarose gel electrophoresis of *TPI* CDS amplified from the flower cDNA of WT or mutant plants of *ms-30* or *ms-33* using the primer pair TPICDS. (B) Agarose gel electrophoresis of PCR fragments amplified from the WT genome DNA, two plant genome DNAs of the *sl-2* mutant, and two plant genome DNAs of *7B-1* using the primer pair LeGLO2-6.



GGTTTCTCGGGGATTAGTATGAAAATTACAGGAAAATAAGTTTCATGCGAATTTTCATACTAATTTCTACGAAAACTCCATATTATTCATAGTTTCTTC  
GAGTGATAGTGACAAATTAATAATAGATGTTTGGTTAACTATTGTCTCTTCAAATTTGTATGTTTTGGATTCTCAAAGCACCAAAAGGAGATGGGAGCCAT  
TGGTGGAAAGTGGAAATATGAGAGGAATTCATGAAGAAGTCTATCTGTTGTCGGAATTTGAGATAATACGAGAAAAATATAACCGGAAAAATAAGACAACAGA  
TTTACGTGGTTCCCAACAAATTTGGCTACGTCCACGGGAAGAGAGGAGCAGTTTATTATGGAGAGGCAAAAACAGAAATTCAGAAATAGGGTTTCCCATAGC  
GTCTATATATAGTGCTAAGCTACGCCCTAACAGGCTTGGGCCAACATACAGAATCAACAGAAAAATTAAGGGCCCAATACAACAACATTGTATACCGTCGGCC  
CGGGGGCGTCTCCGCCCCCGGACCCCGAGGCCAGGGGGCGCGTCCGCCCCCTGGACCCCCGACTCGTGACCGGGCAGCGAGACCCCGCTCTTTCTGTT  
TGTAGCGGGTCCGATTCAAGGCATTCAACAAATCTCCACCTTGACTTGAATTTCTCGAACAGATTCTTCAGACGCACTATGATAGTGCCAAGCCTCCCCCTCT  
TCCTCAGAGTTGCCCGCAGGGCAATTAACAGCTTCTGATGTTGAGCAAGTCCAAACAGTTGAAACTTGCTCTGTGGAACCGGCTTGTGAACATATCAGC  
AGGATTATCAGCAGTTCTACTTTCTCACCTTGATTCTCTTCTCACTTCTTAGAAAAATGATACCTTACGTCAATATGCTTGGTTCTCTCATGATGGACTTGA  
TCCTTGGCTAGACAAATTCGCTCAAACTGTACAATACACCGTAGCCTGATCATGATGCAGACCAAGATCACTAACAGCCCTTCAACCAAAATCCCTTCTT  
TTGAGCCTCTGTCAAGGCCATGACTCCGCTTCCGTAGTAGACAAAGTCACTGTAGGTTGCAAAGTTGCCTTCCAACGTACGACAGATCTCCAAGGGTAAA  
CACATAGCCAGTCATCGATCTTCTGTGTCAACATCTCCAGCATAGTCTGAATCAGAATAGCCAGTAACCAAGCACTGAGTATCACCTCCATAAATGAGACCA  
ACGTACAGATGTACCTCTAAGGTACCGGAAAAATCTCTTCACAGCCTGCCAATGTTCTCTCCCTGGTTGTCCCATGAATCTGCTCACTACACTGACTGCATGTG  
CTAAATCTGGCCTTGTACAGACCATAGCATACATACTCAAACTTCTACGGCACTGGCATAAAGGACTCGTGACATATACTCTTCTCTTCTGACTGTGGAGC  
GAACATGGCAGTGAGATGGATATTGGCAGCACTGGGGGTATCAATGGGCTTAGATGAAGACATGCCAAACCTCGCAAGACCTTCTGAATGTAGCTTCTCTGT  
GACAAGAAAAAGTTTCTCTCTCTGTCTCTAATGATCTCCATCCCTAAATCTTCGAGCGGCTCCAGATCCTTCATCTCAAACTCAGCACTAAGATAAAC  
CCTTCAGCTTCTGAATGTACATCTTCTTGTGACGTATCAACATATCATCTACATAAAGCACCAGATAGATGAATGAATCATCATTGAGCCTATTGTAGTA  
GACACAACATCATATGAGCTCCGAGTATAGCCAACTTACCATATAGCTGTCAAACCTTTTATACCACTGCCTTGGAGACTGCTTAAGTCCATATAAGGAC  
TTCTTCAACTTGCAGACGTGATTTCTTCCCTGGAACTTGGAAACCATCCGGCTGAGTCATGTATATCTTCTCTCAACTCTCCATGTAGAAACGCTGTCT  
TCACATCAAGTTGTTCAAGCTCCAGATTCTGATGTGCAACTATCGCTAGTAACACTCGGATGGAAGTATGTCTGACCACTGGTGAGAAGATCTCATTGTAGTC  
CACTCCCTCTTCTGGTTGAAACCTCTGGCAACAACCTGGCTTTTACTTGACTCTTCTGCTGGTGATATCCCTTCTCTTCTTGAACCCATTGTCAA  
GTAATAATCTTCTCCCGAAGGCTGTATGACCAGATCCCATGTCTGATTCTGTGTAGGAGCTCCATCTCATCTCCCATAGCGGCAAAACCTTTTTCAGAAAT  
CAGAACTTAAAAATGGCTTCTTGTAAAGTAGACGGCTCAGATGTATCACTCTTCAGCAACCTGCAGTGCATAACCCACCATGCTCTAAAACCATACCTCGT  
AGGTGGCCGAACCTCAACCCCTCTTGGCGATCTTGAGCTATACTCTGATGGATATCTGATGGCATAGATTCTGGAATATCAGTTTCACTGTGTGGCTCTTGA  
TCCTCTCTCTCAGGTTCTTTAAATCGCTCTCGTTCTGAATGACTTGAAACTCCACCTGTTTGTCAAGACTCCAGTTTCTGACGTAGTTGTAGGCTTCACAA  
TGGTTCTAAGCAGAGGACTTTCATCAAGACAAACGTTCTCTGCTCATAATAACCCCTTTTCTGCTGGAGACCAAGTTCTGAAACCTTCACTCCATCTCCGTA  
GCCCAAAATCTCCCTTTTAGCTCTTGGTTCTAATTAACCTTCACTGACGTGATAGTAAGCCGTACAACCAAAAGCTTTCAGATTGAATAATCAGCAGCT  
TTTCCAGACCATCTCCATAGGTGCTTGCACGTATACCTGTATGTGGTCCGCGTTAATCAAGTAGCAAGCTGTACTAACCGCTCTGCCAGAACTCTTC  
TATCTAGCCAGCATTAGAGAGCATGCACCTTGCTCTCTCCAGAAGTGTGATTCTCCGCTCAGCTACACCGTTCTGCTGTGGTGTATTCTGACTGTGCG  
ATGTCGAGCAATCCCTTCATCTTACAGAATTGATCAAAATTCAGACCAACAGAATCCAGCCCATATCAGTTCCGAACCTCTTGATCTCTTCCCTGTTTGA  
TTTTCCATCAAAATTTTCCACTCCTTGAACCTTCTGGAAGGCTTCACTTTATGCTTCATCATGTACACCAAGTCATCCTTGAGTAGTCATCAATATGAGACA  
CAAAAAATCTCGACGCTCCCAAGACTCAACACGGCATGGACCCAGCAATCAGAATGGATATAATCAAGTGTGCCTTTTGTCTATGAATGGCCTTTGGA  
CTTGTTCGAGTGTAGTTTCCAAAAACAAATGTTCAAAAACTTAGGCTCTTAACCTTATGACCAGCAAGTAATCCTCCTTTCAGAGAATTGTCATCCCT  
CTTTCACCCATATGACCAAGTCTTATGTGCCATAAATAGTCATATCCTTCTGGTGAAATTTCTGACGATGCAACATGGGCTGAACCTGTAAACCGTGGAACTT  
GTAGAAAAATACAAAGTACCACGCATGACACCTTTCAGAATCAAAATTTGAACCTTCCAGACCCGCAAGACTCCATCTTTCCGACCAAGCTGAATCCCTTGT  
GTCCAAAAAGACTGAGAGATATCAGATTTCGTCATCAATGGAACGTGCCTGACCTCGTTCAATGTGCAAGAGTACCGTCATGTGCTCTATCTTGATCGA  
GCCTGTCCCAACCACTTGCAGACAGAATGTTGCCATCGAGATGCTGCCTCCGCTCACTGCTCATAAGTCGTGAACCACTCTCTCCTAGGACAGATGTGA  
TAGGATGCCCAAGATCAAGAACCCACATCTGAATGATGAGTGTGCTCATCCGCAACTAGGGCAATATCTTCTCAGAATTGGTGTCTTCTCAGCAACAG  
CAGCAGACACTGATTGTTTTCCGATTGCTTCTTCTTCCGACAATCAAAATTTCAATGTCCCTTCTCCTTGCAGTAATTACAAACATCATCCGGCTTTGC  
ACCTTCCGACATCGGCTTATTTTTCTTCCGCGTTTCTCTCCCTTCTGCTACTGGTGAACAGACCGGAAGGCTGTATGTCCGCTACTGTGCGGTTAGCC  
TTATGCGGTAATTCCTGCTATGAAGGGCTGATCTGACTTCTCCAGTGACACAGTATCTTTCCAAACATGAACGATTGAACAAAAATTTCTCAACGACATTG  
GGAGAGATACTAACAGAATCAGGGCAGCATCTTCATCCTCGATCTTCACATCGATATACGCAATTTCTAATAACAAAGTATTCAATTGCTCTAAGTGTCCCT  
GAGTTGTGTACCTTCAGCCATTCTGTAACCGAATAGACGTTGTTTCAAGAGCAGCTTGTGGTTAGAGATTTGTCTATGACAACTCTCCAGCTTCAACCA  
AGACCAGCAGCAGTCTTCTCATCCGAGACCTCCGTGATGACGTCATCCGCGAGACACAGCATGATCGTGCAGTGCCTTTCTCCAGAATCGCCATCTCAG  
GAGTAACGACGGCGTTCTTGTCTTTCGACAACGGCGCCAGAAGCCTTGCTGTTTCAACAGGCCCGCATCTTGATCTGCCATAAACTGAACTGTTCTCCCT  
TGTGAATTTGTGATTTTTCAGCTTCAAAGCAGACATCTCGAATTTCCAAAGAACACCGATTAAACCGAGAGGCTCTGATACCAAGTTTGTGTGCGGAATTTGAG  
ATAATACGAGAAAAATATAACCGGAAAAATAAGACAACAGATTACGTGGTTACCAACAAATTTGGTACGTCCACGGGAAGAGAGGAGCAGTTTATTATG  
GAGAGGCAAAAAACAGAATTACAGAATAGGGTTTCCATAGCGTCTATATATAGTGCTAAGCTACGCCCTAACAGGCTTGGGCCCAACATACAGAATCAACAGA  
AAATTAAGGGCCCAATACAACAACATTGTATACCGTCGGCCCGGGGCGTCTCCGCCCCCGGACCCCAAGGCCAGGGGGCGCTCGCCCCCTTGAACCCCT  
CGACTCGTGACCGGGCAGCGAGACCCCGCTCTTCTGTTGAGGGGTCGATTCAAGGCATTCAACAGTATCAAAAGAGAAAGGATTATGAGTACCA  
AATGCCATTGGCCTACGAGTTCAGCCAATGCAGCCAATCTACATGAAGAATGTAATTAATTTCCACTTTAAATTAAGAAGCTTAATAATTTTA  
ATTGGGTTTCTACTATAGCTAGAAACACTAATTAATCAATTCTAGTTATATGTAATGAGTATTAGCTAAGACTTTGTTTCATGTTGGAAATTAATACCTAAT  
TTATGGGCTCTTCCCATGGTTTAAATTAAGTACTGAAATGTAGTGACATATTATATGAATTTGTTCTACTTACCTAGCTACTACATTTTTCATTTGATT  
TGGTCTAGATGGATTCTGAAAAAC

**Figure S5.** Sequence of the long terminal repeat retrotransposon inserted in the *TPI* gene in *7B-1* and *sl-2* mutants. Green letters represent the genome sequence of the *TPI* gene, whereas gray letters represent the direct repeat sequence of the retrotransposon. Red letters represent the target site duplication (TSD) sequence. The fragment was amplified using the primer pair LeGLO2-6 (Pucci et al., 2017) from *7B-1* and *sl-2* mutants.

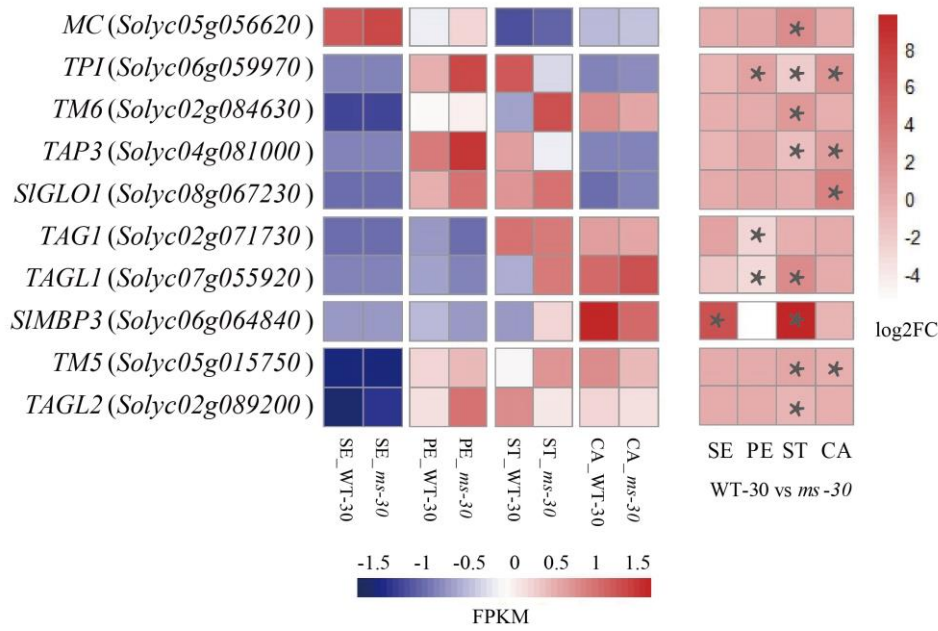

**Figure S6.** Heatmap of tomato ABCDE model genes between WT-30 and *ms*-30. *MC* is A-class gene; *TPI*, *TM6*, *TAP3*, and *SIGLO1* are B-class genes; *TAG1* and *TAGL1* are C-class genes; *SIMBP3* is a D-class gene; and *TAGL2* and *TM5* are E-class genes. The heatmap of FPKM is shown on the left. The heatmap of log2FC is shown on the right. Asterisks indicate a significant difference (\*,  $p < 0.05$ ) between WT-30 and *ms*-30. SE, Sepals; PE, Petals; ST, Stamens; and CA, Carpels.

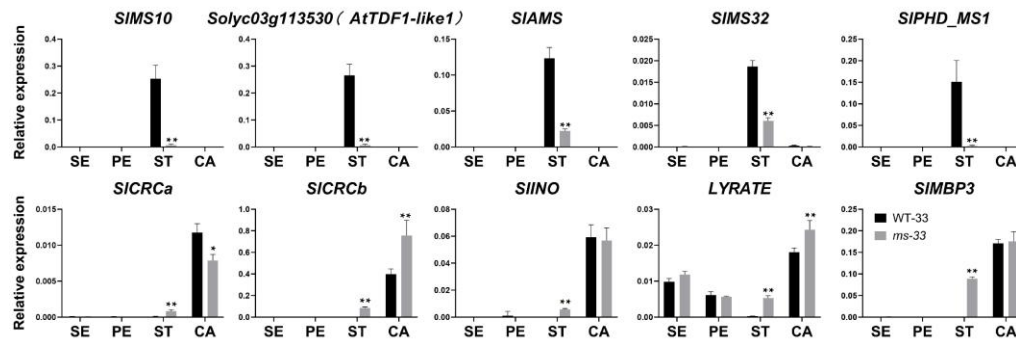

**Figure S7.** Expression patterns of stamen and carpel development-related genes in the flowers of WT-33 and *ms*-33. Asterisks indicate a significant difference (\*,  $p < 0.05$ ; \*\*,  $p < 0.01$ ) between WT-33 and *ms*-33. SE, Sepals; PE, Petals; ST, Stamens; and CA, Carpels

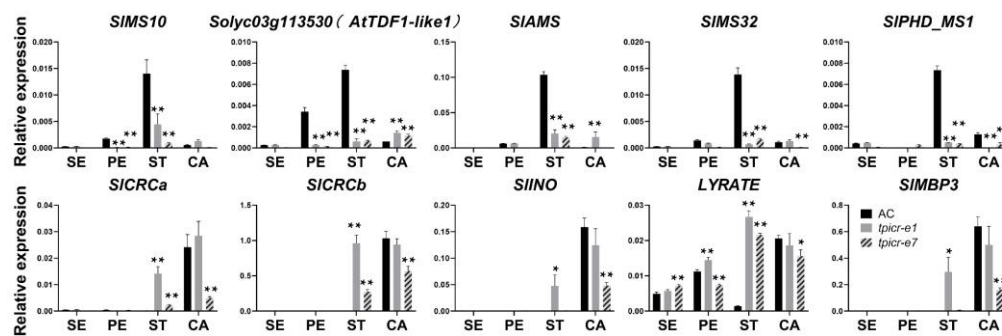

**Figure S8.** Expression patterns of stamen and carpel development-related genes in the flowers of AC and the *TPI* gene-edited mutants *tpicr-e1* and *tpicr-e7*. Asterisks indicate a significant difference (\*,  $p < 0.05$ ; \*\*,  $p < 0.01$ ) between AC and *tpicr-e1*, *tpicr-e7*. SE, Sepals; PE, Petals; ST, Stamens; and CA, Carpels

## References

- Kumar, S., Stecher, G., Li, M., Knyaz, C., Tamura, K., 2018. MEGA X: molecular evolutionary genetics analysis across computing platforms. *Mol Biol Evol*, 35: 1547-1549.
- Nicholas, K. B., Nicholas, H. B., 1997. GeneDoc: A tool for editing and annotating multiple sequence alignments. Ver. 2.7.000. 1996. Distributed by the author.
