# Supplementary material for: Candidate Gene Identification and Transcriptome Analysis of Tomato male sterile-30 and Functional Marker Development for ms-30 and Its Alleles, ms-33, 7B-1, and stamenless-2
Source: Int J Mol Sci. 2024 Mar 15;25(6):3331. doi: 10.3390/ijms25063331 (PMC10970333; doi:10.3390/ijms25063331)
Supplement: Supplementary file 1 [file ijms-25-03331-s001.zip › Supplementary Material B ms-30 supplementary material Tables S1~S12 .xlsx]

## Sheet: Table S1
Table S1 Stamen phenotype of the mutants ms-30 and ms-33 as well as respective wild-type plants
Mutant system	Genotype	No. of observed stamens	Frequency(%) of stamens with phenotype
			NO	CS	EO	TC
ms-30	WT-30	125	100	0	0	0
	ms-30	187	0	23.5	63.1	13.4
ms-33	WT-33	134	100	0	0	0
	ms-33	248	0	30.7	67.7	1.6
NO,normal stamens; CS, carpelloid structures ; EO, naked external ovules on the adaxial surface; TC, complete transformation into carpels.

## Sheet: Table S2
Table S2 Predicted genes in the ms-33 region
Gene Name	Position on SL4.0ch06	Putative function
Solyc06g059930	35503650..35543738(+)	sesquiterpene synthase 1
Solyc06g059960	35545393..35569077(-)	Histone-lysine N-methyltransferase ASHH2
Solyc06g059970	35575492..35578559(-)	Tomato PISTILLATA (TPI, syn. SlGLO2)
Solyc06g059980	35588500..35603986(+)	O-fucosyltransferase family protein
Solyc06g059990	35604247..35605881(-)	Alkyl transferase
Solyc06g150121	35616895..35617868(-)	Cytochrome 71D7
Solyc06g060010	35626847..35632412(+)	Terpene synthase
Solyc06g060015	35635674..35641561(+)	Cytochrome 71D7
Solyc06g060050	35643516..35645414(+)	Pentatricopeptide repeat-containing protein, mitochondrial
Genes were identified using the tomato gene model (ITAG release 4.0, SL4.0) in SGN (https://solgenomics.net/). + Indicates sense strand; − indicates antisense strand

## Sheet: Table S3 
Table S3 Allelism test among ms-30, ms-33, and their alleles
year	Female line	Male line	No. of plants grown	Plants with stamen phenotype
				WT	Mutant
2019	sl-2-/-	ms-30+/-	49	26	23
	sl-2-/-	ms-33+/-	37	22	15
2020	sl-2-/-	ms-30+/-	61	29	32
	sl-2-/-	ms-33+/-	28	15	13
2023	ms-30-/-	tpicr-e1+/-	37	21	16
	tpicr-e1-/-	ms-30+/-	30	17	13
	ms-30-/-	tpicr-e7+/-	49	21	28
	tpicr-e7-/-	ms-30+/-	45	27	18
"+/-" and "-/-" respectively represent heterozygous and homozygous mutant genotypes.

## Sheet: Table S4
Table S4 Statistical results of RNA-seq data
Sample name	RawReads	RawBases	RawQ20	RawQ30	RawGC	Length	Mapped reads %
SE-F1	30808041	9242412300	98.03;96.32	94.43;91.68	43.67;43.73	150;150	0.9832
PE-F1	21394169	6418250700	97.94;96.21	94.38;91.69	43.42;43.3	150;150	0.9771
ST-F1	21300645	6390193500	98.13;96.3	94.6;91.9	42.71;42.64	150;150	0.9838
CA-F1	26248761	7874628300	98.08;96.58	94.53;92.35	43.47;43.35	150;150	0.9868
SE-F2	26152363	7845708900	97.86;95.65	93.98;90.73	43.3;43.46	150;150	0.9793
PE-F2	24104448	7231334400	98.11;96.72	94.68;92.42	42.75;42.57	150;150	0.9737
ST-F2	25385025	7615507500	98.11;96.07	94.66;91.2	42.35;42.3	150;150	0.9812
CA-F2	24168673	7250601900	98.29;97.34	95.03;93.27	42.63;42.33	150;150	0.9885
SE-F3	22440208	6732062400	98.28;97.16	95.04;93.13	42.87;42.53	150;150	0.9844
PE-F3	19682960	5904888000	97.84;96.04	93.92;91.08	42.88;43.03	150;150	0.9725
ST-F3	29534993	8860497900	98.24;96.91	94.9;92.76	42.3;41.99	150;150	0.9834
CA-F3	21540155	6462046500	98.1;96.62	94.45;91.76	42.74;42.7	150;150	0.9875
SE-S1	24307919	7292375700	98.15;97.04	94.84;93.09	43.3;43.04	150;150	0.984
PE-S1	20351902	6105570600	98.26;97.08	95.03;93.03	42.98;42.67	150;150	0.9833
ST-S1	20307931	6092379300	98.07;96.41	94.73;91.91	43.32;43.26	150;150	0.982
CA-S1	24479568	7343870400	98.09;96.42	94.46;91.63	43.05;43.09	150;150	0.988
SE-S2	19446132	5833839600	98.27;96.62	95.03;92.39	43.6;43.37	150;150	0.9851
PE-S2	27198880	8159664000	98.14;96.4	94.89;91.74	43.12;42.83	150;150	0.9755
ST-S2	28965312	8689593600	97.57;95.25	93.47;89.96	44.05;44.62	150;150	0.9807
CA-S2	19834856	5950456800	98.29;97.08	94.99;92.87	42.74;42.47	150;150	0.9891
SE-S3	20406927	6122078100	97.89;95.81	94.09;90.6	43.47;43.69	150;150	0.9839
PE-S3	21565821	6469746300	98.12;96.58	94.63;92.08	42.93;42.82	150;150	0.9792
ST-S3	26092436	7827730800	97.95;96.07	94.12;91.19	43.26;43.28	150;150	0.9827
CA-S3	21830904	6549271200	98.31;96.6	94.97;92.27	43.19;42.95	150;150	0.9863

## Sheet: Table S5
Table S5 FPKM and annotation of all genes from the RNA-seq data
	FPKM
GeneID	SE_WT-30	SE_ms-30	PE_WT-30	PE_ms-30	ST_WT-30	ST_ms-30	CA_WT-30	CA_ms-30	ITAG4.0_gene_description
Solyc00g005280	0	0	0	0	0	0	0	0	Unknown protein
Solyc00g006650	0	0	0	0	0	0	0	0	Unknown protein
Solyc00g007330	0	0	0	0	0	0	0	0	Zinc finger transcription factor 1
Solyc00g007340	0	0	0	0	0	0	0	0	Unknown protein
Solyc00g007350	0	0	0	0	0	0	0	0	zinc finger CCCH domain-containing protein 30-like (AHRD V3.3 *-* A0A2I4HEV8_9ROSI)
Solyc00g007450	0	0	0	0	0	0	0	0	Zinc finger transcription factor 2
Solyc00g007920	0	0	0	0	0	0	0	0	Unknown protein
Solyc00g007930	0	0	0	0	0	0	0	0	Unknown protein
Solyc00g007940	0	0	0	0	0	0	0	0	Unknown protein
Solyc00g011560	0	0	0	0	0.040356	0	0	0	E3 ubiquitin-protein ligase (AHRD V3.3 *-* A0A2G3CLG0_CAPCH)
Solyc00g011660	0	0	0	0	0	0	0.0100507	0	B3 domain-containing protein (AHRD V3.3 *** A0A1Q3DFU3_CEPFO)
Solyc00g011670	0	0	0	0	0	0	0	0	Unknown protein
Solyc00g012540	0	0	0	0	0	0	0	0	Zinc finger transcription factor 3
Solyc00g013100	0	0	0.0279973	0	0.00796533	0	0.025477	0	Unknown protein
Solyc00g013110	0	0	0	0	0.064234	0.00955367	0	0.00580533	Unknown protein
Solyc00g013170	0.0317737	0.119	0.0579387	0.037448	0.23637	0.0521787	0.122292	0.127957	orf101 (mitochondrion) (AHRD V3.3 *-* YP_009430405.1)
Solyc00g013180	0	0	0	0	0	0	0	0	NADH-ubiquinone oxidoreductase chain 4 (AHRD V3.3 *-* A0A290WL40_SOLLC)
Solyc00g014290	0	0	0	0	0	0	0	0	Unknown protein
Solyc00g014790	0	0	0	0	0.17418	0	0	0.0214507	Unknown protein
Solyc00g014800	0	0	0	0	0.0269863	0	0	0	Zinc finger protein KNUCKLES (AHRD V3.3 *** A0A2G3ACW4_CAPAN)
Solyc00g014810	0	0	0	0	0.0948653	0	0	0	Unknown protein
Solyc00g014850	0.0175033	0.149789	0	0	0.325078	0.0701513	0.0873103	0	orf86 (mitochondrion) (AHRD V3.3 *** YP_002608396.1)
Solyc00g014860	0	0	0	0	0	0	0	0	Unknown protein
Solyc00g015600	0.520213	0.511863	0.561851	0.274596	0.605047	0.453836	1.603	2.41429	Unknown protein
Solyc00g016590	0	0	0	0	0	0	0	0	Unknown protein
Solyc00g019730	0.0484547	0.00713367	0	0	0.087039	0.0407273	0.020718	0.080108	Cytochrome c oxidase subunit 3 (AHRD V3.3 *** A0A290WL11_SOLLC)
Solyc00g019750	0.010734	0	0	0.00608233	0.0463927	0	0.0147977	0.044797	Unknown protein
Solyc00g019950	0	0	0.0305323	0.0105817	0.262872	0.082676	0.00669433	0.086844	NADH dehydrogenase subunit 9 (AHRD V3.3 *** A0A290WKX8_SOLLC)
Solyc00g019970	0.081914	0.154942	0.0736567	0.0309423	0.351112	0.229483	0.0895333	0.0407193	Unknown protein
Solyc00g019980	0.048324	0.0449133	0	0.105463	0	0.090848	0.0898193	0.0212527	ribosomal protein L2 (chloroplast) (AHRD V3.3 *-* YP_009232109.1)
Solyc00g019990	0	0	0.101302	0	0.617968	0.146169	0.13199	0.0614927	Unknown protein
Solyc00g020000	0.13806	0.212714	0.113991	0.0675587	1.0149	0.100482	0.396111	0.055407	Unknown protein
Solyc00g020010	0.223662	0.0665563	0.174697	0	2.0477	0.269756	0.729235	0.155237	Unknown protein
Solyc00g020020	0.157366	0	0.057997	0.0474403	0.972827	0.205123	0.092321	0.11504	Unknown protein
Solyc00g020030	0.0565957	0.008567	0.128992	0.045279	0.553501	0.083203	0.00786467	0	Unknown protein
Solyc00g020040	0	0.00606567	0	0	0.109863	0.008324	0.0409667	0	Cytochrome c biogenesis B (AHRD V3.3 *** A0A0C5B708_9SOLA)
Solyc00g021630	0.0902807	0.0805277	0	0	0.128275	0.021419	0.0113003	0.051697	NADH-ubiquinone oxidoreductase chain 6 (AHRD V3.3 *** A0A0C5B7I5_9SOLA)
Solyc00g021640	0.053883	0	0.012191	0.0123933	0.168362	0.104803	0.0207007	0.020442	Ribosomal protein S4 (AHRD V3.3 *** A0A0C5B738_9SOLA)
Solyc00g021650	0	0.0833657	0	0	0.0691	0	0	0	Unknown protein
Solyc00g021660	0	0	0	0	0	0	0	0	Neutral/alkaline invertase (AHRD V3.3 *-* V5N411_MANES)
Solyc00g022070	0	0	0	0	0	0	0	0	Unknown protein
Solyc00g022080	0	0	0	0	0.0745483	0.129907	0	0.0129963	Unknown protein
Solyc00g022090	0	0.00546867	0.0338943	0	0.133878	0	0.0349953	0.007879	Unknown protein
Solyc00g022100	0.115178	0.198818	0.132594	0.0655303	0.637545	0.383892	0.134844	0.277389	Ribosomal protein L10 (AHRD V3.3 *** E0D3E6_SOLLC)
Solyc00g023570	0	0.027477	0	0	0.221498	0.035014	0	0	Unknown protein
Solyc00g023580	0	0	0	0.0458053	0.394075	0	0	0	Unknown protein
Solyc00g023590	0	0	0.0188147	0	0.025537	0.0165943	0	0	Cytochrome f (AHRD V3.3 *-* A0A2G3AYY8_CAPCH)
Solyc00g023600	0.0124807	0	0.110528	0	0.00385767	0.012621	0	0	Unknown protein
Solyc00g023700	0	0	0	0	0	0	0	0	Unknown protein
Solyc00g023710	0	0	0	0	0.0201067	0.005318	0	0	Unknown protein
Solyc00g025290	0.529824	0.359458	0.421482	0.304852	0.998608	0.646175	1.05202	0.404285	hypothetical protein (AHRD V3.3 *** ATMG00660.1)
Solyc00g025300	0	0	0	0	0.232195	0	0	0	transmembrane protein (AHRD V3.3 --* AT2G07674.2)
Solyc00g025400	0	0	0	0	0	0	0	0	Unknown protein
Solyc00g028960	0.251587	0.54986	0	0	0	0	0	0	monothiol glutaredoxin-S1-like (AHRD V3.3 *** A0A1U7WLZ4_NICSY)
Solyc00g032030	0	0	0	0	0	0.008978	0	0	E3 ubiquitin-protein ligase (AHRD V3.3 *-* A0A2G2WYW6_CAPBA)
Solyc00g036520	0.0226517	0	0	0	0.0264657	0	0.001563	0.002101	Unknown protein
Solyc00g036530	0	0	0	0	0	0	0	0	Unknown protein
Solyc00g047180	0	0	0	0	0	0	0	0	Unknown protein
Solyc00g047190	0	0	0	0	0.0267137	0	0	0	Unknown protein
Solyc00g047200	0.00968733	0	0	0.0272547	0.018986	0.0138607	0.0116677	0	Cytochrome b (AHRD V3.3 *-* A0A2G3ARK2_CAPCH)
Solyc00g049210	0.003585	0	0.00676133	0.00353267	0.0501667	0.002844	0.0171463	0.00342567	Cytochrome c biogenesis FN (AHRD V3.3 *** A0A0C5B9X0_9SOLA)
Solyc00g049220	0	0	0	0	0.00202667	0	0	0	(R)-mandelonitrile lyase-like (AHRD V3.3 *-* A0A2G2VFL1_CAPBA)
Solyc00g052430	0	0	0	0	0	0	0.0138583	0	Cytochrome c biogenesis FC (AHRD V3.3 *** A0A0C5B7H6_9SOLA)
Solyc00g052530	0	0	0	0	0	0	0	0	Unknown protein
Solyc00g052540	0	0	0	0	0	0	0	0	Unknown protein
Solyc00g069880	0	0	0	0	0	0	0	0	Photosystem II CP43 reaction center protein (AHRD V3.3 *-* A0A2G2YCL7_CAPAN)
Solyc00g072800	0	0	0	0	0.0286067	0.007439	0.00226667	0	Unknown protein
Solyc00g076250	0	0	0	0	0	0	0	0	Aminotransferase-like, plant mobile domain-containing protein (AHRD V3.3 *-* A0A103XKK0_CYNCS)
Solyc00g094520	0.02444	0.319976	0.153935	0.408732	0.670279	0.415103	0.465745	0.151828	orf100 (mitochondrion) (AHRD V3.3 *** YP_005090391.1)
Solyc00g094530	0.0422523	0.0497837	0.118945	0	0.229192	0	0.0965653	0.0466417	NADH-ubiquinone oxidoreductase chain 1 (AHRD V3.3 *** A0A2G2XVU5_CAPAN)
Solyc00g094540	0.0468357	0.145313	0.053396	0	0.253273	0.0230353	0	0	Unknown protein
Solyc00g094550	0	0	0.0238193	0	0.139529	0	0.00628967	0	hypothetical protein (AHRD V3.3 *-* AT2G07628.1)
Solyc00g112190	0	0	0	0	0	0	0	0	Unknown protein
Solyc00g118680	0.0488813	0	0	0	0.0505293	0	0	0.099017	Unknown protein
Solyc00g118690	0.346569	0.219229	0.347054	0.193824	0.464734	0.59499	0.605207	0.390687	NADH-ubiquinone oxidoreductase chain 1 (AHRD V3.3 *-* A0A2G2YI85_CAPAN)
Solyc00g125980	1.60365	2.08452	1.02358	0.757915	2.49837	1.68349	2.95741	2.89717	NADH dehydrogenase subunit (AHRD V3.3 -** A0A2K3PKA7_TRIPR)
Solyc00g125990	0.0698513	0.060471	0.0298177	0.0430137	0.191146	0.101259	0.148061	0.0605977	NADH dehydrogenase subunit 2 (AHRD V3.3 *** A0A0C5B2A9_HYONI)
Solyc00g126000	0.409781	0.713771	0.592186	0.393231	0.828571	0.681461	1.31005	0.889626	orf300 gene product (mitochondrion) (AHRD V3.3 *-* NP_064003.1)
Solyc00g126010	0.54276	0.649735	0.157142	0.264566	1.022	0.896865	0.927138	0.564252	LOW protein: NADH-ubiquinone oxidoreductase chain-like protein (AHRD V3.3 *-* ATMG01330.1)
Solyc00g142160	0.0121127	0.0500223	0	0	0.139664	0.0735507	0.112304	0.093891	RNA-dependent RNA polymerase (AHRD V3.3 *-* A0A2Z6JIR4_9VIRU)
Solyc00g142170	0	0	0	0	0.0201107	0	0.0409387	0.000385333	RNA-dependent RNA polymerase (AHRD V3.3 *-* A0A2Z6JIR4_9VIRU)
Solyc00g153980	0	0	0	0	0.00184233	0.0121417	0	0	Unknown protein
Solyc00g164580	0	0	0	0	0	0	0	0	Unknown protein
Solyc00g180440	0.146036	0.107978	0.0498877	0.050638	0.345523	0.109857	0.0271107	0.0362803	50S ribosomal protein L20, chloroplastic (AHRD V3.3 *** A0A1Z2RRT5_9ERIC)
Solyc00g181240	0	0	0	0	0.0182147	0	0.0185943	0.0289663	Unknown protein
Solyc00g181250	0	0	0.0230927	0.0223737	0.071162	0	0.0205957	0	Photosystem II CP43 reaction center protein (AHRD V3.3 *-* A0A2G2V3B6_CAPBA)
Solyc00g198360	0	0	0	0	0	0	0	0	Zinc finger transcription factor 4
Solyc00g210860	0	0	0.0216997	0.023957	0.022854	0	0	0	Unknown protein
Solyc00g230060	0	0	0	0	0	0	0	0	Ribonuclease H protein (AHRD V3.3 *-* A0A2I0WBN4_9ASPA)
Solyc00g230070	0.016573	0	0.02535	0	0.0266407	0	0	0.048711	Photosystem II CP43 reaction center protein (AHRD V3.3 *-* A0A220NAN4_9BRAS)
Solyc00g230080	0	0	0	0	0.0695427	0.00709767	0.00363433	0.0117193	Photosystem II protein D2 (AHRD V3.3 *** A0A0K0N7Y1_9LILI)
Solyc00g244280	0.0461127	0.047597	0.0919737	0.017722	0.0803353	0.0607303	0.120506	0.0960703	senescence-associated carboxylesterase 101-like isoform X3 (AHRD V3.3 *-* XP_024928153.1)
Solyc00g244290	0.581728	0.56883	0.579971	0.284553	1.00101	1.13042	1.51491	0.981465	NADH dehydrogenase subunit 2 (AHRD V3.3 *-* A0A0C5B2A9_HYONI)
Solyc00g244300	1.79701	1.97167	1.00511	0.889257	2.48101	2.45188	4.20491	3.226	Unknown protein
Solyc00g254910	0.009832	0	0	0	0.0240173	0	0	0	Auxin-responsive GH3 family protein (AHRD V3.3 *-* A0A2U1NZC8_ARTAN)
Solyc00g266110	0	0	0	0	0	0	0	0	Auxin-responsive GH3 family protein (AHRD V3.3 *-* A0A2U1NZC8_ARTAN)
Solyc00g277510	1.27757	0.973759	0.743003	0.314805	0.388954	0.149832	0.0766737	0.116109	Photosystem II protein D1 (AHRD V3.3 *-* A0A1U8QBZ9_CAPAN)
Solyc00g281110	0	0	0	0	0.0920743	0.015176	0	0	Unknown protein
Solyc00g284510	0	0	0	0	0	0	0	0	zinc finger CCCH domain-containing protein 6-like isoform X2 (AHRD V3.3 *-* A0A2I4DEC7_9ROSI)
Solyc00g308530	0	0	0	0	0	0	0	0	Unknown protein
Solyc00g309530	0	0	0	0	0	0	0	0	Unknown protein
Solyc00g316530	0.173981	0.145831	0.289963	0.11467	0.669233	0.297108	0.435762	0.145147	ATP synthase subunit beta, mitochondrial (AHRD V3.3 *-* A0A2G2V6Z5_CAPBA)
Solyc00g320430	0	0.035769	0	0	0.0885117	0.023462	0.00646033	0	Unknown protein
Solyc00g322630	0	0	0	0	0	0	0	0	Auxin-responsive GH3 family protein (AHRD V3.3 *-* A0A2U1NZC8_ARTAN)
Solyc00g500001	0	0	0	0	0	0	0	0	Retrovirus-related Pol polyprotein from transposon TNT 1-94 (AHRD V3.3 *-* A0A2I0VJ33_9ASPA)
Solyc00g500002	0	0	0	0	0	0	0	0	Retrovirus-related Pol polyprotein from transposon TNT 1-94 (AHRD V3.3 *-* A0A2I0VBY8_9ASPA)
Solyc00g500003	0	0	0	0	0	0	0	0	MP domain-containing protein (AHRD V3.3 *-* A0A1Q3D0H5_CEPFO)
Solyc00g500004	0	0	0	0	0	0	0	0	Unknown protein
Solyc00g500005	0	0	0	0	0	0	0	0	Unknown protein
Solyc00g500006	0	0	0	0	0	0	0	0	Unknown protein
Solyc00g500007	0	0	0	0	0	0	0	0	Unknown protein
Solyc00g500008	0	0	0	0	0	0	0	0	Unknown protein
Solyc00g500009	0	0	0	0	0	0	0	0	Unknown protein
Solyc00g500010	0	0	0	0	0	0	0	0	Unknown protein
Solyc00g500011	0	0	0	0	0	0	0	0	Unknown protein
Solyc00g500012	0	0	0	0	0	0	0	0	Unknown protein
Solyc00g500013	0	0	0	0	0	0	0	0	Unknown protein
Solyc00g500014	0	0	0	0	0	0	0	0	Unknown protein
Solyc00g500015	0	0	0	0	0	0	0	0	Unknown protein
Solyc00g500016	0	0	0	0	0	0	0	0	Unknown protein
Solyc00g500017	0	0	0	0	0	0	0	0	Unknown protein
Solyc00g500018	0	0	0	0	0	0	0	0	Unknown protein
Solyc00g500019	0	0	0	0.0775717	0.10639	0	0	0	Photosystem I assembly protein Ycf4 (AHRD V3.3 *** K4EQH2_DATST)
Solyc00g500020	0	0.0896223	0	0	0	0	0	0	Cytochrome f (AHRD V3.3 *** A0A2G3ALJ3_CAPAN)
Solyc00g500021	0	0	0	0	0	0	0	0	Cytochrome b559 subunit alpha (AHRD V3.3 *** S8D1L1_9LAMI)
Solyc00g500022	0.947226	0.911013	0.449148	0.33754	0.344072	0.155178	0.218387	0.178049	30S ribosomal protein S18, chloroplastic (AHRD V3.3 *** A0A1U8QD82_CAPAN)
Solyc00g500023	0	0	0	0	0	0	0	0	ATP-dependent Clp protease proteolytic subunit (AHRD V3.3 *** CLPP_SOLTU)
Solyc00g500024	0.407431	0.494847	0.092504	0.114497	0.123662	0.0220213	0.061747	0.0649003	Photosystem II CP47 reaction center protein (AHRD V3.3 *** A0A1U8QCF6_CAPAN)
Solyc00g500025	0	0	0	0	0	0	0	0	Unknown protein
Solyc00g500026	0	0	0	0	0	0	0	0	Photosystem II reaction center protein H (AHRD V3.3 *** I6N985_DATST)
Solyc00g500027	0.299202	0.202687	0.106412	0.0653383	0.107642	0.0246103	0.029086	0.0419963	Cytochrome b6 (AHRD V3.3 *** A0A125RTD6_9ASTR)
Solyc00g500028	0	0	0	0	0	0	0	0	Cytochrome b6-f complex subunit 4 (AHRD V3.3 *** A0A2G2XBM1_CAPBA)
Solyc00g500029	0.106986	0.254084	0.138186	0.0612957	0.0773963	0.0529473	0	0	30S ribosomal protein S2, chloroplastic (AHRD V3.3 *** I6N946_DATST)
Solyc00g500030	0.501814	0.365849	0.28273	0.0838623	0.076797	0.0185213	0.0329847	0.0207987	30S ribosomal protein S11, chloroplastic (AHRD V3.3 *** G9FCH9_9LAMI)
Solyc00g500031	0.380984	0.394843	0.150525	0.0787487	0.411287	0.0730083	0.0916353	0.0651417	50S ribosomal protein L14, chloroplastic (AHRD V3.3 *** I6N992_DATST)
Solyc00g500032	0.810227	0.88722	0.407649	0.226072	0.77203	0.165286	0.149843	0.271174	50S ribosomal protein L16, chloroplastic (AHRD V3.3 *-* A0A2G3BL23_CAPCH)
Solyc00g500033	0	0	0	0	0	0	0	0	Ribosomal protein L2, plastid (AHRD V3.3 *-* A0A2U1PJW3_ARTAN)
Solyc00g500034	0	0	0	0	0	0	0	0	30S ribosomal protein S3, chloroplastic (AHRD V3.3 *** I6N994_DATST)
Solyc00g500035	1.82282	2.47025	0.906291	1.06208	0.594427	0.68895	0.718084	0.67213	50S ribosomal protein L2 (AHRD V3.3 *** H6T990_9CARY)
Solyc00g500036	1.34235	1.59985	0.582103	0.620375	0.503722	0.476908	0.359837	0.275085	Ycf15 (AHRD V3.3 *-* A0A346JLD3_9ASTE)
Solyc00g500037	0	0	0	0	0	0	0	0	Protein Ycf2 (AHRD V3.3 *** A0A1Z1GA65_LITCN)
Solyc00g500038	0	0	0	0	0	0	0	0	Ycf15 protein (AHRD V3.3 *-* J7H9P3_CAPAN)
Solyc00g500039	0	0	0	0	0	0	0	0	Ycf15 (AHRD V3.3 *-* A0A346JLD3_9ASTE)
Solyc00g500040	0	0	0	0	0	0	0	0	Protein TIC 214 (AHRD V3.3 *-* K4EQH9_DATST)
Solyc00g500041	0	0	0	0	0	0	0	0	NAD(P)H-quinone oxidoreductase subunit 1, chloroplastic (AHRD V3.3 *** A0A2G2XBN0_CAPBA)
Solyc00g500042	0.117273	0.113851	0.0345167	0.0292113	0.054865	0.0212353	0.0286837	0.0335097	Protein TIC 214 (AHRD V3.3 *** TI214_SOLTU)
Solyc00g500043	0	0	0	0	0	0	0	0	Protein TIC 214 (AHRD V3.3 *-* TI214_SOLTU)
Solyc00g500044	0	0	0	0	0	0	0	0	30S ribosomal protein S2, chloroplastic (AHRD V3.3 *** I6N946_DATST)
Solyc00g500045	0	0	0	0	0	0	0	0	Ycf15 protein (AHRD V3.3 *-* J7H9P3_CAPAN)
Solyc00g500046	0	0	0	0	0	0	0	0	Protein Ycf2 (AHRD V3.3 *** A0A1Z1GA65_LITCN)
Solyc00g500047	0	0	0	0	0	0	0	0	50S ribosomal protein L2, chloroplastic (AHRD V3.3 *** A0A1C8V6E3_9ROSI)
Solyc00g500048	0	0	0	0	0	0	0	0	Maturase K (AHRD V3.3 *** A0A2G3DGH8_CAPCH)
Solyc00g500049	0	0	0.110634	0	0	0	0	0	Photosystem II reaction center protein K (AHRD V3.3 *** A0A1U8QD48_CAPAN)
Solyc00g500050	2.4455	2.27639	0.431865	0.470543	0.181331	0.107624	0.12857	0.117408	ATP synthase subunit alpha, chloroplastic (AHRD V3.3 *** I6N942_DATST)
Solyc00g500051	0	0	0	0	0	0	0	0	30S ribosomal protein S2, chloroplastic (AHRD V3.3 *** I6N946_DATST)
Solyc00g500052	0	0	0	0	0.00198533	0	0	0	DNA-directed RNA polymerase subunit beta'' (AHRD V3.3 *-* A0A1U8QCC7_CAPAN)
Solyc00g500053	0.009401	0	0.0229307	0	0.0410293	0.00381033	0.00673133	0	DNA-directed RNA polymerase subunit beta (AHRD V3.3 *-* I6N949_DATST)
Solyc00g500054	0	0	0	0	0	0	0	0	Photosystem II CP43 reaction center protein (AHRD V3.3 *** A0A078EKT7_BRANA)
Solyc00g500055	0.270727	0	0	0.0200263	0.055272	0	0	0	30S ribosomal protein S14, chloroplastic (AHRD V3.3 *-* A0A2G2X601_CAPBA)
Solyc00g500056	0.155247	0.133615	0.059302	0.0380173	0.0599287	0.028983	0.0126357	0.0165757	DNA-directed RNA polymerase subunit alpha (AHRD V3.3 *-* A0A1U8QD90_CAPAN)
Solyc00g500057	0.20222	0	0	0.00239333	0.0398817	0	0	0	Photosystem I P700 chlorophyll a apoprotein A1 (AHRD V3.3 *** K4EPK3_DATST)
Solyc00g500058	0	0	0	0	0	0	0	0	Photosystem I assembly protein Ycf3 (AHRD V3.3 *** A0A140F954_9LAMI)
Solyc00g500059	0	0	0	0	0	0	0	0	Photosystem I assembly protein Ycf3 (AHRD V3.3 *-* A0A1S5SJS5_ORYVI)
Solyc00g500060	0.540916	0.670898	0.181951	0.0638103	0.262111	0.195788	0.155941	0.141373	30S ribosomal protein S4, chloroplastic (AHRD V3.3 *** I6N958_DATST)
Solyc00g500061	0.688483	0.486808	0.224744	0.127328	0.156101	0.0605297	0.050493	0.0452773	Photosystem I assembly protein Ycf4 (AHRD V3.3 *** K4EQH2_DATST)
Solyc00g500062	3.50611	2.29789	0.37045	0.271403	0.511792	0.147372	0.223054	0.213736	NAD(P)H-quinone oxidoreductase subunit K, chloroplastic (AHRD V3.3 *** A0A1U8QCE3_CAPAN)
Solyc00g500063	11.8261	11.8491	3.13904	3.65873	2.23049	1.22134	1.11013	1.11272	Ribulose bisphosphate carboxylase large chain (AHRD V3.3 *** A0A2G2Z7Q2_CAPAN)
Solyc00g500064	0	0	0	0	0	0	0	0	Ycf15 (AHRD V3.3 *-* A0A346JLD3_9ASTE)
Solyc00g500065	0.174566	0.227081	0.118165	0	0.559595	0.114332	0	0.031404	Acetyl-coenzyme A carboxylase carboxyl transferase subunit beta, chloroplastic (AHRD V3.3 *** ACCD_SOLLC)
Solyc00g500066	0.611231	0.385364	0.223141	0.0646297	0.266962	0.0420323	0.0244577	0	Photosystem I assembly protein Ycf4 (AHRD V3.3 *** K4EQH2_DATST)
Solyc00g500067	0.250074	0.242842	0.0424217	0	0	0	0.0137233	0	NAD(P)H-quinone oxidoreductase subunit K, chloroplastic (AHRD V3.3 *** A0A1U8QCE3_CAPAN)
Solyc00g500068	10.5076	12.5327	3.30766	2.63736	0	1.05665	2.94959	0.825952	Cytochrome b559 subunit alpha (AHRD V3.3 *** S8D1L1_9LAMI)
Solyc00g500069	0	0	0	0	0	0	0	0	30S ribosomal protein S12, chloroplastic (AHRD V3.3 *** A0A2S1JZH6_9APIA)
Solyc00g500070	0.627665	0.415524	0.0547377	0.350533	0.301019	0	0.235271	0.15976	ATP-dependent Clp protease proteolytic subunit (AHRD V3.3 *** CLPP_SOLTU)
Solyc00g500071	0.410984	0.477249	0.0925827	0.116668	0.127884	0.022214	0.0580907	0.0649797	Photosystem II CP43 reaction center protein (AHRD V3.3 *** A0A078EKT7_BRANA)
Solyc00g500072	0	0	0	0	0	0	0	0	Ycf15 (AHRD V3.3 *-* A0A346JLD3_9ASTE)
Solyc00g500073	0.122439	0	0	0	0	0	0	0	Cytochrome b559 subunit alpha (AHRD V3.3 *** S8D1L1_9LAMI)
Solyc00g500074	0.140153	0.288262	0.167907	0.0571057	0.10905	0.0640207	0	0	DNA-directed RNA polymerase subunit alpha (AHRD V3.3 *-* A0A1U8QD90_CAPAN)
Solyc00g500075	0.547904	0.367108	0.273759	0.0953067	0.0929447	0.015727	0.0267537	0.0222623	30S ribosomal protein S11, chloroplastic (AHRD V3.3 *** G9FCH9_9LAMI)
Solyc00g500076	0.4217	0.400615	0.165971	0.081619	0.415681	0.066688	0.088729	0.103506	50S ribosomal protein L14, chloroplastic (AHRD V3.3 *** I6N992_DATST)
Solyc00g500077	0.688583	0.936368	0.40076	0.253064	0.777778	0.176171	0.162192	0.24663	50S ribosomal protein L16, chloroplastic (AHRD V3.3 *-* A0A2G3BL23_CAPCH)
Solyc00g500078	0	0	0.0120073	0.27133	0	0	0	0	Ribosomal protein L2, plastid (AHRD V3.3 *-* A0A2U1PJW3_ARTAN)
Solyc00g500079	2.89301	3.31214	1.16704	1.37991	0.78188	0.927685	1.01545	0.805271	50S ribosomal protein L2 (AHRD V3.3 *** H6T990_9CARY)
Solyc00g500080	3.27963	3.86721	1.5858	1.60854	1.13765	1.04652	0.900646	0.857322	Photosystem I assembly protein Ycf4 (AHRD V3.3 *** K4EQH2_DATST)
Solyc00g500081	0	0	0	0	0	0	0	0	Protein Ycf2 (AHRD V3.3 *** A0A1Z1GA65_LITCN)
Solyc00g500082	0.0600217	0	0	0	0	0	0	0	30S ribosomal protein S11, chloroplastic (AHRD V3.3 *** G9FCH9_9LAMI)
Solyc00g500083	0	3.7719	0	0	0	0	0	0	Ycf15 (AHRD V3.3 *-* A0A346JLD3_9ASTE)
Solyc00g500084	0.0586693	0.048721	0.0300727	0.00501467	0.081596	0.00374167	0.00766233	0.00941533	Protein TIC 214 (AHRD V3.3 *** K4EQH9_DATST)
Solyc00g500085	0.24551	0.295611	0.171197	0.131626	0.0511007	0.0762883	0.0153033	0.022109	Cytochrome c biogenesis protein CcsA (AHRD V3.3 *** A0A1U8QCK2_CAPAN)
Solyc00g500086	0.067199	0.0128533	0.044577	0	0.065468	0.0211103	0	0	Photosystem I assembly protein Ycf3 (AHRD V3.3 *** A0A140F954_9LAMI)
Solyc00g500087	0.0781537	0.0546603	0.116047	0.001092	0.197309	0.0355197	0.0397907	0.0131257	NAD(P)H-quinone oxidoreductase subunit H, chloroplastic (AHRD V3.3 *** A0A1U8QCJ3_CAPAN)
Solyc00g500088	0.0594393	0.040069	0.0248747	0.00945333	0.0581823	0.021743	0.0237373	0.0154263	Protein TIC 214 (AHRD V3.3 *** TI214_SOLTU)
Solyc00g500089	0	0	0	0	0	0	0	0	Unknown protein
Solyc00g500090	0	0	0	0	0	0	0	0	MP domain-containing protein (AHRD V3.3 *** A0A1Q3CUC2_CEPFO)
Solyc00g500091	0	0	0	0.039184	0	0	0	0	E3 ubiquitin-protein ligase (AHRD V3.3 *** A0A2G3CLG0_CAPCH)
Solyc00g500092	0	0	0	0	0	0	0	0	B3 domain-containing protein (AHRD V3.3 *** A0A2K3PAY3_TRIPR)
Solyc00g500093	0	0	0	0	0	0	0	0	B3 domain-containing protein (AHRD V3.3 *-* A0A1Q3DFU3_CEPFO)
Solyc00g500094	0	0	0	0	0	0	0	0	Retrovirus-related Pol polyprotein from transposon TNT 1-94 (AHRD V3.3 *-* A0A2K3MQM8_TRIPR)
Solyc00g500095	0	0	0	0	0	0	0	0	Phenylalanine ammonia-lyase (AHRD V3.3 *** A0A2G2VZP0_CAPBA)
Solyc00g500096	0.0153057	0	0	0.0168393	0	0	0	0	E3 ubiquitin-protein ligase (AHRD V3.3 *** A0A2G2WYW6_CAPBA)
Solyc00g500097	0	0	0	0	0	0	0	0	B3 domain-containing protein At1g49475-like (AHRD V3.3 *-* XP_025886111.1)
Solyc00g500098	0.0126117	0.0283057	0.0468197	0.00907367	0.138037	0.0210573	0.031999	0.0249197	NADH-ubiquinone oxidoreductase chain 5 (AHRD V3.3 *** A0A0C5ARN6_HYONI)
Solyc00g500099	0.0828863	0.0225253	0.020515	0	0.271849	0.0537523	0.0393737	0.0602923	Cytochrome C oxidase subunit II-like%2C transmembrane domain-containing protein (AHRD V3.3 *** ATMG01280.1)
Solyc00g500100	0	0	0	0	0	0	0	0	Ribosomal protein S3 (AHRD V3.3 *** A0A290WKX3_SOLLC)
Solyc00g500101	0.00751867	0.0298207	0.0107683	0.00879567	0.045538	0.00648067	0.0144277	0.00800433	Cytochrome c oxidase subunit 2 (AHRD V3.3 *-* A0A0C5B2A3_HYONI)
Solyc00g500102	0.023025	0.029604	0.031532	0	0.098311	0.016271	0.032862	0.0143393	Cytochrome c oxidase subunit 2 (AHRD V3.3 *-* A0A0C5B2A3_HYONI)
Solyc00g500103	0.032341	0	0	0	0.464338	0.00578133	0	0.0232113	NADH-ubiquinone oxidoreductase chain 5 (AHRD V3.3 *-* A0A0C5ARN6_HYONI)
Solyc00g500104	0.0646283	0.0926383	0.0753077	0.011991	0.253749	0.0955353	0.0666727	0.0445013	RNA-dependent RNA polymerase (AHRD V3.3 *-* A0A2Z6JIR4_9VIRU)
Solyc00g500105	0.0814373	0.0582583	0.0961237	0.0366597	0.184756	0.09908	0.306035	0.117117	Transmembrane protein (AHRD V3.3 *-* A0A1P8B2M8_ARATH)
Solyc00g500106	0	0	0	0	0	0	0	0	Pyruvate, phosphate dikinase (AHRD V3.3 *-* A0A2U1QB44_ARTAN)
Solyc00g500107	0	0	0	0	0	0	0	0	Peptidase S10, serine carboxypeptidase, Alpha/Beta hydrolase fold protein (AHRD V3.3 *-* A0A2U1LQP4_ARTAN)
Solyc00g500108	0	0	0	0	0	0	0	0	Unknown protein
Solyc00g500109	0	0	0	0	0.00580133	0	0	0	Unknown protein
Solyc00g500110	0	0	0	0	0	0	0	0	Unknown protein
Solyc00g500111	0	0	0.114837	0	0.109197	0	0	0	NADH dehydrogenase subunit 5 (AHRD V3.3 *-* A0A0C5B7L0_9SOLA)
Solyc00g500112	0	0	0	0	0	0	0	0	NADH-ubiquinone oxidoreductase chain 5 (AHRD V3.3 *-* A0A0C5ARN6_HYONI)
Solyc00g500113	0	0	0	0	0	0	0	0	Ribosomal protein S13 (AHRD V3.3 *** K4D8U2_SOLLC)
Solyc00g500114	0	0	0	0	0	0	0	0	Transmembrane protein (AHRD V3.3 *** Q3EC50_ARATH)
Solyc00g500115	0	0	0	0	0	0	0	0	NADH-ubiquinone oxidoreductase chain 3 (AHRD V3.3 *** A0A2G2V3C2_CAPBA)
Solyc00g500116	0.010759	0.012099	0.006389	0	0.055692	0.0103893	0.00200667	0.0154023	Cytochrome C oxidase subunit II-like%2C transmembrane domain-containing protein (AHRD V3.3 *** ATMG01280.1)
Solyc00g500117	0	0	0.0195953	0	0.0188773	0	0	0	Ribosomal protein S3 (AHRD V3.3 *** A0A290WKX3_SOLLC)
Solyc00g500118	0.0217583	0.0442897	0.026378	0.007832	0.0675447	0.00512333	0.018263	0.010816	Cytochrome c oxidase subunit 2 (AHRD V3.3 *** A0A2G2X686_CAPBA)
Solyc00g500119	0.0373257	0.0573897	0.0479797	0	0.157684	0.0124543	0.0290693	0.0271703	Cytochrome c oxidase subunit 2 (AHRD V3.3 *-* A0A0C5B2A3_HYONI)
Solyc00g500120	0	0	0	0	0	0	0	0	Unknown protein
Solyc00g500121	0	0	0	0	0	0	0	0	Unknown protein
Solyc00g500122	0	0	0	0	0	0	0	0	Unknown protein
Solyc00g500123	0.00966567	0.009181	0.0292527	0	0.0456037	0	0	0	NAD(P)H-quinone oxidoreductase subunit 1, chloroplastic (AHRD V3.3 *** A0A2G2XBN0_CAPBA)
Solyc00g500124	0.0512037	0.0371437	0.0701183	0.001113	0.121286	0.0239147	0.0235923	0.00660033	NAD(P)H-quinone oxidoreductase subunit H, chloroplastic (AHRD V3.3 *** A0A1U8QCJ3_CAPAN)
Solyc00g500125	0	0	0	0	0	0	0	0	Protein TIC 214 (AHRD V3.3 *** TI214_SOLTU)
Solyc00g500126	0	0	0	0	0	0	0	0	Protein TIC 214 (AHRD V3.3 *-* TI214_SOLTU)
Solyc00g500127	0	0	0	0	0	0	0	0	50S ribosomal protein L14, chloroplastic (AHRD V3.3 *** I6N992_DATST)
Solyc00g500128	0	0	0	0	0	0	0	0	30S ribosomal protein S14, chloroplastic (AHRD V3.3 *-* A0A2G2X601_CAPBA)
Solyc00g500129	1.1075	3.61825	0.841185	0.367266	0.273801	0.641595	0.705659	0.444619	Ribosomal protein L2, plastid (AHRD V3.3 *-* A0A2U1PJW3_ARTAN)
Solyc00g500130	1.52184	1.0743	0.70743	0.293888	0.362887	0.134232	0.0857583	0.0907183	Photosystem II protein D1 (AHRD V3.3 *** A0A1U8QBZ9_CAPAN)
Solyc00g500131	0	0	0	0.022423	0.0479373	0	0	0	Maturase K (AHRD V3.3 *** A0A2G3DGH8_CAPCH)
Solyc00g500132	0	0	0	0	0	0	0	0	Photosystem II reaction center protein K (AHRD V3.3 *** A0A1U8QD48_CAPAN)
Solyc00g500133	4.00464	3.56301	0.661243	0.745595	0.312606	0.198157	0.20446	0.207357	ATP synthase subunit alpha, chloroplastic (AHRD V3.3 *** I6N942_DATST)
Solyc00g500134	0	0	0	0	0.0580547	0	0	0	30S ribosomal protein S2, chloroplastic (AHRD V3.3 *** I6N946_DATST)
Solyc00g500135	0	0.00645867	0	0.004913	0.0295807	0.00593567	0	0	DNA-directed RNA polymerase subunit beta'' (AHRD V3.3 *-* A0A1U8QCC7_CAPAN)
Solyc00g500136	0	0.213994	0	0	0	0.02706	0	0	Photosystem II CP43 reaction center protein (AHRD V3.3 *** A0A078EKT7_BRANA)
Solyc00g500137	0.284141	0	0	0.0200263	0.055272	0	0	0	30S ribosomal protein S14, chloroplastic (AHRD V3.3 *-* A0A2G2X601_CAPBA)
Solyc00g500138	0.165435	0.133615	0.059302	0.0380173	0.0599287	0.028983	0.0126357	0.0165757	50S ribosomal protein L14, chloroplastic (AHRD V3.3 *** I6N992_DATST)
Solyc00g500139	0.1223	0	0	0.00276067	0.043407	0	0	0	Photosystem I P700 chlorophyll a apoprotein A1 (AHRD V3.3 *** K4EPK3_DATST)
Solyc00g500140	3.71878	3.60791	1.1038	0.950727	0.50804	0.446679	0.39658	0.185492	ATP synthase epsilon chain, chloroplastic (AHRD V3.3 *** A0A1U8QCD5_CAPAN)
Solyc00g500141	0	0	0	0	0	0	0	0	Protein Ycf2 (AHRD V3.3 *-* A0A1W5PW46_9DIPS)
Solyc00g500142	0	0	0	0	0.0605893	0	0	0	NAD(P)H-quinone oxidoreductase subunit J, chloroplastic (AHRD V3.3 *** A0A1U8QD64_CAPAN)
Solyc00g500143	0.0572267	0.0379583	0.0440247	0.00385633	0.006542	0.0118313	0.00576233	0.00387067	30S ribosomal protein S4, chloroplastic (AHRD V3.3 *** I6N958_DATST)
Solyc00g500144	0	0	0	0	0	0	0	0	30S ribosomal protein S14, chloroplastic (AHRD V3.3 *-* A0A2G2X601_CAPBA)
Solyc00g500145	0	0	0	0	0	0	0	0	Maturase K (AHRD V3.3 *** A0A2G3DGH8_CAPCH)
Solyc00g500146	0.0884707	0.0797097	0.0253313	0.0168613	0.019006	0.00345967	0.00494167	0.00476267	NAD(P)H-quinone oxidoreductase subunit 2, chloroplastic (AHRD V3.3 *-* J7H400_CAPAN)
Solyc00g500147	0	0	0	0	0	0	0	0	Protein Ycf2 (AHRD V3.3 *-* A0A0U1ZJJ5_9SOLN)
Solyc00g500148	0	0	0	0	0	0	0	0	Protein Ycf2 (AHRD V3.3 *-* A0A1W5PW46_9DIPS)
Solyc00g500149	0	0	0	0	0	0	0	0	NAD(P)H-quinone oxidoreductase subunit J, chloroplastic (AHRD V3.3 *** A0A1U8QD64_CAPAN)
Solyc00g500150	0	0	0	0	0	0	0	0	50S ribosomal protein L2, chloroplastic (AHRD V3.3 *** I6N9C2_DATST)
Solyc00g500151	0	0	0	0	0	0	0	0	Photosystem II protein D1 (AHRD V3.3 *** A0A1U8QBZ9_CAPAN)
Solyc00g500152	0.337394	0.444758	0.103166	0.107261	0.057846	0.0704197	0.0847847	0.068538	50S ribosomal protein L2 (AHRD V3.3 *** H6T990_9CARY)
Solyc00g500153	0	0	0	0	0	0	0	0	30S ribosomal protein S3, chloroplastic (AHRD V3.3 *** A0A1U8QD95_CAPAN)
Solyc00g500154	0	0	0	0	0	0	0	0	NAD(P)H-quinone oxidoreductase subunit J, chloroplastic (AHRD V3.3 *** A0A1U8QD64_CAPAN)
Solyc00g500155	0.01328	0	0	0	0	0	0	0.031878	50S ribosomal protein L14, chloroplastic (AHRD V3.3 *** I6N992_DATST)
Solyc00g500156	0.00895333	0	0	0	0	0	0	0	30S ribosomal protein S11, chloroplastic (AHRD V3.3 *** G9FCH9_9LAMI)
Solyc00g500157	0	0	0	0	0	0	0	0	Protein Ycf2 (AHRD V3.3 *-* A0A1W5PW46_9DIPS)
Solyc00g500158	0.014297	0.019408	0.0102447	0	0.00281667	0	0	0	Cytochrome b6-f complex subunit 4 (AHRD V3.3 *** A0A2G2XBM1_CAPBA)
Solyc00g500159	0	0	0	0	0	0	0	0	Unknown protein
Solyc00g500160	0	0	0	0	0	0	0	0	Retrovirus-related Pol polyprotein from transposon TNT 1-94 (AHRD V3.3 *-* A0A2I0W6G5_9ASPA)
Solyc00g500161	0	0	0	0	0	0	0	0	Unknown protein
Solyc00g500162	0	0	0	0	0	0	0	0	Unknown protein
Solyc00g500163	0	0	0	0	0	0	0	0	Unknown protein
Solyc00g500164	0	0	0	0	0	0	0	0	Unknown protein
Solyc00g500165	0	0	0	0	0	0	0	0	Unknown protein
Solyc00g500166	0	0	0	0	0	0	0	0	Unknown protein
Solyc00g500167	0	0	0	0	0	0	0	0	Cytochrome c biogenesis FC (AHRD V3.3 *-* A0A0C5APX0_HYONI)
Solyc00g500168	0	0	0	0	0	0	0	0	Transport membrane protein (AHRD V3.3 *** A0A0C5ARU2_HYONI)
Solyc00g500169	0.074262	0.065973	0.107051	0.0298157	0.243632	0.0963677	0.178911	0.120559	NADH-ubiquinone oxidoreductase chain 5 (AHRD V3.3 *** A0A0C5ARN6_HYONI)
Solyc00g500170	0	0	0	0	0	0	0	0	Cytochrome C oxidase subunit II-like%2C transmembrane domain-containing protein (AHRD V3.3 *** ATMG01280.1)
Solyc00g500171	0.00808933	0.0263283	0	0.0114533	0.0445517	0.012113	0.0187827	0.0349	NADH-ubiquinone oxidoreductase chain 4 (AHRD V3.3 *** A0A2G3CZD8_CAPCH)
Solyc00g500172	0.00833433	0.013132	0.006885	0.000523	0.0434287	0.0436683	0.029129	0.0244973	NADH-ubiquinone oxidoreductase chain 4 (AHRD V3.3 *** A0A2G2X0J9_CAPBA)
Solyc00g500173	0	0	0	0	0	0	0	0	ATPase subunit 4 (AHRD V3.3 *** A0A0C5B288_HYONI)
Solyc00g500174	0	0	0	0	0	0	0	0	Unknown protein
Solyc00g500175	0	0	0	0	0	0	0	0	Unknown protein
Solyc00g500176	0	0	0	0	0	0	0	0	Unknown protein
Solyc00g500177	0	0	0	0	0	0	0	0	Unknown protein
Solyc00g500178	0	0	0	0	0	0	0	0	Unknown protein
Solyc00g500179	0	0	0	0	0	0	0	0	Unknown protein
Solyc00g500180	0	0	0	0	0	0	0	0	Unknown protein
Solyc00g500181	0	0	0	0	0	0	0	0	RNA-dependent RNA polymerase (AHRD V3.3 *** A0A2Z6JIR4_9VIRU)
Solyc00g500182	0.157239	0.124334	0.149489	0.077103	0.342037	0.169086	0.473663	0.211114	Transmembrane protein (AHRD V3.3 *-* A0A1P8B2M8_ARATH)
Solyc00g500183	0.460507	0.517913	0.42653	0.251303	0.868527	0.558711	0.994679	0.739602	NADH dehydrogenase subunit 7 (AHRD V3.3 *-* A0A220T1K3_9ROSI)
Solyc00g500184	0.216688	0.325626	0.226419	0.0532283	0.37827	0.229623	0.433997	0.144874	NADH dehydrogenase subunit 7 (AHRD V3.3 *** A0A0C5B9X5_9SOLA)
Solyc00g500185	0.278077	0.201673	0.260338	0.0870353	0.335437	0.269767	0.562954	0.25696	NADH dehydrogenase subunit 7 (AHRD V3.3 *-* G9FCP1_9LAMI)
Solyc00g500186	0.069663	0.0292073	0.0181743	0	0.150917	0.0215137	0.00787567	0.0145417	Cytochrome c oxidase subunit 1 (AHRD V3.3 *** A0A2G2YXI2_CAPAN)
Solyc00g500187	0	0	0	0	0	0.0244717	0	0	NADH-ubiquinone oxidoreductase chain 4 (AHRD V3.3 *-* A0A290WL40_SOLLC)
Solyc00g500188	0.0142383	0.0263283	0	0.0114533	0.0445517	0.0346753	0.0209483	0.0349	NADH-ubiquinone oxidoreductase chain 4 (AHRD V3.3 *** A0A2G3CZD8_CAPCH)
Solyc00g500189	0.00833433	0.013132	0.0145303	0.00142333	0.0717173	0.046393	0.0437333	0.0394503	NADH-ubiquinone oxidoreductase chain 4 (AHRD V3.3 *** A0A2G2X0J9_CAPBA)
Solyc00g500190	0	0	0	0	0	0	0	0	30S ribosomal protein S2, chloroplastic (AHRD V3.3 *** I6N946_DATST)
Solyc00g500191	0.022513	0.00842667	0.000270333	0	0.00398167	0.00448467	0.00603133	0	Protein TIC 214 (AHRD V3.3 *-* TI214_SOLTU)
Solyc00g500192	0.0447877	0.0361697	0.0636277	0.00112	0.10652	0.0206827	0.0184787	0.008575	NAD(P)H-quinone oxidoreductase subunit H, chloroplastic (AHRD V3.3 *** A0A1U8QCJ3_CAPAN)
Solyc00g500193	0.038057	0.0449633	0.0367183	0	0.0521467	0.0292237	0	0	NAD(P)H-quinone oxidoreductase subunit 1, chloroplastic (AHRD V3.3 *** A0A2G2XBN0_CAPBA)
Solyc00g500194	0.097376	0	0	0	0	0	0	0	Cytochrome c biogenesis protein CcsA (AHRD V3.3 *-* A0A1U8QCK2_CAPAN)
Solyc00g500195	0	0	0	0	0	0.00800167	0	0	NAD(P)H-quinone oxidoreductase subunit 5, chloroplastic (AHRD V3.3 *** J7H711_CAPAN)
Solyc00g500196	0	0	0	0	0	0	0	0	Protein TIC 214 (AHRD V3.3 *** K4EQH9_DATST)
Solyc00g500197	0	0	0	0	0	0	0	0	Ycf15 protein (AHRD V3.3 *-* J7H9P3_CAPAN)
Solyc00g500198	0	0	0	0	0	0	0	0	NAD(P)H-quinone oxidoreductase subunit 5, chloroplastic (AHRD V3.3 *** J7H711_CAPAN)
Solyc00g500199	0	0	0	0	0	0	0	0	Photosystem I P700 chlorophyll a apoprotein A1 (AHRD V3.3 *** K4EPK3_DATST)
Solyc00g500200	1.45676	1.05671	0.70343	0.302719	0.353924	0.134232	0.0857583	0.0907183	Photosystem II protein D1 (AHRD V3.3 *** A0A1U8QBZ9_CAPAN)
Solyc00g500201	0	0	0	0	0	0	0	0	Maturase K (AHRD V3.3 *** A0A2G3DGH8_CAPCH)
Solyc00g500202	0	0	0	0	0	0	0	0	Photosystem II reaction center protein K (AHRD V3.3 *** A0A1U8QD48_CAPAN)
Solyc00g500203	2.54726	2.35677	0.441042	0.476248	0.189623	0.118671	0.13548	0.128591	ATP synthase subunit alpha, chloroplastic (AHRD V3.3 *** I6N942_DATST)
Solyc00g500204	0	0	0	0	0	0	0	0	30S ribosomal protein S2, chloroplastic (AHRD V3.3 *** I6N946_DATST)
Solyc00g500205	0	0	0	0	0	0	0	0	DNA-directed RNA polymerase subunit beta'' (AHRD V3.3 *-* A0A1U8QCC7_CAPAN)
Solyc00g500206	0.179738	0.255724	0	0.1361	0.0505297	0.0245833	0	0.0475017	Photosystem II CP43 reaction center protein (AHRD V3.3 *** A0A078EKT7_BRANA)
Solyc00g500207	0.284141	0	0	0.0200263	0.055272	0	0	0	30S ribosomal protein S14, chloroplastic (AHRD V3.3 *-* A0A2G2X601_CAPBA)
Solyc00g500208	0.165435	0.133615	0.059302	0.0380173	0.0599287	0.028983	0.0126357	0.0165757	Photosystem I P700 chlorophyll a apoprotein A2 (AHRD V3.3 *** I6N956_DATST)
Solyc00g500209	0.230891	0	0	0.00239333	0.0398817	0	0	0	Photosystem I P700 chlorophyll a apoprotein A1 (AHRD V3.3 *** K4EPK3_DATST)
Solyc00g500210	0.0704303	0	0.118994	0	0	0	0.0455273	0.01801	Protein TIC 214 (AHRD V3.3 *** K4EQH9_DATST)
Solyc00g500211	0	0	0	0.0502973	0.102011	0	0	0	NAD(P)H-quinone oxidoreductase subunit 5, chloroplastic (AHRD V3.3 *** J7H711_CAPAN)
Solyc00g500212	0.638586	0.819789	0.231088	0.0788583	0.31681	0.236993	0.209452	0.187462	30S ribosomal protein S4, chloroplastic (AHRD V3.3 *** I6N958_DATST)
Solyc00g500213	0	0	0	0	0	0	0	0	Auxin-responsive GH3 family protein (AHRD V3.3 *** A0A2U1NZC8_ARTAN)
Solyc00g500214	0	0	0	0	0	0	0	0	Auxin-responsive GH3 family protein (AHRD V3.3 *** A0A2U1NZC8_ARTAN)
Solyc00g500215	0	0	0	0	0	0	0	0	Unknown protein
Solyc00g500216	0.0514333	0	0	0	0	0	0	0	Auxin-responsive GH3 family protein (AHRD V3.3 *** A0A2U1MJ34_ARTAN)
Solyc00g500217	0	0	0	0	0	0	0	0	Retrovirus-related Pol polyprotein from transposon TNT 1-94 (AHRD V3.3 *-* A0A2I0VJ33_9ASPA)
Solyc00g500218	0	0	0	0	0	0	0	0	Auxin-responsive GH3 family protein (AHRD V3.3 *** A0A2U1NZC8_ARTAN)
Solyc00g500219	0	0	0	0	0	0	0	0	B3 domain-containing protein (AHRD V3.3 *** A0A2K3PAY3_TRIPR)
Solyc00g500220	0	0	0	0	0	0	0	0	B3 domain-containing protein At1g49475-like (AHRD V3.3 *-* XP_025886111.1)
Solyc00g500221	0.102907	0.0150857	0	0	0	0	0.0939927	0.057189	B3 domain-containing protein (AHRD V3.3 *-* A0A1Q3DFU3_CEPFO)
Solyc00g500222	0.0578023	0.311431	0	0.0288453	0.0408607	0	0.0306103	0.11536	Transcriptional factor B3 family protein (AHRD V3.3 *-* A0A2H1ZEQ2_ARATH)
Solyc00g500223	0	0	0	0	0	0	0	0	Retrovirus-related Pol polyprotein from transposon TNT 1-94 (AHRD V3.3 *-* A0A2I0W6G5_9ASPA)
Solyc00g500224	0.028878	0	0	0	0.0570073	0	0	0	Cytochrome c biogenesis FC (AHRD V3.3 *-* A0A0C5B7H6_9SOLA)
Solyc00g500225	0	0	0	0	0.210828	0	0.0648203	0.032144	NADH-ubiquinone oxidoreductase chain 3 (AHRD V3.3 *** G9FCN6_9LAMI)
Solyc00g500226	0	0.0275167	0	0	0	0	0	0	Cytochrome c biogenesis FC (AHRD V3.3 *-* A0A0C5B7H6_9SOLA)
Solyc00g500227	0	0	0	0	0	0	0	0	RNA-dependent RNA polymerase (AHRD V3.3 *** A0A2Z6JIR4_9VIRU)
Solyc00g500228	0.027537	0.0175283	0.0115467	0.0102697	0.459412	0.158523	0.0735297	0.06773	Ribosomal protein L2 (AHRD V3.3 *** A0A290WL33_SOLLC)
Solyc00g500229	0	0	0	0	0	0	0	0	Unknown protein
Solyc00g500230	0	0	0	0	0	0	0	0	Unknown protein
Solyc00g500231	0	0	0	0	0	0	0	0	Unknown protein
Solyc00g500232	0	0	0	0	0	0	0	0	Unknown protein
Solyc00g500233	0	0	0	0	0	0	0	0	Unknown protein
Solyc00g500234	0	0	0	0	0	0	0	0	Unknown protein
Solyc00g500235	0	0	0	0	0	0	0	0	Unknown protein
Solyc00g500236	0	0	0	0	0	0	0	0	MP domain-containing protein (AHRD V3.3 *-* A0A1Q3BUD1_CEPFO)
Solyc00g500237	0	0	0	0	0	0	0	0	Transport membrane protein (AHRD V3.3 *-* A0A0C5ARU2_HYONI)
Solyc00g500238	0	0	0	0	0	0.0573233	0.026451	0	orf211 gene product (mitochondrion) (AHRD V3.3 --* NP_064093.1)
Solyc00g500239	0	0	0	0	0.017121	0	0	0	Protein Ycf2 (AHRD V3.3 *-* A0A142DP97_9LAMI)
Solyc00g500240	0	0	0	0	0	0	0	0	Cytochrome b (AHRD V3.3 *** A0A2G3ARK2_CAPCH)
Solyc00g500241	0	0.023126	0	0.0247247	0	0	0.0297597	0	Cytochrome c biogenesis FC (AHRD V3.3 *-* A0A0C5B7H6_9SOLA)
Solyc00g500242	0	0	0	0	0.008808	0.002541	0	0	Heme exporter protein C (AHRD V3.3 *** A0A2S4LUD9_9BRAD)
Solyc00g500243	0.141743	0.146121	0.135638	0.0911823	0.241212	0.130727	0.129146	0.101327	Cytochrome c oxidase subunit 2 (AHRD V3.3 *-* A0A0C5B2A3_HYONI)
Solyc00g500244	0.007989	0.0131027	0.00211	0.000374667	0.0318603	0.00600167	0.000241667	0.000986667	Cytochrome c oxidase subunit 2 (AHRD V3.3 *** A0A2G2X686_CAPBA)
Solyc00g500245	0.01994	0	0	0	0.0500733	0.00877033	0.006372	0.00917967	Ribosomal protein S3 (AHRD V3.3 *** A0A290WKX3_SOLLC)
Solyc00g500246	0	0	0	0	0	0	0	0	Unknown protein
Solyc00g500247	0	0	0	0	0	0	0	0	AT hook motif DNA-binding family protein (AHRD V3.3 *-* A0A2U1PYS7_ARTAN)
Solyc00g500248	0	0	0	0	0	0	0	0	AT hook, DNA-binding motif-containing protein (AHRD V3.3 *-* A0A2U1KK62_ARTAN)
Solyc00g500249	0	0.010676	0	0	0	0	0	0.032715	Cytochrome c biogenesis FN (AHRD V3.3 *** A0A0C5B9X0_9SOLA)
Solyc00g500250	0.0393243	0	0.0242157	0	0.030093	0.0195997	0.0195007	0	Cytochrome c oxidase subunit 1 (AHRD V3.3 *** A0A2G2YXI2_CAPAN)
Solyc00g500251	0	0	0	0	0	0	0	0	NADH-ubiquinone oxidoreductase chain 4 (AHRD V3.3 *-* A0A290WL40_SOLLC)
Solyc00g500252	0.0142383	0.0263283	0	0.0114533	0.0445517	0.0346753	0.0209483	0.0349	NADH-ubiquinone oxidoreductase chain 4 (AHRD V3.3 *** A0A2G3CZD8_CAPCH)
Solyc00g500253	0.00833433	0.013132	0.0145303	0.00142333	0.0552353	0.046393	0.0437333	0.0394503	NADH-ubiquinone oxidoreductase chain 4 (AHRD V3.3 *** A0A2G2X0J9_CAPBA)
Solyc00g500254	0	0	0	0.0376623	0.139431	0	0	0	50S ribosomal protein L20, chloroplastic (AHRD V3.3 *-* A0A2P1M7F3_9LAMI)
Solyc00g500255	0.0121627	0.0746113	0	0	0.101858	0.135415	0.0793353	0.00735167	RNA-dependent RNA polymerase (AHRD V3.3 *-* A0A2Z6JIR4_9VIRU)
Solyc00g500256	0	0	0	0.0732557	0.133377	0.0379707	0	0	NADH-ubiquinone oxidoreductase chain 5 (AHRD V3.3 *-* A0A1Y0B159_9LAMI)
Solyc00g500257	0.121137	0.101767	0.099793	0.066954	0.264275	0.120235	0.302898	0.149907	Transmembrane protein (AHRD V3.3 *-* A0A1P8B2M8_ARATH)
Solyc00g500258	0	0	0	0	0	0	0	0	Chitinase (AHRD V3.3 *-* B9VRK7_CAPAN)
Solyc00g500259	0	0	0	0	0	0	0	0	Unknown protein
Solyc00g500260	0	0	0	0	0	0	0	0	Cytochrome b (AHRD V3.3 *-* A0A2G3ARK2_CAPCH)
Solyc00g500261	0.0255207	0.0455767	0.001683	0	0.146691	0.021766	0.0854573	0.036475	NADH-ubiquinone oxidoreductase chain 3 (AHRD V3.3 *** A0A2G2V3C2_CAPBA)
Solyc00g500262	0	0	0	0	0	0	0	0	Transmembrane protein (AHRD V3.3 *-* Q3EC50_ARATH)
Solyc00g500263	0.030807	0.0410473	0.0192467	0.0189847	0.144201	0.047923	0.025289	0.0189763	RNA-dependent RNA polymerase (AHRD V3.3 *** A0A2Z6JIR4_9VIRU)
Solyc00g500264	0	0	0	0	0	0	0	0	Unknown protein
Solyc00g500265	0	0	0	0	0	0	0	0	Unknown protein
Solyc00g500266	0	0	0	0	0	0	0	0	Unknown protein
Solyc00g500267	0	0	0	0	0	0	0	0	Unknown protein
Solyc00g500268	0	0	0	0	0	0	0	0	Unknown protein
Solyc00g500269	0	0	0	0	0	0	0	0	Unknown protein
Solyc00g500270	0	0	0	0	0	0	0	0	Unknown protein
Solyc00g500271	0.0126117	0.0208523	0.0468197	0.00907367	0.129513	0.0210573	0.031999	0.0249197	NADH-ubiquinone oxidoreductase chain 5 (AHRD V3.3 *** A0A0C5ARN6_HYONI)
Solyc00g500272	0.0748017	0.018799	0.010905	0	0.214412	0.042577	0.0360297	0.052601	Cytochrome C oxidase subunit II-like%2C transmembrane domain-containing protein (AHRD V3.3 *** ATMG01280.1)
Solyc00g500273	0.0171077	0.145648	0.0133997	0	0.115189	0.0333023	0.033806	0.0353007	Ribosomal protein S19 (AHRD V3.3 *** A0A290WKX2_SOLLC)
Solyc00g500274	0	0	0	0	0.017242	0	0	0	Ribosomal protein S3 (AHRD V3.3 *** A0A290WKX3_SOLLC)
Solyc00g500275	0.00691467	0.0210677	0.00546533	0.000963667	0.040082	0.006015	0.0130707	0.00687167	Cytochrome c oxidase subunit 2 (AHRD V3.3 *** A0A2G2X686_CAPBA)
Solyc00g500276	0.0153863	0.0401817	0.0270187	0	0.0923457	0.00575867	0.0158353	0.0190827	Cytochrome c oxidase subunit 2 (AHRD V3.3 *-* A0A0C5B2A3_HYONI)
Solyc00g500277	0	0	0	0	0.008808	0.002541	0	0	Heme exporter protein C (AHRD V3.3 *** A0A2S4LUD9_9BRAD)
Solyc00g500278	0	0	0	0	0	0	0	0	Protein TIC 214 (AHRD V3.3 *-* TI214_SOLTU)
Solyc00g500279	0	0	0	0	0	0	0	0	Protein TIC 214 (AHRD V3.3 *-* TI214_SOLTU)
Solyc00g500280	0	0	0	0	0.0239263	0	0	0	NAD(P)H-quinone oxidoreductase subunit H, chloroplastic (AHRD V3.3 *** A0A1S5SJX5_ORYVI)
Solyc00g500281	0	0	0	0	0	0	0	0	Retrovirus-related Pol polyprotein from transposon TNT 1-94 (AHRD V3.3 *-* A0A2I0X5W4_9ASPA)
Solyc00g500282	0	0	0	0	0	0	0	0	Unknown protein
Solyc00g500283	0	0	0	0	0	0	0	0	Unknown protein
Solyc00g500284	0	0	0	0	0	0	0	0	Auxin-responsive GH3 family protein (AHRD V3.3 *-* A0A2U1NZC8_ARTAN)
Solyc00g500285	0	0	0	0	0	0	0	0	Auxin-responsive GH3 family protein (AHRD V3.3 *-* A0A2U1MJ34_ARTAN)
Solyc00g500286	0	0	0	0	0	0	0	0	Auxin-responsive GH3 family protein (AHRD V3.3 *-* A0A2U1NZC8_ARTAN)
Solyc00g500287	0	0	0	0	0	0	0	0	Auxin-responsive GH3 family protein (AHRD V3.3 *-* A0A2U1MJ34_ARTAN)
Solyc00g500288	0	0	0	0	0	0	0	0	Unknown protein
Solyc00g500289	0	0	0	0	0	0	0	0	Unknown protein
Solyc00g500290	0.00829267	0.00961767	0	0	0	0	0	0	DNA-directed RNA polymerase subunit beta'' (AHRD V3.3 *** A0A1U8QCC7_CAPAN)
Solyc00g500291	0	0	0	0	0	0	0	0	30S ribosomal protein S2, chloroplastic (AHRD V3.3 *** I6N946_DATST)
Solyc00g500292	4.81688	4.20139	0.771304	0.859524	0.385362	0.23228	0.239621	0.218068	ATP synthase subunit alpha, chloroplastic (AHRD V3.3 *** I6N942_DATST)
Solyc00g500293	1.26985	1.45986	0.16762	0.205783	0.106789	0.059872	0.149602	0	Photosystem II reaction center protein K (AHRD V3.3 *** A0A1U8QD48_CAPAN)
Solyc00g500294	0.133768	0.226642	0	0	0.039315	0	0	0	Unknown protein
Solyc00g500295	0	0.116996	0	0	0.0589187	0	0	0	Maturase K (AHRD V3.3 *** A0A2G3DGH8_CAPCH)
Solyc00g500296	1.48586	1.04764	0.675097	0.299032	0.349167	0.149072	0.0994283	0.0845073	Photosystem II protein D1 (AHRD V3.3 *** A0A1U8QBZ9_CAPAN)
Solyc00g500297	2.28651	2.69055	0.974043	1.08641	0.813025	0.72255	0.613577	0.665036	50S ribosomal protein L2 (AHRD V3.3 *** H6T990_9CARY)
Solyc00g500298	1.00957	1.18911	0.48845	0.461529	0.383953	0.334319	0.296939	0.232014	50S ribosomal protein L2, chloroplastic (AHRD V3.3 *** I6N9C2_DATST)
Solyc00g500299	0.165511	0	0	0	0	0	0	0	Ycf15 protein (AHRD V3.3 *-* J7H9P3_CAPAN)
Solyc00g500300	0	0	0	0	0	0	0	0	Ycf15 protein (AHRD V3.3 *-* J7H9P3_CAPAN)
Solyc00g500301	0	0	0	0	0	0	0	0	Ycf15 (AHRD V3.3 *-* A0A346JLD3_9ASTE)
Solyc00g500302	0.0525497	0.065063	0.0895073	0.028154	0.229387	0.0921557	0.043273	0.0302017	ATPase subunit 4 (AHRD V3.3 *** A0A0C5B288_HYONI)
Solyc00g500303	0.026843	0.0269733	0.00285133	0.00214167	0.075546	0.021084	0.0371653	0.019134	Cytochrome c oxidase subunit 3 (AHRD V3.3 *** A0A0C5BKQ0_9SOLA)
Solyc00g500304	0	0.002764	0	0	0.0171107	0	0	0	Protein Ycf2 (AHRD V3.3 *-* A0A142DP97_9LAMI)
Solyc00g500305	0	0	0	0	0	0	0	0	Unknown protein
Solyc00g500306	0	0	0	0	0	0	0	0	Unknown protein
Solyc00g500307	0	0	0	0	0	0	0	0	Unknown protein
Solyc00g500308	0	0	0	0	0	0	0	0	Unknown protein
Solyc00g500309	0	0	0	0	0	0	0	0	Ribosomal protein S3 (AHRD V3.3 *** A0A290WKX3_SOLLC)
Solyc00g500310	0	0	0	0	0.0110447	0	0	0	Cytochrome c oxidase subunit 2 (AHRD V3.3 *** A0A2G2X686_CAPBA)
Solyc00g500311	0	0.001991	0.000982	0	0.00363267	0.003182	0	0	Cytochrome c oxidase subunit 2 (AHRD V3.3 *-* A0A0C5B2A3_HYONI)
Solyc00g500312	0	0	0	0	0	0	0	0	Cytochrome b (AHRD V3.3 *-* A0A2G3ARK2_CAPCH)
Solyc00g500313	0.570029	0.709068	0.178555	0.345633	1.0644	0.924608	0.970429	0.621374	Unknown protein
Solyc00g500314	0.154957	0.181985	0.0744607	0.255915	0.676702	0.80486	0.949554	0.204512	NADH dehydrogenase subunit 2 (AHRD V3.3 *-* A0A0C5B2A9_HYONI)
Solyc00g500315	0.314509	0	0.422278	0	1.74562	0	0	0	LOW QUALITY PROTEIN: uncharacterized protein LOC112326444, partial (AHRD V3.3 *-* XP_024449890.1)
Solyc00g500316	0.203665	0.250753	0.215997	0.105134	0	0.309315	0.915207	0.795557	NADH dehydrogenase subunit 2 (AHRD V3.3 *-* A0A060DER8_9GENT)
Solyc00g500317	0.0126117	0.0283057	0.0468197	0.00907367	0.138037	0.0210573	0.031999	0.0249197	NADH-ubiquinone oxidoreductase chain 5 (AHRD V3.3 *** A0A0C5ARN6_HYONI)
Solyc00g500318	0.0748017	0.018799	0.0158943	0	0.221356	0.042577	0.0360297	0.052601	Cytochrome C oxidase subunit II-like%2C transmembrane domain-containing protein (AHRD V3.3 *** ATMG01280.1)
Solyc00g500319	0	0	0	0	0	0	0	0	DNA-directed RNA polymerase subunit beta'' (AHRD V3.3 *** A0A1U8QCC7_CAPAN)
Solyc00g500320	0	0	0	0	0	0	0	0	Photosystem II protein D1 (AHRD V3.3 *** A0A1U8QBZ9_CAPAN)
Solyc00g500321	0	0	0	0	0	0	0	0	ATP synthase subunit b, chloroplastic (AHRD V3.3 *** I6N943_DATST)
Solyc00g500322	1.86265	1.57058	0.352557	0.32853	0.149951	0.0758403	0.104489	0.092655	ATP synthase subunit b, chloroplastic (AHRD V3.3 *** I6N943_DATST)
Solyc00g500323	2.50775	1.98285	0.367921	0.409469	0.223562	0.129477	0.121181	0.124214	ATP synthase subunit alpha, chloroplastic (AHRD V3.3 *** I6N942_DATST)
Solyc00g500324	0.0360943	0.0192397	0.0160787	0.00304933	0.0338873	0.011367	0.011976	0.00869067	Protein TIC 214 (AHRD V3.3 *** TI214_SOLTU)
Solyc00g500325	0	0	0	0	0	0	0	0	Ycf15 (AHRD V3.3 *-* A0A346JLD3_9ASTE)
Solyc00g500326	0	0	0	0	0	0	0	0	Ycf15 protein (AHRD V3.3 *-* J7H9P3_CAPAN)
Solyc00g500327	0	0	0	0	0	0	0	0	Protein Ycf2 (AHRD V3.3 *** A0A1Z1GA65_LITCN)
Solyc00g500328	0	0	0	0	0	0	0	0	Ribosomal protein L2, plastid (AHRD V3.3 *-* A0A2U1PJW3_ARTAN)
Solyc00g500329	1.39497	1.00778	0.687794	0.293888	0.345079	0.129677	0.0857583	0.076977	Photosystem II protein D1 (AHRD V3.3 *** A0A1U8QBZ9_CAPAN)
Solyc00g500330	0	0	0	0	0	0	0	0	Maturase K (AHRD V3.3 *** A0A2G3DGH8_CAPCH)
Solyc00g500331	0.571858	0	0.136339	0	0.0483963	0	0	0	Photosystem II reaction center protein K (AHRD V3.3 *** A0A1U8QD48_CAPAN)
Solyc00g500332	3.98502	3.53828	0.695386	0.749719	0.333629	0.199275	0.195427	0.191319	ATP synthase subunit alpha, chloroplastic (AHRD V3.3 *** I6N942_DATST)
Solyc00g500333	0.461122	0.517727	0.0461327	0.153804	0.0443487	0.00760367	0	0	ATP synthase subunit b, chloroplastic (AHRD V3.3 *** I6N943_DATST)
Solyc00g500334	0	0	0	0	0	0	0	0	ATP synthase subunit c, chloroplastic (AHRD V3.3 *** A0A2G2XQ72_CAPBA)
Solyc00g500335	0	0	0	0	0	0	0	0	ATP synthase subunit a, chloroplastic (AHRD V3.3 *** J7H3L4_CAPAN)
Solyc00g500336	0	0	0	0	0	0	0	0	Retrovirus-related Pol polyprotein from transposon TNT 1-94 (AHRD V3.3 *-* A0A2K3MZL8_TRIPR)
Solyc00g500337	0	0	0	0	0	0	0	0	Retrovirus-related Pol polyprotein from transposon TNT 1-94 (AHRD V3.3 *-* A0A2K3MZL8_TRIPR)
Solyc00g500338	0	0	0	0	0	0	0	0	Unknown protein
Solyc00g500339	0.071677	0.0371683	0.0906883	0	0.07681	0	0.0722127	0	Unknown protein
Solyc00g500340	0	0	0.026449	0	0	0	0	0	orf211 gene product (mitochondrion) (AHRD V3.3 --* NP_064093.1)
Solyc00g500341	0	0	0	0	0	0	0	0	Unknown protein
Solyc00g500342	0	0	0	0	0.066136	0	0	0	Unknown protein
Solyc00g500343	0.467003	0.332329	0.302552	0.214679	0.763583	0.565082	0.908941	0.320288	hypothetical protein (AHRD V3.3 *** ATMG00660.1)
Solyc00g500344	0	0	0	0	0.03737	0	0	0	ATP synthase subunit beta, chloroplastic (AHRD V3.3 *-* A0A2U1KL25_ARTAN)
Solyc00g500345	0	0	0	0	0	0	0	0	ATP synthase subunit alpha (AHRD V3.3 *** A0A2G3AS26_CAPCH)
Solyc00g500346	0	0	0	0	0	0	0	0	Transport membrane protein (AHRD V3.3 *** A0A0C5ARU2_HYONI)
Solyc00g500347	0	0	0	0	0	0	0	0	Cytochrome c biogenesis FN (AHRD V3.3 *** A0A0C5B9X0_9SOLA)
Solyc00g500348	0	0	0	0	0	0	0	0	Cytochrome c biogenesis FN (AHRD V3.3 *** A0A0C5B9X0_9SOLA)
Solyc00g500349	0.069663	0.0292073	0.0181743	0	0.124321	0.0215137	0.00787567	0.0145417	Cytochrome c oxidase subunit 1 (AHRD V3.3 *** A0A2G2YXI2_CAPAN)
Solyc00g500350	0	0	0	0	0	0	0	0	RNA-dependent RNA polymerase (AHRD V3.3 *** A0A2Z6JIR4_9VIRU)
Solyc00g500351	0	0	0	0	0	0	0	0	Ribosomal protein S13 (AHRD V3.3 *-* A0A0C5B313_9SOLA)
Solyc00g500352	0	0	0	0	0	0	0	0	Unknown protein
Solyc00g500353	0	0	0	0	0	0	0	0	Phenylalanine ammonia-lyase (AHRD V3.3 *** A0A2G2VZP0_CAPBA)
Solyc00g500354	0	0	0	0	0	0	0	0	Retrovirus-related Pol polyprotein from transposon TNT 1-94 (AHRD V3.3 *-* A0A2K3MQM8_TRIPR)
Solyc00g500355	0	0	0	0	0	0	0	0	Unknown protein
Solyc00g500356	0	0	0	0	0	0	0	0	Unknown protein
Solyc00g500357	0	0	0	0	0	0	0	0	Transport membrane protein (AHRD V3.3 *** A0A0C5ARU2_HYONI)
Solyc00g500358	0.146178	0.137217	0.194331	0.0692663	0.81459	0.176495	0.126291	0.126252	ATP synthase subunit alpha (AHRD V3.3 *** A0A2H4NB27_SOLLC)
Solyc00g500359	0.00262133	0.0269717	0.00546533	0.00820633	0.0298837	0.002306	0.00184	0.00211867	Cytochrome c oxidase subunit 2 (AHRD V3.3 *** A0A2G2X686_CAPBA)
Solyc00g500360	0.0218973	0.0458163	0.0216227	0	0.0919773	0.00575867	0.0158353	0.0190827	Cytochrome c oxidase subunit 2 (AHRD V3.3 *-* A0A0C5B2A3_HYONI)
Solyc00g500361	0	0	0	0	0.027427	0	0	0	NADH-ubiquinone oxidoreductase chain 3 (AHRD V3.3 *-* A0A2G2V3C2_CAPBA)
Solyc00g500362	0	0	0	0.018524	0.114722	0	0	0	Ribosomal protein L5 (AHRD V3.3 *** A0A290WL59_SOLLC)
Solyc00g500363	0	0	0	0	0	0	0	0	Ribosomal protein L5 (AHRD V3.3 *** A0A290WL59_SOLLC)
Solyc00g500364	0	0	0	0	0	0	0	0	Cytochrome b (AHRD V3.3 *** A0A2G3ARK2_CAPCH)
Solyc00g500365	0	0	0	0	0	0	0	0	Unknown protein
Solyc00g500366	0	0	0	0	0	0	0	0	Unknown protein
Solyc00g500367	0	0	0	0	0	0	0	0	Unknown protein
Solyc00g500368	0	0	0	0	0	0	0	0	Unknown protein
Solyc00g500369	0	0	0	0	0	0	0	0	Unknown protein
Solyc00g500370	0	0	0	0	0	0	0	0	Unknown protein
Solyc00g500371	0	0	0	0	0	0	0	0	Unknown protein
Solyc00g500372	0	0	0	0	0	0	0	0	Unknown protein
Solyc00g500373	0.171679	0	0.0420633	0	0.136727	0	0.187548	0.0112847	Magnesium transporter CorA-like family protein (AHRD V3.3 *-* A0A2K3P294_TRIPR)
Solyc00g500374	0	0	0	0	0	0	0	0	Unknown protein
Solyc00g500375	0	0	0	0	0	0	0	0	Unknown protein
Solyc00g500376	0	0	0	0	0	0	0	0	Unknown protein
Solyc00g500377	0	0	0	0	0	0	0	0	Unknown protein
Solyc00g500378	0	0	0	0	0.0231903	0	0	0	Unknown protein
Solyc00g500379	0	0	0	0	0	0	0	0	Unknown protein
Solyc00g500380	0	0	0	0	0	0	0	0	Unknown protein
Solyc00g500381	0	0	0	0	0	0	0	0	Unknown protein
Solyc00g500382	0	0	0	0	0	0	0	0	Unknown protein
Solyc00g500383	0	0	0	0	0	0	0	0	Unknown protein
Solyc00g500384	0	0	0	0	0	0	0	0	Unknown protein
Solyc00g500385	0	0	0	0	0	0	0	0	Unknown protein
Solyc00g500386	0	0	0	0	0	0	0	0	Unknown protein
Solyc00g500387	0	0	0	0	0	0	0	0	Unknown protein
Solyc00g500388	0	0	0	0	0	0	0	0	Unknown protein
Solyc00g500389	0	0	0	0	0	0	0	0	Unknown protein
Solyc00g500390	0	0	0	0	0	0	0	0	zinc finger CCCH domain-containing protein 24 (AHRD V3.3 --* XP_022001075.1)
Solyc00g500391	0	0	0	0	0	0	0	0	Unknown protein
Solyc00g500392	0	0	0	0	0	0	0	0	Unknown protein
Solyc00g500393	0	0	0	0	0	0	0	0	Unknown protein
Solyc00g500394	0	0	0	0	0	0	0	0	Unknown protein
Solyc00g500395	0	0	0	0	0	0	0	0	Unknown protein
Solyc00g500396	0	0	0	0	0	0	0	0	Unknown protein
Solyc00g500397	0	0	0	0	0	0	0	0	Unknown protein
Solyc00g500398	0	0	0	0	0	0	0	0	Unknown protein
Solyc00g500399	0	0	0	0	0	0	0	0	Unknown protein
Solyc00g500400	0	0	0	0	0	0	0	0	Unknown protein
Solyc00g500401	0	0	0	0	0	0	0	0	Unknown protein
Solyc00g500402	0	0	0	0	0	0	0	0	Unknown protein
Solyc00g500403	0	0	0	0	0	0	0	0	Unknown protein
Solyc00g500404	0	0	0	0	0	0	0	0	Unknown protein
Solyc00g500405	0.215891	0.459643	0	0.128359	0	0	0.0946597	0	Disease resistance protein (TIR-NBS-LRR class) family (AHRD V3.3 *-* A0A2U1N0W2_ARTAN)
Solyc00g500406	0.121463	0.374413	0	0	0	0	0	0	Disease resistance protein (TIR-NBS-LRR class) (AHRD V3.3 *-* A0A2K3PDT8_TRIPR)
Solyc00g500407	0	0	0	0	0	0	0	0	Unknown protein
Solyc00g500408	0	0	0	0	0	0	0	0	Unknown protein
Solyc00g500409	0	0	0	0	0	0	0	0	Unknown protein
Solyc01g004000	0	0	0	0	0	0	0	0	Unknown protein
Solyc01g004002	0	0	0	0	0	0	0	0	Unknown protein
Solyc01g004004	0	0	0	0	0	0	0	0	Unknown protein
Solyc01g004006	0	0	0	0	0	0	0	0	Unknown protein
Solyc01g004008	0	0	0	0	0	0	0	0	Unknown protein
Solyc01g005000	24.5289	20.8564	50.0042	32.8253	13.8231	22.4624	42.7666	33.8535	Glutamate decarboxylase (AHRD V3.3 *** B1Q3F2_SOLLC)
Solyc01g005010	16.1115	17.9778	17.667	17.0136	3.87689	18.2383	15.8903	17.1695	protein XRI1-like (AHRD V3.3 *** A0A2I4FA04_9ROSI)
Solyc01g005020	14.7465	12.826	14.5732	17.9916	14.771	17.1816	21.6359	23.0165	Salt Overly Sensitive 1
Solyc01g005030	5.8057	5.68354	4.4168	5.21486	11.7021	7.51129	8.46324	8.52192	MAP kinase kinase kinase 1
Solyc01g005040	0.837389	0.655974	0.161007	0.0897603	0.0742343	0.096796	0.203855	0.114124	CASP-like protein (AHRD V3.3 *** A0A2G3CF58_CAPCH)
Solyc01g005050	0	0.0430263	0.0680013	0	0.459017	0.0207743	0.0231957	0	CASP-like protein (AHRD V3.3 --* A0A2G3CF58_CAPCH)
Solyc01g005060	4.75288	6.16636	5.96617	6.45127	6.36608	4.53807	6.31049	7.16139	Zinc finger protein (AHRD V3.3 *** A0A200QDS5_9MAGN)
Solyc01g005070	0.049762	0.0488517	0.180629	0.0116187	0.121645	0.143047	0.117699	0.107851	ENTH/ANTH/VHS superfamily protein (AHRD V3.3 *** AT1G68110.1)
Solyc01g005080	17.9963	15.3281	9.23678	7.61795	13.5595	8.93086	15.7279	16.26	65-kDa microtubule-associated protein 6 (AHRD V3.3 *** A0A2G2XSF2_CAPBA),Pfam:PF03999
Solyc01g005090	0	0	0	0	0.034424	0	0	0	Type I inositol polyphosphate 5-phosphatase 5 (AHRD V3.3 *-* IP5P5_ARATH)
Solyc01g005100	9.06177	7.08508	4.93285	6.27889	6.52597	8.45639	10.9307	10.3424	2-oxoglutarate (2OG) and Fe(II)-dependent oxygenase superfamily protein (AHRD V3.3 *** AT1G68080.1)
Solyc01g005110	11.2931	10.9838	13.0744	12.8528	28.6833	26.5319	17.2251	15.0963	Dolichol-phosphate mannosyltransferase-related protein (AHRD V3.3 *** A0A2U1LCX2_ARTAN)
Solyc01g005120	6.39962	5.26909	13.1249	6.24655	15.7521	30.3631	47.1736	49.2741	Xyloglucan endotransglucosylase/hydrolase (AHRD V3.3 *** A0A2G3AYH1_CAPCH)
Solyc01g005130	5.9507	5.25698	2.35509	2.70005	4.40652	12.7006	11.016	13.8975	Zinc finger protein 1 (AHRD V3.3 *** A0A2G2XSH3_CAPBA)
Solyc01g005140	0	0.0181863	0	0.015718	0.0619663	0.129754	0.0131037	0	Cytochrome b561/ferric reductase transmembrane (AHRD V3.3 *** A0A2U1MNP8_ARTAN)
Solyc01g005150	4.51533	4.76336	2.71289	6.66384	1.25387	2.1818	1.71333	1.74281	Cytochrome b561/ferric reductase transmembrane protein family (AHRD V3.3 *** A0A2U1MNM8_ARTAN)
Solyc01g005160	0.829788	0.475894	0.194724	0.0103743	0.675074	0.0532283	0.139256	0.0210747	Avr9/Cf-9 rapidly elicited protein 1
Solyc01g005180	0.131608	0.267303	0.575903	0.114192	1.20457	1.0916	0.927666	1.30499	protein LITTLE ZIPPER 3 (AHRD V3.3 *-* A0A2I4E2N9_9ROSI)
Solyc01g005210	15.1046	12.1202	13.5637	15.7578	18.4003	15.181	20.3778	23.5638	Trehalose-6-phosphate synthase (AHRD V3.3 *** E5GC29_CUCME)
Solyc01g005220	1.31144	1.5113	0.413861	0.86735	1.2357	0.476228	0.115348	0.253348	MACPF domain-containing protein (AHRD V3.3 *** A0A2G3AYJ5_CAPCH)
Solyc01g005230	0.282298	0.320662	0.048924	0.0378763	0.076878	0.0950787	0.215884	0.274411	S-adenosyl-L-methionine-dependent methyltransferases superfamily protein (AHRD V3.3 *** A0A2U1QHF5_ARTAN)
Solyc01g005240	20.1982	19.5625	19.6758	21.9817	26.8119	28.4183	32.6194	32.4655	Aspartokinase (AHRD V3.3 *** A0A2I4FQZ8_9ROSI)
Solyc01g005250	42.4909	42.7303	29.8867	33.8878	24.922	24.7427	25.4597	21.8743	Aspartate-semialdehyde dehydrogenase (AHRD V3.3 *** A0A2G3AYJ3_CAPCH)
Solyc01g005253	6.89236	8.59999	6.79176	8.27113	2.20908	4.54659	3.93131	4.22294	Sec14p-like phosphatidylinositol transfer family protein (AHRD V3.3 *** A0A1Y1I4L4_KLENI)
Solyc01g005257	12.5394	13.0142	2.92307	4.48874	3.40918	2.14403	2.00314	1.82939	Sec14p-like phosphatidylinositol transfer family protein (AHRD V3.3 *** A0A1Y1I4L4_KLENI)
Solyc01g005280	9.89993	11.0732	4.43322	7.86666	2.18838	4.19042	3.06311	2.95097	Sec14p-like phosphatidylinositol transfer family protein (AHRD V3.3 *** A0A1Y1I4L4_KLENI)
Solyc01g005290	18.7906	24.2585	12.8072	19.5269	11.7665	11.5814	4.7233	5.63294	Sec14p-like phosphatidylinositol transfer family protein (AHRD V3.3 *** A0A1Y1I4L4_KLENI)
Solyc01g005300	41.7449	69.6801	50.0993	76.3642	21.3786	80.2193	52.3551	82.9057	Adagio-like protein 1 (AHRD V3.3 *** A0A1U8H9V5_CAPAN)
Solyc01g005310	0.003542	0.0153083	0.00158733	0.0458153	1.63981	0.111038	0.0577233	0.0463103	Dynamin (AHRD V3.3 *** E5GB64_CUCME)
Solyc01g005320	0.161209	0.23216	0.032829	0.248798	0.0523283	0.118659	0.347262	0.122998	3-oxo-5-alpha-steroid 4-dehydrogenase (DUF1295) (AHRD V3.3 *** O81042_ARATH)
Solyc01g005330	37.4647	34.0681	44.7439	43.7659	28.0834	45.7022	63.0192	70.6772	Microtubule-associated protein 70 (AHRD V3.3 *** A0A200QNX4_9MAGN)
Solyc01g005340	5.49118	5.44884	3.86658	4.82754	7.97072	5.65161	4.83858	5.88756	Ankyrin repeat-containing protein (AHRD V3.3 *** A0A2G2XSI9_CAPBA)
Solyc01g005350	4.40045	4.03341	1.73337	2.75212	0.026561	0.153144	0.0402923	0	S-adenosyl-L-methionine-dependent methyltransferases superfamily protein (AHRD V3.3 *** A0A2U1QHF5_ARTAN)
Solyc01g005360	1.26757	0.677576	0.267075	0.100545	12.4123	1.21212	0	0	S-adenosyl-L-methionine-dependent methyltransferases superfamily protein (AHRD V3.3 *** A0A2U1QHF5_ARTAN)
Solyc01g005370	4.36963	5.16934	4.45207	5.65388	20.4568	4.1535	1.32465	1.68972	Calcium-dependent protein kinase (AHRD V3.3 *-* CDPK_DAUCA)
Solyc01g005380	10.6747	12.3499	7.81161	8.97943	6.77346	10.6255	11.839	11.4794	Histone-lysine N-methyltransferase setd3 (AHRD V3.3 *** A0A1J3D0A4_NOCCA)
Solyc01g005390	0.885545	0.581243	0.155965	0.216364	0.249068	0.208177	0.34455	0.440819	Nudix hydrolase (AHRD V3.3 *** A0A2U1MBD3_ARTAN)
Solyc01g005400	6.85052	6.06776	2.96859	4.17016	6.05716	1.52511	0.93545	0.989423	Caleosin (AHRD V3.3 *** A0A200QL80_9MAGN)
Solyc01g005410	21.9228	22.6166	0.142754	1.0536	0.0695367	2.46728	1.17676	2.66163	Caleosin (AHRD V3.3 *** A0A200QL80_9MAGN)
Solyc01g005420	31.5594	34.7569	8.45411	13.2002	0.14072	1.61698	2.48745	2.12317	C2 calcium-dependent membrane targeting (AHRD V3.3 *-* A0A2U1LLL4_ARTAN)
Solyc01g005430	4.3714	3.61952	4.42288	4.10155	5.30512	4.47932	4.52358	4.75914	Plant ubx domain-containing protein 2 (AHRD V3.3 *** A0A1J6HWL3_NICAT)
Solyc01g005440	329.76	247.874	321.495	316.994	140.11	204.002	349.759	255.46	Jasmonate ZIM-domain protein 2 (AHRD V3.3 *** B3Y562_TOBAC)
Solyc01g005450	8.90167	9.81239	2.09462	2.39339	2.21646	1.11383	2.20219	1.98643	F-box protein SKIP28 (AHRD V3.3 *** A0A2I4F4P9_9ROSI)
Solyc01g005460	12.2152	11.4569	21.667	20.7941	9.16277	24.4515	28.8445	24.6816	Dynein light chain (AHRD V3.3 *** A0A1U8EJW7_CAPAN)
Solyc01g005470	40.4761	60.9034	20.8156	43.3155	4.12027	22.0012	15.8963	15.7692	protein PLANT CADMIUM RESISTANCE 2-like (AHRD V3.3 *** A0A1U8ETE7_CAPAN)
Solyc01g005480	6.95993	6.83662	6.16216	7.03369	5.30663	8.19539	11.3826	11.3838	transmembrane protein%2C putative (DUF677) (AHRD V3.3 *** AT3G19330.4)
Solyc01g005490	13.541	12.2348	13.1113	12.4693	15.9849	15.0132	14.3126	14.5285	IAA-amino acid hydrolase ILR1 (AHRD V3.3 *** A0A2G2WJJ8_CAPBA)
Solyc01g005500	0.0713637	0.0729727	0.105402	0.0549107	0.0853647	0.050317	0	0	NAD(P)-binding Rossmann-fold superfamily protein (AHRD V3.3 *** A0A2U1PL19_ARTAN),Pfam:PF13561
Solyc01g005510	0.515461	0.484249	1.01665	0.42128	152.795	18.2607	0.0310707	0	L-ascorbate oxidase homolog (AHRD V3.3 *** Q6UN75_TOBAC)
Solyc01g005520	90.3297	92.1463	20.522	28.5087	8.82636	12.0261	12.4413	12.7432	Protein LOW PSII ACCUMULATION 1, chloroplastic (AHRD V3.3 *-* A0A1J3E7D8_NOCCA)
Solyc01g005530	10.1859	10.7454	12.9362	14.9652	7.88747	10.9946	15.2049	16.9333	nuclear polyadenylated RNA-binding protein (AHRD V3.3 *** AT3G13480.2)
Solyc01g005540	16.2534	16.1319	7.40593	8.74712	5.79881	7.17783	10.3559	10.436	Lysine--tRNA ligase (AHRD V3.3 *** A0A1U8HGH5_CAPAN)
Solyc01g005550	60.3479	66.1204	108.777	124.057	27.4119	116.65	163.678	193.281	DUF239 domain-containing protein/DUF4409 domain-containing protein (AHRD V3.3 *** A0A1Q3BKR6_CEPFO)
Solyc01g005560	96.1713	109.897	123.029	114.752	187.991	116.946	88.4283	85.928	Isocitrate dehydrogenase [NADP] (AHRD V3.3 *** A0A2G3BR90_CAPCH)
Solyc01g005570	24.6915	26.8535	36.4731	36.9861	35.4084	42.1376	46.1225	44.7041	hypothetical protein (DUF1639) (AHRD V3.3 *** AT1G55340.1)
Solyc01g005580	34.0047	32.1728	32.7023	33.9999	37.3654	35.9002	38.2189	39.7434	hypothetical protein (DUF1639) (AHRD V3.3 *** AT1G55340.1)
Solyc01g005590	176.243	95.2023	153.134	137.552	71.6985	113.339	112.672	83.8625	Unknown protein
Solyc01g005600	29.2099	32.9701	34.4731	39.1798	31.6005	40.0419	34.9962	36.7741	5'-adenylylsulfate reductase-like 5 (AHRD V3.3 *** A0A2G2W4X9_CAPBA)
Solyc01g005610	0	0	0	0	0.0214597	0	0.012764	0.012116	GDSL esterase/lipase (AHRD V3.3 *** A0A2G3AJV6_CAPAN)
Solyc01g005620	256.941	263.723	280.061	308.692	208.126	265.845	217.703	214.56	oxoglutarate/malate translocator
Solyc01g005630	0	0	0.0226923	0	2.25204	0.062153	0	0	Ethylene-responsive transcription factor (AHRD V3.3 *** A0A2G3BR89_CAPCH)
Solyc01g005640	7.67072	7.57802	10.904	10.3007	13.0774	10.2856	15.3625	15.7381	Histidine-tRNA ligase (AHRD V3.3 *** A0A1I9LTH3_ARATH)
Solyc01g005650	0	0	0.134818	0.0394367	7.11194	0.592614	0	0	RBR-type E3 ubiquitin transferase (AHRD V3.3 *** A0A2G2W4Q8_CAPBA)
Solyc01g005660	0	0	0	0	0.0305463	0.142694	0.534074	0.618145	R2R3MYB transcription factor 5
Solyc01g005670	3.01801	3.41276	3.01392	2.84645	4.3287	4.37496	5.12866	5.27906	BTB/POZ domain-containing protein (AHRD V3.3 *** A0A2I0X876_9ASPA)
Solyc01g005680	3.14741	4.00348	0.321621	0.305793	0.148318	0.0855587	0.284322	0.552152	Cytokinin riboside 5'-monophosphate phosphoribohydrolase (AHRD V3.3 *** A0A2I4FSE2_9ROSI)
Solyc01g005690	14.3184	15.0684	17.29	21.8842	15.7647	18.6644	18.9303	23.6312	Calcium ion binding protein (AHRD V3.3 *** A0A2U1KGE3_ARTAN)
Solyc01g005700	5.95486	6.07209	7.20756	6.69151	6.51175	8.71173	10.2531	11.6271	Transposase, MuDR, MULE transposase domain protein (AHRD V3.3 *** A0A2U1N7R9_ARTAN)
Solyc01g005710	3.17005	2.30275	0.546824	0.872335	0.0833513	0.0929043	0	0.0189783	Hcr9-Avr9-hir2 (AHRD V3.3 *-* Q3T7E8_SOLHA)
Solyc01g005720	2.26321	4.91319	0.590071	0.374919	0.0340977	0.137096	0.164087	0.152987	NL0D (AHRD V3.3 *** Q9ZS82_SOLLC)
Solyc01g005730	4.80419	3.82087	1.56336	2.60253	0.469515	0.400937	0.106022	0.193601	NL0C (AHRD V3.3 *** Q9ZS83_SOLLC)
Solyc01g005740	0.160434	0.0668397	0.012539	0.280216	0.708611	0.658686	0.0448627	0.120834	Unknown protein
Solyc01g005750	0	0	0	0	0	0	0	0	Lipoxygenase (AHRD V3.3 *-* O49878_SOLLC)
Solyc01g005760	7.98654	8.26782	1.63408	2.58438	0.0272757	3.95664	1.04758	1.70343	NL0D (AHRD V3.3 *** Q9ZS82_SOLLC)
Solyc01g005770	0.800225	0.672611	1.39533	1.26834	1.12444	2.08749	2.96843	2.97304	Unknown protein
Solyc01g005780	0.125268	0.482103	0.0764037	0.226855	0.0877757	0.069855	0.077404	0.131183	NL0E (AHRD V3.3 *** Q9ZS81_SOLLC)
Solyc01g005783	1.20336	1.18802	0.377462	0.947989	0.454103	1.68035	1.3352	1.36976	Unknown protein
Solyc01g005787	0	0	0.190305	0	0.102277	0	0	0	Unknown protein
Solyc01g005790	2.18921	1.4403	2.13244	1.96191	2.40259	3.01044	4.13134	4.90992	Pentatricopeptide repeat (AHRD V3.3 *** A0A200QH82_9MAGN)
Solyc01g005800	0.782841	0.766609	0.298455	0.517291	1.62187	0.627328	0.589344	0.549589	Calmodulin binding protein (AHRD V3.3 *** A0A2K3N563_TRIPR)
Solyc01g005810	33.1299	33.6358	39.5479	40.7222	33.5974	43.4436	49.755	50.0731	Protein MAK16 homolog (AHRD V3.3 *** A0A2G3DEE9_CAPCH)
Solyc01g005820	117.482	119.797	128.841	130.213	119.012	159.801	166.619	148.152	Serine/arginine-rich-splicing factor SCL30A (AHRD V3.3 *** A0A0M9UMR8_NICAT)
Solyc01g005830	16.1607	12.3706	24.1491	20.2196	12.7679	21.0117	31.4143	28.1522	Glucan endo-1,3-beta-glucosidase 4 (AHRD V3.3 *-* A0A2G2XNZ6_CAPBA)
Solyc01g005840	33.1624	37.7591	25.6214	29.9236	17.569	22.6419	22.9788	21.3416	Ubiquitin conjugating enzyme (AHRD V3.3 *** W7U085_9STRA)
Solyc01g005850	0.404433	0.307854	0.577168	0.300381	0.871543	1.19775	1.82453	2.80174	Extensin-like protein Dif54 (AHRD V3.3 *-* Q43505_SOLLC)
Solyc01g005860	0	0	0	0.0225757	0.339674	0.55181	0.694288	0.396052	Unknown protein
Solyc01g005870	17.3337	19.1178	7.48058	11.7284	0.68461	0.664357	1.04779	1.2896	Cf-like protein (AHRD V3.3 *** A0A140GMU3_SOLLC)
Solyc01g005880	0.319408	0.642504	0.351457	0.33092	0.003007	0	0	0	Extensin-like protein Dif10 (AHRD V3.3 *-* Q43504_SOLLC)
Solyc01g005890	0.030074	0.033027	0	0	0	0	0	0.020438	extensin-2-like (AHRD V3.3 *-* XP_019069150.1)
Solyc01g005900	1.59195	1.18383	1.92291	2.04252	1.74825	1.67281	1.74384	1.98838	Transferase (AHRD V3.3 *** A0A200Q1C0_9MAGN)
Solyc01g005910	24.6527	30.4596	10.1764	12.734	10.4979	10.6812	9.79192	9.80825	Acid phosphatase/vanadium-dependent haloperoxidase-related protein (AHRD V3.3 *** A0A2U1NM03_ARTAN)
Solyc01g005920	2.63674	2.20321	1.98248	0.880918	37.7884	3.62627	2.03006	1.87573	Amino acid/polyamine transporter I (AHRD V3.3 *** A0A200RCI7_9MAGN)
Solyc01g005930	5.83321	8.06945	4.8371	6.81063	7.49193	6.17609	4.83575	6.22357	Lipase/lipooxygenase%2C PLAT/LH2 family protein (AHRD V3.3 *** AT1G55280.2)
Solyc01g005940	0	0	0	0	0.0267527	0	0	0	Phytoene synthase, chloroplastic (AHRD V3.3 *** A0A2G3DEK5_CAPCH),Pfam:PF00494
Solyc01g005950	29.9924	30.1577	28.9159	29.5743	40.8191	40.2629	42.9462	42.9338	Serine/threonine-protein phosphatase (AHRD V3.3 *** A0A2G3DEI1_CAPCH)
Solyc01g005960	20.172	19.1609	22.4209	20.205	32.1926	34.7211	41.9315	41.8724	RNA helicase DEAD1
Solyc01g005970	3.45026	3.30245	4.10854	4.64896	7.46445	5.54327	7.18139	7.61607	F-box/kelch-repeat protein (AHRD V3.3 *** A0A1U8GYH7_CAPAN)
Solyc01g005980	21.7805	22.0859	13.9172	16.9356	13.8106	24.3642	21.2038	22.3775	transmembrane protein%2C putative (Protein of unknown function%2C DUF538) (AHRD V3.3 *** AT5G19860.1)
Solyc01g005985	63.5303	54.5598	112.719	135.545	66.5663	267.733	316.059	326.914	Bifunctional inhibitor/lipid-transfer protein/seed storage 2S albumin superfamily protein, putative (AHRD V3.3 *** A0A061GSH0_THECC)
Solyc01g006000	5.96176	6.20413	4.66926	4.52632	10.9292	9.43713	14.7203	16.5142	GPI mannosyltransferase 2 (AHRD V3.3 *** A0A2G3DEG8_CAPCH)
Solyc01g006010	3.54125	3.97441	4.28478	3.77757	6.16756	8.44779	11.2465	13.1307	Branchpoint-bridging protein (AHRD V3.3 *-* A0A1J3JYE2_NOCCA)
Solyc01g006020	91.9892	169.18	52.0546	103.544	24.0272	68.2699	45.1564	60.4106	BnaCnng41690D protein (AHRD V3.3 *** A0A078JEK8_BRANA)
Solyc01g006040	5.41405	4.9007	6.22982	5.14041	10.0544	9.93374	12.6329	14.4367	E3 ubiquitin protein ligase (AHRD V3.3 *** A0A2I4FSG3_9ROSI)
Solyc01g006050	0.217166	0.107092	0.085365	0.164003	0.043657	0.0167033	0	0	transmembrane protein 45B-like (AHRD V3.3 *** A0A2I4DQK0_9ROSI)
Solyc01g006055	1.62587	1.09025	1.53032	1.07539	0	0	0.431781	0.354808	Dirigent protein (AHRD V3.3 *** K4ASH2_SOLLC)
Solyc01g006080	0.221399	0.089664	0.0365107	0.0361117	0.160911	0.0289603	0.099465	0.0442343	Plant/protein (DUF789) (AHRD V3.3 *** Q8LF98_ARATH)
Solyc01g006090	4.31351	5.54759	4.94412	4.63589	11.9415	9.6905	8.45523	7.5379	Eukaryotic rRNA processing (AHRD V3.3 *** A0A2U1PZE8_ARTAN)
Solyc01g006100	9.73156	9.91538	21.1548	12.2293	18.7841	32.1219	50.5293	51.7996	cytosine-5 DNA methyltransferase1L
Solyc01g006110	25.7758	24.2462	28.9918	29.6194	34.8593	38.0574	44.3029	41.791	PP2A regulatory subunit TAP46 (AHRD V3.3 *** A0A2G2XNB2_CAPBA)
Solyc01g006120	35.3008	34.2217	48.9597	44.0785	61.9428	65.9069	87.9024	96.7341	Protein kinase family protein (AHRD V3.3 *** A0A2U1M4N4_ARTAN)
Solyc01g006130	72.3462	84.2361	29.3495	36.4274	15.8389	18.3749	15.0276	14.197	DnaJ/Hsp40 cysteine-rich domain superfamily protein (AHRD V3.3 *-* AT2G34860.2)
Solyc01g006140	2.28382	1.31205	1.81742	1.45255	1.13257	2.40357	3.76832	3.47228	CDT1-like protein a, chloroplastic (AHRD V3.3 *** A0A2I4F6Q2_9ROSI)
Solyc01g006150	12.3184	13.516	14.2856	16.7755	10.6969	17.9054	19.7054	17.7418	Cation efflux protein (AHRD V3.3 *** A0A200PY73_9MAGN)
Solyc01g006160	482.351	532.263	578.184	540.695	409.841	633.291	506.157	441.392	60S acidic ribosomal protein P1 (AHRD V3.3 *** A0A2G2W8Q0_CAPBA),Pfam:PF00428
Solyc01g006170	14.1487	17.8189	15.5538	13.443	24.6233	20.4369	22.5862	18.7354	Eukaryotic rRNA processing (AHRD V3.3 *** A0A2U1PZE8_ARTAN)
Solyc01g006180	2.45738	3.37972	3.78221	3.07498	5.84675	6.79583	9.31374	10.356	P-loop containing nucleoside triphosphate hydrolases superfamily protein (AHRD V3.3 *** A0A2U1MH74_ARTAN)
Solyc01g006190	36.4684	36.9897	30.4561	29.1104	24.5791	58.296	71.2222	71.066	E3 ubiquitin-protein ligase (AHRD V3.3 *** A0A1U8H1Q2_CAPAN)
Solyc01g006200	3.11168	2.66412	3.36348	3.76886	4.28696	6.38015	5.19759	4.21591	Unknown protein
Solyc01g006210	3.29788	3.04229	4.55299	3.30901	3.91729	6.17073	8.50982	6.68182	Non-structural maintenance of chromosomes element 1 (AHRD V3.3 *** A0A200Q0A2_9MAGN)
Solyc01g006220	5.25147	4.67509	5.04099	3.68901	6.82288	6.9921	12.0415	13.0811	histone-lysine N-methyltransferase ASHH3 (AHRD V3.3 *** A0A1S4DKJ0_TOBAC)
Solyc01g006230	14.6628	14.3799	14.0976	15.6831	21.369	19.4015	22.248	24.8653	Cysteine protease (AHRD V3.3 *** A0A2G3AHQ7_CAPAN)
Solyc01g006240	19.3037	20.7536	17.2248	25.9388	4.50936	9.02259	7.96833	7.36954	Inactive protein restricted tev movement 1 (AHRD V3.3 *** A0A314KP80_NICAT)
Solyc01g006250	3.01584	3.99845	3.83968	5.19062	3.72173	4.77112	4.95484	5.15567	F-box protein (AHRD V3.3 *** A0A2G3AHK9_CAPAN)
Solyc01g006260	6.46369	7.27627	7.17816	7.0072	8.15339	8.8903	8.52955	7.30065	Ribonuclease P/MRP protein subunit POP5 (AHRD V3.3 *** A0A200Q6K4_9MAGN)
Solyc01g006270	0	0	0	0	0	0	0	0	Unknown protein
Solyc01g006280	73.4975	91.2737	82.6415	134.645	26.818	50.2964	41.4498	48.037	Formate--tetrahydrofolate ligase (AHRD V3.3 *** A0A2G3DED7_CAPCH)
Solyc01g006290	10.6806	13.8762	0	0.088509	0	0	0	0	Peroxidase (AHRD V3.3 *** K4ASJ5_SOLLC)
Solyc01g006300	14.7994	15.2181	0	0.0490583	0.012732	0	0	0	LECEVI1A
Solyc01g006310	0	0	0.0113233	0	0	0	0	0	Peroxidase (AHRD V3.3 *** K4ASJ7_SOLLC)
Solyc01g006320	26.1562	28.3619	57.781	86.218	2.14694	30.8898	19.4181	18.7719	Late embryogenesis abundant (LEA) hydroxyproline-rich glycoprotein family (AHRD V3.3 *** Q9LJT9_ARATH)
Solyc01g006330	24.2422	28.5041	4.68626	7.5148	6.96594	2.4538	2.86436	2.34465	Plastid-lipid associated protein PAP / fibrillin family protein (AHRD V3.3 *** A0A2U1MH95_ARTAN)
Solyc01g006340	2.79119	2.92031	2.7305	2.55417	5.71031	5.21935	6.27381	7.51276	DEAD-box ATP-dependent RNA helicase 41 (AHRD V3.3 *** A0A2G3DEE5_CAPCH)
Solyc01g006350	17.2383	16.9926	21.0836	18.7226	28.0549	34.7112	51.2586	58.0523	Callose synthase 1 (AHRD V3.3 *** A0A2G3AHL0_CAPAN)
Solyc01g006360	3.04684	2.45167	5.79313	6.30991	8.18512	7.56777	15.3478	22.9894	Callose synthase 9 (AHRD V3.3 *** A0A2G3AHT3_CAPAN)
Solyc01g006370	23.6643	21.9568	37.2347	35.0458	24.3608	46.6001	91.2133	104.27	Callose synthase (AHRD V3.3 *** K7PRK8_MAIZE)
Solyc01g006380	0.482725	0.334416	1.53616	1.88829	0.778472	0.649696	1.47849	0.98984	RING-type E3 ubiquitin transferase (AHRD V3.3 *-* A0A2U1P546_ARTAN)
Solyc01g006390	1.57091	0.861262	26.0387	12.3402	62.708	154.668	208.461	107.76	Pistil extensin like protein, partial CDS only (AHRD V3.3 *-* Q7DLN2_TOBAC)
Solyc01g006400	3005.79	1933.19	5391.51	4011.02	2660.92	2968.24	3794.08	2122.47	Pistil extensin like protein, partial CDS only (AHRD V3.3 *-* Q7DLN2_TOBAC)
Solyc01g006410	0	0.021002	0	0	0	0.0556697	0.0508543	0.0489647	Pistil extensin like protein, partial CDS only (AHRD V3.3 *-* Q7DLN2_TOBAC)
Solyc01g006420	0	0	0.0573913	0	0.033375	0.0753727	0.559459	0.0716843	Unknown protein
Solyc01g006430	199.049	186.595	183.221	182.694	171.776	154.583	160.175	150.056	Fatty acid desaturase (AHRD V3.3 *** E7CCC0_9BRAS)
Solyc01g006440	0.312439	0.139373	0.192505	0.335005	21.1479	2.15115	0	0.0179183	Protein NRT1/ PTR FAMILY 7.1 (AHRD V3.3 *** A0A1U8GXZ4_CAPAN)
Solyc01g006450	40.2531	39.6062	42.6777	49.285	47.1366	41.7739	52.6422	41.4315	Enoyl-[acyl-carrier-protein] reductase [NADH], chloroplastic (AHRD V3.3 *** A0A2G3DE80_CAPCH)
Solyc01g006460	0	0	0.008803	0.0156073	0.943771	0.178646	0	0	Non-structural maintenance of chromosomes element 4-like protein B (AHRD V3.3 *** A0A2G3DE98_CAPCH)
Solyc01g006480	8.60219	8.57586	9.88767	11.0311	8.76442	13.0105	13.4078	12.2264	Alpha/beta-Hydrolases superfamily protein (AHRD V3.3 *** Q8GYI7_ARATH)
Solyc01g006490	4.11404	3.94813	5.17952	5.28784	6.56108	6.70378	6.49782	7.1725	UPF0061 protein (AHRD V3.3 *** A0A2G2XP25_CAPBA)
Solyc01g006500	7.23226	7.1637	6.04733	6.45425	4.65372	5.61037	6.37545	7.6267	Pentatricopeptide repeat-containing protein (AHRD V3.3 *** A0A2I0XE98_9ASPA)
Solyc01g006510	71.6936	70.9938	35.5424	46.9099	32.219	31.0606	30.9406	32.5817	sorbitol related enzyme
Solyc01g006520	2.64584	3.36819	0.877462	1.80112	0.337874	0.472006	0.481488	0.669074	Receptor-like protein kinase (AHRD V3.3 *** A0A2U1PPA0_ARTAN)
Solyc01g006530	0	0	0	0	0	0	0	0	Receptor-like protein kinase (AHRD V3.3 *** A0A2U1PPA0_ARTAN)
Solyc01g006540	43.7459	55.878	11.7685	36.8272	0.365661	45.7495	16.9971	26.5981	lipoxygenase C
Solyc01g006550	0.696815	0.654405	0	0.00788533	0.00730567	0	0	0	Receptor-like protein Cf-9 homolog (AHRD V3.3 *** CF0_SOLLC)
Solyc01g006555	60.0886	107.59	6.15557	14.8707	0.0468657	0.502296	1.15891	1.33732	Lipoxygenase (AHRD V3.3 *** C0KKU8_SOLLC)
Solyc01g006580	0.140209	0.130483	0.0182027	0.0225207	0.00843767	0.789362	0.324426	0.33286	2-oxoglutarate (2OG) and Fe(II)-dependent oxygenase superfamily protein (AHRD V3.3 *** A0A2U1LXD5_ARTAN)
Solyc01g006585	0.275935	0.136559	0	0	0	0	0	0.014905	2-oxoglutarate (2OG) and Fe(II)-dependent oxygenase superfamily protein (AHRD V3.3 *** A0A2U1LXD5_ARTAN)
Solyc01g006590	0	0	0	0	0	0	0	0	Receptor-like protein kinase (AHRD V3.3 *** A0A2U1PPA0_ARTAN)
Solyc01g006600	0	0	0	0	0	0	0	0	AMP-dependent synthetase/ligase (AHRD V3.3 *** A0A2U1PR62_ARTAN)
Solyc01g006610	0	0	0	0	0.0385427	0	0	0	2-oxoglutarate (2OG) and Fe(II)-dependent oxygenase superfamily protein (AHRD V3.3 *** A0A2U1LXD5_ARTAN)
Solyc01g006620	0.00894333	0	0	0	0.0699613	0.015101	0	0.0441507	C2 calcium/lipid-binding plant phosphoribosyltransferase family protein (AHRD V3.3 *** A0A061DXG0_THECC)
Solyc01g006630	20.2137	20.2049	21.323	23.6046	25.7932	30.3486	33.0663	31.8255	NAD(P)-binding Rossmann-fold superfamily protein (AHRD V3.3 *** A0A2U1KNW2_ARTAN)
Solyc01g006640	0.005029	0	0	0	0.00271233	0	0	0	AMP-dependent synthetase/ligase (AHRD V3.3 *** A0A2U1PR62_ARTAN)
Solyc01g006650	0.640049	0.660932	0.431166	0.57381	1.1705	0.85709	1.2186	1.17637	ETHYLENE INSENSITIVE 3-like 3 protein (AHRD V3.3 *** A0A2G3DES0_CAPCH)
Solyc01g006660	2.61909	3.31807	0.305074	0.76427	0.675158	0.230475	0.489349	0.526434	Subtilisin-like protease (AHRD V3.3 *** A0A2I0XJ46_9ASPA)
Solyc01g006670	4.04002	7.79456	0.992037	1.77636	1.2371	1.79923	1.35134	2.29485	Glycosyltransferase (AHRD V3.3 *** A0A2I4H5S7_9ROSI)
Solyc01g006680	28.8438	43.1846	16.1333	22.9153	14.1128	25.1419	24.3384	31.1127	2-oxoglutarate (2OG) and Fe(II)-dependent oxygenase superfamily protein (AHRD V3.3 *** A0A2U1NBL4_ARTAN)
Solyc01g006690	14.3405	15.8272	13.3174	21.8183	2.24098	7.22075	7.40334	10.6704	IRK-interacting protein (AHRD V3.3 *** A0A2I4FH54_9ROSI)
Solyc01g006700	10.8518	10.8713	14.8679	11.7189	13.6758	20.7514	29.0144	30.8833	downstream neighbor of Son (AHRD V3.3 *** AT3G54750.4)
Solyc01g006710	5.69622	5.06747	4.56546	4.17361	8.06478	7.71295	11.8945	12.8126	Helicase (AHRD V3.3 *** A0A200PRN8_9MAGN)
Solyc01g006720	14.5793	10.4639	5.32071	5.4762	1.75964	2.05144	1.36525	2.1682	ABC transporter G family member 27 (AHRD V3.3 *** A0A2G2VCM9_CAPBA)
Solyc01g006730	0.201049	0.079414	0.180004	0.0193783	2.54247	0.618465	0.141496	0.0590357	Calcium-dependent protein kinase (AHRD V3.3 *** B8QUH1_GOSHI)
Solyc01g006740	4.13832	4.60914	4.18827	4.65803	4.31939	4.72795	5.33936	5.37604	Sucrose-phosphatase (AHRD V3.3 *** Q84ZX6_SOLLC)
Solyc01g006750	0.577071	0.387672	0.615372	0.181828	0.670241	0.238492	0	0.030892	Unknown protein
Solyc01g006760	0.0573697	0.0366937	0.0193997	0	0.0823907	0.0472157	0	0	Transmembrane protein (AHRD V3.3 *** Q9FT46_ARATH)
Solyc01g006770	0	0	0	0	0.012661	0	0	0	DUF604 domain-containing protein (AHRD V3.3 *** A0A1Q3CIC6_CEPFO)
Solyc01g006780	2.78176	2.33711	6.11612	5.39299	4.53387	4.09219	4.12735	3.01837	Unknown protein
Solyc01g006790	8.23176	6.11964	10.5794	8.80369	8.85594	6.80423	7.45803	4.95317	hypothetical protein (AHRD V3.3 *-* AT2G27180.1)
Solyc01g006800	28.1884	28.6007	31.4103	32.4088	39.5291	43.4602	48.2761	44.7956	Methionine aminopeptidase 2 (AHRD V3.3 *** A0A2G3AXU8_CAPCH)
Solyc01g006810	10.6654	11.2543	9.10545	11.348	19.1684	12.8376	12.8501	13.7854	E3 ubiquitin-protein ligase RHF2A-like (AHRD V3.3 *** A0A2I4GY35_9ROSI)
Solyc01g006820	49.7133	48.4259	43.9604	66.3107	29.5795	33.9951	33.7675	47.3915	Unknown protein
Solyc01g006830	44.452	45.7119	33.2594	43.9715	24.0672	42.682	39.1687	44.7497	Protein WVD2-like 1 (AHRD V3.3 *** A0A2G3AXV0_CAPCH)
Solyc01g006840	0.0405387	0.00538367	0.0166743	0.11634	0.998725	0.617123	0.078858	0.0995117	Calcium-dependent protein kinase (AHRD V3.3 *** B8QUH1_GOSHI)
Solyc01g006845	0	0	0	0	0.098125	0.0123543	0	0	Unknown protein
Solyc01g006850	0.789414	1.09605	0.996282	0.823021	0.731273	1.1137	1.45641	1.80714	Pentatricopeptide repeat (AHRD V3.3 *** A0A200Q9W7_9MAGN)
Solyc01g006860	12.9496	12.9867	11.8882	13.9218	19.6743	18.0992	19.8228	17.8556	Co-chaperone, HscB-like protein (AHRD V3.3 *** A8IK66_CHLRE)
Solyc01g006870	9.47468	8.39635	6.72332	8.19612	7.98327	6.84103	7.86191	8.31155	Polyketide cyclase/dehydrase/lipid transport superfamily protein (AHRD V3.3 *** F4K3U5_ARATH)
Solyc01g006880	2.6322	2.58262	2.65989	2.4184	7.26715	4.13091	6.61432	9.25369	Histone-lysine N-methyltransferase ATXR7 (AHRD V3.3 *-* A0A2G3AXS4_CAPCH)
Solyc01g006890	7.12268	7.03188	9.80328	9.8277	12.4187	14.7377	18.4787	20.7472	EEIG1/EHBP1 N-terminal domain (AHRD V3.3 *** A0A200Q9Q9_9MAGN)
Solyc01g006900	488.364	506.767	1230.47	1331.51	465.358	866.861	536.872	521.597	MD-2-related lipid recognition domain-containing protein / ML domain-containing protein (AHRD V3.3 *** A0A2U1NF61_ARTAN)
Solyc01g006910	0.126851	0.054528	0	0	0	0	0	0	RING/U-box superfamily protein (AHRD V3.3 *** A0A2U1MY73_ARTAN)
Solyc01g006920	0.257586	0.461987	0.421912	0.35727	0.434604	0.572668	0.926239	1.23204	Pentatricopeptide repeat-containing protein (AHRD V3.3 *** A0A2G2XTB6_CAPBA)
Solyc01g006930	4.24095	4.70453	2.2823	1.71599	0.999474	3.4382	5.63422	5.56821	Nuclear transcription factor Y subunit A-4 (AHRD V3.3 *** A0A2G2XTD6_CAPBA)
Solyc01g006940	98.2147	107.528	41.9665	54.9595	23.4931	32.1123	29.4768	27.5725	RNA-binding protein CP33, chloroplastic (AHRD V3.3 *-* A0A1J3GQ27_NOCCA)
Solyc01g006950	0.802733	0.620614	0.101059	0.201463	0.344984	0.131082	0.118681	0.158089	syntaxin-121-like (AHRD V3.3 *** A0A2I4H4W7_9ROSI)
Solyc01g006960	6.19934	5.57334	5.53569	6.43562	8.9322	8.29106	11.4483	12.3207	Trafficking protein particle complex subunit 8 (AHRD V3.3 *** A0A1J3IJK6_NOCCA)
Solyc01g006970	7.23107	6.54414	6.88734	7.15671	9.50606	10.2386	15.6332	16.8147	RNA helicase family protein (AHRD V3.3 *** A0A2U1PBZ9_ARTAN)
Solyc01g006980	47.9551	50.3771	48.593	50.8484	50.8587	56.644	52.6149	46.8735	Malonyl CoA-acyl carrier protein transacylase containing protein, expressed (AHRD V3.3 *** Q10MS3_ORYSJ)
Solyc01g006990	8.86224	8.22912	10.6242	9.4711	13.4539	11.7427	11.2957	13.6028	F-box family protein (AHRD V3.3 *** E5GBH4_CUCME)
Solyc01g007000	7.60754	3.90054	0.535542	1.18153	0.14647	0.056289	0.759939	0.270626	RING-type E3 ubiquitin transferase (AHRD V3.3 *** Q3HLY8_CAPAN)
Solyc01g007010	5.12282	2.92706	0.686806	1.58199	0.0847507	0.104858	0.324225	0.229864	RING-type E3 ubiquitin transferase (AHRD V3.3 *** Q3HLY8_CAPAN)
Solyc01g007020	7.90509	3.77898	0.644877	1.11961	0.037067	0.064584	0.07465	0.0374953	RING-type E3 ubiquitin transferase (AHRD V3.3 *** Q3HLY8_CAPAN)
Solyc01g007030	25.9448	17.6278	0	0	0	0.309479	0	0.0958437	RING-type E3 ubiquitin transferase (AHRD V3.3 *** Q3HLY8_CAPAN)
Solyc01g007040	17.6379	10.9156	2.60033	3.52108	0.255199	0.212356	1.15896	1.30212	RING-type E3 ubiquitin transferase (AHRD V3.3 *-* A0A2G3AY39_CAPCH)
Solyc01g007050	0.0442127	0.0290117	0	0	0.015018	0	0	0	RING-type E3 ubiquitin transferase (AHRD V3.3 *** A0A2G3AY50_CAPCH)
Solyc01g007060	8.49241	8.87427	9.25804	8.82564	8.18342	11.8365	14.2749	14.3988	BTB/POZ domain-containing protein (AHRD V3.3 *** A0A2G3AY53_CAPCH)
Solyc01g007070	19.7818	25.2086	6.71016	11.6747	6.0894	13.9181	15.2292	25.7248	BEL1-like homeodomain protein 3 (AHRD V3.3 *** A0A2G3AY56_CAPCH)
Solyc01g007080	0.702078	1.22957	0.0530633	0.276693	0	0	0	0	Aluminum-activated malate transporter (AHRD V3.3 *** A0A2U1PS47_ARTAN)
Solyc01g007090	0.0145407	0.00409167	0	0	0.12145	0.0244037	0	0	Aluminum-activated malate transporter (AHRD V3.3 *** A0A200Q9N0_9MAGN)
Solyc01g007100	24.2523	20.2924	10.9963	12.2773	8.91708	11.8828	14.692	16.578	Digalactosyldiacylglycerol synthase 1, chloroplastic (AHRD V3.3 *** A0A1U8EIN3_CAPAN)
Solyc01g007110	37.1407	34.6273	43.8989	42.086	36.9033	41.919	47.9307	39.8892	LRAT-like domain (AHRD V3.3 *** A0A200Q9S3_9MAGN)
Solyc01g007120	10.8886	11.1242	12.2056	11.3201	14.7284	14.1726	15.7891	15.3449	Protein serine/threonine kinase (AHRD V3.3 *** F4J3A9_ARATH)
Solyc01g007130	8.02162	7.37408	10.14	10.1676	4.93895	9.21456	13.0859	14.0555	Receptor protein kinase (AHRD V3.3 *** A0A2R6R7M6_ACTCH)
Solyc01g007140	2.40051	2.74253	2.78137	2.52718	4.99413	4.88863	6.68095	7.12459	ARM repeat superfamily protein (AHRD V3.3 *** AT5G06350.2)
Solyc01g007150	24.3571	23.3362	30.274	34.2599	30.7276	37.4669	42.4032	49.079	Coatomer subunit beta (AHRD V3.3 *** A0A1U8EGF1_CAPAN)
Solyc01g007160	1.40658	1.43541	2.10406	1.72939	1.4867	2.26715	4.4395	3.40432	protein CHROMOSOME TRANSMISSION FIDELITY 7 (AHRD V3.3 *** A0A2I4GQF6_9ROSI)
Solyc01g007170	1.76193	1.70609	4.81143	2.69494	1.04263	4.65548	8.33052	7.93992	C2 calcium/lipid-binding plant phosphoribosyltransferase family protein (AHRD V3.3 *** A0A061F065_THECC)
Solyc01g007180	4.37886	5.76524	5.71734	6.91708	8.83058	8.78054	6.98523	7.87638	Spc97/Spc98 family of spindle pole body (SBP) component (AHRD V3.3 *** A0A2K3MUW2_TRIPR)
Solyc01g007190	4.32321	5.2651	4.23802	3.32257	30.1258	5.32543	3.14941	3.55256	Unknown protein
Solyc01g007200	0.700015	0.543739	16.4349	6.77895	7.51206	46.564	79.6552	66.3119	Unknown protein
Solyc01g007210	0	0	0	0	0.0193787	0	0	0	Unknown protein
Solyc01g007220	39.3127	47.5602	10.4809	16.2656	29.6712	19.7108	7.12438	10.9222	Late embryogenesis abundant (LEA) hydroxyproline-rich glycoprotein family (AHRD V3.3 *** Q9SVC8_ARATH)
Solyc01g007230	14.986	15.8115	29.5893	23.6313	71.7995	32.7836	23.5706	23.5024	Late embryogenesis abundant (LEA) hydroxyproline-rich glycoprotein family (AHRD V3.3 *** A0A2U1KP17_ARTAN)
Solyc01g007240	0.0710357	0	0.219412	0.0210517	0.393033	0.0628307	0.146732	0.143893	Late embryogenesis abundant (LEA) hydroxyproline-rich glycoprotein family (AHRD V3.3 *** O82294_ARATH)
Solyc01g007250	10.0219	10.3562	10.7678	10.0654	17.1371	15.2091	16.1099	15.6196	U3 small nucleolar ribonucleoprotein imp4 (BRIX domain-containing protein) (AHRD V3.3 *** A0A166XUR7_9PEZI)
Solyc01g007260	0.688151	0.796708	3.35784	4.09526	4.23744	2.98503	4.07861	4.68091	Double Clp-N motif-containing P-loop nucleoside triphosphate hydrolases superfamily protein (AHRD V3.3 *** A0A2U1KPR9_ARTAN)
Solyc01g007263	0	0	0.314299	0.101062	0.850715	0.328153	1.37031	1.16755	Cytokinin riboside 5'-monophosphate phosphoribohydrolase (AHRD V3.3 *** A0A0A1WDM2_NICAT)
Solyc01g007267	1.21766	1.00681	1.41179	1.06594	2.33701	2.0957	2.24777	2.80831	Pentatricopeptide repeat (AHRD V3.3 *** A0A200Q9X6_9MAGN)
Solyc01g007740	62.7857	67.5671	49.0996	62.8603	35.2122	56.0179	50.8924	44.9957	2-Cys peroxiredoxin (AHRD V3.3 *** G1JT83_VITVI)
Solyc01g007750	16.4369	15.6089	8.79594	10.3901	5.85728	10.167	11.5732	11.494	Mitochondrial transcription termination factor family protein (AHRD V3.3 *** O64685_ARATH)
Solyc01g007760	5.99305	5.62178	6.55635	5.76128	10.0929	11.0435	14.2895	13.9884	Transcription factor E2FA (AHRD V3.3 *** A0A2G2XS87_CAPBA)
Solyc01g007770	10.7593	7.84946	7.24543	7.61182	8.12047	6.2884	4.43782	4.04963	hypothetical protein (AHRD V3.3 *** AT5G06280.3)
Solyc01g007780	2.73361	3.01629	2.17873	2.63342	4.85554	2.33391	2.10829	2.00337	HVA22-like protein (AHRD V3.3 *** A0A2G3AY13_CAPCH)
Solyc01g007790	8.25849	8.31318	14.5249	12.3304	27.3449	14.5995	13.5855	13.4858	alpha/beta-Hydrolases superfamily protein (AHRD V3.3 *** AT3G11620.8)
Solyc01g007800	3.29695	3.07401	15.3711	15.1813	2.1201	6.1806	9.72323	6.58769	ovate family protein 2
Solyc01g007810	3.24836	2.22945	17.2696	20.8152	1.93034	4.85473	5.84392	5.80227	ovate family protein 3
Solyc01g007830	0.0939207	0.0311593	0.119279	0.3026	0.217259	0.0595517	0.533606	0.853488	Condensin complex subunit 2 (AHRD V3.3 *-* A0A2G3C0A3_CAPCH)
Solyc01g007840	14.8323	16.1088	21.7122	20.4485	27.7176	27.2445	22.5719	18.868	Polynucleotidyl transferase, ribonuclease H-like superfamily protein (AHRD V3.3 *** A0A2U1M9A7_ARTAN)
Solyc01g007850	2.08294	1.92098	2.05398	2.30242	3.91498	2.69711	3.40588	4.59049	Pentatricopeptide repeat (AHRD V3.3 *** A0A200QMV9_9MAGN)
Solyc01g007860	148.945	197.934	173.666	212.454	106.773	215.221	192.719	200.758	Ubiquitin-conjugating enzyme variant (AHRD V3.3 *** C8CP48_CITSI)
Solyc01g007870	2.7141	1.95541	17.2774	22.2999	8.08608	73.0344	53.5258	52.7417	hypothetical protein (AHRD V3.3 *** AT5G06270.2)
Solyc01g007880	6.42907	5.81177	4.78634	5.50319	3.76055	6.34635	9.38121	10.7657	Phosphatidylinositol 4-phosphate 5-kinase (AHRD V3.3 *-* D7KW77_ARALL)
Solyc01g007890	13.7795	14.2414	8.14958	7.93474	4.26592	8.52999	15.0022	16.7281	Protein indeterminate-domain 5, chloroplastic (AHRD V3.3 *-* A0A2G3AYF3_CAPCH)
Solyc01g007900	8.23565	6.83081	11.1207	10.329	9.63211	12.5053	17.9238	17.8227	Tobamovirus multiplication protein 3 (AHRD V3.3 *** A0A2G3CF46_CAPCH)
Solyc01g007910	38.7318	38.8948	39.7981	39.9486	56.1793	47.1483	35.6505	33.3579	succinyl-CoA ligase alpha 1 subunit
Solyc01g007920	17.1582	20.2088	12.2131	14.2571	8.05214	8.46213	4.81128	6.33482	Isochorismatase-like (AHRD V3.3 *** A0A200QJT4_9MAGN)
Solyc01g007930	11.1765	12.1551	12.9453	14.0208	12.6397	16.7086	15.6098	16.8755	F-box protein (AHRD V3.3 *** A0A2G2XSM3_CAPBA)
Solyc01g007940	0.00334333	0	0.125479	0	0.907294	0.116299	0	0	Alanine aminotransferase 2 (AHRD V3.3 *** A0A2G2YVW4_CAPAN)
Solyc01g007950	3.07613	2.62903	4.55018	3.37321	48.5938	5.809	4.31991	3.59441	Peroxidase (AHRD V3.3 *** K4ASZ3_SOLLC)
Solyc01g007960	0.0171413	0.03041	0	0	0.0232417	0	0	0	Cysteine-rich receptor-like protein kinase 2 (AHRD V3.3 *** A0A2G2YVX5_CAPAN)
Solyc01g007970	0.00755667	0.0209653	0	0	0	0	0	0	Cysteine-rich receptor-like protein kinase 2 (AHRD V3.3 *** A0A2G2YVX5_CAPAN)
Solyc01g007980	4.77148	4.71936	1.00136	1.36123	1.33986	1.20882	1.74345	2.52133	Cysteine-rich receptor-like protein kinase 2 (AHRD V3.3 *** A0A2G2YVX5_CAPAN)
Solyc01g007990	4.08832	3.78635	3.87425	4.16635	3.75599	5.22418	6.88293	7.42818	Cysteine-rich receptor-like protein kinase 2 (AHRD V3.3 *** A0A2G2XSC5_CAPBA)
Solyc01g008000	214.316	235.26	330.453	406.718	178.17	354.637	312.521	316.036	ADP-ribosylation factor (AHRD V3.3 *** A0A2U1LV56_ARTAN)
Solyc01g008010	21.856	19.172	16.1261	16.2284	11.8877	11.4716	12.5624	11.3807	DUF220 domain-containing protein (AHRD V3.3 *** A0A1Q3AZ34_CEPFO)
Solyc01g008020	32.5418	34.8445	34.1672	46.098	34.9748	34.9799	30.5486	30.6058	Equilibrative nucleotide transporter 1 (AHRD V3.3 *** A0A2G3AYC6_CAPCH)
Solyc01g008040	0.273749	0.142179	0.183284	0.340036	0.436709	0.0746007	0.013069	0.063507	F-box protein (AHRD V3.3 *** A0A2K3P6V3_TRIPR)
Solyc01g008050	0.0628027	0	0.0109293	0	5.81489	1.01851	0.00929267	0	TRICHOME BIREFRINGENCE-LIKE 27 (AHRD V3.3 *** A0A2U1P3B7_ARTAN)
Solyc01g008060	24.7251	25.9466	28.376	27.1908	33.1374	38.6956	39.8149	37.9733	Ribonuclease H (AHRD V3.3 *** A0A2U1P3J3_ARTAN)
Solyc01g008070	27.1078	30.8414	17.2911	20.6309	59.8356	14.1625	10.6435	11.0756	Plant/MCA23-20 protein (AHRD V3.3 *** G7LJD0_MEDTR)
Solyc01g008080	537.424	588.41	880.274	919.586	358.757	894.011	693.79	602.063	40S ribosomal protein S27 (AHRD V3.3 *** S8E0G1_9LAMI)
Solyc01g008090	428.242	432.537	495.531	442.644	397.406	530.714	479.188	363.986	40S ribosomal protein S27 (AHRD V3.3 *** S8E0G1_9LAMI)
Solyc01g008100	41.9144	42.2884	93.4501	61.7857	236.065	75.6655	37.3988	38.6639	Transferring glycosyl group transferase (AHRD V3.3 *** Q8L9Q7_ARATH)
Solyc01g008110	325.403	185.245	583.116	435.727	234.052	345.08	292.031	259.987	Cytochrome P450 (AHRD V3.3 *** A0A200R3Q9_9MAGN)
Solyc01g008120	8.25704	7.9293	8.76326	7.33346	12.5582	10.5605	17.35	20.1124	Histone acetyltransferase HAC12 (AHRD V3.3 *** A0A1U8E264_CAPAN)
Solyc01g008130	2.73296	2.54228	2.93009	2.12497	2.16724	3.91605	4.97573	4.46638	Glutaredoxin-related protein (AHRD V3.3 *** A0A2U1PBW7_ARTAN)
Solyc01g008140	8.99519	9.85242	8.03429	9.82439	7.88559	9.3796	10.4742	13.3788	Phytosulfokine receptor 1 (AHRD V3.3 *** A0A2G2YWA1_CAPAN)
Solyc01g008150	2.40067	0.867763	0.206256	0	0.244098	0.621981	0.613776	0.367873	Unknown protein
Solyc01g008160	22.6421	28.8492	21.0534	21.124	18.0922	20.7565	20.1861	20.008	Protein SLOW GREEN 1, chloroplastic (AHRD V3.3 *** A0A2G2YVV0_CAPAN)
Solyc01g008170	14.7334	15.4879	17.8682	16.2178	24.1863	26.7226	29.213	30.9749	Zinc finger transcription factor 5
Solyc01g008180	12.616	13.7491	19.3053	20.642	22.3592	27.6217	31.6521	33.1692	Remorin (AHRD V3.3 *** A0A200QBN3_9MAGN)
Solyc01g008190	5.42837	4.94949	8.36401	7.36448	11.5511	12.0441	10.9361	11.6111	INO80 complex subunit D-like (AHRD V3.3 *-* A0A2K3PJC0_TRIPR)
Solyc01g008200	5.61572	6.23072	6.39118	6.25896	8.64905	9.7659	8.78303	9.47051	INO80 complex subunit D-like (AHRD V3.3 *-* A0A2I4G7W4_9ROSI)
Solyc01g008220	1.8107	1.27853	2.12998	2.4575	9.53803	3.15043	6.01432	6.88034	UPF0664 stress-induced protein C29B12.11c (AHRD V3.3 *** A0A1J3H3L4_NOCCA)
Solyc01g008230	62.2892	53.9318	101.373	107.754	22.9531	54.5574	67.6041	74.5182	TCP transcription factor 15
Solyc01g008240	0.455304	0.271487	0.870589	0.213852	63.7786	5.09996	0	0.026198	Sugar transporter protein 9
Solyc01g008250	81.4993	87.9693	25.5904	31.8411	13.8617	20.2246	19.2357	17.0439	Thioredoxin (AHRD V3.3 *** A0A2U1L6U5_ARTAN)
Solyc01g008260	13.9409	15.3497	15.8749	16.8195	15.9083	20.455	17.6483	16.3616	E2F-associated phosphoprotein (AHRD V3.3 *** A0A2I4ECY9_9ROSI)
Solyc01g008270	47.6543	49.3968	76.058	71.4007	70.9924	97.581	96.9107	81.6403	Prefoldin subunit 5 (AHRD V3.3 *** B6TVU2_MAIZE)
Solyc01g008280	11.4189	12.1872	13.0626	12.305	18.3558	21.0781	21.2903	21.802	Serine/threonine-protein phosphatase 2A activator (AHRD V3.3 *** A0A2G3AYA9_CAPCH)
Solyc01g008290	7.57226	8.2986	7.14152	6.94184	14.5368	9.13521	10.1959	9.03594	Dihydroorotate dehydrogenase (quinone), mitochondrial (AHRD V3.3 *** A0A1U8E220_CAPAN)
Solyc01g008300	0.858421	1.64809	1.17585	2.23151	1.2015	1.43096	1.49665	1.43035	HXXXD-type acyl-transferase family protein (AHRD V3.3 *** F4JBC7_ARATH)
Solyc01g008310	28.1189	26.1194	28.8782	29.2108	39.479	36.9005	47.7904	49.7504	Phenylalanine--tRNA ligase beta subunit (AHRD V3.3 *** A0A0G2HIH6_9PEZI)
Solyc01g008320	5.76175	4.75124	3.99789	3.9653	10.3149	6.3191	9.34023	10.4315	Shoot gravitropism 2 (SGR2) protein (AHRD V3.3 *** A0A072UJS6_MEDTR)
Solyc01g008330	53.9168	52.3638	74.7675	51.1599	108.013	66.9846	53.6765	53.4238	Biotin carboxylase (AHRD V3.3 *** B5LAS7_CAPAN)
Solyc01g008340	13.7764	13.058	15.5265	14.8173	22.8939	22.4867	21.2627	19.378	L19 ribosomal protein
Solyc01g008360	60.1618	65.554	104.537	105.305	74.7125	119.857	96.4184	87.9424	RNA binding protein (AHRD V3.3 *** B3TLZ0_ELAGV)
Solyc01g008370	93.2474	95.5709	135.757	137.598	110.789	150.378	148.268	144.431	26S proteasome non-ATPase regulatory subunit 7 (AHRD V3.3 *** A0A2G3AYA8_CAPCH)
Solyc01g008390	0	0.00442767	0	0	0	0.006014	0	0.00637867	Hcr9-OR2C (AHRD V3.3 *** Q4VSU3_SOLPI)
Solyc01g008400	1.0913	0.63759	0.214765	0.371903	0.542342	0.689636	0.993177	1.52422	Unknown protein
Solyc01g008410	0.00714567	0.00901733	0	0	0.046534	0.00827533	0.00683333	0.074458	Hcr9-OR2C (AHRD V3.3 *** Q4VSU3_SOLPI)
Solyc01g008420	2.08961	2.28359	2.19442	3.53271	0.560656	0.55379	0.477344	0.900791	Protein DETOXIFICATION (AHRD V3.3 *** S6BP63_TOBAC)
Solyc01g008425	0.00729733	0	0	0	0	0	0	0	Unknown protein
Solyc01g008440	7.11683	6.48852	5.45871	5.75681	14.6677	8.03596	7.8245	9.68752	Calcium-dependent protein kinase (AHRD V3.3 *** B2KTB2_WHEAT)
Solyc01g008450	0.074566	0.165804	0.04397	0	0.565141	0.095582	0.076369	0.0558323	2Fe-2S ferredoxin (AHRD V3.3 *-* A0A2G3AI40_CAPAN)
Solyc01g008460	13.7774	15.7457	12.4538	14.2356	22.3419	18.6762	15.6185	15.6765	2Fe-2S ferredoxin (AHRD V3.3 *** A0A2G3B9S5_CAPCH)
Solyc01g008470	10.4493	10.5606	18.6396	16.4992	24.6053	24.2867	22.4154	20.804	Translocation protein Sec62 (AHRD V3.3 *** A0A200QIN6_9MAGN)
Solyc01g008473	0	0	0	0	0	0	0	0	Unknown protein
Solyc01g008475	0	0	0	0	0	0	0	0	Unknown protein
Solyc01g008477	0	0	0	0	0	0	0	0	Unknown protein
Solyc01g008479	0	0	0	0	0	0	0	0	Unknown protein
Solyc01g008480	2.33924	2.05525	1.57946	1.80639	2.76951	2.43587	4.18942	4.21363	Pentatricopeptide repeat (AHRD V3.3 *** A0A200Q273_9MAGN)
Solyc01g008490	5.43457	5.64642	5.76464	5.71294	13.9572	7.64892	8.38965	8.57154	Nuclear transcription factor Y subunit A-7 (AHRD V3.3 *** A0A2G2XP63_CAPBA)
Solyc01g008500	0.294583	0.652897	0.0820583	0.140825	0.286907	0.20394	0.386302	0.43699	Receptor-like protein kinase (AHRD V3.3 *** A0A2K3L8M9_TRIPR)
Solyc01g008510	0.0203713	0.11465	0	0	0	0	0	0	photosystem II 5 kDa protein, chloroplastic-like (AHRD V3.3 *-* A0A2I4GVV4_9ROSI)
Solyc01g008520	2.05622	1.49089	2.17474	2.22604	2.2614	3.37269	3.93611	5.14182	Homolog of X-ray repair cross complementing 2 (XRCC2) (AHRD V3.3 *** A0A1P8BBF2_ARATH)
Solyc01g008530	14.7782	16.461	18.2748	7.65048	30.7314	27.8236	24.0271	24.903	phenylacetaldehyde reductase 1
Solyc01g008540	0	0	0.286309	0	0.016105	0.631931	2.9273	2.67252	Cinnamoyl-CoA reductase 1 (AHRD V3.3 *** A0A2G2XPA3_CAPBA)
Solyc01g008550	131.603	144.227	157.083	164.486	118.754	183.957	185.789	174.399	phenylacetaldehyde reductase 2
Solyc01g008560	21.1811	18.1671	13.7452	14.8853	14.6335	15.458	18.7086	17.1199	NAD kinase (AHRD V3.3 *** F2Z9R4_NICBE)
Solyc01g008570	0	0	0	0	0	0	0	0	Receptor-like protein kinase (AHRD V3.3 *** A0A2K3N885_TRIPR)
Solyc01g008580	0	0	0	0	0	0	0.026386	0	Zinc transporter protein (AHRD V3.3 *** A5BDR3_VITVI)
Solyc01g008590	0	0	0	0	0	0	0.0329837	0	Zinc transporter protein (AHRD V3.3 *-* A5BDR3_VITVI)
Solyc01g008600	18.288	14.5691	26.458	12.3952	27.7936	51.5568	86.7529	89.6567	Zinc finger transcription factor 6
Solyc01g008610	0	0	0.03424	0.0365397	0.039938	9.28649	12.2098	18.8541	Glucan endo-1,3-beta-glucosidase (AHRD V3.3 *** E13D_TOBAC)
Solyc01g008620	6.99391	5.27358	0	0.0310767	0.132512	0.907794	0.193324	0.264449	Glucan endo-1,3-beta-glucosidase (AHRD V3.3 *** A0A1U8FGD7_CAPAN)
Solyc01g008640	0	0	0	0	0	0	0	0	Cytochrome (AHRD V3.3 *** A0A1U8F0H8_CAPAN)
Solyc01g008650	0.0560653	0.0499933	0.156788	0.0773057	0.0686647	1.6494	0.99207	1.12049	Cytochrome (AHRD V3.3 *** A0A1U8F0H8_CAPAN)
Solyc01g008660	3.10957	3.4606	4.42479	3.1227	8.01732	11.82	10.846	10.969	F-box protein (AHRD V3.3 *** A0A2K3NCL9_TRIPR)
Solyc01g008670	15.8868	16.7054	6.60677	16.8467	2.38921	0.74508	0.051597	0.0840647	Cytochrome (AHRD V3.3 *** A0A1U8F0H8_CAPAN)
Solyc01g008680	0.247452	0.247442	0.159277	0.154521	2.57792	0.788582	0.237925	0.216301	S2 self-incompatibility locus-linked pollen 3.2 protein (AHRD V3.3 *** Q7XAE8_PETIN)
Solyc01g008690	0.189399	0.165953	0.0922673	0.0753147	0	0	0	0	GDP-mannose transporter (AHRD V3.3 *** A0A1B0VP09_ARATH)
Solyc01g008700	14.9003	15.943	13.712	14.1833	11.4338	18.148	21.5548	21.2198	MutS2 (AHRD V3.3 *** AT2G26840.1)
Solyc01g008710	0	0	0	0	0	0	0	0	mannan endo-1,4-beta-mannosidase
Solyc01g008720	0	0	0	0	0	0	0	0.015459	Mannan endo-1,4-beta-mannosidase 4 (AHRD V3.3 *** MAN4_SOLLC)
Solyc01g008730	8.62448	8.25384	9.54766	9.31524	17.4351	13.6854	16.0102	14.5873	BZIP transcription factor (AHRD V3.3 *** E9N3N2_9POAL)
Solyc01g008740	0.00760867	0	0	0	0.505638	0.013672	0	0.0146243	Calcium-dependent protein kinase (AHRD V3.3 *** B2KTB3_WHEAT)
Solyc01g008760	6.83645	7.79458	8.04778	7.50047	7.97426	10.2275	8.54369	8.07498	mediator-associated protein 2-like (AHRD V3.3 *** A0A1U8E6W4_CAPAN)
Solyc01g008770	16.6352	14.0761	17.2053	18.8552	11.6964	19.1036	29.4441	32.5639	Rho GTPase-activating protein 7 (AHRD V3.3 *** A0A2G3DEM8_CAPCH)
Solyc01g008780	35.4642	34.5815	21.372	25.4952	20.1594	22.8044	21.6742	24.0185	Phospholipase A2 family protein (AHRD V3.3 *** AT4G29070.2)
Solyc01g008790	22.6482	30.0283	28.0176	47.5567	24.818	28.8654	26.656	36.8801	Non-specific phospholipase C6 (AHRD V3.3 *** A0A2G3DF85_CAPCH)
Solyc01g008800	2.10503	2.4012	1.12697	1.54206	2.90285	1.46178	0.782831	1.01781	Disease resistance protein (TIR-NBS-LRR class) (AHRD V3.3 *** F4KIC7_ARATH)
Solyc01g008810	20.4381	20.8171	51.0431	42.5725	27.6473	44.413	43.6248	40.9422	RING/U-box superfamily protein (AHRD V3.3 *** AT5G19430.6)
Solyc01g008820	44.2404	44.6895	43.8059	39.9665	73.0248	61.0127	50.883	44.65	signal peptide peptidase-like (AHRD V3.3 *** A0A2I4FPX2_9ROSI)
Solyc01g008830	7.70115	9.02182	3.24364	4.36539	3.71669	0.432595	0.642707	0.87847	L-ascorbate oxidase (AHRD V3.3 *** A0A2G3AI57_CAPAN)
Solyc01g008840	24.8535	25.4492	26.4482	27.6851	35.4552	37.43	35.8838	38.2661	COP9 signalosome complex subunit 2 (AHRD V3.3 *** A0A2G2XP81_CAPBA)
Solyc01g008850	46.5598	54.7209	26.2906	42.2641	39.9525	35.1957	14.7059	19.985	Non-specific serine/threonine protein kinase (AHRD V3.3 *** A0A2G2XP60_CAPBA)
Solyc01g008860	0	0	0.026413	0	0	0.031386	0	0	Protein kinase APK1B, chloroplastic (AHRD V3.3 *** A0A2G3B9K0_CAPCH)
Solyc01g008870	0	0	0	0	0.0131093	0	0	0	Protein kinase APK1B, chloroplastic (AHRD V3.3 *** A0A2G3B9K0_CAPCH)
Solyc01g008880	0.00648667	0	0	0.0567357	0.837788	0.0577187	0	0	Solanum lycopersicum Cytokinin Response Factor 8
Solyc01g008890	7.6502	7.59959	7.2316	7.63961	7.79514	10.8959	11.5738	12.9734	Solanum lycopersicum Cytokinin Response Factor 3
Solyc01g008900	4.42545	4.58388	3.52467	3.75248	3.35779	5.19931	5.61414	5.58312	D-cysteine desulfhydrase 2, mitochondrial (AHRD V3.3 *** A0A2G3DF42_CAPCH)
Solyc01g008910	4.10551	3.72901	5.36977	5.30751	4.20782	10.2392	8.76104	10.8319	Transcription factor GRAS (AHRD V3.3 *** A0A200QIE7_9MAGN)
Solyc01g008920	14.6015	15.424	1.76011	3.03318	0.63837	1.39979	1.72261	1.95224	NAD(P)-binding Rossmann-fold superfamily protein (AHRD V3.3 *** A0A2U1L7S8_ARTAN)
Solyc01g008930	18.2685	18.9384	13.7164	14.2038	12.155	16.0834	16.0939	16.5677	AUREA phytochromobilin synthase
Solyc01g008940	12.4044	13.8909	0.565622	0.530619	6.47382	1.33284	0.234421	0.528214	Unknown protein
Solyc01g008950	207.345	213.144	337.946	326.236	227.891	388.769	349.3	313.252	Calmodulin 1
Solyc01g008960	119.659	115.776	195.753	175.635	186.351	341.294	455.579	487.695	Argonaute 4a
Solyc01g008970	124.44	116.754	179.821	169.527	132.4	196.174	254.778	277.833	RNA-binding (RRM/RBD/RNP motifs) family protein (AHRD V3.3 *-* F4IIL5_ARATH)
Solyc01g008980	7.20616	7.04029	7.97758	8.85289	8.71535	9.27474	10.2399	8.48952	Abscisic acid-insensitive 5-like protein (AHRD V3.3 *-* A0A2K3P2S8_TRIPR)
Solyc01g008990	7.59212	8.12468	12.369	10.6292	12.9642	16.6776	16.4889	16.5213	THO complex subunit 7B (AHRD V3.3 *** A0A1U8H3F7_CAPAN)
Solyc01g009000	35.7096	35.4832	57.8967	54.5467	19.2761	31.0128	28.0052	30.28	RING/U-box superfamily protein (AHRD V3.3 *** A0A1I9LQQ9_ARATH)
Solyc01g009010	76.7891	65.966	76.8929	72.504	28.9555	34.0434	33.7557	29.8373	4-diphosphocytidyl-2-C-methyl-D-erythritol kinase
Solyc01g009020	100.693	115.732	122.457	131.223	112.367	126.956	105.859	92.9133	Cysteine proteinase inhibitor (AHRD V3.3 *** A0A059TCI1_TOBAC)
Solyc01g009030	9.7741	9.76406	11.2179	11.7429	13.4508	14.0855	17.186	17.7617	dgd1 suppressor 1 (AHRD V3.3 *** AT5G12290.4)
Solyc01g009040	15.9855	16.8841	46.5894	31.3341	13.8211	54.7428	78.2848	73.8624	cyclinB1_4
Solyc01g009050	23.7442	22.5185	21.5616	22.6659	27.241	26.6083	27.8762	27.8656	Molybdopterin biosynthesis protein CNX1 (AHRD V3.3 *** A0A1U8HCP2_CAPAN)
Solyc01g009060	12.6055	12.8178	18.2956	16.8195	20.6831	21.9836	24.7445	26.4283	BTB-POZ and MATH domain protein (AHRD V3.3 *** B9VXZ7_CAPAN)
Solyc01g009070	4.13918	3.75594	2.72322	2.58949	24.0012	7.06242	9.82051	10.09	gamyb-like 1
Solyc01g009080	97.3832	71.3285	27.1001	25.4124	16.3207	16.1655	14.9801	12.0843	Zeaxanthin epoxidase, chloroplastic (AHRD V3.3 *** A0A1J3K020_NOCCA)
Solyc01g009090	22.3844	22.4972	28.8298	26.4563	31.8977	43.0121	52.7919	57.4595	Serrate RNA effector molecule (AHRD V3.3 *** A0A2G3AI64_CAPAN)
Solyc01g009100	158.172	165.235	216.6	179.189	194.213	209.24	195.675	147.636	60S ribosomal protein L30 (AHRD V3.3 *-* A0A2G2XP72_CAPBA)
Solyc01g009120	8.45829	8.7	3.83757	5.54249	3.80437	4.67438	5.61437	4.97221	Histone deacetylase (AHRD V3.3 *** A0A2G2ZNY2_CAPAN)
Solyc01g009140	0	0	0	0	0	0	0	0	Endoribonuclease Dicer-like protein 2 (AHRD V3.3 *-* A0A2G3B0Q1_CAPCH)
Solyc01g009145	6.83236	5.0788	5.84279	6.17904	6.61027	5.95177	8.08913	7.71665	Glycosyl hydrolase (AHRD V3.3 *-* D9ZCD8_9CARY)
Solyc01g009160	13.224	13.2505	7.28688	12.8958	5.49266	8.37134	6.15112	10.2574	Late embryogenesis abundant (LEA) hydroxyproline-rich glycoprotein family (AHRD V3.3 *** Q84VP8_ARATH)
Solyc01g009165	0	0	0	0	0	0	0	0	Retrovirus-related Pol polyprotein from transposon TNT 1-94 (AHRD V3.3 *-* A0A2K3LWA1_TRIPR)
Solyc01g009170	23.5356	23.9252	13.9719	16.3675	15.6194	18.7815	21.8144	27.817	EIL-EIN3/EIL
Solyc01g009180	11.9691	13.5363	12.8157	13.7742	16.3109	15.8053	17.374	18.1658	5-methyltetrahydropteroyltriglutamate--homocysteine methyltransferase (AHRD V3.3 *** A0A2G3DF96_CAPCH)
Solyc01g009190	0.0571517	0.147324	0.246842	0.113707	1.99329	2.85968	0.358925	0.110268	Double-stranded RNA-binding protein 1 (AHRD V3.3 *** A0A2G2XPP0_CAPBA)
Solyc01g009200	8.79183	12.493	6.97807	13.9604	1.92657	6.11508	3.85532	5.5508	inactive protein RESTRICTED TEV MOVEMENT 2-like (AHRD V3.3 *-* A0A2I4GKR2_9ROSI)
Solyc01g009210	0	0	0	0.184228	0.172606	0.0737493	0	0	Unknown protein
Solyc01g009220	5.86814	7.47275	4.95598	8.67272	0.750946	2.1302	1.62167	1.94978	inactive protein RESTRICTED TEV MOVEMENT 2-like (AHRD V3.3 *** A0A2I4H6X9_9ROSI)
Solyc01g009230	5.55299	5.20792	4.31019	4.99214	2.22979	3.00448	3.74094	4.5887	sitiens
Solyc01g009240	0.470095	0.406395	10.7301	1.09396	33.1091	6.15729	0.0828623	0.403925	Glycosyl hydrolase family protein (AHRD V3.3 *** A0A2U1QCD6_ARTAN)
Solyc01g009245	37.9411	45.19	21.222	32.6458	6.01307	14.9281	8.89477	10.2453	Chlororespiratory reduction 42 (AHRD V3.3 *** A0A0F7J401_9ROSI)
Solyc01g009250	1.44075	1.10166	0.763217	1.04726	1.41893	2.1843	1.32285	2.19963	hypothetical protein (AHRD V3.3 *** AT5G06380.1)
Solyc01g009260	0.054555	0.036546	0.0258977	0.012521	0.009368	0.0214737	0.0324257	0.0139743	protein FAF-like, chloroplastic (AHRD V3.3 *** A0A2I4H6U5_9ROSI)
Solyc01g009270	0	0.049196	0	0	0.036841	0.819557	0.314922	0.991182	protein FAF-like, chloroplastic (AHRD V3.3 *** A0A2I4H6U5_9ROSI)
Solyc01g009280	8.11572	6.90766	7.30636	8.04372	12.3431	11.8634	15.8281	17.7693	Serine/threonine-protein phosphatase (AHRD V3.3 *** A0A2G2XPM1_CAPBA)
Solyc01g009290	12.4636	13.2111	16.2748	15.9778	14.852	19.8383	23.285	22.3342	Protein CLP1 homolog (AHRD V3.3 *** A0A2G2XPN7_CAPBA)
Solyc01g009300	7.32463	5.80899	4.2545	5.83401	6.7539	4.64682	6.9754	8.70439	Serine/threonine-protein kinase Nek2 (AHRD V3.3 *** A0A2G2XPS8_CAPBA)
Solyc01g009305	0	0	0	0	0	0	0	0	Unknown protein
Solyc01g009310	58.2066	56.8975	61.1769	69.7566	30.4588	65.5976	71.6389	73.6439	meloidogyne-induced giant cell protein DB217
Solyc01g009320	0	0	0	0	0.05574	0.012124	0	0	RING-type E3 ubiquitin transferase (AHRD V3.3 *** A0A2G3DFC2_CAPCH)
Solyc01g009330	0	0	0.0858803	0	0.187761	0.030045	0.066487	0.015447	RING-type E3 ubiquitin transferase (AHRD V3.3 *** A0A1U8EN04_CAPAN)
Solyc01g009340	5.56229	6.12311	10.009	9.11946	1.85731	6.33198	16.5386	13.146	SUN-domain protein2
Solyc01g009350	0	0	0.703627	0	3.58	0.841471	0	0.031221	Polynucleotidyl transferase, ribonuclease H-like superfamily protein (AHRD V3.3 *** A0A2U1M9A7_ARTAN)
Solyc01g009360	0	0	0.136702	0.04531	0.442521	0.156196	0.0752387	0.0994527	Polynucleotidyl transferase, ribonuclease H-like superfamily protein (AHRD V3.3 *** A0A2U1M9A7_ARTAN)
Solyc01g009370	0	0	0	0	0.136858	0.019952	0	0.025968	Cytochrome P450 (AHRD V3.3 *** A0A2U1MC34_ARTAN)
Solyc01g009380	5.07259	6.01303	5.37671	6.32612	8.20348	8.58001	10.4357	9.67122	Nicalin (AHRD V3.3 *** A0A1Q3D0I4_CEPFO)
Solyc01g009390	6.10186	6.51842	7.37302	7.70702	12.0221	12.451	12.4839	12.9926	mRNA-decapping enzyme-like protein (AHRD V3.3 *** A0A2G2XQ62_CAPBA)
Solyc01g009400	0	0	0	0	0	0.0147463	0	0	Peroxidase (AHRD V3.3 *** K4ATD6_SOLLC)
Solyc01g009410	0.0109753	0.060781	0.18535	0.0825833	0.016266	0.0130447	0	0.0807967	Peroxidase (AHRD V3.3 *** K4ATD7_SOLLC)
Solyc01g009420	125.115	130.213	134.906	166.154	83.2911	129.647	102.615	116.219	UDP-apiose/UDP-xylose synthase (AHRD V3.3 *** A0A1B3TP38_SPIPO)
Solyc01g009430	62.6615	83.7827	19.1459	43.421	3.94315	12.0517	4.954	15.6585	hypothetical protein (AHRD V3.3 *** AT2G27830.1)
Solyc01g009440	0	0	0.195524	0.064378	2.84107	0.757936	0.778551	0.478755	Dehydration-responsive element-binding protein 1B (AHRD V3.3 *** A0A2G2XQ55_CAPBA)
Solyc01g009443	30.6728	29.2447	21.81	22.2645	32.7218	28.1935	30.3473	26.2999	Mitochondrial inner membrane protease ATP23 (AHRD V3.3 *** A0A2G3DGC1_CAPCH)
Solyc01g009447	83.398	73.5824	117.876	106.2	141.743	129.585	118.11	86.1946	60S acidic ribosomal protein family (AHRD V3.3 *-* F4IGR3_ARATH),Pfam:PF00428
Solyc01g009470	0	0	0	0	0.166119	0.303699	0	0	Poly [ADP-ribose] polymerase (AHRD V3.3 *** A0A2G2XQ99_CAPBA)
Solyc01g009480	0.111648	0.0309817	0.12152	0.093208	0.440914	0.152875	0	0.0439157	Alpha/beta-Hydrolases superfamily protein (AHRD V3.3 *** F4J341_ARATH)
Solyc01g009490	0	0	0.079596	0	0.820016	0.0349503	0	0	DUF4228 domain-containing protein (AHRD V3.3 *** A0A1Q3CT45_CEPFO)
Solyc01g009500	9.43216	8.51283	6.57151	8.72612	2.29111	4.30016	4.02202	4.44588	Alpha/beta-Hydrolases superfamily protein (AHRD V3.3 *** F4J341_ARATH)
Solyc01g009505	0	0	0	0	0	0	0	0	Unknown protein
Solyc01g009510	0	0	0	0	0	0	0	0	Abscisic acid responsive elements-binding factor 2 (AHRD V3.3 --* A0A1P8AV75_ARATH)
Solyc01g009520	140.688	131.092	154.575	150.94	115.821	131.861	119.54	98.329	Ribosomal protein (AHRD V3.3 *** Q6ER67_ORYSJ)
Solyc01g009530	0	0	0	0	0.0143193	0	0.017644	0	plant/protein (AHRD V3.3 *-* AT5G43400.1)
Solyc01g009540	0	0	0	0	0	0	0	0	Plant/T31B5-30 protein (AHRD V3.3 *-* A0A2K3PGR9_TRIPR)
Solyc01g009550	0	0	0	0	0	0	0	0	Protein TIC 214 (AHRD V3.3 *-* TI214_SOLTU)
Solyc01g009560	0	0	0	0	0	0	0.172405	0	Terminal flower 1 (AHRD V3.3 *** A0A2Z4I2Q4_CITLI)
Solyc01g009565	13.369	13.8812	9.15767	7.91568	3.56119	4.77907	5.11067	4.82418	receptor-like protein 12 (AHRD V3.3 *-* A0A1U8E178_CAPAN)
Solyc01g009580	0	0	0.0519017	0.0263817	0.264725	0.0454513	1.54643	0.953022	Terminal flower 1 (AHRD V3.3 *** A0A2Z4I2Q4_CITLI)
Solyc01g009590	0.574939	0.312594	3648.66	25.9437	16047.1	3155.11	12.7709	14.587	Stamen-specific protein FIL1 (AHRD V3.3 *** A0A2G3AJI0_CAPAN)
Solyc01g009600	0	0.00955367	0.018665	0	5.04953	0.604117	0	0	S-adenosyl-L-methionine-dependent methyltransferases superfamily protein (AHRD V3.3 *** A0A2U1NM08_ARTAN)
Solyc01g009610	31.8568	31.7975	24.097	30.1178	12.5691	24.0314	22.1716	21.5434	Protein phosphatase inhibitor 2-like (AHRD V3.3 *** A0A2K3NNM1_TRIPR)
Solyc01g009620	23.1648	25.4877	28.2885	28.602	21.4005	31.6776	29.7097	24.8873	Cleavage and polyadenylation specificity factor subunit 5 (AHRD V3.3 *** A0A2G2XQG1_CAPBA)
Solyc01g009630	30.2588	34.6258	36.608	37.2662	29.0113	38.3315	40.0024	35.4764	Cleavage and polyadenylation specificity factor subunit 5 (AHRD V3.3 *** A0A1U8G7I4_CAPAN)
Solyc01g009640	0	0	0	0	0	0	0	0	Pectin lyase-like superfamily protein (AHRD V3.3 *** A0A2U1KXQ2_ARTAN)
Solyc01g009650	0	0	0	0	0	0	0	0	MYB transcription factor (AHRD V3.3 *-* B4FNQ6_MAIZE)
Solyc01g009660	0	0	0	0	0	0	0	0	Low-temperature-induced 65 kDa protein (AHRD V3.3 *** A0A1J3DLF3_NOCCA)
Solyc01g009670	7.96188	8.52028	1.51508	2.14118	1.20267	1.71516	2.70467	2.52098	Poly(A) polymerase I (AHRD V3.3 *** A0A1J3JYV1_NOCCA)
Solyc01g009690	0.177256	0.268688	0	0	0.00305333	0	0	0.00761633	SC0A (AHRD V3.3 *** Q9ZS79_SOLLC)
Solyc01g009700	0.237056	0.229099	0.0293813	0.110513	0	0.0190823	0.05526	0.014079	NL0E (AHRD V3.3 *** Q9ZS81_SOLLC)
Solyc01g009705	0.329191	0.135726	0	0	0	0	0	0	Unknown protein
Solyc01g009710	0.252447	0.736049	0	0.148717	0	0	0	0	Unknown protein
Solyc01g009720	0.763373	0.738106	0.560339	0.754509	0.033027	1.05729	1.3845	1.26485	E3 ubiquitin protein ligase DRIP2 (AHRD V3.3 *-* A0A2I0WFP3_9ASPA)
Solyc01g009730	0	0	0	0	0	0	0	0	protein TIFY 9-like (AHRD V3.3 *-* A0A2I4HSS0_9ROSI)
Solyc01g009735	0	0	0	0	0	0	0	0	protein TIFY 9-like (AHRD V3.3 *** XP_025884767.1)
Solyc01g009740	0	0	0	0	0	0.043426	0.0632227	0.0327743	jasmonate-zim-domain protein 10 (AHRD V3.3 *-* AT5G13220.3)
Solyc01g009750	73.312	73.8471	127.855	156.526	65.2476	109.398	96.8399	89.7536	cysteine-rich and transmembrane domain-containing protein WIH2 (AHRD V3.3 *-* XP_004228441.1)
Solyc01g009760	3.34792	3.43885	2.83313	2.62345	1.50061	1.80756	3.56234	3.03462	GRAM domain family protein (AHRD V3.3 *** A0A2U1NIK8_ARTAN)
Solyc01g009770	6.57034	3.65666	25.3504	18.4194	15.1646	10.2875	10.611	6.90214	ATP-dependent RNA helicase (AHRD V3.3 *** Q5HZ54_ARATH)
Solyc01g009780	21.9957	22.3054	23.9122	27.6858	25.5588	23.7853	19.0318	18.7831	GSH-induced LITAF domain protein (AHRD V3.3 *** GILP_ARATH)
Solyc01g009790	0	0	0	0	0.01981	0	0	0.00449133	Unknown protein
Solyc01g009795	0	0	0	0	0	0	0	0	Unknown protein
Solyc01g009810	0.238428	0.20687	0.224421	0.32974	0	0.125153	0	0	Leucine-rich repeat protein (AHRD V3.3 *** A5HKK5_TOBAC)
Solyc01g009820	6.57522	6.87017	5.999	6.47806	9.8016	9.28307	11.3707	13.1244	Hydroxyproline-rich glycoprotein family protein (AHRD V3.3 *** A0A1P8AYF9_ARATH)
Solyc01g009830	0	0	0	0	0.0978103	0	0.0815203	0.103686	Nucleotide/sugar transporter family protein (AHRD V3.3 *** A0A2U1NJJ9_ARTAN)
Solyc01g009840	0	0	0	0	0	0	0	0	Transcription factor GRAS (AHRD V3.3 *-* A0A2U1QPG0_ARTAN)
Solyc01g009850	6.66428	7.53908	9.71155	10.1404	7.70038	11.5364	11.0656	8.43687	hypothetical protein (AHRD V3.3 *-* AT1G27435.1)
Solyc01g009860	32.7085	48.0966	5.6942	7.8499	18.9352	22.3331	10.9809	10.4134	NAC domain-containing protein (AHRD V3.3 *** A0A2K3LZ45_TRIPR)
Solyc01g009870	1.0494	0.357489	0.792277	1.64548	0.073904	2.57191	2.96676	3.06994	Glycerophosphodiester phosphodiesterase (AHRD V3.3 *** B6T3E4_MAIZE)
Solyc01g009880	0	0	0	0	0	0	0	0	Exocyst subunit Exo70 family protein (AHRD V3.3 *** A0A1S6GXB5_TOBAC)
Solyc01g009890	0.879433	0.295587	1.08018	0.994041	0.144939	0	0.0363397	0.17319	Glutaredoxin (AHRD V3.3 *** A0A2G9G4Q3_9LAMI)
Solyc01g009900	5.04193	8.08831	1.87971	6.41798	0.218148	0.129038	0.031014	0.020829	Glutaredoxin (AHRD V3.3 *** A0A1R3H2Z3_COCAP)
Solyc01g009910	0.373226	0.389656	0.543017	0.665828	0.0245157	0.084678	0	0	Glutaredoxin (AHRD V3.3 *** A0A1R3H2Z3_COCAP)
Solyc01g009920	0	0	0.070165	0	3.13536	0.33799	0	0	Histidine kinase-, DNA gyrase B-, and HSP90-like ATPase family protein (AHRD V3.3 *** A0A1P8BEQ3_ARATH)
Solyc01g009930	0.0604337	0.04364	0	0	0.0212617	0	0	0	receptor-like protein 12 (AHRD V3.3 *** A0A1U8F9L9_CAPAN)
Solyc01g009940	0	0	0	0	0	0	0	0	5-methylthioadenosine/S-adenosylhomocysteine deaminase (AHRD V3.3 *** A0A2V4VVN3_PAEBA)
Solyc01g009960	0.0283763	0.0119153	0	0	0	0	0	0	Acyl-[acyl-carrier-protein] desaturase (AHRD V3.3 *** A0A2I4GZ93_9ROSI)
Solyc01g009970	28.3102	31.6763	16.3819	20.1863	15.7912	19.8077	18.2966	18.0286	Hydrolase (AHRD V3.3 *** A0A2U1P3E1_ARTAN)
Solyc01g009975	0	0	0	0	0	0	0	0	Retrovirus-related Pol polyprotein from transposon TNT 1-94 (AHRD V3.3 *-* A0A2K3MQ97_TRIPR)
Solyc01g009980	0	0	0	0	0.024702	0	0	0	Retrovirus-related Pol polyprotein from transposon TNT 1-94 (AHRD V3.3 *-* A0A2I0VMT6_9ASPA),Pfam:PF14223
Solyc01g009990	342.246	386.304	179.869	178.937	147.446	203.453	179.296	162.685	Peptidyl-prolyl cis-trans isomerase (AHRD V3.3 *** A0A2G3DGA1_CAPCH)
Solyc01g010000	6.75674	5.83663	6.41731	5.42105	7.59398	6.96479	5.64698	4.97941	ACT domain-containing protein (AHRD V3.3 *** A0A1Q3BTU5_CEPFO)
Solyc01g010020	3.77753	3.06261	11.7026	15.5562	7.22366	3.80625	1.2158	1.3929	Calmodulin (AHRD V3.3 *** B6SJJ2_MAIZE)
Solyc01g010030	7.88444	6.65281	6.62173	7.45373	2.39629	6.55006	12.2567	12.5397	Proline-rich receptor-like protein kinase PERK13 (AHRD V3.3 *-* A0A2G3AJ74_CAPAN)
Solyc01g010050	35.7051	34.0418	39.0896	47.3227	36.4342	43.6585	53.9465	56.195	S-adenosylmethionine decarboxylase 3
Solyc01g010060	17.7221	17.7083	4.78434	12.455	4.28422	9.13723	5.55073	7.92106	Unknown protein
Solyc01g010063	0	0	0	0	0	0	0	0	Unknown protein
Solyc01g010065	0	0	0	0	0.661349	0.0109477	0	0	Serine/threonine-protein phosphatase 7 long form-like protein (AHRD V3.3 *-* A0A1J3IZ43_NOCCA)
Solyc01g010067	0	0	0	0	0	0	0	0	Ty3/gypsy retrotransposon protein (AHRD V3.3 *** A0A2K3N0D4_TRIPR)
Solyc01g010080	0.199442	0.254342	0.285906	0	5.76007	0.195961	0.0109873	0.0470743	Potassium channel AKT1 (AHRD V3.3 *** A0A2G3AJ60_CAPAN)
Solyc01g010130	17.053	17.4844	9.55659	13.6282	6.9487	8.44327	13.6905	16.4725	bHLH transcription factor 001
Solyc01g010140	0	0	0	0	0.00675767	0	0	0	18S pre-ribosomal assembly protein gar2-like protein (AHRD V3.3 *** AT2G03810.7)
Solyc01g010150	2.78778	2.48399	11.1834	9.3582	33.2595	24.3779	6.94136	7.27635	ACT domain-containing protein (AHRD V3.3 *** A0A2U1MM44_ARTAN)
Solyc01g010160	0	0	0	0	0	0	0	0	Beta-glucosidase 34 (AHRD V3.3 *-* A0A2G3DFM9_CAPCH)
Solyc01g010170	0	0	0	0	0	0	0	0	beta-glucosidase 40 (AHRD V3.3 --* XP_004228406.1)
Solyc01g010175	0	0	0	0	0	0	0	0	Retrovirus-related Pol polyprotein from transposon TNT 1-94 (AHRD V3.3 *-* A0A2K3NZR4_TRIPR)
Solyc01g010180	64.4493	83.7003	27.4559	37.0675	4.04591	23.1766	6.15094	8.90659	Unknown protein
Solyc01g010185	217.654	254.344	267.31	345.086	95.4074	167.364	118.318	126.858	Retrovirus-related Pol polyprotein from transposon TNT 1-94 (AHRD V3.3 *-* A0A2K3MSD0_TRIPR)
Solyc01g010210	0	0	0	0.00985	0	0	0	0	Unknown protein
Solyc01g010215	38.2074	41.4016	42.1295	47.2573	18.2961	41.5291	40.0908	37.633	UBN2 domain-containing protein (AHRD V3.3 *-* A0A1Q3DGW3_CEPFO)
Solyc01g010220	28.6178	21.2913	33.4659	25.0554	14.2888	15.5971	26.2991	17.6244	Copia-like polyprotein/retrotransposon (AHRD V3.3 --* Q9FI33_ARATH)
Solyc01g010230	77.1516	98.1701	61.9205	79.5555	26.1574	42.0402	47.5671	59.4785	MDIS1-interacting receptor like kinase 2 (AHRD V3.3 --* XP_024448779.1)
Solyc01g010240	0	0	4.0952	0	0.069231	6.78649	13.3067	8.66554	CRABS CLAW a
Solyc01g010250	12.9631	10.62	17.6182	13.7371	4.7583	44.2138	42.0146	35.1073	6-phosphogluconolactonase (AHRD V3.3 *** B6U0H2_MAIZE)
Solyc01g010260	0.008596	0	0	0	0.00740233	0	0	0	Cytochrome 93A3 (AHRD V3.3 *** A0A1U8H5Z8_CAPAN)
Solyc01g010270	53.6784	52.7499	32.3466	43.6768	47.4923	35.5422	23.3273	23.8243	Protein SPIRAL1 (AHRD V3.3 *** A0A2G3DFN1_CAPCH)
Solyc01g010280	0.076505	0.0520257	0.034776	0	0.340695	0.118156	0	0.0271567	suppressor SRP40-like protein (AHRD V3.3 *-* AT2G03630.1)
Solyc01g010290	7.95723	8.59011	6.08396	7.52189	8.64376	8.61381	7.59278	8.35125	Ureide permease (AHRD V3.3 *** A0A2R6PBP7_ACTCH)
Solyc01g010310	25.3729	20.5382	53.6608	38.7977	102.691	84.8866	59.1086	52.2268	Carbohydrate-binding X8 domain superfamily protein (AHRD V3.3 *** A0A1P8AZV6_ARATH)
Solyc01g010350	0.012609	0	0.306225	0.0255473	7.1929	0.62012	0	0	triose phosphate/phosphate translocator, chloroplastic-like (AHRD V3.3 *** A0A2I4H880_9ROSI)
Solyc01g010360	0	0	0	0	16.5938	0.928995	0	0	14-3-3 protein (AHRD V3.3 *** A0A200R871_9MAGN)
Solyc01g010365	0	0	0	0	0	0	0	0	Unknown protein
Solyc01g010370	4.19034	3.90619	5.41622	4.95016	8.43605	7.2464	8.76248	9.25472	S-adenosyl-L-methionine-dependent methyltransferases superfamily protein (AHRD V3.3 *** A0A2U1P6Q5_ARTAN)
Solyc01g010390	7.5307	9.02955	9.18218	9.52492	562.24	32.82	5.75901	5.85791	Beta-glucosidase 34 (AHRD V3.3 *** A0A2G3DFM9_CAPCH)
Solyc01g010400	0	0	0	0	0	0	0	0	RlpA-like double-psi beta-barrel domain-containing protein (AHRD V3.3 *** A0A2U1M803_ARTAN)
Solyc01g010405	0	0	0	0	0.0445953	0	0	0	Plant transposase (Ptta/En/Spm family) (AHRD V3.3 *-* F4I6H5_ARATH)
Solyc01g010410	0.06838	0.041973	0.0351333	0.0393033	2.54032	0.365956	0.161219	0.181097	Zinc finger protein (AHRD V3.3 *** A0A200PRD7_9MAGN)
Solyc01g010415	0	0	0	0	0.035869	0	0	0	Retrovirus-related Pol polyprotein from transposon TNT 1-94 (AHRD V3.3 *-* A0A2K3NZR4_TRIPR)
Solyc01g010420	0.006235	0.0444723	0.022036	0.122775	0.213234	0.0936767	0.0450493	0.052311	Actin cross-linking protein (DUF569) (AHRD V3.3 *** Q9XIF7_ARATH)
Solyc01g010430	2.37334	1.65255	5.12804	2.96547	21.8739	10.4958	4.7969	5.35517	Actin cross-linking protein, putative (DUF569) (AHRD V3.3 *** Q8GXC9_ARATH)
Solyc01g010440	27.5573	29.2092	33.44	36.5534	28.5085	50.62	52.1395	57.5054	Glycine-rich protein (AHRD V3.3 *** Q9LFX8_ARATH)
Solyc01g010460	5.2178	4.56913	2.23354	1.8305	2.00305	2.1968	3.91631	4.96354	5'-AMP-activated protein kinase subunit beta-2 (AHRD V3.3 *** A0A1J3EBW5_NOCCA)
Solyc01g010470	5.07074	3.66551	1.3408	1.11003	1.3254	1.70092	3.07003	3.04819	5'-AMP-activated protein kinase subunit beta-2 (AHRD V3.3 *-* A0A1J3HGR2_NOCCA)
Solyc01g010480	17.5104	35.1363	0.335661	1.7917	0.460552	2.26685	0.926475	2.09213	Protein TWIN LOV 1 (AHRD V3.3 *** A0A2G3AIG6_CAPAN)
Solyc01g010490	0	0	0.0332203	0	0.018528	0	0.0183657	0	Cytochrome P450 (AHRD V3.3 *** A0A2U1NH79_ARTAN)
Solyc01g010500	0.221009	0.0248047	0	0	27.2563	4.12245	0	0.014352	EIN3-binding F-box protein 1 (AHRD V3.3 *-* A0A2G2WKD4_CAPBA)
Solyc01g010510	1.0596	0.885262	1.03556	0.80787	1.56005	1.81615	2.53595	3.30155	Pentatricopeptide repeat-containing protein, mitochondrial (AHRD V3.3 *** A0A2G2X910_CAPBA)
Solyc01g010520	18.3118	19.6568	18.7754	20.3219	14.9424	27.7074	37.248	37.6345	Helicase with zinc finger protein (AHRD V3.3 *** B3H5Y3_ARATH)
Solyc01g010530	0	0	1.84424	0.237525	36.4018	2.17173	0.0162573	0	Sugar transporter protein 5
Solyc01g010540	123.766	128.077	165.033	135.495	138.18	187.26	172.296	136.368	40S ribosomal protein S9 (AHRD V3.3 *** A0A1U8EPE0_CAPAN)
Solyc01g010550	0	0	0	0	0	0	0	0	Unknown protein
Solyc01g010570	12.522	13.5686	20.4848	20.571	12.2378	19.2994	21.1307	22.4033	Mucin-related protein (AHRD V3.3 *** A0A2U1LU51_ARTAN)
Solyc01g010580	240.878	259.605	324.969	323.821	201.124	350.753	289.883	263.273	40S ribosomal protein S9 (AHRD V3.3 *** A0A1U8EPE0_CAPAN)
Solyc01g010590	23.3353	23.0879	36.34	38.0189	20.8621	57.0332	46.8066	46.2477	Peptidyl-prolyl cis-trans isomerase (AHRD V3.3 *** A0A1U8HBC6_CAPAN)
Solyc01g010600	0.34728	0.317568	3.96652	0.676358	0	8.09663	24.9792	19.6965	Homeobox-leucine zipper protein HOX21 (AHRD V3.3 *** A0A1U8ELC5_CAPAN)
Solyc01g010640	51.9398	48.6139	16.8215	20.5553	8.24916	13.4657	16.1547	13.7342	NAD(P)-linked oxidoreductase superfamily protein (AHRD V3.3 *** Q949S6_ARATH)
Solyc01g010650	22.7319	24.801	30.831	33.2394	45.72	50.782	38.1651	41.3626	UDP-galactose UDP-glucose transporter 3-like protein (AHRD V3.3 *** A0A2K3NS07_TRIPR)
Solyc01g010660	14.871	11.5992	15.7296	21.0646	4.47386	6.99432	10.5528	8.77066	Protein kinase 2B, chloroplastic (AHRD V3.3 *** A0A2G3AIH7_CAPAN)
Solyc01g010670	0	0	0	0	0	0	0	0	Unknown protein
Solyc01g010690	0	0.0356573	0	0	0.0440553	0	0.030888	0.00994267	Quinoprotein alcohol dehydrogenase-like superfamily (AHRD V3.3 *** A0A2U1NBT6_ARTAN)
Solyc01g010700	10.9073	12.3598	5.2097	6.85502	10.364	6.87165	4.88456	6.04315	SNF1-related protein kinase regulatory subunit gamma-1-like (AHRD V3.3 *** A0A2G3DFN0_CAPCH)
Solyc01g010705	0	0	0	0	0.060069	0	0	0	Retrovirus-related Pol polyprotein from transposon TNT 1-94 (AHRD V3.3 *-* A0A2K3NZR4_TRIPR)
Solyc01g010710	4.37908	3.79904	4.08689	7.93381	0.416733	0.92289	0.54037	0.572473	Carboxypeptidase (AHRD V3.3 *** A0A2I4FWA2_9ROSI)
Solyc01g010720	0	0	0	0	0.0216487	0.013351	0	0	Carboxypeptidase (AHRD V3.3 *** A0A2I4FWA2_9ROSI)
Solyc01g010740	0	0.018492	0	0	0.860159	0.0464557	0.018732	0	Pectate lyase (AHRD V3.3 *** A0A2G3DIQ3_CAPCH)
Solyc01g010750	126.21	139.472	172.895	186.675	144.957	186.338	152.325	153.92	Ricin B lectin domain (AHRD V3.3 *-* A0A200Q0G6_9MAGN)
Solyc01g010755	0.131457	0.019708	0.0426563	0	0	0.0234483	0.0958417	0.0680757	Serine/threonine-protein phosphatase 7 long form-like protein (AHRD V3.3 *-* A0A1J3IZ43_NOCCA)
Solyc01g010760	53.332	53.8945	68.7826	70.3638	114.762	91.7032	83.2926	68.0637	Mitochondrial outer membrane protein porin (AHRD V3.3 *** A0A2K3KY08_TRIPR)
Solyc01g010780	13.5459	14.9772	13.9535	13.8063	18.9803	23.1978	27.6454	30.3958	Protein kinase superfamily protein (AHRD V3.3 *** A0A2U1NYF7_ARTAN)
Solyc01g010785	0	0	0	0	0	0	0	0	Retrovirus-related Pol polyprotein from transposon TNT 1-94 (AHRD V3.3 *-* A0A2I0VDL0_9ASPA)
Solyc01g010810	10.6743	11.1886	11.8155	13.2804	10.4507	13.6599	14.024	13.2066	Ran-interacting Mog1 protein (AHRD V3.3 *** A0A200QSC1_9MAGN)
Solyc01g010820	14.3031	16.4357	18.2608	16.7423	18.1722	21.051	24.1792	26.9501	Cullin (AHRD V3.3 *** A0A2U1PKA1_ARTAN)
Solyc01g010830	16.5605	14.9209	17.7698	16.832	19.2309	17.5684	17.4909	14.2605	Haloacid dehalogenase-like hydrolase-like protein (AHRD V3.3 *** Q6Z026_ORYSJ),Pfam:PF13419
Solyc01g010840	0	0	0	0	0.0422597	0	0	0	Unknown protein
Solyc01g010860	8.28042	9.07932	7.05805	9.53289	7.47243	7.7315	8.27029	8.30992	Sphinganine C(4)-monooxygenase 1 (AHRD V3.3 *** A0A2G3DFM4_CAPCH)
Solyc01g010870	13.3312	13.6484	16.1553	16.2209	25.781	26.1918	22.0008	22.1772	S-adenosyl-L-methionine-dependent methyltransferases superfamily protein (AHRD V3.3 *** A0A2U1LK68_ARTAN)
Solyc01g010880	6.60185	5.89086	6.66252	6.72222	4.38046	6.63498	9.33316	8.55321	RING/FYVE/PHD zinc finger superfamily protein (AHRD V3.3 *** A0A2U1NXA0_ARTAN)
Solyc01g010890	0.0694293	0.0374187	0.0350583	0.0194797	0.0361473	0.014535	0	0	Expansin (AHRD V3.3 *** K4ATT2_SOLLC)
Solyc01g010900	0	0	389.747	0.925289	627.697	87.2529	0.675433	0.432982	Cytochrome P450 (AHRD V3.3 *** A0A200QEP7_9MAGN)
Solyc01g010910	1.08807	0.79944	2.38219	2.38673	0.282394	0.220203	0	0.0759817	MYB transcription factor (AHRD V3.3 *-* A0A0U3IU11_MESCR)
Solyc01g010920	3.02935	2.83109	2.52478	2.20568	4.23807	3.07864	4.41684	4.01986	O-fucosyltransferase (AHRD V3.3 *-* A0A2P5G0B7_TREOI)
Solyc01g010930	1.91592	1.39342	1.81293	1.90494	3.41488	2.40937	3.18931	4.02658	O-fucosyltransferase family protein (AHRD V3.3 *** A0A2U1NIF6_ARTAN)
Solyc01g010940	30.9351	29.8992	40.7758	47.2525	38.5514	42.4248	35.3323	33.2962	Transmembrane emp24 domain-containing protein p24delta7 (AHRD V3.3 *** A0A2G3AIH0_CAPAN)
Solyc01g010950	8.59141	7.73982	10.0458	9.79947	19.0934	12.4985	13.1542	14.4236	MAP kinase kinase kinase 2
Solyc01g010960	0	0	0	0	0	0	0	0	60S ribosomal protein L35-like (AHRD V3.3 *-* A0A2I4GBA7_9ROSI)
Solyc01g010970	0.546632	0.838157	1.89945	1.32114	1.14945	2.02613	6.19306	6.76622	Argonaute7
Solyc01g010990	5.59756	6.18769	5.58497	6.78879	9.05637	6.59946	8.09742	9.4181	Son of sevenless protein (AHRD V3.3 *** Q9LQY7_ARATH)
Solyc01g011000	212.279	230.444	255.647	247.444	222.956	267.535	210.293	182.841	Eukaryotic translation initiation factor 5A (AHRD V3.3 *** A0A1U8HES8_CAPAN)
Solyc01g011005	0	0	0.036158	0.0346033	0.111737	0.043774	0.058794	0	Retrovirus-related Pol polyprotein from transposon TNT 1-94 (AHRD V3.3 *-* A0A2I0VJ33_9ASPA)
Solyc01g011020	0	0	0	0	0	0	0	0	Unknown protein
Solyc01g011030	10.4752	11.0484	12.2173	13.1086	13.1492	14.087	13.718	14.3432	RING/U-box superfamily protein (AHRD V3.3 *** A0A2K3MXG0_TRIPR)
Solyc01g011040	38.9335	38.4339	50.5784	55.3361	60.3808	62.2207	58.6732	61.9297	Leucine-rich repeat receptor-like protein kinase (AHRD V3.3 *** A0A2R6RFK8_ACTCH)
Solyc01g011050	0.721038	0.4715	1.59192	0.318481	9.72749	0.326302	0.0127453	0.105616	leucine rich repeat protein
Solyc01g011060	0	0	0	0	0	0	0	0	Maturase (AHRD V3.3 *-* O79414_SOLTU)
Solyc01g011070	0	0	0	0	0	0	0	0	Unknown protein
Solyc01g011080	1.88755	1.6401	1.98598	1.47995	5.24132	4.12915	7.33755	7.74665	Unknown protein
Solyc01g011090	2.95931	2.39693	4.45819	6.21309	5.25581	5.41168	8.4217	12.657	Phospholipid-transporting ATPase (AHRD V3.3 *-* A0A1U8GCQ9_CAPAN)
Solyc01g011100	12.0338	12.0703	11.355	12.6231	13.6575	16.974	21.6614	26.114	Phospholipid-transporting ATPase (AHRD V3.3 *** A0A1U8GCQ9_CAPAN)
Solyc01g011105	4.08347	5.64087	5.14244	7.18681	0.382017	2.42906	4.54806	4.39131	CLAVATA3/ESR (CLE)-related protein 25-like (AHRD V3.3 *-* A0A2I4EI69_9ROSI)
Solyc01g011110	0	0	0	0	0	0	0	0	Unknown protein
Solyc01g011113	0	0	0	0	0	0	0	0	Retrovirus-related Pol polyprotein from transposon TNT 1-94 (AHRD V3.3 *-* A0A2I0VJ33_9ASPA)
Solyc01g011115	0	0	0	0	0	0	0	0	aspartic proteinase-like protein 2 (AHRD V3.3 *-* A0A1S4D538_TOBAC)
Solyc01g011117	0	0	0	0	0	0	0	0	protein TIFY 9-like (AHRD V3.3 --* XP_025884767.1)
Solyc01g011170	0	0	0	0	0	0	0	0	Unknown protein
Solyc01g011180	0	0	0	0	0	0	0	0	Sec1 family domain-containing protein MIP3 (AHRD V3.3 *-* A0A2G2VRM5_CAPBA)
Solyc01g011190	0	0	0	0	0	0	0	0	Sec1 family domain-containing protein MIP3 (AHRD V3.3 *-* A0A2G3BC24_CAPCH)
Solyc01g011200	0.805781	0.625144	0.226326	0.666157	0.506571	0.62161	1.06577	1.05566	aspartic proteinase-like protein 2 (AHRD V3.3 *-* A0A1S4D538_TOBAC)
Solyc01g011220	0.721101	0.38261	0.436992	0.40223	0.439648	0.800684	0.8639	0.717939	Aspartic proteinase-like protein 2 (AHRD V3.3 *-* A0A1J6IK01_NICAT)
Solyc01g011230	0.195107	0.22985	0.267839	0.214624	0.133218	0.282689	0.524366	0.656674	Eukaryotic aspartyl protease family protein (AHRD V3.3 *-* Q0WQ50_ARATH)
Solyc01g011260	0	0	0	0	0	0	0	0	Aspartic proteinase-like protein 2 (AHRD V3.3 *-* A0A1J6IK01_NICAT)
Solyc01g011270	0	0	0	0	0	0	0	0	Aspartic proteinase-like protein 2 (AHRD V3.3 *-* A0A1J6IK01_NICAT)
Solyc01g011273	0.0283317	0	0	0	0	0	0	0	Unknown protein
Solyc01g011277	0.0227583	0.125994	0.0110797	0.0387733	0.0346217	0.0336277	0.101824	0.050168	High mobility group B protein 10 (AHRD V3.3 *-* A0A2G2X5K3_CAPBA)
Solyc01g011300	0	0	0	0	0	0	0	0	Aspartic proteinase-like protein 2 (AHRD V3.3 *-* A0A1J6IK01_NICAT)
Solyc01g011310	0	0	0	0	0	0	0	0	aspartic proteinase-like protein 2 (AHRD V3.3 *-* A0A1S4C1I7_TOBAC)
Solyc01g011320	0	0	0	0	0	0	0	0	aspartic proteinase-like protein 2 (AHRD V3.3 *-* A0A1S4D538_TOBAC)
Solyc01g011330	0	0	0	0	0	0	0	0	Aspartic proteinase-like protein 2 (AHRD V3.3 *-* A0A1J6IK01_NICAT)
Solyc01g011340	28.5819	28.6997	33.8773	36.0808	37.9042	43.331	40.5014	40.1264	protein phosphatase 2A catalytic subunit 2
Solyc01g011350	11.9844	10.7283	17.0109	16.5617	21.9249	24.8434	29.9027	29.1617	DUF3755 domain-containing protein (AHRD V3.3 *** A0A1Q3D9X4_CEPFO)
Solyc01g011352	0	0	0	0.078062	0.0803747	0.037421	0.0914847	0.034279	Retrovirus-related Pol polyprotein from transposon TNT 1-94 (AHRD V3.3 *-* A0A2I0WBP1_9ASPA)
Solyc01g011354	0	0	0	0	0.0293447	0	0.0811703	0	Retrovirus-related Pol polyprotein from transposon TNT 1-94 (AHRD V3.3 *-* A0A2I0WDP9_9ASPA)
Solyc01g011356	0	0	0	0	0.877535	0.0189173	0	0.0666363	Retrovirus-related Pol polyprotein from transposon TNT 1-94 (AHRD V3.3 *-* A0A2G2W4T7_CAPBA)
Solyc01g011358	0	0	0.0184487	0	0.052659	0.0534817	0	0.08952	Retrovirus-related Pol polyprotein from transposon TNT 1-94 (AHRD V3.3 *-* A0A2I0WP97_9ASPA)
Solyc01g011390	0	0	0.0433463	0.022173	0	0.013059	0	0	basic-leucine zipper transcription factor A (AHRD V3.3 *-* XP_021809091.1)
Solyc01g011410	0	0	0	0	0	0	0	0	NAD(P)H-quinone oxidoreductase subunit H, chloroplastic (AHRD V3.3 *-* A0A1U8QCJ3_CAPAN)
Solyc01g011413	0.017116	0.023739	0	0.019569	0.16454	0.058872	0.105348	0.039799	Unknown protein
Solyc01g011417	0	0	0	0	0	0	0	0	Photosystem II CP47 reaction center protein (AHRD V3.3 *-* A0A140JZJ0_GYMST)
Solyc01g011430	0.074534	0.056152	0.769928	0.46517	0.605848	1.28931	2.06075	1.61017	O-acyltransferase WSD1-like (AHRD V3.3 *** A0A2I4EG31_9ROSI)
Solyc01g011435	0	0	0.0887633	0.0917277	0	0	0.0444367	0	Defensin-like protein 1 (AHRD V3.3 *** A0A1U8FEJ7_CAPAN),Pfam:PF00304
Solyc01g011460	0.163244	0	0.041458	0	0.0715177	0	0.0401207	0.026482	Unknown protein
Solyc01g011465	0.341626	0.0322407	0.210544	0	0.0311	0	0	0	Unknown protein
Solyc01g011470	0	0	0	0	0	0	0	0	Kirola (AHRD V3.3 *-* A0A2U1MSV5_ARTAN)
Solyc01g011480	0	0	0	0	0	0	0	0	Photosystem II CP43 reaction center protein (AHRD V3.3 *-* A0A2G2VUH1_CAPBA)
Solyc01g011490	0	0	0.0257707	0.045109	0	0	0	0	O-acyltransferase WSD1-like (AHRD V3.3 *-* A0A2I4EG31_9ROSI)
Solyc01g011495	0	0	0	0	0.0196663	0.068075	0.040577	0.0295337	Defensin-like protein 1 (AHRD V3.3 *** A0A1U8FEJ7_CAPAN),Pfam:PF00304
Solyc01g011500	0	0	0	0	0	0	0	0	Unknown protein
Solyc01g011510	23.1473	23.106	44.1795	62.0321	29.71	7.02834	4.14108	4.22323	Aldehyde dehydrogenase (AHRD V3.3 *** A0A200Q0A3_9MAGN)
Solyc01g011520	0	0	0	0	0	0	0	0	Endoribonuclease Dicer-like protein 2 (AHRD V3.3 *-* A0A2G2Y661_CAPAN)
Solyc01g011530	0	0	0	0	0	0	0	0	Endoribonuclease Dicer-like protein 2 (AHRD V3.3 *-* A0A2G2Y661_CAPAN)
Solyc01g011540	0	0	0	0	0	0	0	0	Endoribonuclease Dicer-like protein 2 (AHRD V3.3 *-* A0A2G2Y661_CAPAN)
Solyc01g012540	0	0	0	0	0	0	0	0	Endoribonuclease Dicer-like protein 2 (AHRD V3.3 *-* A0A2G2Y661_CAPAN)
Solyc01g012550	0	0	0	0	0	0	0	0	Endoribonuclease Dicer-like protein 2 (AHRD V3.3 *-* A0A2G3B0Q1_CAPCH)
Solyc01g012560	0	0	0	0	0	0	0	0	Endoribonuclease Dicer-like protein 2 (AHRD V3.3 *-* A0A2G3B0Q1_CAPCH)
Solyc01g012570	0	0	0	0	0	0	0	0	Endoribonuclease Dicer-like protein 2 (AHRD V3.3 *-* A0A2G2Y661_CAPAN)
Solyc01g012580	0	0	0	0	0	0	0	0	Endoribonuclease Dicer-like protein 2 (AHRD V3.3 *-* A0A2G2Y661_CAPAN)
Solyc01g012585	0	0	0	0	0	0	0	0	Retrovirus-related Pol polyprotein from transposon TNT 1-94 (AHRD V3.3 *-* A0A2I0VHP9_9ASPA)
Solyc01g012590	0	0	0	0	0	0	0	0	Endoribonuclease Dicer-like protein 2 (AHRD V3.3 *-* A0A2G3B0R0_CAPCH)
Solyc01g012610	0	0	0	0	0	0	0	0	Endoribonuclease Dicer-like protein 2 (AHRD V3.3 *-* A0A2G2VE65_CAPBA)
Solyc01g012650	0	0	0	0	0	0	0	0	Endoribonuclease Dicer-like protein 2 (AHRD V3.3 *-* A0A2G2Y661_CAPAN)
Solyc01g012670	0	0	0	0	0	0	0	0	Endoribonuclease Dicer-like protein 2 (AHRD V3.3 *-* A0A2G2Y661_CAPAN)
Solyc01g012680	0	0	0	0	0	0	0	0	Endoribonuclease Dicer-like protein 2 (AHRD V3.3 *-* A0A2G3B0Q1_CAPCH)
Solyc01g012690	0	0	0	0	0	0	0	0	receptor-like protein 12 (AHRD V3.3 *-* A0A1U8DTH8_CAPAN)
Solyc01g012700	0	0	0	0.0225907	0	0	0	0	Aldehyde dehydrogenase (AHRD V3.3 *** A0A200Q0A3_9MAGN)
Solyc01g012720	0	0	0	0	0	0	0	0	Endoribonuclease Dicer-like protein 2 (AHRD V3.3 *-* A0A2G2VE75_CAPBA)
Solyc01g012730	0	0	0	0	0	0	0	0	Endoribonuclease Dicer-like protein 2 (AHRD V3.3 *-* A0A2G3B0R0_CAPCH)
Solyc01g012740	0	0	0	0	0	0	0	0	Endoribonuclease Dicer-like protein 2 (AHRD V3.3 *-* A0A2G2Y661_CAPAN)
Solyc01g012750	0	0	0	0	0	0	0	0	Aldehyde dehydrogenase (AHRD V3.3 *-* A0A1Q3AVW5_CEPFO)
Solyc01g012760	0	0	0	0.0158083	0	0	0	0	Aldehyde dehydrogenase (AHRD V3.3 *-* A0A200Q0A3_9MAGN)
Solyc01g013760	0	0	0	0	0	0	0	0	Endoribonuclease Dicer-like protein 2 (AHRD V3.3 *-* A0A2G2Y661_CAPAN)
Solyc01g013780	0	0	0	0	0	0	0	0	Endoribonuclease Dicer-like protein 2 (AHRD V3.3 *-* A0A2G2Y661_CAPAN)
Solyc01g013790	0	0	0	0	0	0	0	0	Endoribonuclease Dicer-like protein 2 (AHRD V3.3 *-* A0A2G3B0Q1_CAPCH)
Solyc01g013810	0	0	0	0	0	0	0	0	Endoribonuclease Dicer-like protein 2 (AHRD V3.3 *-* A0A2G3B0Q1_CAPCH)
Solyc01g013820	0	0	0	0	0	0	0	0	endoribonuclease Dicer homolog 2 (AHRD V3.3 --* XP_006428678.1)
Solyc01g013840	0	0	0	0	0	0	0	0	Endoribonuclease Dicer-like protein 2 (AHRD V3.3 *-* A0A2G2Y661_CAPAN)
Solyc01g013850	0	0	0	0	0	0	0	0	Endoribonuclease Dicer-like protein 2 (AHRD V3.3 *-* A0A2G3B0R0_CAPCH)
Solyc01g013860	0	0	0	0	0	0	0	0	Endoribonuclease Dicer-like protein 2 (AHRD V3.3 *-* A0A2G2VE65_CAPBA)
Solyc01g013870	0	0	0	0	0	0	0	0	receptor-like protein 12 (AHRD V3.3 *-* A0A1U7XMD6_NICSY)
Solyc01g013880	0	0	0	0	0	0	0	0	receptor-like protein 12 (AHRD V3.3 *-* A0A1U8DTH8_CAPAN)
Solyc01g013883	0.0217733	0	0	0	0	0	0.0268573	0.0327753	Aldehyde dehydrogenase (AHRD V3.3 *-* A0A218WKY9_PUNGR)
Solyc01g013887	0	0	0	0	0	0	0	0	Unknown protein
Solyc01g013890	0	0.0236017	0.0234107	0.013461	0	0	0	0	Aldehyde dehydrogenase (AHRD V3.3 *** A0A200Q0A3_9MAGN)
Solyc01g013910	0	0	0	0	0	0	0	0	Endoribonuclease Dicer 2b (AHRD V3.3 *-* A0A164W6J8_SOLLC)
Solyc01g013920	0	0	0	0	0	0	0	0	Endoribonuclease Dicer-like protein 2 (AHRD V3.3 *-* A0A2G2Y661_CAPAN)
Solyc01g013930	0	0	0	0	0	0	0	0	Endoribonuclease Dicer-like protein 2 (AHRD V3.3 *-* A0A2G3B0Q1_CAPCH)
Solyc01g013950	0	0	0	0	0	0	0	0	Endoribonuclease Dicer-like protein 2 (AHRD V3.3 *-* A0A2G2Y661_CAPAN)
Solyc01g013970	0	0	0	0	0.0669703	0	0	0	Plastid transcriptionally active 3 (AHRD V3.3 *-* F4J3M2_ARATH)
Solyc01g013975	0	0	0	0	0	0	0	0	Unknown protein
Solyc01g013980	0	0	0	0	0	0	0	0	Vacuolar protein-sorting-associated protein 33-like protein (AHRD V3.3 *-* A0A2G3CIT9_CAPCH)
Solyc01g013985	0	0	0	0	0	0	0	0	Unknown protein
Solyc01g013990	0	0	0	0	0	0	0	0	Unknown protein
Solyc01g013995	0	0	0	0	0	0	0	0	B3 domain-containing transcription factor VRN1-like isoform X1 (AHRD V3.3 --* A0A2I4FEY9_9ROSI)
Solyc01g014000	0	0	0	0	0	0	0	0	Plastid transcriptionally active 3 (AHRD V3.3 *-* F4J3M2_ARATH)
Solyc01g014010	0	0	0	0	0	0	0	0	Unknown protein
Solyc01g014020	0	0	0	0	0	0	0	0	Hcr9-OR2C (AHRD V3.3 *-* Q4VSU3_SOLPI)
Solyc01g014050	0	0	0	0	0	0	0	0	asparagine-rich protein-like (AHRD V3.3 *-* XP_020397117.1)
Solyc01g014055	0	0	0	0	0	0	0	0	Reverse transcriptase (AHRD V3.3 *-* Q8W452_BRANA)
Solyc01g014060	0	0	0.049198	0	0.157286	0.469077	0.665165	0.579223	Plastocyanin-like (AHRD V3.3 *-* A0A200Q508_9MAGN)
Solyc01g014070	0	0.033195	0	0	0	0.0288183	0.0445523	0.0493117	Cupredoxin (AHRD V3.3 *-* A0A2U1PP75_ARTAN)
Solyc01g014090	0	0	0	0	0	0	0	0	Synaptotagmin-4 (AHRD V3.3 *-* A0A2G2X4F1_CAPBA)
Solyc01g014100	3.31416	4.31216	6.53404	1.91757	0.850212	28.3399	41.7531	40.696	CLE protein 1
Solyc01g014105	7.14618	5.44465	9.75618	10.3424	4.42509	3.1646	5.55106	5.70078	IRK-interacting protein (AHRD V3.3 *** A0A2I4FH54_9ROSI)
Solyc01g014130	0	0.0583797	0.102647	0.250432	0	0.030106	0	0	receptor-like protein 12 (AHRD V3.3 *-* A0A1U8DTH8_CAPAN)
Solyc01g014140	3.15836	5.81417	2.24985	5.94615	0.02759	0	0	0	receptor-like protein 12 (AHRD V3.3 *-* A0A2G2YW48_CAPAN)
Solyc01g014150	0	0.0407793	0	0	0	0	0	0	NL0E (AHRD V3.3 *-* Q9ZS81_SOLLC)
Solyc01g014160	0	0	0	0	0	0	0	0	receptor-like protein 12 (AHRD V3.3 *-* A0A1U8DTH8_CAPAN)
Solyc01g014170	0	0	0	0	0	0	0	0	receptor-like protein 12 (AHRD V3.3 *-* A0A1U7XMD6_NICSY)
Solyc01g014180	140.378	188.442	203.687	254.836	157.901	239.571	203.923	222.844	Zinc finger A20 and AN1 domain-containing stress-associated protein 8 (AHRD V3.3 *** A0A2G2UWG6_CAPBA)
Solyc01g014210	0	0	0	0	0	0	0	0	ADP,ATP carrier protein, mitochondrial (AHRD V3.3 *** A0A2G3CB84_CAPCH)
Solyc01g014220	0	0	0	0	0	0	0	0	DUF616 domain-containing protein (AHRD V3.3 *-* A0A1Q3BIE2_CEPFO)
Solyc01g014230	5.40948	5.86699	5.98315	6.24359	6.61233	7.20525	8.68983	8.76381	RING-type E3 ubiquitin transferase (AHRD V3.3 *** A0A2G3CB55_CAPCH)
Solyc01g014240	0	0	0	0	0	0	0	0	TMV resistance protein N (AHRD V3.3 *-* A0A2G2VDZ1_CAPBA)
Solyc01g014250	3.53651	5.26426	2.51739	1.99409	24.8409	5.63973	9.89183	10.4546	Unknown protein
Solyc01g014260	0	0	0	0	0	0	0	0	Unknown protein
Solyc01g014270	17.1005	23.3771	11.5617	13.7189	5.924	10.1042	8.95979	8.59746	Unknown protein
Solyc01g014275	2.52438	2.84493	0.0714603	0.398285	0.146177	0.0526397	0.0121653	0.064275	glycine-rich cell wall structural protein-like (AHRD V3.3 *-* XP_019067541.1)
Solyc01g014300	0	0	0	0	0	0	0	0	receptor-like protein 12 (AHRD V3.3 *-* A0A2G2YW48_CAPAN)
Solyc01g014310	0	0	0	0	0	0	0	0	receptor-like protein 12 (AHRD V3.3 *-* A0A1U8DTH8_CAPAN)
Solyc01g014315	0	0	0	0	0	0	0	0	Unknown protein
Solyc01g014320	1.01727	0.677168	0.0239543	0	2.21855	0.447547	0	0.0238117	S-adenosyl-L-methionine-dependent methyltransferases superfamily protein (AHRD V3.3 *** A0A2U1QHF5_ARTAN)
Solyc01g014350	0	0	0	0	0	0	0	0	Protein kinase family protein (AHRD V3.3 *-* F4ISN5_ARATH)
Solyc01g014355	0	0	0	0	0	0	0	0	Unknown protein
Solyc01g014360	0	0	0	0	0	0	0	0	4-hydroxy-4-methyl-2-oxoglutarate aldolase (AHRD V3.3 --* A0A2G3CF74_CAPCH)
Solyc01g014363	0	0	0	0	0	0	0.0207377	0	Retrovirus-related Pol polyprotein from transposon TNT 1-94 (AHRD V3.3 *-* POLX_TOBAC)
Solyc01g014367	0	0	0	0	0	0	0	0	Unknown protein
Solyc01g014370	0	0	0	0	0	0	0	0	Synaptotagmin-4 (AHRD V3.3 *-* A0A2G2YVG9_CAPAN)
Solyc01g014373	4.13602	2.90761	2.52989	2.44812	2.57871	1.14215	2.3489	2.27667	IRK-interacting protein (AHRD V3.3 *** A0A2I4FH54_9ROSI)
Solyc01g014377	0	0	0	0	0	0	0	0	Unknown protein
Solyc01g014390	0	0	0	0	0	0	0	0	Unknown protein
Solyc01g014400	0	0	0	0	0	0	0	0	Endoribonuclease Dicer-like protein 2 (AHRD V3.3 *-* A0A2G2Y661_CAPAN)
Solyc01g014410	0	0	0	0	0	0	0	0	Dicer-like protein 2 (AHRD V3.3 *-* F8SXT7_NICAT)
Solyc01g014420	0	0	0	0	0	0	0	0	Endoribonuclease Dicer-like protein 2 (AHRD V3.3 *-* A0A2G2Y661_CAPAN)
Solyc01g014430	0	0	0	0	0	0	0	0	Endoribonuclease Dicer-like protein 2 (AHRD V3.3 *-* A0A2G2Y661_CAPAN)
Solyc01g014440	0	0	0	0	0	0	0	0	Endoribonuclease Dicer-like protein 2 (AHRD V3.3 *-* A0A2G2Y661_CAPAN)
Solyc01g014450	0	0	0	0	0	0	0	0	Dicer-like 2 protein (AHRD V3.3 *-* H9N4C7_NICAT)
Solyc01g014470	0.874053	0.626364	0.989542	0.91007	0.100488	0.456907	1.49251	1.67217	Unknown protein
Solyc01g014480	5.18433	4.99649	5.77837	5.92214	9.08127	7.58199	8.76392	10.2554	ETHYLENE INSENSITIVE 3-like 3 protein (AHRD V3.3 *** A0A2G3AJ97_CAPAN)
Solyc01g014490	9.38494	8.46723	8.53358	9.21671	9.77924	12.5246	17.1687	16.765	DNA topoisomerase 6 subunit B (AHRD V3.3 *** A0A2I4GDF3_9ROSI)
Solyc01g014510	0	0	0	0	0	0	0	0	G-type lectin S-receptor-like serine/threonine-protein kinase (AHRD V3.3 *-* A0A2K3NIX6_TRIPR)
Solyc01g014520	0	0	0	0	0	0	0	0	Receptor-like protein kinase (AHRD V3.3 *** A0A2U1PPA0_ARTAN)
Solyc01g014530	0	0	0	0	0	0	0	0	G-type lectin S-receptor-like serine/threonine-protein kinase (AHRD V3.3 *-* A0A2K3PIJ6_TRIPR)
Solyc01g014533	0	0	0	0	0	0	0	0	Retrovirus-related Pol polyprotein from transposon TNT 1-94 (AHRD V3.3 *-* A0A2I0WSF9_9ASPA)
Solyc01g014540	0	0	0	0	0	0	0	0	G-type lectin S-receptor-like serine/threonine-protein kinase (AHRD V3.3 --* A0A2K3NTH2_TRIPR)
Solyc01g014550	0	0	0	0	0	0	0	0	Receptor-like protein kinase (AHRD V3.3 *** A0A2U1PPA0_ARTAN)
Solyc01g014560	0	0	0	0	0	0	0	0	G-type lectin S-receptor-like serine/threonine-protein kinase (AHRD V3.3 *** A0A2K3PIJ6_TRIPR)
Solyc01g014620	1.0309	0.463707	0.67596	0.499321	1.34994	2.11226	1.87737	2.3542	Unknown protein
Solyc01g014640	0	0	0	0	0	0	0	0	G-type lectin S-receptor-like serine/threonine-protein kinase (AHRD V3.3 *-* A0A2K3NIX6_TRIPR)
Solyc01g014650	0	0	0	0	0	0	0	0	Receptor-like protein kinase (AHRD V3.3 *-* A0A2U1PPA0_ARTAN)
Solyc01g014660	0	0	0	0	0	0	0	0	G-type lectin S-receptor-like serine/threonine-protein kinase (AHRD V3.3 *** A0A2K3PIJ6_TRIPR)
Solyc01g014680	0	0	0	0	0	0	0	0	G-type lectin S-receptor-like serine/threonine-protein kinase (AHRD V3.3 *-* A0A2K3PIJ6_TRIPR)
Solyc01g014690	0	0	0	0	0	0	0	0	Receptor-like protein kinase (AHRD V3.3 *-* A0A2U1PPA0_ARTAN)
Solyc01g014700	0	0	0	0	0	0	0	0	G-type lectin S-receptor-like serine/threonine-protein kinase (AHRD V3.3 *-* A0A2K3PJV0_TRIPR)
Solyc01g014710	0	0	0	0	0	0	0	0	DUF1677 family protein (DUF1677) (AHRD V3.3 *** AT1G72510.2)
Solyc01g014720	0	0	0	0	0	0	0	0	Solanum lycopersicum Cytokinin Response Factor 7
Solyc01g014725	0	0	0	0	0	0	0	0	Leucine-rich repeat protein kinase family protein, putative (AHRD V3.3 *-* A0A061F7S3_THECC)
Solyc01g014730	0	0	0.032044	0	0	0	0	0.0159477	Unknown protein
Solyc01g014740	0.0227687	0	0	0	0	0	0	0.053607	Unknown protein
Solyc01g014745	0.159894	0.18185	0.0425083	0	0.0693207	0	0	0	Unknown protein
Solyc01g014760	0	0	0	0	0	0	0	0	Unknown protein
Solyc01g014800	0	0	0	0	0	0	0	0	Endoribonuclease Dicer-like protein 2 (AHRD V3.3 *-* A0A2G2Y661_CAPAN)
Solyc01g014820	0	0	0	0	0	0	0	0.0192863	Inosine-uridine preferring nucleoside hydrolase family protein (AHRD V3.3 *-* A0A2U1LEG5_ARTAN)
Solyc01g014830	0	0	0	0	0	0	0	0	Extensin-like protein Dif10 (AHRD V3.3 *** Q43504_SOLLC)
Solyc01g014840	0.48927	0.561324	0.149148	0.214102	0.081616	0.173483	0.547826	0.794794	Disease resistance protein (TIR-NBS-LRR class) (AHRD V3.3 *** A0A2U1PW75_ARTAN)
Solyc01g014850	27.2888	29.2203	36.479	29.2709	26.7416	42.9922	43.0165	38.2156	Zinc finger transcription factor 7
Solyc01g014860	7.14892	7.07886	8.89828	10.4636	8.19357	12.8477	14.0528	15.8309	Unknown protein
Solyc01g014910	0	0	0	0	0	0	0	0	transcription factor bHLH95-like (AHRD V3.3 *** A0A2I4FIQ6_9ROSI)
Solyc01g014930	0	0	0	0	0	0	0	0	Hcr9-OR2C (AHRD V3.3 *-* Q4VSU3_SOLPI)
Solyc01g014940	0	0	0	0	0	0	0	0	Hcr9-OR2A (AHRD V3.3 *-* Q4VSU5_SOLPI)
Solyc01g014960	0	0	0	0	0.0428563	0	0	0	transcription factor bHLH95-like (AHRD V3.3 *** A0A2I4EEI6_9ROSI)
Solyc01g014963	0	0	0	0	0	0	0	0	Retrovirus-related Pol polyprotein from transposon TNT 1-94 (AHRD V3.3 *-* A0A2K3MX29_TRIPR)
Solyc01g014967	0	0	0	0	0	0	0	0	Retrovirus-related Pol polyprotein from transposon TNT 1-94 (AHRD V3.3 *-* POLX_TOBAC)
Solyc01g014970	0	0	0	0	0	0	0	0	Zinc-finger homeodomain protein 4 (AHRD V3.3 --* ZHD4_ARATH)
Solyc01g014980	0	0	0	0	0	0	0	0	Unknown protein
Solyc01g014990	0	0	0	0	0	0	0	0	Unknown protein
Solyc01g015000	0	0	0.0191237	0	0.193161	0.164933	0.0349617	0	Nitrogen regulatory protein P-II (AHRD V3.3 *-* A0A2G2Z6U6_CAPAN)
Solyc01g015010	0	0	0	0.00543433	0	0	0	0	Unknown protein
Solyc01g015020	15.2598	14.4028	15.5802	14.9749	35.9626	26.4882	30.5008	37.0263	PRLI-interacting factor (AHRD V3.3 *-* AT5G19900.5)
Solyc01g015030	0	0	0	0	0	0	0	0	Unknown protein
Solyc01g015035	0	0	0	0	0	0	0	0	Unknown protein
Solyc01g015050	0	0	0	0	0	0	0	0	factor of DNA methylation 4-like (AHRD V3.3 --* XP_022844165.1)
Solyc01g015060	0	0	0	0	0	0	0	0	XH/XS domain protein (AHRD V3.3 *-* A0A2K3NHW6_TRIPR)
Solyc01g015080	0	0	0	0	0	0	0	0	Peroxidase (AHRD V3.3 *** K4AUE2_SOLLC)
Solyc01g015130	0	0	0	0	0	0	0	0	F-box/LRR-repeat protein (AHRD V3.3 *-* A0A2G2ZYX1_CAPAN)
Solyc01g015133	0	0	0	0	0	0	0	0	Retrovirus-related Pol polyprotein from transposon TNT 1-94 (AHRD V3.3 *-* A0A2I0VJ33_9ASPA)
Solyc01g015137	0	0	0	0	0	0	0	0	Retrovirus-related Pol polyprotein from transposon TNT 1-94 (AHRD V3.3 *-* A0A2I0VJ33_9ASPA)
Solyc01g015180	0	0	0	0	0	0	0	0	F-box/LRR-repeat protein (AHRD V3.3 *-* A0A2G2X6L0_CAPBA)
Solyc01g015185	0	0	0	0	0	0	0	0	Retrovirus-related Pol polyprotein from transposon TNT 1-94 (AHRD V3.3 *-* A0A2I0VJ33_9ASPA)
Solyc01g015200	0	0	0	0	0	0	0	0	Plastid transcriptionally active 3 (AHRD V3.3 *-* F4J3M2_ARATH)
Solyc01g015210	0	0	0	0	0	0	0	0	B3 domain-containing protein (AHRD V3.3 *-* A0A1Q3D9A6_CEPFO)
Solyc01g015230	0	0	0	0	0	0	0	0	Unknown protein
Solyc01g015250	0	0	0	0	0	0	0	0	Unknown protein
Solyc01g015280	0	0	0	0	0	0	0	0	Unknown protein
Solyc01g015290	0	0	0	0	0	0	0	0	cold shock domain protein 1 (AHRD V3.3 --* AT4G36020.3)
Solyc01g015293	2.3282	2.09411	4.49019	6.85182	2.37525	3.72231	5.4817	7.82749	Unknown protein
Solyc01g015297	0	0	0	0	0	0	0	0	Unknown protein
Solyc01g016300	0	0	0	0	0	0	0	0	Unknown protein
Solyc01g016305	0	0	0	0	0	0	0	0	Retrovirus-related Pol polyprotein from transposon TNT 1-94 (AHRD V3.3 *-* A0A2K3NHV2_TRIPR)
Solyc01g016350	0	0	0	0	0	0	0	0	Unknown protein
Solyc01g016355	0.668269	1.03662	0.162463	0.22987	0.0332603	0.0556713	0	0.0314327	receptor-like protein 12 (AHRD V3.3 *-* A0A1U8DTH8_CAPAN)
Solyc01g016380	0.110957	0.234927	0.0554133	0	7.20163	2.0713	0.205404	0.267526	protein trichome birefringence-like (AHRD V3.3 *-* A0A2I4E1G4_9ROSI)
Solyc01g016390	0.0750123	0.0975653	0.0229753	0.0127737	6.60402	1.56453	0.08316	0.153217	protein trichome birefringence-like (AHRD V3.3 *-* A0A2I4E1G4_9ROSI)
Solyc01g016400	0	0	0	0	0.030135	0	0.0475633	0.0710577	Unknown protein
Solyc01g016410	3.58042	3.94951	4.21266	4.24392	6.37239	5.82383	5.82256	6.82759	RING/U-box superfamily protein (AHRD V3.3 *-* A0A2U1PQW6_ARTAN)
Solyc01g016412	0	0	0	0	0	0	0	0	Transposase (AHRD V3.3 *-* F8UTT6_SOLDE)
Solyc01g016414	0.00968567	0	0	0.022118	0.03593	0.0612243	0	0.01401	TCP transcription factor 1 (AHRD V3.3 *** G3BGU2_SOLLC)
Solyc01g016416	0	0	0	0	0	0	0	0	Transposase, Ptta/En/Spm (AHRD V3.3 *-* A0A2U1MQN8_ARTAN)
Solyc01g016418	0	0	0	0	0	0	0	0	Unknown protein
Solyc01g016430	0	0	0	0	0	0	0	0	Unknown protein
Solyc01g016450	0	0	0	0	0	0	0	0	E3 ubiquitin-protein ligase AIP2 (AHRD V3.3 *-* XP_004228345.1)
Solyc01g016460	2.68753	2.59451	1.11059	0.761193	1.84567	2.44534	3.55834	3.8595	Unknown protein
Solyc01g016470	76.5555	74.042	79.983	76.0069	99.5041	96.7973	80.3158	58.4398	60S acidic ribosomal protein P1 (AHRD V3.3 *-* A0A2G2XN91_CAPBA),Pfam:PF00428
Solyc01g016510	0	0	0	0	0	0	0	0	Plant/protein (DUF789) (AHRD V3.3 *-* A0A1P8AV44_ARATH)
Solyc01g016520	0	0	0	0	0	0	0	0	DNA-directed RNA polymerase subunit beta'' (AHRD V3.3 *-* A0A2Z5TZR0_9ASPA)
Solyc01g016530	0	0	0	0	0	0	0	0	hypothetical protein (DUF789) (AHRD V3.3 --* AT1G73210.3)
Solyc01g016540	0	0.0488687	0	0	0	0.109377	0	0	Plant/protein (DUF789) (AHRD V3.3 *** Q8LF98_ARATH)
Solyc01g016545	0	0	0	0	0	0	0	0	Retrovirus-related Pol polyprotein from transposon TNT 1-94 (AHRD V3.3 *-* A0A1J3EPT6_NOCCA)
Solyc01g016550	0	0	0.0301467	0.046401	0	0.145065	0.158023	0.118518	Unknown protein
Solyc01g016560	3.36118	3.07563	3.15111	2.65045	5.63947	4.14275	7.30032	8.55514	Unknown protein
Solyc01g016565	0	0	0	0	0	0	0	0	Retrovirus-related Pol polyprotein from transposon TNT 1-94 (AHRD V3.3 *-* A0A1J3CN06_NOCCA)
Solyc01g016580	0	0	0	0	0	0	0	0	UPF0496 protein 1 (AHRD V3.3 *-* A0A1U8DXI0_CAPAN)
Solyc01g016590	0	0	0	0	0	0	0	0	Unknown protein
Solyc01g016600	0	0	0	0	0	0	0	0	UPF0496 protein (AHRD V3.3 *-* A0A2K3LR63_TRIPR)
Solyc01g016605	0	0	0	0	0	0	0	0	Unknown protein
Solyc01g016630	0	0	0	0	0	0	0	0	Unknown protein
Solyc01g016640	0	0	0	0	0	0	0	0	2-oxoglutarate (2OG) and Fe(II)-dependent oxygenase superfamily protein (AHRD V3.3 *-* A0A2U1NJZ4_ARTAN)
Solyc01g016660	0	0	0	0	0	0	0	0	Starch synthase, chloroplastic/amyloplastic (AHRD V3.3 *-* A0A1J6I800_NICAT)
Solyc01g016665	0	0	0	0	0.001655	0	0	0	protein FAR1-RELATED SEQUENCE 5-like (AHRD V3.3 *** A0A2I4FDV7_9ROSI)
Solyc01g016670	0	0	0	0	0	0	0	0	Unknown protein
Solyc01g016680	0	0	0	0	0	0	0	0	2-oxoglutarate (2OG) and Fe(II)-dependent oxygenase superfamily protein (AHRD V3.3 *-* A0A2U1L2L8_ARTAN)
Solyc01g016685	0	0	0	0	0	0	0	0	Retrovirus-related Pol polyprotein from transposon TNT 1-94 (AHRD V3.3 *-* A0A2I0VNR7_9ASPA)
Solyc01g016690	0	0	0	0	0	0	0	0	Unknown protein
Solyc01g016700	0	0	0	0	0	0	0	0	Unknown protein
Solyc01g016720	0	0	0	0	0	0.0103537	0.026489	0	Unknown protein
Solyc01g016725	0	0	0	0	0	0	0	0	Retrovirus-related Pol polyprotein from transposon TNT 1-94 (AHRD V3.3 *-* A0A2K3LWA1_TRIPR)
Solyc01g016760	0	0	0	0	0	0	0	0	F-box/LRR-repeat protein (AHRD V3.3 *-* XP_004234380.1)
Solyc01g016770	0.0679223	0.116278	0.188787	0.0576927	0.389435	0.53274	0.488737	1.36708	MYB transcription factor (AHRD V3.3 *-* C0PK93_MAIZE)
Solyc01g016780	0.398326	0.137978	0.170031	0.070181	0.147583	0.18181	0.993171	0.292598	transcription factor MYB86-like (AHRD V3.3 *-* XP_004232612.1)
Solyc01g016790	0	0	0	0	0	0	0	0	Unknown protein
Solyc01g016800	0	0	0	0	0	0	0	0	Unknown protein
Solyc01g016830	0	0	0	0	0	0	0	0	Unknown protein
Solyc01g016840	0	0	0	0	0	0	0	0	Unknown protein
Solyc01g016850	0	0	0	0	0	0	0	0	Unknown protein
Solyc01g016870	0	0	0	0	0	0	0	0	Plastid transcriptionally active 3 (AHRD V3.3 *-* F4J3M2_ARATH)
Solyc01g016880	0	0	0	0	0	0	0	0	Unknown protein
Solyc01g016890	0	0	0	0	0	0	0	0	Unknown protein
Solyc01g016900	0	0	0	0	0	0	0	0	Vacuolar protein-sorting-associated protein 33-like protein (AHRD V3.3 *-* A0A1J6K8K8_NICAT)
Solyc01g016910	0	0	0	0	0	0	0	0	Unknown protein
Solyc01g016920	0	0	0	0	0	0	0	0	Plastid transcriptionally active 3 (AHRD V3.3 *-* F4J3M2_ARATH)
Solyc01g016930	0	0	0	0	0	0	0	0	Plastid transcriptionally active 3 (AHRD V3.3 *-* F4J3M2_ARATH)
Solyc01g016940	0	0	0	0	0	0	0	0	Unknown protein
Solyc01g016960	0	0	0	0	0	0	0	0	NBS-coding resistance gene analog (AHRD V3.3 *** B3V7S0_TOBAC)
Solyc01g016970	0.0453397	0.13841	0	0.0807633	0.110364	0	0	0.47349	Unknown protein
Solyc01g016980	0	0	0	0	0	0	0	0	Unknown protein
Solyc01g017020	0	0	0	0	0	0	0	0	Unknown protein
Solyc01g017030	0	0	0	0	0	0	0	0	ARID/BRIGHT DNA-binding domain (AHRD V3.3 *-* A0A200PS47_9MAGN)
Solyc01g017040	0	0	0	0	0	0	0	0	Unknown protein
Solyc01g017050	0	0	0	0	0	0	0	0	Carotenoid cleavage dioxygenase 1 (AHRD V3.3 *-* A0A2U1PPW3_ARTAN)
Solyc01g017060	0	0	0	0	0	0	0	0	Protein Ycf2 (AHRD V3.3 *-* A0A167NIB9_9SOLA)
Solyc01g017070	0	0	0	0	0	0	0	0	Protein Ycf2 (AHRD V3.3 *-* A0A1L2JIZ1_MURKO)
Solyc01g017080	0	0	0	0	0	0	0	0	Protein Ycf2 (AHRD V3.3 *-* A0A2G2XPU4_CAPBA)
Solyc01g017085	0	0	0	0	0	0	0	0	30S ribosomal protein S18, chloroplastic (AHRD V3.3 *** A0A1U8QD82_CAPAN)
Solyc01g017090	0	0	0	0	0	0	0	0	NAD(P)H-quinone oxidoreductase subunit 5, chloroplastic (AHRD V3.3 *-* I6N9A4_DATST)
Solyc01g017100	0	0	0	0	0	0	0	0	NAD(P)H-quinone oxidoreductase subunit 5, chloroplastic (AHRD V3.3 *-* Q9MUA4_9SOLN)
Solyc01g017110	0	0	0	0	0	0	0	0	Protein Ycf2 (AHRD V3.3 *-* A0A251UU76_HELAN)
Solyc01g017120	0	0	0	0	0	0	0	0	Protein Ycf2 (AHRD V3.3 *-* A0A2G3BUH1_CAPCH)
Solyc01g017130	0	0	0	0	0	0	0	0	Protein Ycf2 (AHRD V3.3 *-* A0A167NIB9_9SOLA)
Solyc01g017140	0	0	0	0	0	0	0	0	Protein Ycf2 (AHRD V3.3 *-* A0A0F7BHY0_9SOLA)
Solyc01g017145	0	0	0	0	0	0	0	0	Protein Ycf2 (AHRD V3.3 *-* G0YEE9_CLAVI)
Solyc01g017150	0	0	0	0	0	0	0	0	Ycf15 protein (AHRD V3.3 *** J7H9P3_CAPAN)
Solyc01g017160	0	0	0	0	0	0	0	0	NAD(P)H-quinone oxidoreductase subunit 2, chloroplastic (AHRD V3.3 *-* W8CPX8_PANGI)
Solyc01g017170	0	0	0	0	0	0	0	0	NAD(P)H-quinone oxidoreductase subunit 2, chloroplastic (AHRD V3.3 *-* A0A2P1N7K1_9LAMI)
Solyc01g017180	0	0	0	0	0	0	0	0	NAD(P)H-quinone oxidoreductase subunit 2, chloroplastic (AHRD V3.3 *-* A0A0U5ELY8_IONAC)
Solyc01g017200	0	0	0	0	0	0	0	0	Acetyl-coenzyme A carboxylase carboxyl transferase subunit beta, chloroplastic (AHRD V3.3 *-* ACCD_SOLLC)
Solyc01g017210	0	0	0	0	0	0	0	0	NAD(P)H-quinone oxidoreductase subunit 3, chloroplastic (AHRD V3.3 *** A0A1L5JAF5_CHLPO)
Solyc01g017220	0	0	0	0	0	0	0	0	ATP synthase epsilon chain, chloroplastic (AHRD V3.3 *** A0A1U8QCD5_CAPAN)
Solyc01g017230	0	0	0	0	0	0	0	0	NAD(P)H-quinone oxidoreductase subunit 5, chloroplastic (AHRD V3.3 *-* J7H711_CAPAN)
Solyc01g017240	0	0	0	0	0	0	0	0	Protein TIC 214 (AHRD V3.3 *-* J7H3X3_CAPAN)
Solyc01g017250	0	0	0	0	0	0	0	0	Protein TIC 214 (AHRD V3.3 *-* J7H3X3_CAPAN)
Solyc01g017260	0	0	0	0	0	0	0	0	NAD(P)H-quinone oxidoreductase subunit 2, chloroplastic (AHRD V3.3 *-* A0A125RTJ3_9ASTR)
Solyc01g017280	0	0	0	0	0	0	0	0	Protein Ycf2 (AHRD V3.3 *-* A0A2K9RIX1_GALTE)
Solyc01g017290	0	0	0	0	0	0	0	0	Protein Ycf2 (AHRD V3.3 *-* A0A172MBP1_9SOLA)
Solyc01g017300	0	0	0	0	0	0	0	0	Photosystem I P700 chlorophyll a apoprotein A1 (AHRD V3.3 *-* W6CLH8_9LILI)
Solyc01g017320	0	0	0	0	0	0	0	0	Photosystem I P700 chlorophyll a apoprotein A1 (AHRD V3.3 *-* A0A1S6KJ48_POLSI)
Solyc01g017330	0	0	0	0	0	0	0	0	Photosystem I P700 chlorophyll a apoprotein A1 (AHRD V3.3 *-* A0A059P402_9GENT)
Solyc01g017360	0	0	0	0	0	0	0	0	DNA-directed RNA polymerase subunit beta (AHRD V3.3 *-* A0A1U8QD58_CAPAN)
Solyc01g017370	0	0	0	0	0	0	0	0	DNA-directed RNA polymerase subunit beta' (AHRD V3.3 *-* F6I9L3_9LAMI)
Solyc01g017380	0	0	0	0	0	0	0	0	DNA-directed RNA polymerase subunit beta' (AHRD V3.3 *-* G1FB34_SPIPO)
Solyc01g017390	0	0	0	0	0	0	0	0	RNA polymerase C (AHRD V3.3 *-* A0A023U9U5_9LILI)
Solyc01g017410	0	0	0	0	0	0	0	0	Protein Ycf2 (AHRD V3.3 *-* A0A059Q6L0_HYONI)
Solyc01g017420	0	0	0	0	0	0	0	0	DNA-directed RNA polymerase subunit beta'' (AHRD V3.3 *-* A0A2G2ZTM2_CAPAN)
Solyc01g017430	0	0	0	0	0	0	0	0	Cytochrome b6-f complex subunit 4 (AHRD V3.3 *** A0A2G2XBM1_CAPBA)
Solyc01g017440	0	0	0	0	0	0	0	0	DNA-directed RNA polymerase subunit alpha (AHRD V3.3 *** A0A1U8QD90_CAPAN)
Solyc01g017450	0	0	0	0	0	0	0	0	30S ribosomal protein S11, chloroplastic (AHRD V3.3 *** A0A2S1H791_9ROSA)
Solyc01g017460	0	0	0	0	0	0	0	0	DNA-directed RNA polymerase subunit beta' (AHRD V3.3 *-* A0A2D3C2T2_9LAMI)
Solyc01g017470	0	0	0	0	0	0	0	0	DNA-directed RNA polymerase subunit beta' (AHRD V3.3 *-* A0A1U8QCC2_CAPAN)
Solyc01g017480	0	0	0	0	0	0	0	0	Protein TIC 214 (AHRD V3.3 *-* J7H3X3_CAPAN)
Solyc01g017510	0	0	0	0	0	0	0	0	DNA-directed RNA polymerase subunit beta'' (AHRD V3.3 *-* A0A2P1M6S4_9LAMI)
Solyc01g017520	0	0	0	0	0	0	0	0	ATP synthase subunit a, chloroplastic (AHRD V3.3 *** A0A2G2ZQB4_CAPAN)
Solyc01g017530	0	0	0	0	0	0	0	0	30S ribosomal protein S2 (AHRD V3.3 *** H2BC65_MOLVE)
Solyc01g017535	0	0	0	0	0	0	0	0	Unknown protein
Solyc01g017540	0	0	0	0	0	0	0	0	Dirigent protein (AHRD V3.3 *** K4AUT5_SOLLC)
Solyc01g017560	0	0.015823	0.276865	0.405345	0.124805	0.428383	0.191189	0.245446	Unknown protein
Solyc01g017565	0	0	0	0	0.161009	0	0	0	Retrovirus-related Pol polyprotein from transposon TNT 1-94 (AHRD V3.3 *-* A0A2K3NZR4_TRIPR)
Solyc01g017600	116.263	153.244	63.0496	75.0693	123.651	64.3253	12.5415	14.459	transmembrane protein 45B-like (AHRD V3.3 *** A0A2I4DQK0_9ROSI)
Solyc01g017610	0	0	0	0	0	0	0	0	Tryptophan aminotransferase-related protein 2 (AHRD V3.3 *** A0A2G3ANV2_CAPAN)
Solyc01g017620	0	0	0	0	0	0	0	0	Tryptophan aminotransferase-related protein 1 (AHRD V3.3 *-* A0A2G2VMW5_CAPBA)
Solyc01g017640	0	0	0	0	0	0	0	0	Unknown protein
Solyc01g017670	0	0	0	0	0	0	0	0	Unknown protein
Solyc01g017675	0	0	0	0	0	0	0	0	Retrovirus-related Pol polyprotein from transposon TNT 1-94 (AHRD V3.3 *-* A0A2K3MW90_TRIPR)
Solyc01g017690	0	0	0	0	0	0	0	0	NBS-coding resistance gene analog (AHRD V3.3 *-* B3V7R7_TOBAC)
Solyc01g017700	0	0	0	0	0	0	0	0	NBS-LRR protein (AHRD V3.3 --* Q9SM52_SOLAC)
Solyc01g017720	2.17693	2.07235	1.07312	1.13753	0	0.295725	0.491888	0.371334	Unknown protein
Solyc01g017725	0	0	0	0	0	0	0	0	Unknown protein
Solyc01g017740	0	0	0	0	0	0	0	0	Cytochrome b6 (AHRD V3.3 *-* A0A1U8QCH4_CAPAN)
Solyc01g017750	0	0	0	0	0	0	0	0	Unknown protein
Solyc01g017790	0	0	0	0	0	0	0	0	ARID/BRIGHT DNA-binding domain-containing protein (AHRD V3.3 *-* F4I2F0_ARATH)
Solyc01g017795	0	0	0	0	0	0	0	0	Unknown protein
Solyc01g017820	0	0	0	0	0	0	0	0	F-box/LRR-repeat protein (AHRD V3.3 *-* A0A1U8G7I8_CAPAN)
Solyc01g017825	0	0	0	0	0	0	0	0	Replication protein A 70 kDa DNA-binding subunit B (AHRD V3.3 --* RFA1B_ORYSJ)
Solyc01g017860	2.17988	2.01765	1.54052	2.11851	1.78585	2.14141	2.63031	2.68481	Unknown protein
Solyc01g017870	0.046978	0	51.2566	0	26.4961	5.36918	0.203684	0.43173	Unknown protein
Solyc01g017873	0	0	0	0	0	0	0.0227153	0	Unknown protein
Solyc01g017877	0	0	0	0	0	0	0	0	Ty3/gypsy retrotransposon protein (AHRD V3.3 *-* A0A2K3NTW1_TRIPR)
Solyc01g017950	0	0	0	0	0	0	0	0	Unknown protein
Solyc01g017960	0	0	0	0	0	0	0	0	Unknown protein
Solyc01g017970	0	0	0	0	0	0	0	0	Unknown protein
Solyc01g018010	2.99103	1.51902	2.34117	2.58353	2.30378	2.13329	1.79163	2.40691	Unknown protein
Solyc01g018015	0	0	0	0	0	0	0	0	acidic leucine-rich nuclear phosphoprotein 32 family member E-like (AHRD V3.3 --* XP_010327604.1)
Solyc01g018020	0	0.0563373	0.0270927	0.00750633	0.105505	0.0227313	0.0449687	0.056508	Transketolase (AHRD V3.3 *** A0A200R5S8_9MAGN)
Solyc01g018040	0	0	0	0	0	0	0	0	protein FAR1-RELATED SEQUENCE 5-like (AHRD V3.3 *-* A0A2I4FDV7_9ROSI)
Solyc01g018045	0	0	0	0	0	0	0	0	Retrovirus-related Pol polyprotein from transposon TNT 1-94 (AHRD V3.3 *-* A0A2I0X1H4_9ASPA)
Solyc01g018070	0	0	0	0	0	0	0	0	ARID/BRIGHT DNA-binding domain (AHRD V3.3 *-* A0A200PS47_9MAGN)
Solyc01g018100	0	0	0.08512	0	0.0334973	0	0	0	Unknown protein
Solyc01g019100	0	0	0	0	0	0	0	0	Unknown protein
Solyc01g020100	0	0	0	0	0	0	0	0	Unknown protein
Solyc01g020110	0	0	0	0	0	0	0	0	E3 ubiquitin protein ligase DRIP2 (AHRD V3.3 *-* A0A2G2X5V3_CAPBA)
Solyc01g020113	0	0	0	0	0	0	0	0	DREB2A-interacting protein 1 (AHRD V3.3 --* AT1G06770.1)
Solyc01g020117	0	0	0	0	0	0	0	0	2-alkenal reductase (NADP(+)-dependent)-like (AHRD V3.3 *-* A0A2I4GX13_9ROSI)
Solyc01g020120	0	0	0	0	0	0	0	0	DNA helicase (AHRD V3.3 *-* A0A2G3A9H6_CAPAN)
Solyc01g020130	0.265579	0.213168	0.829321	0.801024	0.305039	1.4941	2.10434	2.26337	Glycosyltransferases (AHRD V3.3 *-* K4D5Z0_SOLLC)
Solyc01g020150	0.678291	0.65401	0.983509	0.899513	0.436971	1.77673	2.3874	2.64677	Glycosyltransferases (AHRD V3.3 *-* K4D5Z0_SOLLC)
Solyc01g020160	0	0.018717	0	0.0633793	0	0.15245	0.112662	0.363393	transcription factor bHLH95-like (AHRD V3.3 *-* XP_019067769.1)
Solyc01g020170	0	0	0	0	0	0	0	0	bHLH transcription factor 074
Solyc01g020180	0	0	0	0	0	0	0	0	transcription factor bHLH95-like (AHRD V3.3 *-* A0A2I4FIQ6_9ROSI)
Solyc01g020190	0.869517	0.64921	0.609217	0.529741	1.2422	1.68496	1.46723	0.820889	RING/FYVE/PHD zinc finger superfamily protein (AHRD V3.3 *-* F4JV39_ARATH)
Solyc01g020220	0.861544	0.571243	0.668467	0.731738	1.05643	1.48685	2.039	2.53133	Replication factor C subunit 3 (AHRD V3.3 *** A0A1U8E9Y1_CAPAN),Pfam:PF13177
Solyc01g020240	20.3141	21.1976	24.27	26.5463	16.8076	26.6471	29.6308	27.5274	hypothetical protein (AHRD V3.3 *** AT1G09290.1)
Solyc01g020245	0	0	0	0	0	0	0	0	Unknown protein
Solyc01g020280	0	0	0	0	0	0	0	0	Unknown protein
Solyc01g020290	0	0	0	0	0	0	0	0	60S ribosomal protein L7a (AHRD V3.3 *-* A0A2G2XPX1_CAPBA)
Solyc01g020300	0	0	0	0	0	0	0	0	Unknown protein
Solyc01g020320	10.3596	13.7596	13.2732	16.0207	12.606	14.627	16.0797	13.6741	hypothetical protein (AHRD V3.3 *** AT2G20480.1)
Solyc01g020323	0.0158523	0.0539117	0.018031	0.0723597	0.0294137	0.0759613	0.081188	0.122901	Glucan endo-1,3-beta-glucosidase 6 (AHRD V3.3 *-* A0A2G2XC72_CAPBA)
Solyc01g020327	0	0	0	0	0.0263047	0.0622253	0	0	Pectate lyase (AHRD V3.3 *-* A0A2G3B368_CAPCH)
Solyc01g020340	0.45784	0.293385	0.3448	0.314286	0.711866	0.391219	1.01206	1.10466	Pentatricopeptide repeat-containing protein (AHRD V3.3 *-* A0A2U1MY66_ARTAN)
Solyc01g020343	0.386635	0.631313	0.16213	0	0.435992	0.643428	1.04	0.938104	Unknown protein
Solyc01g020347	0.482857	0.16115	0.217407	0.067976	0.678453	0.474241	0.657438	1.16117	Unknown protein
Solyc01g020350	0	0	0	0	0.321485	0	0.132813	0.123989	pentatricopeptide repeat-containing protein At5g66520-like (AHRD V3.3 *-* A0A2I4FSH7_9ROSI)
Solyc01g020353	0.494074	0.220571	0.196037	0.074556	0.516832	0.644123	1.06453	1.05253	Retrovirus-related Pol polyprotein from transposon TNT 1-94 (AHRD V3.3 *-* A0A2K3MQ97_TRIPR)
Solyc01g020357	0.645835	0.842615	0.263411	0.201323	0.679764	0.632298	1.20666	1.33778	Unknown protein
Solyc01g020360	0	0	0.194035	0.132318	2.19314	1.73081	0	0	Unknown protein
Solyc01g020370	0	0	0	0	0	0	0	0	Unknown protein
Solyc01g020372	0.0219723	0.030674	0	0.00798433	0	0	0	0	Transposase (AHRD V3.3 *-* A0A0B4ULM0_ORYSJ)
Solyc01g020430	0	0	0	0	0.0446473	0	0	0	Unknown protein
Solyc01g020440	16.6594	16.7233	21.974	20.5812	18.1875	28.367	36.2668	33.1	Replication factor C subunit 3 (AHRD V3.3 *** A0A1U8E9Y1_CAPAN)
Solyc01g020450	0	0	0	0	0	0	0	0	Unknown protein
Solyc01g020460	0	0	0	0	0	0	0	0	orf82 (chloroplast) (AHRD V3.3 *-* YP_008994037.1)
Solyc01g020470	0	0	0	0	0	0	0	0	NADH dehydrogenase subunit 9 (AHRD V3.3 *** A0A290WKX8_SOLLC)
Solyc01g020480	0	0	0	0	0	0	0	0	DUF659 domain-containing protein (AHRD V3.3 *-* A0A1Q3DB12_CEPFO)
Solyc01g020490	0	0	0	0	0	0	0	0	HAT transposon superfamily (AHRD V3.3 --* A0A2U1MJ98_ARTAN)
Solyc01g020495	0.281102	0.101089	0.240881	0.087002	0.914875	0.538033	1.9393	2.21316	Unknown protein
Solyc01g020500	1.32408	0.946015	0.725458	0.454495	1.8983	1.5563	3.53604	3.2761	Unknown protein
Solyc01g020510	0	0	0	0	0	0	0	0	Protein Ycf2 (AHRD V3.3 *-* A0A2G2Z199_CAPAN)
Solyc01g020520	0.977651	0.979712	0.938045	1.03791	1.30699	1.57297	3.01288	2.97466	Membrane-bound transcription factor site-2 protease (AHRD V3.3 *** A0A200QAL7_9MAGN)
Solyc01g020521	0	0	0	0	0	0	0	0	Unknown protein
Solyc01g020522	0	0	0	0	0	0	0	0	Unknown protein
Solyc01g020524	0	0	0	0	0	0	0	0	4-hydroxy-3-methylbut-2-enyl diphosphate reductase, chloroplastic (AHRD V3.3 *-* A0A2G2W0B0_CAPBA)
Solyc01g020526	0	0	0	0	0	0	0	0	Pectate lyase (AHRD V3.3 *-* A0A2G3B368_CAPCH)
Solyc01g020528	0	0	0	0	0	0	0	0	4-hydroxy-3-methylbut-2-enyl diphosphate reductase, chloroplastic (AHRD V3.3 *-* A0A2G3CTC6_CAPCH)
Solyc01g020570	0	0	0	0	0	0	0	0	Calcium-transporting ATPase (AHRD V3.3 *-* A0A2G2VW56_CAPBA)
Solyc01g020575	0	0	0	0	0	0	0	0	Unknown protein
Solyc01g021600	1.18822	1.10921	0.768323	0.988978	0.354303	0.593129	0.167801	0.622755	Dirigent protein (AHRD V3.3 *** K4AV41_SOLLC)
Solyc01g021610	0	0	0	0	0	0	0	0	Unknown protein
Solyc01g021620	0	0	0	0	0	0	0	0	Dirigent protein (AHRD V3.3 *** H8ZXA8_SOLTU)
Solyc01g021640	5.91081	5.52666	4.52655	5.30615	7.41906	7.27024	8.65012	8.49051	Transducin/WD40 repeat-like superfamily protein (AHRD V3.3 *** AT5G17370.1)
Solyc01g021680	0	0	0	0	0	0.050175	0.117278	0.0473037	DUF4371 domain-containing protein (AHRD V3.3 *-* A0A1Q3C0Y0_CEPFO)
Solyc01g021685	0	0	0.182579	0	0.996358	0.063229	0	0	E3 ubiquitin protein ligase DRIP2 (AHRD V3.3 *-* A0A2G2X5V3_CAPBA)
Solyc01g021690	0	0	0	0	0.08581	0	0	0	E3 ubiquitin protein ligase DRIP1-like (AHRD V3.3 *-* XP_025888788.1)
Solyc01g021695	0	0	0	0	0.131676	0	0	0	Unknown protein
Solyc01g021700	0	0	0	0	0	0	0	0	Photosystem II CP43 reaction center protein (AHRD V3.3 *-* A0A2G2WUM4_CAPBA)
Solyc01g021720	0.394104	0.197946	0.20042	0.153613	0.571585	0.45511	1.13954	1.00924	Unknown protein
Solyc01g021730	0.093038	0.0709137	2.7521	0.401379	8.11679	1.69519	0.767651	0.968487	NAC domain-containing protein (AHRD V3.3 *-* A0A2U1NIJ0_ARTAN)
Solyc01g021740	0	0	0	0	0	0	0	0	Mitochondrial carrier domain-containing protein (AHRD V3.3 *-* A0A2U1LMU6_ARTAN)
Solyc01g021745	0	0	0.0417823	0	1.01252	0.0986703	0	0	Unknown protein
Solyc01g022740	3.40765	3.51616	3.78071	3.63004	3.56021	5.96959	6.87375	7.66606	F-box/kelch-repeat protein (AHRD V3.3 *** A0A2G3DG30_CAPCH)
Solyc01g022745	0	0	0	0	0	0	0	0	Retrovirus-related Pol polyprotein from transposon TNT 1-94 (AHRD V3.3 *-* A0A2I0VJ33_9ASPA)
Solyc01g022750	86.0938	103.743	101.28	108.038	120.8	122.99	91.8423	84.6891	NADH dehydrogenase [ubiquinone] 1 alpha subcomplex subunit 6 (AHRD V3.3 *** A0A1U8GJI0_CAPAN)
Solyc01g022760	0	0	0	0	0	0	0	0	Unknown protein
Solyc01g022780	0	0	0	0	0	0	0	0	fibril-forming collagen alpha chain-like (AHRD V3.3 *-* XP_022866881.1)
Solyc01g022785	0	0	0	0	0	0	0	0	Unknown protein
Solyc01g028800	0.143755	0.190364	1.10667	0.465232	11.9218	4.34254	2.69441	3.52326	Pumilio-like protein 11 (AHRD V3.3 *** A0A2G2XPL6_CAPBA)
Solyc01g028803	6.43054	3.70736	1.91471	1.97668	0.229955	0.578802	0.802683	0.737539	Cytochrome P450 (AHRD V3.3 *** A0A200R9G0_9MAGN)
Solyc01g028807	32.0487	40.7046	4.36521	12.6672	0.206179	1.05785	2.05047	4.08897	Unknown protein
Solyc01g028810	507.474	572.466	280.665	355.595	286.902	317.808	353.003	362.085	Beta chaperonin 60 (AHRD V3.3 *** Q0W9E2_SOLCO)
Solyc01g028830	34.3501	43.0103	26.4356	33.5419	9.38442	15.0866	32.144	33.3261	Protein kinase domain (AHRD V3.3 *** A0A200R109_9MAGN)
Solyc01g028860	85.0301	80.479	87.2946	86.0603	92.0898	116.824	145.526	149.619	Evolutionarily conserved C-terminal region 2 (AHRD V3.3 *** F4JDC2_ARATH)
Solyc01g028865	0.189796	0.0984967	0	0	0	0	0	0	Unknown protein
Solyc01g028870	31.964	35.9752	19.4836	24.3387	13.104	19.3482	22.6307	22.0601	Antitermination NusB domain-containing protein (AHRD V3.3 *** Q93XY7_ARATH)
Solyc01g028875	0	0	0	0	0	0	0	0	Retrovirus-related Pol polyprotein from transposon TNT 1-94 (AHRD V3.3 *-* A0A2K3MN99_TRIPR)
Solyc01g028900	71.3551	77.3301	64.5638	84.4813	65.0394	108.546	115.041	122.551	2-oxoisovalerate dehydrogenase subunit beta, mitochondrial (AHRD V3.3 *** A0A2G3DFR9_CAPCH)
Solyc01g028910	0	0	0	0	0	0	0	0	Protein kinase-like protein (AHRD V3.3 *-* B6ZA83_HELAN)
Solyc01g028930	17.2614	18.2358	19.7851	21.7303	22.3834	26.6261	25.2212	24.0803	TATA-box-binding protein (AHRD V3.3 *** A0A1U8HIY4_CAPAN)
Solyc01g028960	0	0	0	0	0	0	0	0	Unknown protein
Solyc01g028965	0	0	0	0	0	0	0	0	DEAD-box ATP-dependent RNA helicase (AHRD V3.3 *-* A0A1Y1II36_KLENI)
Solyc01g028980	0	0	0	0	0	0	0	0	Unknown protein
Solyc01g028985	0	0	0	0	0	0	0	0	Retrovirus-related Pol polyprotein from transposon TNT 1-94 (AHRD V3.3 *-* A0A2I0VJ33_9ASPA)
Solyc01g033990	0	0	0	0	0	0	0	0	inositol-1%2C4%2C5-trisphosphate 5-phosphatase (AHRD V3.3 *-* AT5G54870.1)
Solyc01g033995	0	0	0	0	0	0	0	0	Flavin-containing monooxygenase (AHRD V3.3 *-* A0A2G2V7T6_CAPBA)
Solyc01g034010	0	0	0	0	0	0	0	0	Serine/threonine-protein phosphatase 7 long form-like protein (AHRD V3.3 *-* A0A1J3IZ43_NOCCA)
Solyc01g034020	33.6929	31.1877	36.405	34.278	38.5473	42.8549	47.0259	43.3865	Serine/threonine-protein phosphatase (AHRD V3.3 *** A0A2G3DEI1_CAPCH)
Solyc01g034040	0	0	0	0	0	0	0	0	Transposase, Ptta/En/Spm (AHRD V3.3 *-* A0A2U1KQG6_ARTAN)
Solyc01g034050	0	0	0	0	0	0	0	0	Histone-lysine N-methyltransferase ASHR1 (AHRD V3.3 *-* A0A2G2WJX2_CAPBA)
Solyc01g034070	0	0	0	0	0	0	0	0	replication factor-A carboxy-terminal domain protein (AHRD V3.3 *** AT2G28105.2)
Solyc01g034075	0	0	0	0	0	0	0	0	Retrovirus-related Pol polyprotein from transposon TNT 1-94 (AHRD V3.3 *-* POLX_TOBAC)
Solyc01g034080	0.387774	0.401962	0.751379	0.376581	2.27537	1.41825	1.35946	1.35577	Amino acid/polyamine transporter I (AHRD V3.3 *** A0A200RCI7_9MAGN)
Solyc01g034140	0	0	0	0	0	0	0	0	Unknown protein
Solyc01g034145	0	0	0	0	0	0	0	0	Retrovirus-related Pol polyprotein from transposon TNT 1-94 (AHRD V3.3 *-* A0A2I0VJ33_9ASPA)
Solyc01g034150	3.648	3.24191	2.43446	1.95279	3.82103	3.86615	6.3341	6.49019	DNA polymerase eta (AHRD V3.3 *** A0A2G3AIQ2_CAPAN)
Solyc01g034190	0	0	0	0	0	0	0	0	B3 DNA binding domain (AHRD V3.3 *-* A0A200PVN0_9MAGN)
Solyc01g034210	0	0	0	0	0	0	0	0	Retrovirus-related Pol polyprotein from transposon TNT 1-94 (AHRD V3.3 *-* A0A2K3MPB2_TRIPR),Pfam:PF14223
Solyc01g034213	0	0	0	0	0	0	0	0	Unknown protein
Solyc01g034217	0	0	0	0	0	0	0	0	Unknown protein
Solyc01g038230	0	0	0	0	0	0	0	0	Unknown protein
Solyc01g038231	0	0	0	0	0	0	0	0	Unknown protein
Solyc01g038232	0	0	0	0	0	0	0	0	Unknown protein
Solyc01g038233	0	0	0	0	0	0	0	0	Unknown protein
Solyc01g038234	0	0	0	0	0	0	0	0	Unknown protein
Solyc01g038236	0	0	0	0	0	0	0	0	Unknown protein
Solyc01g038238	0	0	0	0	0	0	0	0	Unknown protein
Solyc01g044270	7.73034	8.12401	8.92728	7.75359	10.533	10.6716	13.6185	15.433	DnaJ domain (AHRD V3.3 *** A0A200QGM0_9MAGN)
Solyc01g044275	0	0	0	0	0	0	0	0	Unknown protein
Solyc01g044300	0	0	0	0	0	0	0	0	Unknown protein
Solyc01g044340	1.38619	1.13977	3.09677	2.69299	6.78887	3.62534	5.56585	8.05173	RBR-type E3 ubiquitin transferase (AHRD V3.3 *-* A0A2G3AIF0_CAPAN)
Solyc01g044350	2.79372	3.3683	4.176	3.05388	8.71672	7.91862	7.46761	8.11632	RBR-type E3 ubiquitin transferase (AHRD V3.3 *** A0A2G2XPJ0_CAPBA)
Solyc01g044360	25.2238	23.2227	27.1548	26.4576	31.3624	33.004	44.3646	49.4301	importin-5-like (AHRD V3.3 *** A0A2I4FSB4_9ROSI)
Solyc01g044365	0.611201	0.806006	0.392142	0.585491	0.387553	0.789277	0.932064	1.61806	Alg9-like mannosyltransferase family (AHRD V3.3 --* AT5G14850.2)
Solyc01g044370	0.714385	0.633118	0.32035	0.394008	0.384571	0.520856	0.510731	0.568532	Molybdenum cofactor sulfurase family protein (AHRD V3.3 *** A0A2U1MM41_ARTAN)
Solyc01g044375	0.786653	0.102309	0.062757	0.0488243	0.266198	0.031088	0.118994	0.267669	Molybdenum cofactor sulfurase (AHRD V3.3 *-* A0A200QQK0_9MAGN)
Solyc01g044420	0	0.0322083	0.104205	0	0.301621	0.028666	0.036786	0.009712	Calmodulin binding protein (AHRD V3.3 *** A0A2K3N563_TRIPR)
Solyc01g044490	25.177	26.8856	25.6465	25.9636	30.4475	33.05	32.0486	28.5876	Elongation factor P (AHRD V3.3 *** B6TVD2_MAIZE)
Solyc01g044500	0	0	0	0	0	0	0	0	Unknown protein
Solyc01g044520	0.0500807	0	0	0.093644	0.0175667	2.90655	1.04458	1.1396	LOB domain-containing protein (AHRD V3.3 *** A0A2U1QNF0_ARTAN)
Solyc01g044523	0	0	0	0	0	0	0	0	Unknown protein
Solyc01g044527	0	0	0	0	0	0	0	0	Retrovirus-related Pol polyprotein from transposon TNT 1-94 (AHRD V3.3 *-* A0A2K3LF16_TRIPR)
Solyc01g044550	0	0	0	0	0	0	0	0	2-oxoglutarate (2OG) and Fe(II)-dependent oxygenase superfamily protein (AHRD V3.3 *-* A0A2U1N5S2_ARTAN)
Solyc01g044551	0	0	0	0	0	0	0	0	Cytochrome P450 (AHRD V3.3 *-* A0A200Q4B5_9MAGN)
Solyc01g044552	0	0	0	0	0	0	0	0	Unknown protein
Solyc01g044554	0.013199	0	0	0	0	0	0	0	2-oxoglutarate (2OG) and Fe(II)-dependent oxygenase superfamily protein (AHRD V3.3 *** A0A2U1P7E5_ARTAN)
Solyc01g044556	1.49029	1.33661	0.239982	0.316107	0.910115	1.22109	2.18092	1.48885	TPX2 (targeting protein for Xklp2) protein family (AHRD V3.3 --* AT4G32330.4)
Solyc01g044558	5.74411	5.36047	1.6179	1.68572	3.683	4.16783	7.64982	7.88542	Cyclin-A1-1 (AHRD V3.3 *-* A0A1U8GEH4_CAPAN)
Solyc01g047580	0	0	0	0	0	0	0	0	Signal recognition particle subunit SRP72 (AHRD V3.3 *-* A0A2G2YL73_CAPAN)
Solyc01g049650	47.2964	46.5646	46.2915	52.9885	70.6305	49.9425	41.7051	44.3994	Pyruvate kinase (AHRD V3.3 *** A0A2G2XPN6_CAPBA)
Solyc01g049660	0	0	0	0	0	0	0	0	S2-locus F-box protein (AHRD V3.3 *** Q6JE34_PETIN)
Solyc01g049680	57.6473	55.97	50.0957	50.1115	50.6695	52.4936	47.7478	42.5064	Transcription factor Pur-alpha 1 (AHRD V3.3 *** A0A2G2W459_CAPBA)
Solyc01g049690	45.6835	36.9407	49.3349	51.5992	45.6016	42.9285	47.813	47.7611	transcription factor Pur-alpha 1 (AHRD V3.3 *-* A0A2I4G155_9ROSI)
Solyc01g049720	0	0	0	0	0	0	0	0	Unknown protein
Solyc01g049740	0	0	0	0	0	0	0	0	SNF2 domain-containing protein CLASSY 4 (AHRD V3.3 *-* A0A1J3JCP1_NOCCA)
Solyc01g049750	0	0	0	0	0	0	0	0	Unknown protein
Solyc01g049760	0	0	0	0	0	0	0	0	Glycosyltransferase (AHRD V3.3 *-* A0A2I4GXB6_9ROSI)
Solyc01g049770	30.4546	26.7401	6.72925	5.77412	14.6538	14.5427	19.128	17.919	Unknown protein
Solyc01g049790	0	0	0	0	0	0	0	0	Glycosyltransferase (AHRD V3.3 *-* I1WYF2_PAELC)
Solyc01g049810	0.819256	1.00093	0.970071	0.915268	1.25756	1.57566	1.51603	1.85918	Pentatricopeptide repeat (AHRD V3.3 *** A0A200RCJ8_9MAGN)
Solyc01g049820	0.209895	0.235872	0.0903023	0.0360743	0.201544	0.0431237	0.136569	0.0972637	kinesin-like protein KIF3A isoform X3 (AHRD V3.3 *** A0A2I4G0Z7_9ROSI)
Solyc01g049830	0.144963	0.152683	0	0	0.0113867	0	0	0.10218	Kinesin (AHRD V3.3 *-* A0A200Q0B0_9MAGN)
Solyc01g049840	0.034316	0.110804	0	0	0	0	0.0324	0.0487207	Kinesin (AHRD V3.3 *-* A0A200Q0B0_9MAGN)
Solyc01g049880	15.0673	23.0691	6.32279	13.8163	2.02654	5.73389	7.91219	12.6387	Unknown protein
Solyc01g049890	132.929	139.944	171.524	192.644	124.677	155.758	106.499	107.161	2-C-methyl-D-erythritol 4-phosphate cytidylyltransferase (AHRD V3.3 *** Q93WB8_ARATH)
Solyc01g049910	0.873344	1.02322	1.07728	1.05745	1.07674	1.44277	2.43215	2.60785	Membrane-bound transcription factor site-2 protease (AHRD V3.3 *** A0A200QAL7_9MAGN)
Solyc01g049920	0.884013	0.659502	0.576285	0.523506	0.374466	1.96886	2.81193	2.65731	Unknown protein
Solyc01g049950	0	0	0	0	0	0	0	0	Ribosomal protein L5 (AHRD V3.3 *-* A0A290WL59_SOLLC)
Solyc01g049960	74.7879	80.9423	79.2859	87.0065	67.6451	84.0182	75.7975	69.2874	chromosome-associated kinesin (AHRD V3.3 *** AT4G26410.1)
Solyc01g050010	3.03169	3.45927	1.83103	1.85732	2.86112	3.73576	5.77791	5.68208	Zinc finger BED domain-containing protein DAYSLEEPER (AHRD V3.3 *** A0A1J3I687_NOCCA)
Solyc01g050040	4.21562	4.15768	3.07409	3.58698	3.65291	0.405977	7.72443	9.08065	RING/U-box superfamily protein (AHRD V3.3 *-* Q9FM98_ARATH)
Solyc01g050045	0.0444517	0.076151	0.500451	0.377588	0.698983	1.51797	0.100716	0.172161	Unknown protein
Solyc01g050050	0	0	0.344662	0.265255	0.478436	0.100229	0.881708	0.834108	Unknown protein
Solyc01g050070	7.40041	7.54574	10.5023	10.1015	9.74665	10.0446	9.72789	9.33027	Transmembrane protein (AHRD V3.3 *** A0A1P8AMQ6_ARATH)
Solyc01g055160	0	0	0	0	0	0	0	0	S3-locus SLFlike1 protein (AHRD V3.3 *** A0A076YJN5_PETIN)
Solyc01g055165	0	0	0	0	0	0	0	0	Retrovirus-related Pol polyprotein from transposon TNT 1-94 (AHRD V3.3 *-* A0A2I0VJ33_9ASPA)
Solyc01g055200	0	0	0	0	0	0	0	0	S10-ribonuclease (AHRD V3.3 *** Q00591_PETHY)
Solyc01g056200	0	0	0	0	0	0	0	0	cyclin-dependent kinase F-4 isoform X1 (AHRD V3.3 --* XP_019070805.1)
Solyc01g056220	0	0	0	0	0.136184	0	0	0	S2-locus F-box type-11 protein (AHRD V3.3 *** A0A076YEX4_PETIN)
Solyc01g056240	0.196905	0.0977393	0.143879	0	0	0.04791	0.261801	0.171931	S-locus F-box-like protein a (AHRD V3.3 *-* B0F0G2_PETIN)
Solyc01g056250	0	0	0	0	0	0	0	0	S2-locus F-box protein (AHRD V3.3 *-* Q6JE34_PETIN)
Solyc01g056260	0.991237	1.5699	0.751377	0.688484	0.176335	0.248714	0.244192	0.249628	Unknown protein
Solyc01g056280	0	0	0	0.0152147	0.0270273	0.013129	0	0.028097	S2-locus F-box protein (AHRD V3.3 *** Q6JE34_PETIN)
Solyc01g056285	0	0	0	0	1.0202	0.0898857	0	0	S3-locus F-box type-4 protein (AHRD V3.3 *** A0A076YGV2_PETIN)
Solyc01g056290	0	0	0	0	0	0	0	0.026668	mediator of RNA polymerase II transcription subunit 3-like (AHRD V3.3 --* XP_010321536.1)
Solyc01g056310	1.22174	0.939359	1.35	0.536728	516.473	80.1136	0.0530297	0.0439597	anther-specific LAT51
Solyc01g056320	0.848353	0.72483	1.56191	1.07826	2.09706	2.78126	3.30219	3.41189	Unknown protein
Solyc01g056330	0	0	0	0	0	0	0	0	DNA-directed RNA polymerase subunit beta (AHRD V3.3 *-* A0A2G2V8P8_CAPBA)
Solyc01g056340	6.17906	5.62794	5.14683	4.94036	6.17552	6.95632	8.46458	8.92715	de-etiolated 1
Solyc01g056360	0	0.048015	0	0	31.3717	5.16991	0	0	Unknown protein
Solyc01g056370	0	0	0	0	0	0	0	0	Unknown protein
Solyc01g056380	0	0	0	0	0.116113	0	0	0	Nodulin/glutamine synthase-like protein (AHRD V3.3 *-* F4J9A0_ARATH)
Solyc01g056390	0	0	0	0	0	0	0	0	nodulin/glutamine synthase-like protein (AHRD V3.3 *-* AT3G53180.1)
Solyc01g056400	0	0	0	0	0.0394633	0	0	0	Glutamine synthetase (AHRD V3.3 *-* I6WUR4_CAMSI)
Solyc01g056410	0	0	0	0	0	0	0	0	Nodulin/glutamine synthase-like protein (AHRD V3.3 *-* F4J9A0_ARATH)
Solyc01g056420	0	0	0	0	0	0	0	0	Ribonuclease H domain (AHRD V3.3 *** A0A200RDX4_9MAGN)
Solyc01g056430	0	0	0	0	0.0972367	0	0	0	Glutamine synthetase (AHRD V3.3 *-* I6WUR4_CAMSI)
Solyc01g056440	0	0	0	0	0	0	0	0	Nodulin/glutamine synthase-like protein (AHRD V3.3 *-* F4J9A0_ARATH)
Solyc01g056450	0	0	0	0	0	0	0	0	Glutamine synthetase (AHRD V3.3 *-* I6WUR4_CAMSI)
Solyc01g056460	0	0	0	0	0	0	0	0	Protein Ycf2 (AHRD V3.3 *-* A0A1B0VVX8_9LAMI)
Solyc01g056470	0	0	0	0	0	0	0	0	Photosystem II CP43 reaction center protein (AHRD V3.3 *-* A0A2S0SUS0_9FABA)
Solyc01g056480	1.52582	1.80938	1.6424	2.23723	1.53737	1.86029	1.44922	2.58156	Unknown protein
Solyc01g056520	4.24555	4.20021	3.42248	3.66058	8.96648	6.04095	7.69332	8.51245	ARM repeat superfamily protein (AHRD V3.3 *** AT5G06120.9)
Solyc01g056530	0	0	0	0	0	0	0	0	Oligopeptide transporter (AHRD V3.3 *-* A0A200RAW0_9MAGN)
Solyc01g056570	8.71769	9.33366	9.37015	10.6263	14.4647	14.6677	15.6608	19.9897	Regulator of chromosome condensation (AHRD V3.3 *** A0A200PRS6_9MAGN)
Solyc01g056575	0	0	0	0	0	0	0	0	Reverse transcriptase (AHRD V3.3 *-* Q8W452_BRANA)
Solyc01g056580	0.112664	0.176528	0.034666	0.0860507	2.83504	1.06507	0.206101	0.248631	L-aspartate oxidase (AHRD V3.3 *-* A0A2G3CUJ1_CAPCH)
Solyc01g056590	0	0	0	0	0	0	0	0	transcription initiation factor TFIID subunit (AHRD V3.3 *-* AT5G65540.1)
Solyc01g056600	2.9711	3.0688	3.45343	4.04732	4.21327	5.79595	6.04006	6.9706	Double-stranded RNA-binding protein 1 (AHRD V3.3 *-* A0A2G2XPY3_CAPBA)
Solyc01g056610	0	0	0	0.0383943	0	0.0660037	0	0.009308	Unknown protein
Solyc01g056620	6.24512	6.33546	5.63079	7.21151	6.73684	10.1066	10.0509	10.5123	Double-stranded RNA-binding protein 1 (AHRD V3.3 *** A0A2G2XPY3_CAPBA)
Solyc01g056640	0	0	0	0	0	0	0	0	Unknown protein
Solyc01g056650	0	0	0	0	0	0	0	0	Starch synthase, chloroplastic/amyloplastic (AHRD V3.3 *-* A0A2G2XJF0_CAPBA)
Solyc01g056653	0	0	0	0	0	0	0	0	Unknown protein
Solyc01g056657	0	0	0	0	0	0	0	0	Unknown protein
Solyc01g056660	0	0	0	0	0.115603	0	0	0	S3 putative F-box protein SLF-S3B (AHRD V3.3 *** Q64HD2_PETHY)
Solyc01g056665	0	0	0	0	0	0	0	0	Unknown protein
Solyc01g056690	11.0662	9.41431	9.11583	10.0005	9.38512	11.1195	14.4994	13.8658	Protein kinase and PP2C-like domain-containing protein (AHRD V3.3 *** A0A2G3AJ12_CAPAN)
Solyc01g056695	0	0	0	0	0	0	0	0	Ty3/gypsy retrotransposon protein (AHRD V3.3 *-* A0A2K3MZI3_TRIPR)
Solyc01g056720	27.7704	31.6275	27.7534	34.0181	38.0324	40.5972	32.3283	37.1106	small basic intrinsic protein 2.1
Solyc01g056730	0	0	0	0	0	0	0	0	Unknown protein
Solyc01g056750	0	0	0	0	0	0	0	0	Zinc finger, CCHC-type (AHRD V3.3 *-* A0A2U1PD96_ARTAN)
Solyc01g056760	0	0	0	0	0	0	0	0	Zinc finger, CCHC-type (AHRD V3.3 *-* A0A2U1MSA1_ARTAN)
Solyc01g056770	0	0	0	0	0.137401	0	0	0	Unknown protein
Solyc01g056780	298.286	403.366	101.362	131.231	51.7224	72.7914	52.1545	50.2318	50S ribosomal protein L34 (AHRD V3.3 *** A0A1U8FLP5_CAPAN)
Solyc01g056790	1.09773	1.25341	1.59605	1.53439	1.32087	1.94032	2.19135	2.48748	Exostosin-like protein (AHRD V3.3 *-* A0A2U1QBT5_ARTAN)
Solyc01g056800	2.57842	2.02963	1.92149	2.54003	1.78077	3.35002	3.04466	3.3069	Exostosin-like protein (AHRD V3.3 *-* Q2HVN7_MEDTR)
Solyc01g056810	6.33965	6.4183	6.93602	8.00671	5.58563	10.8637	12.6126	13.7096	Syntaxin (AHRD V3.3 *** A0F0A7_NICBE)
Solyc01g056830	2.2397	3.10634	4.60075	4.08302	2.74573	5.3369	5.64573	8.40096	Syntaxin (AHRD V3.3 *-* A0F0A7_NICBE)
Solyc01g056840	0	0	0	0	0	0	0	0	DNA-directed RNA polymerase subunit beta'' (AHRD V3.3 *-* A0A2L1ZQP9_9LAMI)
Solyc01g056850	5.79301	4.02012	15.3516	8.73351	61.0752	30.2113	37.9663	32.2427	CTP synthase (AHRD V3.3 *** A0A2G2XFG8_CAPBA)
Solyc01g056880	0	0	0	0	0	0	0	0	Heme-binding-like protein, chloroplastic (AHRD V3.3 *-* A0A2G2VV44_CAPBA)
Solyc01g056890	0	0	0.01807	0	0	0	0	0	protein CURVATURE THYLAKOID 1A, chloroplastic-like (AHRD V3.3 *-* XP_004248070.1)
Solyc01g056900	0	0	0	0	0	0	0	0	Protein CURVATURE THYLAKOID 1A, chloroplastic (AHRD V3.3 --* A0A2G3BDI0_CAPCH)
Solyc01g056910	0	0	0	0	0	0	0	0	Protease Do-like 7 (AHRD V3.3 *-* A0A2G3AAM6_CAPAN)
Solyc01g056940	115.869	125.27	156.27	131.719	106.035	156.228	135.163	101.955	Ubiquitin (AHRD V3.3 *** B1P770_LOLTE)
Solyc01g056950	0	0	0	0	0	0	0	0	4-hydroxy-4-methyl-2-oxoglutarate aldolase (AHRD V3.3 *-* A0A2G3CF74_CAPCH)
Solyc01g056960	0	0	0	0	0	0	0	0	ABC transporter C family member 8 (AHRD V3.3 *-* A0A2G3CNG8_CAPCH)
Solyc01g056970	0	0	0	0	0	0	0	0	protein PELPK2-like (AHRD V3.3 *** XP_004229132.1)
Solyc01g056990	1.59784	1.78551	2.7579	2.07735	6.11459	5.42135	6.04818	5.35323	hypothetical protein (AHRD V3.3 *** AT5G06590.1)
Solyc01g057000	0.829978	1.02034	6.76695	11.2176	4.32717	5.18513	0.935885	0.657484	Universal stress protein
Solyc01g057003	0	0	0	0	0	0	0	0	binding protein (AHRD V3.3 *-* AT2G25570.3)
Solyc01g057007	0	0	0	0	0	0	0	0	RNA-directed DNA polymerase (AHRD V3.3 *-* A0A2I0W3D4_9ASPA)
Solyc01g057010	0	0	0	0	0.0113083	0	0	0	S3-locus F-box type-14 protein (AHRD V3.3 *** A0A076YJL9_PETIN)
Solyc01g057020	7.96368	7.80137	9.68143	7.99801	9.04371	9.7548	15.3552	16.0856	protein TRIGALACTOSYLDIACYLGLYCEROL 4, chloroplastic-like (AHRD V3.3 *-* A0A2I4DQN1_9ROSI)
Solyc01g057060	0	0	0	0	0	0	0	0	Methyltransferase (AHRD V3.3 *-* A0A2U1QFS7_ARTAN),Pfam:PF03602
Solyc01g057080	0.32931	0.140091	0.277502	0	0.261158	0.046016	0	0.0471507	Ethylene-responsive transcription factor (AHRD V3.3 *-* A0A2G2X462_CAPBA)
Solyc01g057090	8.41767	7.82209	10.9497	11.7115	9.0929	15.4702	18.4384	18.3506	DUF2215 domain-containing protein (AHRD V3.3 *** A0A1Q3D866_CEPFO)
Solyc01g057110	0	0	0	0	0	0	0	0	Unknown protein
Solyc01g057113	0	0	0	0	0	0	0	0	Retrovirus-related Pol polyprotein from transposon TNT 1-94 (AHRD V3.3 *-* A0A2I0XIZ1_9ASPA)
Solyc01g057117	0	0	0	0	0	0.01359	0	0.127694	Unknown protein
Solyc01g057120	0	0	0	0	0	0	0	0	Unknown protein
Solyc01g057130	0	0	0	0	0	0	0	0	Unknown protein
Solyc01g057133	0	0	0	0	0	0	0	0	Retrovirus-related Pol polyprotein from transposon TNT 1-94 (AHRD V3.3 *-* A0A2K3NZR4_TRIPR)
Solyc01g057137	0.03519	0	0.0122737	0	0	0.0106097	0.00932333	0	Carboxypeptidase (AHRD V3.3 *-* A0A1U8HG02_CAPAN)
Solyc01g057140	0	0	0	0	0	0	0	0	Unknown protein
Solyc01g057150	0.114684	0.0215107	0	0.0635483	0.232448	0.138004	0.353201	0.384667	Unknown protein
Solyc01g057160	1.362	0.803128	2.63457	2.87298	4.7787	4.23953	4.37447	5.68804	Unknown protein
Solyc01g057165	0.901075	0.618674	0.178337	0.32154	0.400409	0.606766	0.711361	1.06741	Unknown protein
Solyc01g057180	0	0	0	0	0	0	0	0	Unknown protein
Solyc01g057185	0	0	0	0	0	0	0	0.040244	Eukaryotic translation initiation factor 3 subunit A (AHRD V3.3 *-* A0A2G3AVW5_CAPCH)
Solyc01g057190	0	0	0	0	0.955176	0.0297	0	0	S-locus F-box-like protein d (AHRD V3.3 *** B0F0G0_PETIN)
Solyc01g057200	23.9354	32.5089	15.5101	17.3846	9.35347	14.2189	19.4313	22.1565	Pentatricopeptide repeat-containing protein (AHRD V3.3 *** A0A2U1QJ39_ARTAN)
Solyc01g057210	28.3116	24.9956	22.9784	23.2157	19.5556	23.2481	23.6502	24.3512	Mitochondrial pyruvate dehydrogenase kinase (AHRD V3.3 *** E5GC37_CUCME)
Solyc01g057220	0.0480337	0.133794	0.140146	0.153176	0.00643	0.187361	0.0255463	0.101304	Pectinesterase (AHRD V3.3 *** A0A1Q3CE67_CEPFO)
Solyc01g057250	0	0	0	0	0	0	0	0	50S ribosomal protein L3 (AHRD V3.3 *-* A0A2G3A2L4_CAPAN)
Solyc01g057255	0	0	0	0	0	0	0	0	DEAD-box ATP-dependent RNA helicase 8-like (AHRD V3.3 --* XP_021838650.1)
Solyc01g057260	1.60553	1.96104	1.7548	2.49901	0.376282	0.242494	0.460016	0.409757	Transmembrane protein, putative (DUF247) (AHRD V3.3 *** F4IZB4_ARATH)
Solyc01g057270	0.218799	0.286698	2.69871	0.422955	18.4126	4.84461	1.1856	1.28756	Calmodulin-binding transcription factor SR4 (AHRD V3.3 *** H8ZRY5_SOLLC)
Solyc01g057300	0.0380463	0.041269	0	0.039304	0	0.059967	0.111713	0.331324	bHLH transcription factor 002
Solyc01g057310	3.31508	3.16313	4.366	2.39775	2.20672	4.41518	11.1409	13.4235	Phragmoplast orienting kinesin 2 (AHRD V3.3 *** A0A2G2XPE0_CAPBA)
Solyc01g057320	0.728044	0.543938	1.3508	1.00311	0.644765	1.309	3.76195	5.92627	Kinesin (AHRD V3.3 *-* A0A200QSU4_9MAGN)
Solyc01g057330	0.0163973	0	0	0.0687207	0.152802	0	0	0	Metal-nicotianamine transporter YSL1 (AHRD V3.3 *-* A0A2G3CXV2_CAPCH)
Solyc01g057340	4.62309	4.3237	2.88761	3.35786	3.9154	4.36781	6.63557	7.05145	Unknown protein
Solyc01g057350	0	0	0.084552	0	0.080706	0	0.052137	0.083317	Unknown protein
Solyc01g057390	0	0	0	0	0	0	0	0	ATP-dependent DNA helicase (AHRD V3.3 *-* A0A2G3C774_CAPCH)
Solyc01g057395	0	0	0	0	0	0	0	0	Unknown protein
Solyc01g057410	0	0	0	0	0	0	0	0	Unknown protein
Solyc01g057420	0	0	0	0	0	0	0	0	Unknown protein
Solyc01g057430	0.500758	0.941335	0.342542	0.16998	0.976228	0.476572	1.08116	1.08117	Acetyl-coenzyme A carboxylase carboxyl transferase subunit alpha, chloroplastic (AHRD V3.3 *-* A0A2G2W5S4_CAPBA)
Solyc01g057435	0	0	0	0	0	0	0	0	Retrovirus-related Pol polyprotein from transposon TNT 1-94 (AHRD V3.3 *-* A0A2K3N4Z1_TRIPR)
Solyc01g057440	0.288921	0.221769	0.253201	0.179942	0.567551	0.617837	0.79719	0.941054	Unknown protein
Solyc01g057445	11.3058	13.4512	13.1364	17.1384	8.39589	12.7252	9.55349	8.85721	Mediator of RNA polymerase II transcription subunit 15a (AHRD V3.3 *-* A0A2G2ZG46_CAPAN)
Solyc01g057470	0	0	0	0	0	0	0	0	Unknown protein
Solyc01g057510	0.00976733	0	1.9215	0.111677	15.7569	3.55785	0.138178	0.0416477	Bax inhibitor 1 (AHRD V3.3 *** A0A2G2XLQ4_CAPBA)
Solyc01g057520	5.80695	4.7289	6.95582	5.90777	6.9338	10.2165	17.6083	17.2318	ARM repeat superfamily protein (AHRD V3.3 *** F4J550_ARATH)
Solyc01g057523	0	0	0	0	0	0	0	0	Retrovirus-related Pol polyprotein from transposon TNT 1-94 (AHRD V3.3 *** A0A2I0VNR7_9ASPA)
Solyc01g057527	0	0	0	0	0	0	0	0	Unknown protein
Solyc01g057530	0	0	0	0	0	0	0	0	COBRA-like protein 1 (AHRD V3.3 *-* A0A2G2X9E0_CAPBA)
Solyc01g057570	11.4534	11.6954	16.0612	16.9216	11.5388	22.8061	24.6672	24.1901	alpha-ketoglutarate-dependent dioxygenase alkB homolog 6-like (AHRD V3.3 *** A0A2I4HR29_9ROSI)
Solyc01g057580	0	0	0	0	0	0	0	0	Protein kinase superfamily protein (AHRD V3.3 *-* A0A2U1PBH2_ARTAN)
Solyc01g057585	0	0	0	0	0	0	0	0	Unknown protein
Solyc01g057590	0	0	0.163009	0	2.7534	0.58397	0	0.0263727	Unknown protein
Solyc01g057600	0.260746	0.192173	0.531209	0.980991	0.0979113	0	0.091439	0.083428	Unknown protein
Solyc01g057610	0	0	0	0	0	0	0	0	Unknown protein
Solyc01g057640	0	0	0	0	0	0	0	0	Unknown protein
Solyc01g057660	0	0	0	0	0	0	0	0	LOW QUALITY PROTEIN: uncharacterized protein LOC112191941 (AHRD V3.3 --* XP_024187199.1)
Solyc01g057670	0	0	0	0	0	0	0	0	DnaJ heat shock n-terminal domain-containing protein (AHRD V3.3 *** A0A2K3NVM9_TRIPR)
Solyc01g057675	0	0	0	0	0	0	0	0	Unknown protein
Solyc01g057680	0	0	0.0655627	0.126039	2.75171	3.49045	0	0.0462857	Unknown protein
Solyc01g057690	0	0	0	0	0.0241933	0	0	0	Cell division cycle protein 48-like protein (AHRD V3.3 *-* A0A2G2WIS5_CAPBA)
Solyc01g057700	0	0	0	0	0.0390113	0.102584	0	0	Calcium-dependent protein kinase (AHRD V3.3 *** E5GCJ4_CUCME)
Solyc01g057703	0	0	0	0	0.026692	0.0241263	0	0	ATP-dependent DNA helicase (AHRD V3.3 *-* A0A2K3NWY8_TRIPR)
Solyc01g057705	0.0141263	0	0	0	0.00728633	0	0	0	histidine--tRNA ligase, chloroplastic/mitochondrial (AHRD V3.3 *-* A0A2I4EMG2_9ROSI)
Solyc01g057707	0.989264	1.25742	0.705263	1.4491	0.43268	1.0409	0.338259	0.297796	Pentatricopeptide repeat-containing protein (AHRD V3.3 *-* A0A2G3BR55_CAPCH)
Solyc01g057740	0	0.028027	0	0	0	0	0	0	Ribonuclease H protein (AHRD V3.3 *-* A0A2I0V757_9ASPA)
Solyc01g057760	11.1462	11.7028	12.4859	10.086	19.0257	19.7373	28.0809	33.5468	RNA helicase DEAD2
Solyc01g057770	73.1244	51.3374	26.2852	26.3412	17.6126	24.1256	39.5213	40.8665	HCO3-transporter family (AHRD V3.3 *** A0A2U1KUW6_ARTAN)
Solyc01g057780	15.1197	15.8949	7.11424	7.98383	8.73625	11.8106	14.8961	16.7692	Zinc finger protein VAR3, chloroplastic (AHRD V3.3 *** A0A2G3BZA0_CAPCH)
Solyc01g057785	0.134498	0.081123	0.23833	0	0.849613	0.0868163	0.223748	0.090234	Unknown protein
Solyc01g057830	270.21	315.619	91.5792	119.697	47.9882	69.123	63.9229	59.9712	30S ribosomal protein S1 protein (AHRD V3.3 *** A0A2U1PM45_ARTAN)
Solyc01g057840	8.46698	7.94121	9.21249	7.44598	11.2083	14.1825	17.4429	17.1353	Nuclear export mediator factor Nemf (AHRD V3.3 *** A0A1J3J1R1_NOCCA)
Solyc01g057850	2.78396	2.51136	5.03797	5.00596	5.60814	5.63495	8.90636	12.3597	nuclear export mediator factor NEMF-like (AHRD V3.3 *** A0A2I4F1S6_9ROSI),Pfam:PF05833
Solyc01g057853	0.523767	0.395524	0.141701	0.44826	0.422254	0.25584	0.532131	0.753556	Unknown protein
Solyc01g057855	0	0	0	0	0	0	0.0852607	0	Unknown protein
Solyc01g057857	0	0	0	0	0	0	0	0	Peptidyl-prolyl cis-trans isomerase PASTICCINO1 (AHRD V3.3 *-* A0A2G2Y582_CAPAN)
Solyc01g057900	9.14432	8.75146	9.3755	10.2077	16.2432	14.6763	19.3089	21.3039	E3 ubiquitin-protein ligase UPL6 (AHRD V3.3 *** A0A2G3DDX0_CAPCH)
Solyc01g057903	0	0	0	0	0	0	0	0	Unknown protein
Solyc01g057907	0	0	0	0	0	0	0	0	PttA' (AHRD V3.3 *-* O22369_PETHY)
Solyc01g057910	1.27628	1.10407	0.924862	1.25031	0.559748	1.19307	0.726739	0.973198	R2R3MYB transcription factor 2
Solyc01g057920	0	0	0	0	0	0	0	0	Unknown protein
Solyc01g057940	0	0	0.055439	0	0	0.0593587	0.122173	0.110748	Protein TRIGALACTOSYLDIACYLGLYCEROL 1, chloroplastic (AHRD V3.3 *-* A0A2G3D103_CAPCH)
Solyc01g057960	0	0	0	0	0.0310723	0	0.013627	0.117695	Homeobox leucine-zipper protein (AHRD V3.3 *-* Q8H963_ZINVI)
Solyc01g057990	0	0	0	0	0	0	0	0	Unknown protein
Solyc01g058000	0	0.033739	0	0	0	0	0	0	DNA-directed RNA polymerase subunit beta (AHRD V3.3 *-* A0A2G2XEV3_CAPBA)
Solyc01g058003	0	0	0	0	0	0	0	0	Reverse transcriptase (AHRD V3.3 *-* Q8W452_BRANA)
Solyc01g058007	0	0	0	0	0	0	0	0	Retrovirus-related Pol polyprotein from transposon TNT 1-94 (AHRD V3.3 *-* A0A2K3NZR4_TRIPR)
Solyc01g058010	6.53609	4.9026	3.46282	3.80884	8.30098	7.89348	12.5587	12.8984	Neutral/alkaline invertase (AHRD V3.3 *** G5DC09_MANES)
Solyc01g058020	9.83418	7.07555	4.53736	4.85984	8.48073	9.00502	13.2394	10.7255	Neutral/alkaline invertase (AHRD V3.3 *-* H6V7I6_MANES)
Solyc01g058030	0.0236327	0.0211157	0.888238	0.0860473	0.277616	6.87664	6.09678	5.6196	Gibberellin 2-oxidase (AHRD V3.3 *** A4GVL5_SOLLC)
Solyc01g058040	0.038997	0	0.494754	0	0	5.15921	5.25308	4.65201	gibberellin 2-beta-dioxygenase 2-like (AHRD V3.3 *-* A0A2I4DNY4_9ROSI)
Solyc01g058050	0	0	0	0	0	0	0	0	Unknown protein
Solyc01g058060	0	0	0	0	0	0	0.0335247	0	40S ribosomal protein S15-like (AHRD V3.3 --* NP_001274973.1)
Solyc01g058070	0	0	0	0	0	0	0	0	nucleosome assembly protein 1-4 (AHRD V3.3 --* XP_004241880.1)
Solyc01g058080	0	0	0	0	0	0.019272	0	0	LOW QUALITY PROTEIN: probable helicase CHR10 (AHRD V3.3 --* XP_010325463.2)
Solyc01g058100	1.21795	1.27376	2.82086	1.58252	2.07733	2.11099	4.96717	7.04133	Unknown protein
Solyc01g058120	0	0	0	0	0	0	0	0	Glycerate dehydrogenase HPR, peroxisomal (AHRD V3.3 *-* A0A2G2WJW2_CAPBA)
Solyc01g058130	0	0	0	0	0	0	0	0	C2H2-type zinc finger protein (AHRD V3.3 --* NP_001241325.1)
Solyc01g058140	16.8339	15.8304	17.1585	17.9471	12.4223	18.92	24.7329	26.768	beta-glycosidase 2
Solyc01g058160	5.17496	4.67689	4.49343	3.32507	4.26999	7.95462	12.4936	14.2809	Duf724 domain-containing protein 3 (AHRD V3.3 *** A0A314KQ04_NICAT)
Solyc01g058170	10.1589	9.80589	6.42428	5.01425	6.25775	11.307	19.5141	17.9482	Agenet domain containing protein (AHRD V3.3 *** A0A2P5F5R4_TREOI)
Solyc01g058175	0	0	0	0	0	0	0.0151483	0	Unknown protein
Solyc01g058190	44.293	57.3131	23.4513	28.6386	21.6803	30.2433	28.3002	28.7597	30S ribosomal protein S6 (AHRD V3.3 *-* A0A1J3K846_NOCCA)
Solyc01g058200	0.0835583	0.13142	0.055198	0.266734	0.113879	0.28228	0.240221	0.348155	Unknown protein
Solyc01g058205	1.60682	1.40412	1.47811	1.68394	2.8058	2.31238	3.06788	3.64596	Pentatricopeptide repeat-containing protein (AHRD V3.3 *** A0A2G2XPG9_CAPBA)
Solyc01g058210	0	0	0	0	0	0	0	0	Villin (AHRD V3.3 *-* A0A2P5EN25_TREOI)
Solyc01g058220	0	0	0	0	0	0	0	0	Rhodanese-like domain-containing protein chloroplastic-like (AHRD V3.3 *-* A0A2K3P8I3_TRIPR)
Solyc01g058225	0	0	0	0	0.284423	0	0	0	myosin 1 (AHRD V3.3 --* NP_001104925.1)
Solyc01g058240	0	0	0	0	0	0	0	0	Unknown protein
Solyc01g058245	0	0	0	0	0	0	0	0	Retrovirus-related Pol polyprotein from transposon TNT 1-94 (AHRD V3.3 *-* A0A2K3NZR4_TRIPR)
Solyc01g058250	0.0167157	0	0	0	0.104325	0	0.0347177	0.0377987	2-oxoglutarate (2OG) and Fe(II)-dependent oxygenase superfamily protein (AHRD V3.3 *** Q9SYM7_ARATH)
Solyc01g058260	31.2952	23.076	12.7849	13.5478	21.9944	23.4103	30.0348	30.7409	Nuclear poly(A) polymerase 3 (AHRD V3.3 *** A0A2G3B5G8_CAPCH)
Solyc01g058270	4.41708	3.63573	3.80237	4.22856	4.15037	5.66095	8.06339	8.13431	O-acetyltransferase family protein (AHRD V3.3 *** A0A2U1M4H7_ARTAN)
Solyc01g058280	50.6979	49.1942	50.1709	48.1867	53.1283	49.5635	42.8036	36.1984	ER membrane protein complex subunit 6-like (AHRD V3.3 *** A0A2I4GTM2_9ROSI)
Solyc01g058320	22.8053	22.6729	13.0115	21.5744	10.5968	10.5956	8.88791	10.7367	transmembrane protein (AHRD V3.3 *-* AT3G17120.5)
Solyc01g058325	0.097132	0.06251	0.0610613	0	0	0	0	0	Unknown protein
Solyc01g058340	0	0	0	0	0	0	0	0	Unknown protein
Solyc01g058350	1.03924	0.513126	0.298648	0.241865	1.66221	0.968386	0.891647	1.04544	Unknown protein
Solyc01g058360	0	0	0	0	0	0	0	0	protein ZINC INDUCED FACILITATOR-LIKE 1-like (AHRD V3.3 *** A0A2I4H204_9ROSI)
Solyc01g058380	0	0	0	0	0	0	0	0	Coatomer subunit gamma (AHRD V3.3 *-* A0A2G3BVT4_CAPCH)
Solyc01g058385	0	0	0	0	0	0	0	0	Unknown protein
Solyc01g058390	24.2369	25.191	23.4284	29.2814	32.3235	20.5366	16.4569	15.7342	Galactokinase (AHRD V3.3 *** A0A2G3AJ57_CAPAN)
Solyc01g058400	0	0	0	0	0	0	0	0	Transcription factor (AHRD V3.3 *-* A0A1U8FBH1_CAPAN)
Solyc01g058450	9.77188	8.94397	11.1423	11.2107	14.1767	17.8059	21.542	23.5226	Flowering time control protein FCA (AHRD V3.3 *** A0A2G2XPK6_CAPBA)
Solyc01g058470	13.2685	10.7746	12.1341	9.22097	17.7186	21.1709	33.9815	32.5911	Unknown protein
Solyc01g058520	0.519935	0.397096	46.6177	3.4985	462.189	90.681	1.01052	1.3849	Peroxidase (AHRD V3.3 *** K4AW60_SOLLC)
Solyc01g058530	3.38427	3.49811	3.55478	3.77357	3.57889	4.46786	5.36067	5.15767	Ribosomal protein S18 (AHRD V3.3 *-* A0A2Z5UCK0_CUSJA)
Solyc01g058535	0.512185	0.494912	0.393584	0.266879	0.809339	0.237719	1.11264	1.72588	Unknown protein
Solyc01g058540	0.24142	0.359876	0.275732	0.127066	0.172203	0.503849	0.4086	0.242756	WRKY transcription factor 47
Solyc01g058550	0	0	0	0	0	0	0	0	DDT domain-containing protein PTM (AHRD V3.3 *-* XP_010313253.1)
Solyc01g058590	0	0	0	0	0	0	0	0	Ubiquitin-like domain-containing CTD phosphatase (AHRD V3.3 *-* A0A2G2W8N6_CAPBA)
Solyc01g058593	0	0	0	0	0	0	0	0	Zinc finger BED domain-containing protein RICESLEEPER 2 (AHRD V3.3 *-* A0A2U1KM29_ARTAN)
Solyc01g058597	0	0	0	0	0	0	0	0	Prefoldin subunit 3 (AHRD V3.3 *-* A0A2G2ZJK0_CAPAN)
Solyc01g058660	0	0	0	0	0	0	0	0	Unknown protein
Solyc01g058665	0	0	0	0	0	0	0	0	Unknown protein
Solyc01g058670	51.8151	61.9943	64.2856	72.0909	60.9837	95.07	131.809	152.763	Transcription factor (AHRD V3.3 *** A0A2G3DG53_CAPCH)
Solyc01g058673	0	0	0	0	0	0	0	0	Unknown protein
Solyc01g058677	0	0	0	0	0	0	0	0	Unknown protein
Solyc01g058680	0	0	0	0	0	0	0	0	Sister chromatid cohesion 1 protein 4 (AHRD V3.3 *-* A0A2G3DGK5_CAPCH)
Solyc01g058685	0	0	0	0	0	0	0	0	Retrovirus-related Pol polyprotein from transposon TNT 1-94 (AHRD V3.3 *** A0A2I0VVU6_9ASPA)
Solyc01g058690	0	0	0	0	0	0	0	0	zinc finger CCCH domain-containing protein 41-like (AHRD V3.3 *-* A0A2I4HUT1_9ROSI)
Solyc01g058700	0	0	0	0	0.018623	0	0	0	Sister chromatid cohesion 1 protein 4 (AHRD V3.3 *-* A0A2G3DGK5_CAPCH)
Solyc01g058705	0	0	0	0	0	0	0	0	SNF2 domain-containing protein CLASSY 4-like (AHRD V3.3 *-* XP_010319906.1)
Solyc01g058720	17.86	11.2716	5.53823	4.44149	73.409	27.0966	10.5315	8.78755	Calcium-binding EF-hand (AHRD V3.3 *** A0A2U1NQC6_ARTAN)
Solyc01g058730	21.7835	21.0714	25.5704	28.4545	32.6065	43.3038	46.967	53.0041	Transmembrane protein (AHRD V3.3 *** F4JLQ2_ARATH)
Solyc01g058740	0	0	0	0	0	0	0	0	ninja-family protein AFP3-like (AHRD V3.3 *-* XP_010315661.1)
Solyc01g059740	0	0	0	0	0	0	0	0	ninja-family protein AFP3-like (AHRD V3.3 *** XP_019067583.1)
Solyc01g059750	0	0	0	0	0	0	0	0	RRM_1 domain-containing protein/NTF2 domain-containing protein (AHRD V3.3 --* A0A1Q3C3M0_CEPFO)
Solyc01g059760	0	0	0	0	0	0	0	0.0523487	sentrin-specific protease 2-like isoform X1 (AHRD V3.3 --* XP_024160256.1)
Solyc01g059765	0	0	0	0	0	0	0	0	Unknown protein
Solyc01g059780	0.0204057	0	0	0	0	0	0	0	ninja-family protein AFP3-like (AHRD V3.3 *-* XP_019067583.1)
Solyc01g059800	0	0	0	0	0	0.0523287	0	0	Unknown protein
Solyc01g059810	0	0	0	0	0	0	0	0	Unknown protein
Solyc01g059820	0	0	0	0	0	0	0	0	Unknown protein
Solyc01g059830	30.2953	33.9845	30.3492	34.9589	27.2913	30.8729	19.1388	20.0035	Enoyl-CoA hydratase (AHRD V3.3 *** A0A1Y1IHV1_KLENI)
Solyc01g059840	0	0	0	0	0	0	0	0	GDSL esterase/lipase (AHRD V3.3 *** A0A2U1MC12_ARTAN)
Solyc01g059850	0	0	0	0	0.0545057	0.0778843	0	0	Vacuolar-processing enzyme (AHRD V3.3 *-* A0A1U8GC96_CAPAN)
Solyc01g059860	7.88467	6.97328	8.35051	9.19045	10.3446	12.5626	17.4405	21.1024	MAP kinase kinase kinase 3
Solyc01g059870	16.802	12.8244	14.6445	16.6236	7.5313	11.2597	17.1486	20.8584	phytochrome B1
Solyc01g059880	32.9027	26.7237	45.6259	44.658	64.939	48.7903	37.4049	39.7436	Citrate synthase-like (AHRD V3.3 *** A0A200R252_9MAGN)
Solyc01g059885	0	0	0	0	0	0	0	0	Transposase, MuDR, plant (AHRD V3.3 *-* A0A1R3JVA4_COCAP)
Solyc01g059900	0.468211	0.313678	0.330625	0.823962	1.38278	0.342919	0.0644057	0.414483	Dirigent protein (AHRD V3.3 *** K4AW97_SOLLC)
Solyc01g059910	0.004773	0	0	0	0.002983	0	0	0	Receptor-like protein kinase FERONIA (AHRD V3.3 *** A0A2G3C1K8_CAPCH)
Solyc01g059920	4.75039	4.62961	4.98306	4.62239	5.33284	7.23085	10.542	9.83286	Nucleic acid-binding, OB-fold (AHRD V3.3 *** A0A2U1P485_ARTAN)
Solyc01g059930	149.088	179.867	153.749	180.483	136.498	123.601	82.014	77.2432	Adenine nucleotide alpha hydrolases-like superfamily protein (AHRD V3.3 *** Q9M9P5_ARATH)
Solyc01g059940	0.0290127	0.046145	0.018898	0.0497567	2.03661	0.310938	0	0	Plant invertase/pectin methylesterase inhibitor superfamily protein (AHRD V3.3 *-* F4JC28_ARATH)
Solyc01g059950	0.0304067	0.0232147	0.101901	0.124656	2.43839	0.224144	0.031748	0.18402	Transcription factor GRAS (AHRD V3.3 *-* A0A200PWC4_9MAGN)
Solyc01g059960	0	0	0	0	0	0	0	0	Transcription factor GRAS (AHRD V3.3 *** A0A200PWC4_9MAGN)
Solyc01g059965	5.26635	2.49104	0	0	0	0	0	0	Glucan endo-1,3-beta-glucosidase B (AHRD V3.3 *** E13B_SOLLC)
Solyc01g060010	0	0	0	0	0	0	0	0	Glucan endo-1,3-beta-glucosidase (AHRD V3.3 *** A0A2G3BH97_CAPCH)
Solyc01g060015	0	0.0625717	0	0	0	0	0	0	Glucan endo-1,3-beta-glucosidase (AHRD V3.3 *-* A0A2I0XDS5_9ASPA)
Solyc01g060020	5.12286	4.04197	0	0	0	0	0	0	beta-1,3-glucanase TOMB13GLUB
Solyc01g060030	39.4543	41.2433	54.528	53.9266	37.5838	55.3962	54.1238	55.3554	Zinc finger CCHC domain-containing protein 10 (AHRD V3.3 *** A0A2G3ART8_CAPCH)
Solyc01g060040	5.20098	4.75738	4.93104	4.07398	11.7451	8.40998	12.3824	13.5673	WD40 domain-containing protein/Bromodomain domain-containing protein (AHRD V3.3 *** A0A1Q3BSD0_CEPFO)
Solyc01g060050	0.92559	0.843037	1.64822	1.32259	3.86062	2.09942	4.33901	5.78949	WD40 domain-containing protein (AHRD V3.3 *** A0A2K3NUT6_TRIPR)
Solyc01g060053	0	0	0	0	0	0	0	0	PttA' (AHRD V3.3 *-* O22369_PETHY)
Solyc01g060055	0	0	0	0	0	0	0	0	Unknown protein
Solyc01g060057	0	0	0	0	0	0	0	0	Unknown protein
Solyc01g060070	6.36564	6.9088	8.03169	7.42484	90.8453	35.4392	11.4017	10.8251	Outer envelope pore protein 16-2, chloroplastic (AHRD V3.3 *** A0A2G2XR36_CAPBA),Pfam:PF02466
Solyc01g060080	10.6904	11.0673	8.23242	8.59689	13.9475	12.5878	18.0839	18.0544	serine/threonine-protein phosphatase 4 regulatory subunit 3-like (AHRD V3.3 *-* A0A2I4F1X2_9ROSI)
Solyc01g060090	2.45634	1.83608	2.96072	3.46151	5.302	3.62343	6.88725	8.55146	serine/threonine-protein phosphatase 4 regulatory subunit 3-like (AHRD V3.3 *-* A0A2I4F1X2_9ROSI)
Solyc01g060100	0.394398	0.558536	1.06519	0.837544	0.929992	0.957432	1.54191	2.56766	serine/threonine-protein phosphatase 4 regulatory subunit 3-like (AHRD V3.3 --* XP_004229001.1)
Solyc01g060130	32.8282	27.6382	35.7912	22.9826	41.567	37.0506	36.076	25.0351	TOMGTPASE Mill. GTPase
Solyc01g060140	22.5044	20.7292	16.6247	19.0642	13.8014	22.2545	27.501	31.0913	Calmodulin-binding transcription activator 5 (AHRD V3.3 *-* A0A2G2XR50_CAPBA)
Solyc01g060160	0.0250323	0.113983	0.00183233	0	0.00156467	0.009541	0.034772	0.0365703	Mitochondrial-processing peptidase subunit beta (AHRD V3.3 *-* A0A2G3B7D4_CAPCH)
Solyc01g060170	4.72411	4.0851	6.73703	8.76849	5.0123	6.87005	9.39327	15.423	Calmodulin-binding transcription activator (AHRD V3.3 *-* A0A1I9LRY6_ARATH)
Solyc01g060180	37.5518	37.65	12.7056	15.7866	4.41964	11.138	10.6055	11.5235	AMP-dependent synthetase/ligase (AHRD V3.3 *** A0A200R265_9MAGN)
Solyc01g060183	0	0	0	0	0	0	0	0	Zinc finger, GRF-type (AHRD V3.3 *** A0A2U1QJI6_ARTAN)
Solyc01g060187	0.0165217	0.0458313	0	0	0.120399	0	0	0	Unknown protein
Solyc01g060200	0.0986357	0.165417	0.163337	0.0789993	1.10645	0.472409	0.66758	0.857037	3'-5' exonuclease domain (AHRD V3.3 *** A0A200QLJ1_9MAGN)
Solyc01g060210	1.28755	1.11008	1.32653	0.887248	0.924136	2.0457	3.05323	3.89362	XH/XS domain-containing protein (AHRD V3.3 *-* Q9M150_ARATH)
Solyc01g060220	0	0	0	0	0.316556	0.0678927	0	0.0775163	Unknown protein
Solyc01g060240	43.2808	53.1468	28.5612	45.1152	36.5835	24.265	14.1748	12.2912	Unknown protein
Solyc01g060250	1.01712	1.60703	2.23938	1.83553	1.65513	3.63564	4.55202	5.82425	Unknown protein
Solyc01g060260	0.0276913	0.0705647	0.120824	0	0.618258	0.191305	0.044975	0.0354797	Glycine-rich protein family (AHRD V3.3 *-* AT5G49350.2)
Solyc01g060270	0	0	0.116807	0	1.15046	0.769435	0.006361	0.0141543	Protein trichome birefringence (AHRD V3.3 *** A0A2G3BHS7_CAPCH)
Solyc01g060280	6.9286	7.09949	7.67499	9.1735	11.4097	12.1445	11.2093	12.8625	AMSH-like ubiquitin thioesterase 1 (AHRD V3.3 *** A0A2G2XPY5_CAPBA)
Solyc01g060310	0	0	0	0	0	0	0	0	MADS-box transcription factor (AHRD V3.3 *-* A0A2K3MRY7_TRIPR)
Solyc01g060340	0	0	0	0	0	0	0	0	Endoglucanase (AHRD V3.3 *-* A0A328DEK8_9ASTE)
Solyc01g060350	0	0	0	0	0	0	0	0	Unknown protein
Solyc01g060370	0	0	0	0	0	0	0	0	DNA-binding pseudobarrel domain-containing protein (AHRD V3.3 *** A0A2U1N862_ARTAN)
Solyc01g060375	0	0	0	0	0	0	0	0	Unknown protein
Solyc01g060390	0	0	0	0	0	0	0	0	UQ_con domain-containing protein (AHRD V3.3 *-* A0A1Q3CAP2_CEPFO)
Solyc01g060395	0.191333	0.355427	0.500286	0.375015	0.0435243	0.582532	1.10088	1.92325	Unknown protein
Solyc01g060410	4.61141	4.7765	7.27203	3.93376	2.18129	8.29385	19.1573	18.4801	GPI-anchored adhesin-like protein (AHRD V3.3 *** Q9M2F2_ARATH)
Solyc01g060420	0.880093	1.85781	1.43198	0.214274	0	0.361658	7.87211	7.28726	Zinc finger protein 8 (AHRD V3.3 *** A0A2G2XR52_CAPBA)
Solyc01g060430	0	0	0	0	0	0	0	0	B-cell receptor-associated protein 31-like protein (AHRD V3.3 --* AT5G48660.1)
Solyc01g060450	2.30702	2.6956	1.73615	3.2976	0.285957	1.44435	1.28696	1.29906	transmembrane protein%2C putative (DUF1218) (AHRD V3.3 *** AT5G49320.1)
Solyc01g060460	0.115299	0.0225737	0.148259	0.074848	1.17157	0.216064	0.273494	0.338702	SNF2-related (AHRD V3.3 *** A0A200QQJ8_9MAGN)
Solyc01g060470	51.7537	54.2284	59.0879	60.272	59.4033	65.2859	82.3457	81.5441	Importin subunit alpha (AHRD V3.3 *** A0A2G3DFJ0_CAPCH)
Solyc01g060490	0.419967	0.127705	0.42941	0.562797	0.411152	0.597935	0.484767	0.366219	GATA transcription factor 23 (AHRD V3.3 *** A0A2G2VJP8_CAPBA)
Solyc01g065490	6.7446	6.20319	4.04635	3.81864	4.53702	5.2036	7.74441	6.50466	NAD(P)-linked oxidoreductase, aldo/keto reductase family protein (AHRD V3.3 *** A0A1Y1HY98_KLENI)
Solyc01g065500	5.55939	5.26677	6.59122	8.26789	6.76547	5.07516	4.90614	6.47713	C2 calcium/lipid-binding plant phosphoribosyltransferase family protein (AHRD V3.3 *** A0A061EZM2_THECC)
Solyc01g065510	86.472	77.9205	105.808	126.324	76.3754	93.4912	114.765	125.487	leucine-rich repeat extensin-like protein 6 (AHRD V3.3 *-* XP_010321602.1)
Solyc01g065530	34.8655	33.6129	23.1593	32.7224	23.9588	30.6472	37.9789	47.2452	COBRA-like protein (AHRD V3.3 *** A0A2G3AIT3_CAPAN)
Solyc01g065540	3.07723	3.41268	5.71306	6.09143	6.31476	10.0213	11.2784	12.6566	Two-component response regulator (AHRD V3.3 *** A0A2G3DGB4_CAPCH)
Solyc01g065545	0	0.0105513	0.011984	0	0	0.008186	0.00751733	0.00297233	Retrovirus-related Pol polyprotein from transposon TNT 1-94 (AHRD V3.3 *-* A0A2K3NBQ9_TRIPR)
Solyc01g065550	13.6291	16.0585	12.252	13.6485	19.4352	21.1646	16.1592	17.9946	Dehydration-induced 19-like protein (AHRD V3.3 *** E3T7S4_GOSHI)
Solyc01g065560	3.41715	3.99559	4.40435	4.85279	7.29595	9.29366	8.78938	10.2678	DUF789 domain-containing protein (AHRD V3.3 *** A0A1Q3DF52_CEPFO)
Solyc01g065570	0.678461	0.720081	0.255801	0.633051	0.472384	0.183615	0.0646687	0.12574	DnaJ domain-containing protein (AHRD V3.3 *** A0A1Q3B8J9_CEPFO)
Solyc01g065580	14.6631	15.775	17.9246	16.1156	20.3231	26.0959	34.0538	33.5207	Pumilio-like protein 24 (AHRD V3.3 *** A0A2G2XR42_CAPBA)
Solyc01g065585	0	0	0	0	0	0	0	0	NAD(P)H-quinone oxidoreductase chain 4, chloroplastic (AHRD V3.3 *-* A0A1U8QCJ1_CAPAN)
Solyc01g065610	0	0	0	0	0	0	0	0	NAD(P)H-quinone oxidoreductase chain 4, chloroplastic (AHRD V3.3 *-* A0A1U8QCJ1_CAPAN)
Solyc01g065620	0	0	0	0	0	0	0	0	NAD(P)H-quinone oxidoreductase chain 4, chloroplastic (AHRD V3.3 *-* A0A1U8QCJ1_CAPAN)
Solyc01g065625	0	0	0	0	0	0	0	0	Retrovirus-related Pol polyprotein from transposon TNT 1-94 (AHRD V3.3 *-* A0A2K3MQM8_TRIPR)
Solyc01g065630	0	0	0	0	0	0	0	0	NAD(P)H-quinone oxidoreductase chain 4, chloroplastic (AHRD V3.3 *-* U6EJ31_LINPH)
Solyc01g065640	0	0	0	0	0	0	0.067225	0.137703	NAD(P)H-quinone oxidoreductase chain 4, chloroplastic (AHRD V3.3 *-* A0A1U8QCJ1_CAPAN)
Solyc01g065643	0	0	0	0	0	0	0.0203193	0.020882	WD repeat-containing protein 43 (AHRD V3.3 --* XP_004231570.1)
Solyc01g065647	0	0	0	0	0	0.00991233	0	0	WD repeat-containing protein 43 (AHRD V3.3 *-* XP_004231570.1)
Solyc01g065650	0	0	0	0	0	0	0	0	Transducin/WD40 repeat-like superfamily protein (AHRD V3.3 *-* F4K6D8_ARATH)
Solyc01g065660	0	0	0	0	0	0	0	0	Transducin/WD40 repeat-like superfamily protein (AHRD V3.3 --* AT3G13340.3)
Solyc01g065670	0	0	0	0	0	0	0	0	Transducin/WD40 repeat-like superfamily protein (AHRD V3.3 *-* A0A1P8BF16_ARATH)
Solyc01g065680	2.2436	2.60047	2.64993	3.54205	2.87537	7.57643	10.5086	16.7634	Unknown protein
Solyc01g065690	7.86377	8.74698	7.5424	8.27691	2.60899	4.9338	6.28904	8.07008	Heavy metal-associated isoprenylated plant protein (AHRD V3.3 *-* A0A2R6PJM0_ACTCH)
Solyc01g065700	0.906927	0.689956	0.085001	0.0502413	0.0405663	0.0758393	0.036044	0.0268123	Protein phosphatase 2C family protein (AHRD V3.3 *** A0A2U1N538_ARTAN)
Solyc01g065710	8.36311	8.61779	11.3509	12.5138	8.64354	13.5506	14.6563	12.326	CST complex subunit TEN1 (AHRD V3.3 *** A0A2G3AIU0_CAPAN)
Solyc01g065720	3.84206	3.90954	3.66451	3.79885	10.6818	6.55752	6.67421	7.62181	Phospholipase (AHRD V3.3 *** A0A2I4F1X9_9ROSI)
Solyc01g065725	0	0	0	0	0	0	0	0	Unknown protein
Solyc01g065740	0.608457	0.534491	0.96041	0.849694	2.22777	2.79043	3.74649	3.7054	F-box/RNI-like superfamily protein (AHRD V3.3 *** F4KDV0_ARATH)
Solyc01g065750	6.44651	9.43828	1.61086	3.14479	3.70727	4.77646	3.07874	3.57541	Unknown protein
Solyc01g065810	0	0.001517	0	0.182644	0	0.0982277	0.031719	0.099309	NADH dehydrogenase subunit 7 (AHRD V3.3 *-* A0A1B3IYY1_9LILI)
Solyc01g065840	5.7043	6.80931	7.19517	6.79634	10.3855	13.3799	16.5729	18.5508	F-box/RNI-like superfamily protein (AHRD V3.3 *** A0A178U7Y7_ARATH)
Solyc01g065845	0.0134837	0.20516	0	0	0.035506	0	0	0	Unknown protein
Solyc01g065900	0	0	0	0	0.016444	0	0	0	trihelix transcription factor ASR3-like (AHRD V3.3 *** A0A2I4FCD1_9ROSI)
Solyc01g065903	0	0	0	0	0	0	0	0	protein PELPK1-like (AHRD V3.3 *-* XP_019068397.1)
Solyc01g065907	0	0	0	0	0	0	0	0	protein PELPK1-like (AHRD V3.3 *** XP_019068397.1)
Solyc01g065910	0	0	0	0	5.58894	1.11229	0.00533233	0	Nucleoporin autopeptidase (AHRD V3.3 *-* AT1G10390.3)
Solyc01g065930	0	0	0	0	0	0	0	0	Unknown protein
Solyc01g065960	0	0	0	0	0	0	0	0	gamma-interferon-responsive lysosomal thiol protein (AHRD V3.3 *-* XP_004240418.1)
Solyc01g065970	0	0	0	0	0.056355	0	0	0	Unknown protein
Solyc01g065980	47.8958	52.4776	43.0448	36.3185	54.7155	46.8536	131.927	137.469	Ethylene Response Factor E.4
Solyc01g065983	0.216814	0.278917	0.192363	0	0.334206	0.1031	0.576563	0.464761	Zinc finger CCCH domain-containing protein 53-like (AHRD V3.3 *-* A0A2K3PKI8_TRIPR)
Solyc01g065987	0.00194467	0.0241603	0	0	0.420483	0	0.00504733	0	Retrovirus-related Pol polyprotein from transposon TNT 1-94 (AHRD V3.3 *-* A0A2K3MN99_TRIPR)
Solyc01g066020	0.090433	0.091739	0.586335	0.0771153	4.01858	0.377003	0.0147403	0	Disease resistance protein (TIR-NBS-LRR class) (AHRD V3.3 *** A0A2U1PW75_ARTAN)
Solyc01g066040	1.19265	3.88917	0.208994	0.59897	0.0614287	2.85825	0.136716	1.36454	Unknown protein
Solyc01g066050	24.3436	22.9586	29.8491	30.5417	41.7669	36.7696	39.6659	43.2753	Tetratricopeptide repeat-containing domain (AHRD V3.3 *** A0A200PWL4_9MAGN)
Solyc01g066055	0	0	0	0	0	0	0	0	Polyprotein (AHRD V3.3 *-* Q9ZS84_SOLLC)
Solyc01g066060	9.05805	10.2967	13.0516	14.7776	14.2204	22.2854	23.2834	25.3681	Multiple organellar RNA editing factor 3, mitochondrial (AHRD V3.3 *** A0A2G3AIV4_CAPAN)
Solyc01g066065	0	0	0	0	0.0155293	0	0	0	Retrovirus-related Pol polyprotein from transposon TNT 1-94 (AHRD V3.3 *-* A0A2K3MQ97_TRIPR)
Solyc01g066070	0.0784907	0.0240467	0.029114	0.0107913	0.355678	0.0626353	0	0.0108623	Pectin lyase-like superfamily protein (AHRD V3.3 *** F4JQS2_ARATH)
Solyc01g066080	0	0	0.0357643	0	0	0	0	0	Glycosyltransferase (AHRD V3.3 *-* A0A2I4GJH4_9ROSI)
Solyc01g066090	0	0	0	0	0	0	0	0	Glycosyltransferase (AHRD V3.3 *-* A0A2I4DPZ1_9ROSI)
Solyc01g066100	0	0	0	0	0	0	0	0	Glycosyltransferase (AHRD V3.3 *** A0A2I4GJH4_9ROSI)
Solyc01g066110	0	0	0	0	0	0	0	0	Glycosyltransferase (AHRD V3.3 *** A0A2I4GJH4_9ROSI)
Solyc01g066115	0	0	0	0	0	0	0	0	Glycosyltransferase (AHRD V3.3 *-* A0A218XG81_PUNGR)
Solyc01g066120	0	0	0	0	0	0	0	0.069163	Glycosyltransferase (AHRD V3.3 *-* A0A2I4GJH4_9ROSI)
Solyc01g066130	0	0	0	0	0	0	0	0	crocetin glucosyltransferase, chloroplastic-like (AHRD V3.3 *-* XP_004229323.3)
Solyc01g066140	0	0	0	0	0	0	0	0	Glycosyltransferase (AHRD V3.3 *** A0A1Q3BPF3_CEPFO)
Solyc01g066145	0	0	0	0	0.15357	0	0.019213	0	Glycosyltransferase (AHRD V3.3 *-* A0A2I4GJH4_9ROSI)
Solyc01g066150	0	0	0	0.023036	0.0922917	0	0.0366267	0.0396633	Glycosyltransferase (AHRD V3.3 *-* A0A2I4GJH4_9ROSI)
Solyc01g066160	0.23097	0.108714	0	0.270496	0	1.58321	0.0419133	0.161981	Unknown protein
Solyc01g066190	0.0948607	0.0217443	0.104961	0.0606803	0.056709	0	0	0	Unknown protein
Solyc01g066200	1.64832	3.63173	0.75513	1.50177	0.0668163	0.770401	0.048655	0.077306	Unknown protein
Solyc01g066205	0	0	0	0	0.038987	0	0	0	Retrovirus-related Pol polyprotein from transposon TNT 1-94 (AHRD V3.3 *-* A0A2K3NZR4_TRIPR)
Solyc01g066210	0	0	0	0	0	0	0	0	Unknown protein
Solyc01g066230	0	0	0.15279	0	0.389498	0.0493617	0	0	Unknown protein
Solyc01g066235	0	0	0	0	0.0601127	0.137795	0	0	Unknown protein
Solyc01g066260	0.023416	0	0.0633463	0.132527	0.226211	1.05513	0.0603427	0.122817	Unknown protein
Solyc01g066270	0.608285	1.20989	0.198496	0.490671	0	0	0.063351	0.101106	Unknown protein
Solyc01g066280	0	0	0	0	0	0.026614	0.0285767	0	Unknown protein
Solyc01g066290	0.546193	1.23115	1.18642	0.619293	0.773949	0.301057	0.220084	0.124875	Unknown protein
Solyc01g066293	0	0	0	0	0	0	0	0	Unknown protein
Solyc01g066297	0	0	0	0	0	0	0	0	zinc finger BED domain-containing protein RICESLEEPER 4-like (AHRD V3.3 *-* XP_010319895.2)
Solyc01g066310	14.8441	15.2347	8.65174	9.99311	12.1531	11.7634	16.8312	18.102	Acyl-CoA dehydrogenase family member 10 (AHRD V3.3 *** A0A1J3CLI6_NOCCA)
Solyc01g066320	0	0	0	0	0	0	0	0	Unknown protein
Solyc01g066330	0	0	0	0	0	0	0	0	Unknown protein
Solyc01g066340	5.31286	6.39834	7.34771	7.05985	9.88442	8.96889	9.43002	12.9363	Unknown protein
Solyc01g066345	0	0	0	0	0	0	0	0	Retrovirus-related Pol polyprotein from transposon TNT 1-94 (AHRD V3.3 *-* A0A2I0VNR7_9ASPA)
Solyc01g066350	0.0253633	0	0	0	0	0	0.042563	0	Unknown protein
Solyc01g066360	0.210971	0.148111	0.244018	0.0788203	1.1784	0.098767	0	0.0141353	Pectinesterase (AHRD V3.3 *** A0A2G3DFT1_CAPCH)
Solyc01g066380	0.455167	0.425853	0.978938	0.220729	1.84128	0.243131	0.0174093	0.023895	Unknown protein
Solyc01g066390	0.0282147	0.09489	0.0474657	0	0.0992003	0.0212163	0	0.00983967	Pectinesterase (AHRD V3.3 *-* A0A2G3DFP5_CAPCH)
Solyc01g066410	0	0	0	0	0	0	0	0	Pectinesterase (AHRD V3.3 *-* A0A2G3DFP5_CAPCH)
Solyc01g066420	0.617898	0.317391	1.22821	0.277702	15.6321	0.36651	0	0.01455	Pectinesterase (AHRD V3.3 *** A0A2G2XPD2_CAPBA)
Solyc01g066425	0	0	0	0	0	0	0	0	Pectinesterase (AHRD V3.3 *-* A0A2G3DFP5_CAPCH)
Solyc01g066430	66.2995	64.2089	29.8695	46.0625	17.2394	28.0957	32.3437	41.4719	RING-H2 finger protein ATL2-like (AHRD V3.3 *** A0A2I4E8K9_9ROSI)
Solyc01g066440	31.2708	45.626	50.0004	67.6115	11.0437	43.017	25.4805	28.331	hypothetical protein (AHRD V3.3 *** AT3G06840.1)
Solyc01g066445	0	0	0	0	0	0	0	0	Retrovirus-related Pol polyprotein from transposon TNT 1-94 (AHRD V3.3 *-* A0A2K3MN99_TRIPR)
Solyc01g066450	1.2927	2.41144	3.127	2.09609	16.1796	3.57035	4.93738	6.209	Alpha/beta-Hydrolases superfamily protein (AHRD V3.3 *** A0A2U1Q133_ARTAN)
Solyc01g066455	0	0.047573	0.335448	0.17901	0.304672	0.343059	0.616278	0.636128	Fumarylacetoacetate (FAA) hydrolase family (AHRD V3.3 --* AT3G16700.1)
Solyc01g066457	4.20838	4.33373	3.70464	3.11826	68.9807	14.094	1.4746	1.47634	Alpha/beta-Hydrolases superfamily protein (AHRD V3.3 *** A0A2U1MWY4_ARTAN)
Solyc01g066480	28.609	31.8359	22.5066	29.6999	24.1702	27.0319	22.4569	21.2885	Fumarylacetoacetate hydrolase family (AHRD V3.3 *** A0A1Y1HN88_KLENI)
Solyc01g066490	3.78843	3.06694	1.55232	1.40507	1.98243	2.97521	4.45001	3.63429	Unknown protein
Solyc01g066500	0.381324	0.43784	0.730628	0.612727	1.03016	1.0757	0.550661	0.589622	Transcription factor, MADS-box (AHRD V3.3 *-* A0A2U1QC70_ARTAN)
Solyc01g066510	0.0454283	0.0548067	0.0144977	0.009152	0.519669	0.202395	0.083278	0.152628	Protein GAMETE EXPRESSED 2 (AHRD V3.3 *** A0A2G3AJS1_CAPAN)
Solyc01g066520	9.79998	10.7258	9.23885	9.71515	18.481	16.7359	14.679	17.8105	Dihydrolipoamide acetyltransferase component of pyruvate dehydrogenase complex (AHRD V3.3 *** A0A024B875_SOLTU)
Solyc01g066560	0.144703	0.157821	0.621987	0.399869	2.41937	0.89483	5.30183	5.73649	Protein DETOXIFICATION (AHRD V3.3 *** A0A2G3DGJ0_CAPCH)
Solyc01g066570	2.53938	5.86305	17.194	5.23229	2.35111	154.048	113.686	138.405	FCS-Like Zinc finger 15 (AHRD V3.3 *-* FLZ15_ARATH)
Solyc01g066575	0	0	0	0	0.0231017	0	0	0	Retrovirus-related Pol polyprotein from transposon TNT 1-94 (AHRD V3.3 *-* A0A2K3MQ97_TRIPR)
Solyc01g066590	54.2737	60.2003	55.0789	63.4688	30.3624	64.1864	65.5741	62.0244	Dynein light chain (AHRD V3.3 *** A0A2G3DI71_CAPCH)
Solyc01g066610	0.817607	0.782963	1.32079	0.692182	0.941931	1.5199	2.93339	3.66645	Fanconi anemia group I protein (AHRD V3.3 *** A0A2I4F1R6_9ROSI)
Solyc01g066612	0.0278023	0	0	0	0	0	0	0	ATP-dependent DNA helicase (AHRD V3.3 *-* A0A2G3C774_CAPCH)
Solyc01g066614	0	0	0	0	0	0	0	0	Guanylate-binding family protein (AHRD V3.3 *-* A0A2U1PP48_ARTAN)
Solyc01g066616	0	0	0	0	0	0	0	0	replication protein A 70 kDa DNA-binding subunit B-like (AHRD V3.3 *** A0A2I4FHD9_9ROSI)
Solyc01g066618	0	0	0	0	0	0	0	0	Unknown protein
Solyc01g066620	0.861396	0.871487	3.58124	0.870479	237.54	6.83182	1.23636	1.30667	Glyoxysomal fatty acid beta-oxidation multifunctional protein MFP-a (AHRD V3.3 *** A0A2G3AJZ7_CAPAN)
Solyc01g066625	0	0.00258	0.00120867	0.00123667	0.0149213	0.00100233	0	0	protein FAR1-RELATED SEQUENCE 5-like (AHRD V3.3 *** A0A2I4FDV7_9ROSI)
Solyc01g066630	0	0	0	0	0	0	0.0821143	0	Unknown protein
Solyc01g066640	35.4151	27.9718	74.1355	78.6261	4.83509	33.5119	47.4652	44.0588	Vitellogenin-like protein (AHRD V3.3 *-* Q9FH24_ARATH)
Solyc01g066650	0	0	0	0	0	0	0	0	protein FAR1-RELATED SEQUENCE 5-like (AHRD V3.3 *-* A0A2I4GCM5_9ROSI)
Solyc01g066660	0	0	0	0	0	0	0	0	protein FAR1-RELATED SEQUENCE 5-like (AHRD V3.3 *-* A0A2I4FDV7_9ROSI)
Solyc01g066670	0	0	0	0	0	0	0	0	protein FAR1-RELATED SEQUENCE 5-like (AHRD V3.3 *-* A0A2I4FDV7_9ROSI)
Solyc01g066680	262.26	337.901	0.200311	0.627748	0.354742	0.775984	0	0	Pollen Ole e 1 allergen and extensin family protein (AHRD V3.3 *** A0A2U1NI15_ARTAN)
Solyc01g066690	16.8536	18.3339	19.4873	17.5364	17.7311	22.4852	22.4418	21.539	Eukaryotic translation initiation factor 2 subunit 3 (AHRD V3.3 *** A0A1U8HGG1_CAPAN)
Solyc01g066700	0.691359	0.538541	0.375742	0.1768	17.6073	3.4886	0.425064	0.495016	UDP-glucuronic acid decarboxylase (AHRD V3.3 *** G5DXR5_SILLA)
Solyc01g066710	0.121679	0	0.101049	0.025396	7.56161	1.01237	0.103054	0.218944	UDP-glucuronic acid decarboxylase 4 (AHRD V3.3 *-* A0A2G2VJP5_CAPBA)
Solyc01g066720	68.6781	72.003	118.558	117.132	101.705	120.235	116.163	90.0839	Hypoxia-responsive family protein (AHRD V3.3 *** S8D7L7_9LAMI)
Solyc01g066730	1.18041	1.01082	1.7588	1.17541	4.39669	2.1131	2.08282	2.21767	Transcription factor, MADS-box (AHRD V3.3 *-* A0A2U1LSQ9_ARTAN)
Solyc01g066740	22.1125	15.9896	19.2026	24.2612	6.53733	17.2507	27.145	29.5135	Transducin/WD40 repeat-like superfamily protein (AHRD V3.3 *-* A0A2U1LEC3_ARTAN)
Solyc01g066750	0	0	0	0	0	0	0	0	Unknown protein
Solyc01g066760	50.2138	52.0164	62.7566	79.4235	39.982	79.4875	51.8268	59.8267	Unknown protein
Solyc01g066770	6.30915	6.62233	4.529	3.52096	11.051	8.51626	8.20884	9.50209	Chaperone protein dnaJ 49 (AHRD V3.3 *** A0A2G3B5J1_CAPCH)
Solyc01g066775	0.0426	0	0	0	0.0552203	0	0	0	Histone-lysine N-methyltransferase ATXR2 (AHRD V3.3 *-* A0A2G2Z378_CAPAN)
Solyc01g066790	0.182912	0.395196	0	0.261013	0	0.0691287	0	0	Unknown protein
Solyc01g066800	0	0	0	0	0	0	0	0	Actin (AHRD V3.3 *-* B1NJ25_OPUST)
Solyc01g066810	0.844667	0.348148	1.86495	0.381349	33.6566	1.56281	0.094815	0.03878	Adenine nucleotide alpha hydrolases-like superfamily protein (AHRD V3.3 *** O82240_ARATH)
Solyc01g066820	0.606978	0.584899	0.804266	0.6403	3.86084	2.44011	3.26807	4.04354	Kinesin-like protein (AHRD V3.3 *** A0A2G3CJ78_CAPCH)
Solyc01g066830	5.19651	5.32832	5.75717	5.59574	7.91699	8.90783	10.3869	11.8594	Ubiquitin-like-specific protease ESD4 (AHRD V3.3 *** A0A1U8EF37_CAPAN)
Solyc01g066840	425.985	449.598	580.272	504.055	474.898	625.406	543.328	431.721	40S ribosomal protein S21 (AHRD V3.3 *** A0A1U8E7W4_CAPAN)
Solyc01g066850	0.657649	0.34568	0.562209	0.0673573	0	0.159863	2.22436	1.65112	WAT1-related protein (AHRD V3.3 *** K4AWT5_SOLLC)
Solyc01g066860	53.2446	75.3701	54.7983	81.59	13.38	30.2922	19.9121	24.3304	hypothetical protein (AHRD V3.3 *** AT1G63310.1)
Solyc01g066870	7.95972	7.68632	5.01217	6.5183	4.07524	5.84901	5.82447	6.75061	Protein phosphatase 2C (AHRD V3.3 *** A0A2U1QFI0_ARTAN)
Solyc01g066880	13.4979	15.9377	13.5837	16.814	6.99345	9.89473	8.6791	7.39164	heavy metal-associated isoprenylated plant protein 3-like (AHRD V3.3 *** A0A2G3ALM1_CAPAN)
Solyc01g066890	0	0	0	0	0	0	0	0	Kinesin-4 (AHRD V3.3 *-* A0A2G3CDB4_CAPCH)
Solyc01g066895	0	0	0	0	0	0	0	0	Unknown protein
Solyc01g066900	11.5447	11.2521	13.9388	13.2218	6.02873	13.397	18.6027	15.542	uveal autoantigen with coiled-coil/ankyrin (AHRD V3.3 *** AT4G15790.1)
Solyc01g066905	0	0	0	0	0	0	0	0	Retrovirus-related Pol polyprotein from transposon TNT 1-94 (AHRD V3.3 *-* A0A2I0VJ33_9ASPA)
Solyc01g066910	14.5803	1.99739	67.7549	16.9228	10.2105	14.2607	64.3815	19.6797	Bifunctional inhibitor/plant lipid transfer protein/seed storage helical domain containing protein (AHRD V3.3 *** A0A2P5CY45_TREOI)
Solyc01g066915	0.0266327	0.0124563	0	0	0.0339217	0	0	0	Bifunctional nitrilase/nitrile hydratase NIT4B (AHRD V3.3 *-* A0A2G2VPR2_CAPBA)
Solyc01g066940	7.25288	7.47082	9.25551	10.2301	6.97968	8.39187	10.6822	10.3208	Vesicle-associated membrane protein (AHRD V3.3 *** A0A1U8E616_CAPAN)
Solyc01g066950	0.0272843	0	0	0	0.102134	0	0	0	Flowering-promoting factor 1 (AHRD V3.3 *** A0A1U8FE64_CAPAN)
Solyc01g066970	0.0262853	0.170535	3.69065	5.3973	0.397498	4.50558	11.2124	3.39484	Flowering-promoting factor 1 (AHRD V3.3 *** A0A1U8FE64_CAPAN)
Solyc01g066980	2.48799	3.1985	0.116416	0.546979	0.182367	2.05071	0.147318	0.494326	Flowering-promoting factor 1 (AHRD V3.3 *** A0A1U8FMN5_CAPAN)
Solyc01g066990	0.30972	0.256589	0.422414	0.358446	1.0473	0.542337	2.53711	2.67003	Unknown protein
Solyc01g067000	18.7731	23.2507	9.6959	15.017	14.362	14.9593	8.45568	13.2763	Calcium-dependent lipid-binding (CaLB domain) family protein (AHRD V3.3 *-* F4JK83_ARATH)
Solyc01g067005	0	0	0.0826543	0.0201103	1.66017	0.491135	0.0337463	0	Unknown protein
Solyc01g067010	6.70367	6.17584	3.72776	3.72879	8.67444	5.50257	4.35813	5.28023	F-box protein (AHRD V3.3 *** A0A2K3P6V3_TRIPR)
Solyc01g067020	0.730096	0.609793	23.2047	0.0686323	37.5297	3.18167	0.063059	0.143396	Atypical receptor-like kinase 1 (AHRD V3.3 *** C5H8K0_SOLLC)
Solyc01g067030	1.1521	0.702444	1.41074	1.0905	2.42601	2.11023	2.22864	3.27545	F-box protein (AHRD V3.3 *** A0A2K3P6V3_TRIPR)
Solyc01g067040	1.66735	1.88502	4.65674	5.10924	2.65193	9.15028	9.44814	10.4052	Tudor/PWWP/MBT superfamily protein (AHRD V3.3 *-* A0A1I9LQQ5_ARATH)
Solyc01g067045	0	0	0	0	0	0	0	0	Retrovirus-related Pol polyprotein from transposon TNT 1-94 (AHRD V3.3 *-* A0A2K3MS94_TRIPR)
Solyc01g067070	15.9889	16.8533	12.2499	14.8335	12.9792	11.7307	15.1138	14.8541	Mitochondrial carrier protein (AHRD V3.3 *** A0A200QX10_9MAGN)
Solyc01g067080	6.97359	8.53341	9.21792	9.73736	10.9451	13.6441	11.3453	10.9007	dynein beta chain%2C ciliary protein (AHRD V3.3 *** AT3G21400.1)
Solyc01g067090	2.17957	2.03738	4.14716	3.28266	7.03338	6.0753	7.8574	9.56576	Arginine-glutamic acid dipeptide repeat protein (AHRD V3.3 *-* Q8GZA1_ARATH)
Solyc01g067100	23.3713	24.9234	25.2966	29.8727	42.8487	37.3033	39.2137	47.0166	Cullin (AHRD V3.3 *** A0A200Q1J8_9MAGN)
Solyc01g067120	2.95288	2.4981	0.0638727	0.342206	0.197842	0.742468	0.445792	0.86024	cullin-1-like (AHRD V3.3 *-* A0A2I4G9U1_9ROSI)
Solyc01g067130	0.635605	0.786221	0.566782	0.674834	0.259393	0.306719	1.04064	1.27701	Nuclear transcription factor Y subunit B (AHRD V3.3 *** A0A2G2X323_CAPBA)
Solyc01g067140	0	0	0	0	0	0	0	0	Cullin (AHRD V3.3 *** A0A200Q1J8_9MAGN)
Solyc01g067145	0	0	0	0	0	0	0	0	GDSL esterase/lipase EXL3 (AHRD V3.3 *-* A0A2G3CQL4_CAPCH)
Solyc01g067150	0	0	0	0	0	0	0	0	LOW QUALITY PROTEIN: probable disease resistance protein (AHRD V3.3 *-* XP_025884568.1)
Solyc01g067160	1.17298	1.36501	1.63125	1.49013	1.45005	3.25354	5.31118	5.48563	AAA+ ATPase domain-containing protein (AHRD V3.3 *-* A0A2U1KZ76_ARTAN)
Solyc01g067170	0	0.024474	0	0	0.134651	0	0.050514	0.097599	Cullin (AHRD V3.3 *-* A0A200Q1J8_9MAGN)
Solyc01g067173	0	0	0	0	0	0	0	0	Retrovirus-related Pol polyprotein from transposon TNT 1-94 (AHRD V3.3 *-* A0A2U1PV21_ARTAN)
Solyc01g067177	0.058503	0.0681897	0.0105513	0.0853493	0.0757847	0.088309	0.0625767	0.0848077	Unknown protein
Solyc01g067190	0.064868	0.0213223	0.0198163	0	0.119965	0.075991	0.242731	0.24306	Photosystem II CP43 reaction center protein (AHRD V3.3 *-* A0A2G2ZET2_CAPAN)
Solyc01g067200	0.0622817	0.0743137	0.0277707	0.04415	0.056596	0.0817253	0.242278	0.395616	Cullin 1 (AHRD V3.3 *-* A0A1J1EDP0_PETHY)
Solyc01g067210	0.304902	0.242437	0.148451	0.124182	0.405191	0.386983	0.849817	1.09685	Cullin (AHRD V3.3 *-* A0A200Q1J8_9MAGN)
Solyc01g067220	0.261	0.279079	0.316133	0.284172	0.387228	0.310086	0.638991	1.10108	Unknown protein
Solyc01g067230	0.654474	0.125207	0.151217	0.100465	0.658194	0.942049	1.16847	1.38702	Cullin 1 (AHRD V3.3 *-* A0A1J1EDP0_PETHY)
Solyc01g067250	1.53753	1.53731	0.821501	0.605346	1.8644	1.93285	3.29618	2.92804	Cullin 1 (AHRD V3.3 *-* A0A1J1EDP0_PETHY)
Solyc01g067255	0.166394	0.479315	0.267748	0.0727953	0.377407	0.154487	0.362872	0.664255	Retrovirus-related Pol polyprotein from transposon TNT 1-94 (AHRD V3.3 *-* A0A2I0VJ33_9ASPA)
Solyc01g067270	2.83708	2.79362	1.7821	1.40839	4.16973	3.37965	5.23207	5.64648	Cullin (AHRD V3.3 *-* A0A200Q1J8_9MAGN)
Solyc01g067280	10.3071	12.1474	11.5306	14.0298	24.0457	14.8152	11.5511	12.1418	F-box-like protein (AHRD V3.3 *** AT4G15563.9)
Solyc01g067290	77.1709	82.7133	30.0287	35.3897	13.07	18.267	23.6226	23.9169	Divinyl chlorophyllide a 8-vinyl-reductase, chloroplastic (AHRD V3.3 *** A0A2G2XQY6_CAPBA)
Solyc01g067295	970.914	1185.28	353.715	876.875	8.75689	39.3744	17.8282	27.4499	Fruit-specific protein (AHRD V3.3 *** A0A2G2VKF4_CAPBA)
Solyc01g067300	0.530253	0.377473	0.182835	0.118244	2.31043	0.386558	0.128328	0.240831	CASP-like protein (AHRD V3.3 *-* A0A0K9RZ96_SPIOL)
Solyc01g067320	0	0	0	0	0	0	0	0	Receptor-like protein kinase (AHRD V3.3 *-* A0A2K3NZ00_TRIPR)
[truncated: 32,078 more rows]

## Sheet: Table S6
Table S6 Differentially expressed genes in WT-30 versus ms-30 in sepals
	FPKM
GeneID	SE_WT-30	SE_ms-30	PE_WT-30	PE_ms-30	ST_WT-30	ST_ms-30	CA_WT-30	CA_ms-30	log2FoldChange(WT-30/ms-30)	padj
Solyc00g500057	0.20222	0	0	0.00239333	0.0398817	0	0	0	-7.32795	0.000166543
Solyc00g500139	0.1223	0	0	0.00276067	0.043407	0	0	0	-6.41764	0.0185235
Solyc00g500209	0.230891	0	0	0.00239333	0.0398817	0	0	0	-7.51582	5.45e-05
Solyc01g005780	0.125268	0.482103	0.0764037	0.226855	0.0877757	0.069855	0.077404	0.131183	1.90745	0.0156293
Solyc01g066040	1.19265	3.88917	0.208994	0.59897	0.0614287	2.85825	0.136716	1.36454	1.66602	0.0135245
Solyc01g079180	12.6495	4.95462	14.2866	3.75608	19.8798	7.45071	0.526989	0.353172	-1.4137	0.0169505
Solyc01g095960	3.66194	1.51125	2.67388	1.38257	0.536134	4.07273	7.89839	5.7392	-1.32475	0.00942151
Solyc01g096750	0.00584133	0.204869	15.5519	0.2636	4.61402	36.8251	107.645	101.906	4.83502	0.0162481
Solyc01g102960	15.6129	3.31275	38.6705	9.00106	24.7953	3.55387	33.2426	5.12353	-2.26112	2.33e-16
Solyc01g104620	1.58723	4.57827	2.60065	4.33197	23.4643	6.92128	2.48237	4.16785	1.50829	0.0132401
Solyc01g104740	45.2339	14.8331	56.9218	15.9208	57.7806	15.312	44.9479	9.17756	-1.65205	2.64e-06
Solyc01g105383	14.44	0	6.14718	4.99772	7.95848	15.7469	16.8408	7.42059	-12.5897	1.27e-21
Solyc02g024010	4.25465	9.0357	5.40881	7.10759	5.89311	5.9269	3.32186	3.0775	1.07326	0.0015824
Solyc02g061780	0.313018	1.30166	0.40558	0	0.238085	0.102345	1.70541	3.29616	2.01244	0.00366077
Solyc02g069800	9.86679	22.0083	42.2539	52.2341	59.497	51.3681	20.4992	25.3791	1.14558	0.0162311
Solyc02g071700	104.654	47.0238	77.9558	42.6204	1.23424	11.5687	13.8359	10.9591	-1.16355	5.34e-05
Solyc02g077590	24.176	58.6019	0.216064	0.990107	0	0.13696	0.117561	0.544124	1.24886	0.0253201
Solyc02g078870	7.90048	18.1868	2.96609	3.57557	2.52344	3.65481	5.56748	6.63344	1.1988	0.0136875
Solyc02g080120	3.67841	7.96516	0.0918853	0.577622	0.223512	0.0791817	0.164139	0.181009	1.11477
Solyc02g083000	1.1013	5.04422	0.779079	4.35084	0.711847	4.49351	1.28266	5.2202	2.14443	0.0266326
Solyc02g083120	5.07856	12.151	2.24181	4.3897	0.430235	2.93529	1.18773	2.55198	1.21754	0.00509237
Solyc02g085630	6.44226	25.8599	1.23411	12.3252	0.626477	27.532	1.20541	13.3909	1.9783	7.32e-15
Solyc02g089610	70.6586	32.7356	39.7074	24.3162	149.124	59.2369	79.264	49.5752	-1.15881	0.0321612
Solyc02g089620	63.6367	25.8503	325.232	308.652	316.985	272.505	292.917	235.939	-1.3206	1.53e-21
Solyc03g007890	12.3335	2.61006	13.8815	2.24919	33.2006	10.0671	30.1227	5.93261	-2.27757	4.09e-11
Solyc03g043860	4.23824	10.864	0	0.771761	0.024974	0	0	0.031359	1.35713	0.00497435
Solyc03g080190	5.94032	18.7518	1.2143	14.2273	2.05939	6.63127	1.43718	3.3245	1.65261	0.000577264
Solyc03g082550	0.875797	2.27536	0.458206	2.26987	0	1.13271	0.0779903	1.18949	1.34528	0.00709924
Solyc03g098710	21.2233	7.92645	3197.63	4451.5	33.3898	1008.55	368.793	224.979	-1.45132	0.00183003
Solyc03g098790	1989.72	455.722	4463.37	2188.3	3370.26	7542.52	3114.94	1810.8	-2.12198	8.27e-07
Solyc03g098795	1300.17	375.075	5155.58	3265.6	2140.77	1183.14	671.71	274.395	-1.79455	1.4e-06
Solyc03g111720	75.2245	191.328	67.3035	185.903	62.3117	112.537	46.7871	78.1042	1.33413	3.07e-07
Solyc03g115230	33.6631	7.6664	41.6664	14.0516	75.5391	21.6059	68.0434	16.3625	-2.18353	3.43e-08
Solyc03g119550	3.15092	0.797581	7.10095	6.97602	1.05118	3.44159	4.99353	3.95607	-2.01925	0.000194321
Solyc03g123540	54.5511	16.8011	67.6707	20.8867	25.8838	13.8248	61.7619	15.7222	-1.73136	2.47e-12
Solyc04g007000	53.5701	123.697	7.16708	62.3196	0.811944	17.5587	2.39004	25.3198	1.18449	0.00115795
Solyc04g011440	43.6643	12.8658	26.0853	9.24481	47.4987	16.6102	52.0701	14.8848	-1.79989	4.39e-05
Solyc04g012050	0.635007	3.96181	0.10171	1.34889	0.695478	0.260432	0.091292	0.066531	2.66029	0.0339304
Solyc04g012140	6.01436	12.3932	2.76139	3.83167	4.13936	4.48119	6.33248	5.45451	1.03119	0.0416929
Solyc04g040180	2.00204	9.36573	3.40361	5.80621	19.8028	12.4844	6.64096	8.29045	2.23029	0.000112246
Solyc04g071770	0.638613	6.36594	0.315422	2.59349	0.674791	2.66568	2.15466	5.55847	3.32536	1.68e-10
Solyc04g074310	6.64374	2.76864	14.6066	12.1351	2.66131	14.2119	23.6722	23.7541	-1.2893	1.1e-08
Solyc05g007770	4.52192	15.3549	1.57973	11.3694	2.7961	7.56103	0.0639817	2.94854	1.74092	8.46e-11
Solyc05g007895	38.313	19.2322	41.2031	24.9128	71.0475	25.6828	28.1456	15.7283	-1.03777	0.0290295
Solyc05g052670	1.07502	7.77333	0.0328963	1.46638	0.084035	0.491363	0.0344417	1.15132	2.8395	1.39e-15
Solyc05g052680	1.13518	3.47162	0.249238	1.48134	0.120246	0.152201	0.04797	0.132173	1.59517	4.73e-08
Solyc05g053850	0.194787	0	0	0	0.0278967	0	0.019111	0	-6.24161	0.0322249
Solyc06g035410	0.414902	0	0.138809	0.0383747	0	0.696087	0.234888	0.236486	-6.63973	0.00726203
Solyc06g036290	92.16	11.7795	133.332	32.694	277.877	43.6348	176.749	33.3969	-3.04352	0.0145564
Solyc06g054360	0.32319	0	0.35466	0.193056	0.843613	0.404107	1.18333	0.651157	-6.4048	0.0323854
Solyc06g069150	14.4619	36.7923	2.38399	3.69488	0.589471	3.13111	4.61377	4.08577	1.34672	0.000811086
Solyc06g072430	72.9484	20.7412	54.9624	26.7698	109.812	26.6913	67.6122	21.5367	-1.85332	4.57e-07
Solyc06g074420	2.71866	11.5673	6.73462	18.1446	9.06765	8.09384	3.71583	4.67543	2.11645	0.0167357
Solyc06g076020	184.961	68.6033	97.8973	45.5607	100.595	35.3534	97.9944	35.2559	-1.44715	4.85e-17
Solyc06g084280	1.22807	5.26499	4.57818	2.1331	1.62004	10.9054	12.2122	9.59378	2.0415	0.00106707
Solyc07g007150	30.6091	62.9452	27.35	46.9237	16.6485	42.3339	36.6764	55.0498	1.03642	0.0265463
Solyc07g007250	6904.41	3374.47	18439.3	12986.2	7616.33	10389.8	7752.22	5320.91	-1.03431	0.0220086
Solyc07g056670	1.06931	2.61065	5.31579	0.508602	5.9972	3.79494	3.37064	2.95733	1.25497	0.00152036
Solyc08g006765	17.9022	74.6612	1.90224	22.2182	0	0.541056	0	0.2213	2.08737	0.0181614
Solyc08g014000	32.3315	10.1116	20.7969	1.8231	0.158019	33.9188	130.269	86.5958	-1.69491	0.000844828
Solyc08g062340	56.8704	15.5305	45.563	10.1655	20.478	6.44909	43.7117	7.12485	-1.90341	8.18e-08
Solyc08g062437	21.8701	2.76935	32.4583	7.9136	24.8452	8.15549	56.0595	6.01985	-3.02712	4.19e-14
Solyc08g078700	85.6327	25.3598	105.102	24.4838	103.874	26.7492	123.492	18.2836	-1.8237	0.0237053
Solyc08g080540	27.8457	10.1698	18.4057	8.56805	25.0886	9.5079	31.1198	14.0363	-1.4877	1.81e-06
Solyc08g082680	2.60558	5.60023	1.15704	3.27499	0.603722	1.31919	0.599292	1.29778	1.09594	0.00692516
Solyc09g008970	36.47	9.47496	76.2564	29.8072	58.5109	28.3031	95.4327	27.8946	-1.98186	7.73e-08
Solyc09g014580	1.07681	4.08951	0.207233	1.56366	0.39624	1.99206	0.0461947	0.0793337	1.907	0.00398644
Solyc09g014930	0.521182	1.2363	1.12735	1.28725	1.3201	2.06137	1.52979	2.72908	1.21567	0.0482574
Solyc09g042660	0	0.894589	0.601812	0.380664	0.383963	0.588062	0.528076	1.23517	9.29021	2.68e-09
Solyc09g042665	0.590694	0	0.168967	0.565295	0.549114	0.325919	0.689229	0.520521	-6.37106	0.0204133
Solyc09g061840	24.6607	60.1093	33.878	36.5918	147.108	72.1123	47.6251	49.762	1.28819	0.0060995
Solyc09g066050	0.162613	0	0.256302	0.065139	0.458985	0.178876	0.191127	0.209526	-6.82649	0.0130735
Solyc09g084480	1546.31	557.571	3405.99	1684.95	4192.96	2647.68	2004.49	745.296	-1.47401	0.0015824
Solyc09g084490	805.953	345.435	2514.93	1296.55	2287.52	1145.85	217.988	79.0602	-1.22329	0.0169629
Solyc09g089530	861.14	276.394	1755	614.114	98.1457	143.95	78.2084	29.8499	-1.63041	0.00149783
Solyc10g049420	22.9725	88.0802	43.5297	100.669	1.58874	16.6388	20.5144	19.7905	1.93906	0.00173951
Solyc10g055560	2.48529	6.3873	4.77183	1.22923	8.94577	62.1949	47.7712	60.9889	1.33153	0.000166835
Solyc10g076500	0.547954	1.19313	0.07889	0.392412	0.00627533	0.0152247	0.0396317	0.057	1.10719	0.0161633
Solyc10g079140	2.75863	1.23939	11.6984	8.97369	13.1644	11.0809	15.4773	16.0623	-1.18722	0.000309901
Solyc10g079350	62.493	30.424	9.13543	13.7265	18.796	7.89862	0.335221	0.697247	-1.08224	0.00120796
Solyc10g084170	26.3818	6.60625	30.1434	9.47	38.9299	10.36	23.9477	6.55269	-2.0128	3.81e-13
Solyc10g085030	46.7729	21.5905	10.4452	8.45589	7.09351	3.68086	11.482	6.49994	-1.12526	0.0441527
Solyc11g066100	24.2212	3.48014	32.0693	6.94641	48.7162	13.3112	54.4168	12.4251	-2.86769	5.87e-09
Solyc11g071830	23.3399	4.76032	35.054	10.5819	47.3269	19.7714	63.4732	14.4	-2.33702	1.18e-15
Solyc12g006600	0.361805	0	0	0	0	0	0	0	-6.36411	0.0315045
Solyc12g008500	0.859099	2.0674	0.535008	1.28588	4.12818	0.85737	0.287285	0.353053	1.25612	0.0478406
Solyc12g008650	5.65002	2.02881	4.60456	5.84418	13.5623	5.0932	1.17954	0.878458	-1.4802	0.00398644
Solyc12g009560	21.5632	44.0953	14.2254	29.277	16.0292	29.1556	18.6523	45.8578	1.01071	1.85e-13
Solyc12g010800	10.4945	5.35524	6.94426	8.2312	4.8585	1.57049	1.84714	1.44576	-1.00515	0.00497435
Solyc12g021330	4.26627	55.7677	17.8156	17.9436	4.78443	17.3806	16.6666	13.5628	3.67926	2.34e-70
Solyc12g036470	8.52657	21.1466	0.1718	0.786853	0.057071	0.32614	0.280437	1.14592	1.30479	0.0156588
Solyc12g057090	0.956099	3.18144	0.182218	0.866077	8.29741	1.31622	0	0.091966	1.71382	3.29e-06
Solyc12g088360	6.74777	2.949	3.50333	2.75382	1.7304	3.92103	5.50335	4.37641	-1.19547	0.0098589
Solyc12g096570	8.28931	30.5806	0.811356	7.92829	0.273447	9.22876	0.863221	10.911	1.84556	6.72e-10
Solyc12g096780	180.046	59.9867	267.028	132.814	181.001	218.743	213.412	155.374	-1.63197	0.00196844
Solyc12g096790	4.16247	1.14131	30.1411	11.2824	18.0266	104.509	43.4337	41.4589	-1.85959	0.000592647

## Sheet: Table S7
Table S7 Differentially expressed genes in WT-30 versus ms-30 in petals
	FPKM
GeneID	SE_WT-30	SE_ms-30	PE_WT-30	PE_ms-30	ST_WT-30	ST_ms-30	CA_WT-30	CA_ms-30	log2FoldChange(WT-30/ms-30)	padj
Solyc01g005120	6.39962	5.26909	13.1249	6.24655	15.7521	30.3631	47.1736	49.2741	-1.1115	0.0145288
Solyc01g005150	4.51533	4.76336	2.71289	6.66384	1.25387	2.1818	1.71333	1.74281	1.18522	0.0137433
Solyc01g006390	1.57091	0.861262	26.0387	12.3402	62.708	154.668	208.461	107.76	-1.13797	0.0239026
Solyc01g006540	43.7459	55.878	11.7685	36.8272	0.365661	45.7495	16.9971	26.5981	1.62936	0.0369711
Solyc01g006555	60.0886	107.59	6.15557	14.8707	0.0468657	0.502296	1.15891	1.33732	1.16229	0.00118707
Solyc01g007200	0.700015	0.543739	16.4349	6.77895	7.51206	46.564	79.6552	66.3119	-1.32503	0.00870328
Solyc01g009350	0	0	0.703627	0	3.58	0.841471	0	0.031221	-8.39321	0.000555916
Solyc01g009900	5.04193	8.08831	1.87971	6.41798	0.218148	0.129038	0.031014	0.020829	1.65363	0.000655095
Solyc01g010080	0.199442	0.254342	0.285906	0	5.76007	0.195961	0.0109873	0.0470743	-8.05879	9.55e-05
Solyc01g010480	17.5104	35.1363	0.335661	1.7917	0.460552	2.26685	0.926475	2.09213	2.39058	0.00146136
Solyc01g010600	0.34728	0.317568	3.96652	0.676358	0	8.09663	24.9792	19.6965	-2.54641	0.00946422
Solyc01g014275	2.52438	2.84493	0.0714603	0.398285	0.146177	0.0526397	0.0121653	0.064275	2.3219	0.0122481
Solyc01g028800	0.143755	0.190364	1.10667	0.465232	11.9218	4.34254	2.69441	3.52326	-1.3825	0.0235697
Solyc01g028807	32.0487	40.7046	4.36521	12.6672	0.206179	1.05785	2.05047	4.08897	1.44376	0.000962733
Solyc01g044420	0	0.0322083	0.104205	0	0.301621	0.028666	0.036786	0.009712	-6.53148	0.0332265
Solyc01g049880	15.0673	23.0691	6.32279	13.8163	2.02654	5.73389	7.91219	12.6387	1.07544	0.0198355
Solyc01g067295	970.914	1185.28	353.715	876.875	8.75689	39.3744	17.8282	27.4499	1.25349	0.0114545
Solyc01g068040	0.0876513	0.141842	15.0716	0.231247	16.8184	34.8181	84.1597	54.6015	-6.00642	0.00110004
Solyc01g068320	0	0.0648417	1.44006	0.0751393	5.95382	6.31025	9.37233	8.42423	-4.23533	8.27e-07
Solyc01g079130	0	0	2.65078	0.234638	7.63538	4.30799	5.03426	4.19809	-3.56705	9.53e-16
Solyc01g079180	12.6495	4.95462	14.2866	3.75608	19.8798	7.45071	0.526989	0.353172	-2.13892	0.0139246
Solyc01g080790	9.93699	7.61931	4.50862	10.8277	0.194958	0.344514	0.190539	0.221868	1.18862	0.00113806
Solyc01g080900	0.532623	0.299081	2.48139	0.401946	0.641507	4.4865	13.0506	9.28697	-2.61805	0.0329333
Solyc01g081090	0.0974167	0.097187	1.09901	0.272761	3.79008	5.76503	3.42743	3.66075	-2.08371	0.0145225
Solyc01g086790	0	0	1.9222	0	8.68202	0.660741	0.0600807	0.0255223	-8.52868	0.000858062
Solyc01g086815	0.022115	0.0894377	1.26817	0	5.22662	0.576009	0.0580147	0.312553	-8.6162	0.000188387
Solyc01g087710	22.6434	28.8759	7.95594	21.0189	0.822049	22.6782	6.78961	7.74724	1.36028	0.0307767
Solyc01g087850	6.43012	8.41945	1.76162	3.73539	1.44983	1.82606	2.09739	2.28247	1.00423	0.0198274
Solyc01g088160	1.14179	0.677412	1.42755	0.100487	0.140393	1.05653	6.48136	5.36341	-3.78864	0.0171813
Solyc01g088300	6.0099	6.05933	0.661316	2.506	0.886547	1.00988	0.030681	0.0697547	1.82543	0.0169139
Solyc01g089910	3.65894	4.76458	13.902	5.31907	17.7158	49.8253	73.8484	65.9562	-1.44943	0.000157865
Solyc01g090000	0.022998	0.081714	0.399404	0	2.02472	0.434644	0.0768697	0	-7.07518	0.0178088
Solyc01g090010	0	0	0.641174	0	3.36297	1.27805	0.0434	0	-7.72546	0.0483457
Solyc01g090030	0.124388	0	1.43719	0.0215237	7.9435	1.97782	0.0508777	0.098104	-6.25621	0.00254101
Solyc01g090070	0	0	0.848247	0	5.6992	1.84474	0.465671	0.243359	-8.21171	0.00137214
Solyc01g090090	0	0	1.10805	0.02955	6.85083	1.41445	0	0.0705493	-5.48963	0.0385441
Solyc01g090560	4.78786	5.20877	1.9933	0.900467	1.3629	3.97913	4.36057	4.0676	-1.20779	0.0241419
Solyc01g090680	30.3139	42.1967	4.76367	10.5535	1.11259	2.175	2.28628	2.79911	1.0731	0.000123468
Solyc01g091050	7.52019	14.9589	4.38862	30.4294	14.7437	63.9316	1.08984	19.9134	2.70903	3.77e-05
Solyc01g091170	148.783	99.6889	99.9591	42.6241	4.51541	24.5063	80.0599	36.2162	-1.2858	0.0302525
Solyc01g091230	4.29638	4.41451	14.3005	3.69275	24.571	31.1401	58.4073	54.0187	-1.96891	0.00169085
Solyc01g091540	1.8755	0.607612	2.30821	0.486492	0.724622	3.18323	8.28646	5.91863	-2.27986	0.00559655
Solyc01g094090	24.0919	27.4276	10.2517	29.6296	0.607572	0.646393	0.0803607	0.0475693	1.50301	0.0167738
Solyc01g094970	0.360669	0.257902	0.919426	0.013028	33.6699	0.967184	0.136861	0.0553813	-5.87948	0.000294761
Solyc01g095720	1.46958	1.48976	6.10262	0.946054	96.5536	11.2729	6.55098	7.89797	-2.86593	6.58e-05
Solyc01g096140	0.172644	0.0867763	1.83186	0.362279	9.94708	3.29825	3.07828	2.05666	-2.51713	0.00512715
Solyc01g096260	10.8166	20.3401	2.96032	6.54096	0.661169	17.8973	7.17936	12.5346	1.04064	0.0193058
Solyc01g096560	0.880156	0.925573	0.745333	1.6445	0.24448	0.500558	0.70314	0.928157	1.0614	0.024461
Solyc01g096750	0.00584133	0.204869	15.5519	0.2636	4.61402	36.8251	107.645	101.906	-5.85476	0.00905442
Solyc01g097200	0.114966	0.033081	0.273866	0	3.50518	0.185854	0.024001	0	-6.52107	0.0320368
Solyc01g097280	23.2152	32.9086	3.18356	11.483	0.868572	0.277696	0.120411	0.256591	1.73269	0.000231088
Solyc01g097660	0.15651	0.154735	269.46	0.420668	3555.51	173.439	1.60601	0	-9.48587	0.00467204
Solyc01g098220	0.121797	0.160955	9.33152	0.0244213	231.838	13.7057	0.0450493	0	-8.58644	5.12e-24
Solyc01g098240	0.0352763	0.0402567	0.466334	0.061045	3.66182	1.00787	1.72954	2.17429	-2.95581	2.99e-05
Solyc01g098720	1.83961	2.31202	11.8331	1.3883	3.04722	33.024	64.8314	54.4806	-3.08969	0.000206345
Solyc01g099050	1.5646	1.81156	0.626519	1.44208	0.168414	0	0	0.0112893	1.09701	0.0418898
Solyc01g099150	3.14707	4.37454	2.10339	9.4894	4.10924	3.61311	0.687256	0.937679	2.05904	1.11e-07
Solyc01g099570	0	0	26.0638	0.0801053	508.136	31.6413	0.271636	0	-8.3356	0.000296474
Solyc01g099580	0.458277	0.572244	1.68599	0.311558	23.4573	3.8755	0.237832	0.273416	-2.52661	4.11e-12
Solyc01g099620	0.0221633	0.019425	2.06941	0.179522	23.099	2.42964	0.203981	0.20312	-3.75344	0.000221411
Solyc01g099970	2.61647	2.11591	1.61025	0.658316	3.04238	2.68893	5.95572	6.85366	-1.34324	0.0345705
Solyc01g100880	0	0	1.19037	0.098994	18.0854	8.02674	0.037817	0.0527753	-3.77024	0.0287615
Solyc01g100890	0.620462	0.767936	1.48854	0.146592	1.30759	0.221942	3.41693	3.48147	-3.32727	2.42e-05
Solyc01g100980	3.56155	3.6939	0.693687	1.80269	0.461839	0.634593	0.221575	0.331037	1.31807	0.0385985
Solyc01g102960	15.6129	3.31275	38.6705	9.00106	24.7953	3.55387	33.2426	5.12353	-2.14478	0.00442616
Solyc01g103250	6.12657	5.6477	18.3916	8.75061	23.9054	35.2563	62.0833	60.9208	-1.13191	0.00038143
Solyc01g104200	1.69087	1.95065	0.20008	0.910387	0.137832	0.0762047	0.0880407	0.0103633	2.11249	0.0011118
Solyc01g104550	2.25746	2.80516	0.88874	2.43876	0.126074	0.0844883	0	0	1.38139	0.0269725
Solyc01g104740	45.2339	14.8331	56.9218	15.9208	57.7806	15.312	44.9479	9.17756	-1.95212	8.95e-06
Solyc01g105000	20.3131	21.6568	8.33688	19.3614	1.66969	2.52329	1.27629	0.969997	1.12729	1.52e-05
Solyc01g105660	36.3178	65.6011	26.0891	58.4051	42.1855	29.5503	34.98	45.7979	1.10378	0.00381949
Solyc01g105850	2.44336	2.03559	0.241938	1.0569	0.0186247	0.134358	0	0.0224817	2.07027	0.0265612
Solyc01g106070	0.101809	0	2.23954	0.026742	7.17878	1.13312	0.0434093	0	-6.49445	0.000583263
Solyc01g106540	5.12279	4.72539	9.81758	4.82453	17.0531	11.3682	21.0652	20.4588	-1.06356	0.0488486
Solyc01g107180	5.96786	5.45091	19.1276	7.75351	22.2972	54.6289	65.776	62.7566	-1.3314	0.0139249
Solyc01g107260	1.81146	2.10857	4.09712	1.91027	3.52329	5.21572	6.34961	6.84606	-1.15279	0.00433456
Solyc01g107520	23.8859	32.4284	3.70714	12.1216	0.836714	0.990062	0.0555193	0.154205	1.63128	5.2e-06
Solyc01g108170	6.06597	7.12138	2.56523	7.91105	0.67001	6.97198	2.93148	4.44199	1.54646	2.39e-07
Solyc01g108880	9.32934	12.3939	5.9214	12.781	4.23367	11.5211	5.60756	7.39915	1.04068	0.000252945
Solyc01g108930	1.21435	1.39962	7.5807	2.87064	6.36896	23.0811	41.8369	36.4569	-1.42553	0.025744
Solyc01g109150	0.945229	0.7701	4.9266	0.904211	0.387462	7.72973	30.375	26.9295	-2.44008	0.0153536
Solyc01g109670	1.50223	1.01479	10.5848	0.988737	122.054	11.5579	26.5173	11.223	-3.41597	0.0494462
Solyc01g109730	0	0	1.12187	0	6.001	0.850494	0.00843033	0.017566	-8.90711	0.000118442
Solyc01g109820	0	0.0224943	0.282297	0	3.23671	0.187874	0.0587703	0.0412793	-6.619	0.0225298
Solyc01g110230	0	0	3.68266	0	21.6064	4.6567	0	0.0203767	-10.3521	0.000984852
Solyc01g110950	0	0	2.16689	0.0934443	10.2334	0.878147	0.0510283	0.014071	-4.77146	0.00973124
Solyc01g111070	3.41875	3.73951	20.0065	5.55046	356.225	109.412	0.826578	2.80641	-2.02518	0.0237496
Solyc01g111160	141.252	121.984	8.86429	31.6804	136.733	42.7861	2.74252	5.00821	1.78238	2.33e-08
Solyc01g112220	3.16567	3.97024	1.88336	3.96454	0.968492	3.12339	2.65817	3.14846	1.00753	0.00630436
Solyc02g005606	7.04988	9.97393	1.60403	5.52003	0	0.161221	0.28463	0.436305	1.71297	0.0353252
Solyc02g014750	0.679621	0.70287	7.10349	2.59393	0.450766	6.35054	20.3775	13.7765	-1.52914	0.00804159
Solyc02g030460	1.86939	1.15806	4.29662	0.882133	0.0742677	11.1479	28.7027	26.5478	-2.27962	0.0242408
Solyc02g030480	8.82391	8.39762	3.37993	7.57282	2.68349	1.18776	0.895073	0.959354	1.09472	0.000102628
Solyc02g032550	0	0	0.903268	0.0813797	15.3208	13.6039	0	0.0586483	-3.56602	0.000136544
Solyc02g033090	0	0	4.71155	0	38.6315	3.38821	0	0	-8.47955	0.000508541
Solyc02g038770	0	0	1.57249	0	6.78138	0.697095	0.0496577	0	-9.06046	9.39e-05
Solyc02g038810	0.233984	0.240804	0.361222	0.040513	0.662917	0.48961	1.41064	1.46296	-3.12824	0.00052814
Solyc02g061780	0.313018	1.30166	0.40558	0	0.238085	0.102345	1.70541	3.29616	-7.23056	0.000588738
Solyc02g062060	0	0	0.50892	0	3.28783	0.609012	0.040463	0	-7.23626	0.0152728
Solyc02g062070	0	0	0.560357	0	1.33393	0.497075	0	0	-7.90957	0.0272864
Solyc02g062160	0.118152	0.295228	13.6097	0.615209	286.796	26.1123	10.2445	15.3227	-4.50506	1.23e-24
Solyc02g062210	0.0243017	0	1.21567	0	10.5237	1.77535	0	0	-8.46142	0.000109334
Solyc02g062400	3.84399	4.00041	0.935578	3.01564	0.146165	0.0281263	0.0479483	0.061601	1.61253	0.000216417
Solyc02g062410	0	0.0843917	3.99774	0.217981	45.9764	3.9825	0.316038	0.201243	-4.25148	3.27e-10
Solyc02g062960	1.86171	3.77082	3.31413	18.5525	6.25428	29.6445	2.1097	10.1798	2.30596	0.00393498
Solyc02g063133	0	0	0.808987	0	9.86699	0.280875	0.135181	0.0452807	-7.21227	0.000552836
Solyc02g063250	0.726456	2.39463	0.329759	2.29188	0.312027	2.02345	0.405647	0.595304	2.61134	0.0225298
Solyc02g063470	0	0	0.606507	0.0106637	2.00358	0.25377	0.0194293	0	-5.69028	0.033144
Solyc02g065530	2.661	1.87893	1.19715	3.75923	3.18721	2.07113	0.194559	0.314525	1.56656	6.75e-05
Solyc02g065670	0	0	2.01212	0.0746123	22.8946	4.6902	0.0143677	0.162875	-4.87319	0.00016134
Solyc02g067100	4.16149	4.65197	8.74444	4.43609	6.63788	9.83445	14.9129	14.5831	-1.04667	0.00127369
Solyc02g067800	9.86916	16.452	7.39113	17.2845	3.18359	7.66098	3.52386	4.20502	1.10531	0.0179287
Solyc02g067970	2.98272	2.99395	7.49676	3.15834	10.857	8.02172	10.6393	9.53725	-1.34888	7.68e-05
Solyc02g068820	2.57191	3.25053	0.421794	1.08333	0.051872	0.10074	0.187683	0.264759	1.25483	0.0213184
Solyc02g069210	0.0206357	0.125916	3.74812	0.5789	22.2624	46.6578	62.2454	64.5332	-2.68898	0.0258973
Solyc02g070070	0.0189177	0.022336	0.0344343	0.446713	0.0450297	0.186277	0.030636	0.0961247	3.56524	0.0430661
Solyc02g070620	0.375487	0.288088	2.77191	0.470901	0.508272	4.16373	11.7624	11.2495	-2.5627	0.000615889
Solyc02g070755	10.3405	11.4328	5.01217	11.8461	0.641443	1.09061	0.939807	0.936103	1.15664	0.00301666
Solyc02g071050	0.236367	0.239199	4.48702	0.396995	41.7451	6.41291	1.00422	1.3422	-3.71637	0.000311496
Solyc02g071730	0.950296	1.56369	78.3662	12.8547	578.315	557.869	473.2	462.779	-2.65869	6.78e-06
Solyc02g072490	1.0797	1.0078	11.023	1.02172	39.4847	5.78123	0.471685	0.395549	-3.68037	0.0237496
Solyc02g077330	71.0146	77.4175	38.1285	80.8656	30.9254	117.066	37.7869	54.3596	1.0083	9.87e-06
Solyc02g077390	0.284198	0.339723	9.51411	0.519314	0.12051	16.8309	59.4455	64.9442	-4.17484	0.0004688
Solyc02g077500	0	0.0370083	0.22002	0	0.778355	0.204834	0.138331	0.198089	-6.24552	0.0272864
Solyc02g078040	82.1684	87.5549	358.47	165.598	17.6125	1241.19	1528.16	1347.39	-1.1484	0.0310726
Solyc02g078650	2.59563	5.09332	0.403654	2.23956	0.114238	0	0	0	2.35227	0.0011118
Solyc02g078690	0.0768903	0.242072	5.18099	0.628225	10.9854	10.5174	25.1132	14.5637	-3.03318	0.000460739
Solyc02g079140	0	0.0265177	0.538703	0.095864	1.54215	0.996795	0.879337	1.00447	-2.57983	0.021054
Solyc02g079430	3.17552	6.48932	3.59101	8.45663	3.94378	8.40546	7.02069	10.3706	1.1566	0.00172055
Solyc02g079810	0.0303937	0	8.91162	0.0730313	100.129	12.8525	0.330703	0.184569	-7.09469	2.2e-09
Solyc02g080010	2.4345	1.52068	0.4293	0.0924697	1.41882	0.930527	1.52619	1.57826	-2.24072	0.039484
Solyc02g080220	57.716	77.9457	22.4084	66.5598	1.18512	1.41487	0.123973	0.257166	1.53547	0.00329424
Solyc02g080660	14.7885	12.7344	26.599	12.1429	12.0278	16.8785	29.5155	26.6119	-1.24673	5.35e-05
Solyc02g081120	6.60826	8.52746	11.7002	3.25702	2.52177	3.37454	45.2826	41.8664	-1.84483	0.0387093
Solyc02g081180	2.36482	2.71792	0	0.329041	0.23183	0.326457	0.136133	0.102858	6.28282	0.0233811
Solyc02g081770	12.603	14.2876	4.86912	12.4872	0.175991	0.306763	0.0478973	0.0948927	1.30839	0.0114667
Solyc02g082190	14.7737	12.2609	36.013	12.9707	87.8217	25.989	25.4423	23.4361	-1.66883	0.0277597
Solyc02g082300	1.47256	1.37206	5.30515	1.53187	19.216	6.14051	3.13896	2.26248	-1.99507	0.0349512
Solyc02g082310	0.210029	0.176897	1.18094	0.458024	6.66745	2.70526	1.72253	1.55678	-1.49519	0.0472483
Solyc02g082410	0.550367	0.564339	1.76298	0.435089	15.3726	6.49264	6.64435	6.62206	-2.02733	0.0251064
Solyc02g082930	64.1397	91.1365	12.0273	40.8695	7.09193	3.79896	0.505349	2.48907	1.6578	8.98e-07
Solyc02g083000	1.1013	5.04422	0.779079	4.35084	0.711847	4.49351	1.28266	5.2202	2.27657	0.0168861
Solyc02g083280	163.329	248.395	24.7563	67.0021	6.62742	21.0999	11.5952	15.4923	1.30801	0.0135196
Solyc02g083790	1.10127	0.856547	5.47595	1.63427	11.5227	39.8205	29.0602	32.6372	-1.79202	9.78e-06
Solyc02g083890	22.9299	24.743	67.6545	33.204	50.8358	63.5847	74.4082	68.5404	-1.15268	0.00311717
Solyc02g084780	0	0	0.186209	0	0.362954	0.141972	0.011335	0.0123663	-6.68612	0.0113416
Solyc02g084910	0.465312	0.488627	4.88122	1.1739	11.0151	9.38105	15.9091	14.6633	-2.05953	0.00913106
Solyc02g084930	4.30291	4.71758	1.16355	2.6794	0.141389	1.64468	1.57959	3.0354	1.09619	0.0163853
Solyc02g085440	0.419093	0.251794	1.90756	0.307336	21.1403	6.91636	2.18833	2.76344	-2.87293	0.0484475
Solyc02g085500	0.530711	1.11103	4.94115	1.52503	3.28455	38.9054	29.9947	35.6828	-1.7218	0.0104774
Solyc02g085630	6.44226	25.8599	1.23411	12.3252	0.626477	27.532	1.20541	13.3909	3.15947	7.01e-06
Solyc02g086452	0.525875	0.497424	0.154284	0.418821	0.367736	0.132514	0.101582	0.1384	1.35316	0.0118443
Solyc02g086458	7.02818	10.6075	1.0135	2.66374	3.54654	1.62838	0.253701	0.89407	1.26225	0.00404398
Solyc02g086760	0.129299	0.247707	2.10322	0.454176	6.5924	7.55754	9.60996	9.76374	-2.29447	0.000135866
Solyc02g086980	8.0729	13.7088	9.15615	22.1328	4.87001	6.468	3.5916	3.82355	1.17546	6.23e-06
Solyc02g087110	5.03605	5.93356	0.224642	1.64345	0	0.0381063	0.0334433	0.010981	2.70153	0.00149254
Solyc02g087120	0.130672	0.0609003	2.11424	0.172445	2.55127	3.19873	6.36211	5.26593	-3.76749	9.23e-07
Solyc02g087530	0.0132483	0	0.39903	0	2.86938	0.410374	0.0111893	0.0721137	-7.71057	0.000121171
Solyc02g087580	4.53293	5.83119	2.16363	4.62366	0.390358	2.04377	2.49072	3.87167	1.03847	0.012617
Solyc02g088180	3.48958	5.54397	1.13251	4.89082	1.46784	3.00497	0.363376	2.12657	1.96609	0.00160574
Solyc02g088340	29.6848	38.9093	9.46074	22.5717	4.87982	9.56946	3.7604	7.64185	1.21241	0.0132087
Solyc02g088850	0.366137	0.29748	0.6543	0.293525	2.76708	1.29809	1.51431	1.59143	-1.22214	0.0330439
Solyc02g089170	1.16032	1.19463	1.04207	3.59918	60.5225	9.94805	0	0.014625	1.67825	0.0127793
Solyc02g089930	4.67946	5.24418	1.4051	2.99205	4.03146	1.91236	2.17814	2.6756	1.01255	0.000440414
Solyc02g090170	0.187477	0.040083	2.5898	0.123617	4.09846	16.0978	22.2033	17.8722	-4.37589	0.000234545
Solyc02g091690	10.5674	6.98283	27.7379	12.555	37.5181	48.2784	94.4434	64.8006	-1.18015	0.0346811
Solyc02g091830	2.15347	1.31379	4.05216	1.49035	31.2032	5.57414	5.13723	4.35918	-1.58351	0.0047188
Solyc02g091980	0.135734	0.0551013	4.05372	0.501594	47.1752	6.15277	0.0709407	0.15974	-3.20997	0.015896
Solyc02g092050	4.89568	4.85188	9.17734	3.87484	0.846615	8.11599	22.8699	19.108	-1.27753	0.0105052
Solyc02g092490	5.34992	3.93943	6.98801	3.07336	0.292714	1.25599	12.1409	11.4426	-1.24854	0.0277591
Solyc02g092680	0.0883913	0.0499523	2.85439	0.0973327	2.94394	10.7181	3.08111	4.91455	-5.09296	6.31e-05
Solyc02g092880	0.612805	0.88622	5.8087	2.78668	3.82093	2.70629	1.95912	2.31177	-1.15915	0.0264764
Solyc02g093180	3.07079	1.45453	9.32207	4.4312	3.98793	13.8426	16.9736	12.5671	-1.1615	1.41e-05
Solyc02g093280	1.28513	0.953714	3.68929	0.993328	2.73854	6.77454	10.6246	7.7764	-1.91444	0.0285433
Solyc03g005910	8.2937	10.5774	2.3491	6.66263	0.896343	0.713462	0.202924	0.293482	1.40918	0.000412747
Solyc03g006240	15.8462	13.6016	6.01641	12.8513	4.43355	16.6193	3.10779	4.53403	1.0421	0.0109871
Solyc03g006410	6.10809	12.2236	5.98308	14.3529	0.133162	0.326587	0.692358	0.70526	1.21914	0.00950358
Solyc03g006450	18.4509	22.6395	7.28653	21.3372	0.0968873	0.32813	0.0252957	0.0232357	1.48741	0.000499504
Solyc03g006910	8.63917	4.12773	12.3904	4.16963	0.686607	1.96571	1.05281	1.08432	-1.67808	0.0181985
Solyc03g007060	0.513706	0.779709	4.2006	0.551476	21.0772	4.95009	3.99064	4.08292	-3.11202	4.44e-05
Solyc03g007200	0.13368	0.180395	0.82497	0.154585	1.34194	3.54502	3.87118	2.79149	-2.44144	0.0141449
Solyc03g007240	309.664	137.423	187.882	97.1736	259.3	270.82	428.825	272.194	-1.02975	4.82e-16
Solyc03g007690	1.18392	0.918903	13.8754	4.41296	7.62651	26.2116	64.4285	54.8656	-1.68962	0.00203792
Solyc03g007760	6.9814	4.93984	11.969	6.24052	28.3151	6.63024	23.0139	19.1478	-1.07249	0.0155868
Solyc03g007890	12.3335	2.61006	13.8815	2.24919	33.2006	10.0671	30.1227	5.93261	-2.66933	0.000128759
Solyc03g020010	1.64195	2.63923	0.179729	1.10557	0.148948	1.68223	0.177949	0.651809	2.47078	0.0271914
Solyc03g020040	45.9414	53.7777	2.51708	10.5741	1.43846	0.548218	0.42292	0.980733	1.9134	0.016602
Solyc03g025330	0.410403	0.50563	0.0532043	0.624586	0.364242	0.432033	0.414748	0.518702	3.47687	0.00339045
Solyc03g025680	12.7493	12.5472	4.89191	11.6852	1.23367	2.12295	1.08372	0.878395	1.16261	0.034813
Solyc03g025720	8.96741	3.2454	11.8868	5.46492	63.2621	101.571	52.8819	66.2312	-1.24345	0.00025368
Solyc03g025770	3.08097	3.19854	0.693025	2.14714	0.243646	0.067972	0	0	1.58826	0.0075443
Solyc03g025790	2.54125	2.49179	17.5928	7.42362	4.01377	16.699	36.3992	24.0537	-1.28322	0.00636424
Solyc03g031880	0.50278	0.445657	2.43548	0.647698	29.0307	7.26653	0.574124	0.609421	-2.10027	0.0220896
Solyc03g034000	3.86915	4.99739	0.647457	2.08736	0.248027	0.343573	0.43457	1.19391	1.557	0.0347108
Solyc03g034380	38.522	57.0795	0.685923	3.791	4.29717	2.24166	0.106569	0.203394	2.31385	0.00910496
Solyc03g034390	47.3042	81.6705	4.64686	21.9768	5.04304	1.18588	0	0.244829	2.11741	5.88e-06
Solyc03g043860	4.23824	10.864	0	0.771761	0.024974	0	0	0.031359	7.55445	6.68e-05
Solyc03g044880	1.13244	1.01238	3.06951	1.44054	20.6202	13.6049	4.8992	5.59102	-1.23133	0.0394747
Solyc03g059190	1.49611	1.47499	1.4454	0.578542	0.319603	2.13639	4.77108	4.27238	-1.3668	0.0385985
Solyc03g062670	0	0	0.816258	0	3.82334	0.208948	0.021407	0.0624317	-8.32768	0.000499504
Solyc03g063140	2.01685	1.76327	5.21583	0.016143	27.8351	4.67929	1.50978	1.11247	-7.9697	1.32e-07
Solyc03g063370	0.973033	0.868098	0.913966	0.154525	0.805344	1.11975	2.9922	2.45771	-2.51829	0.0245585
Solyc03g064010	4.1254	2.74982	11.0205	5.36573	1.69866	15.8119	32.496	29.9308	-1.08973	0.0109871
Solyc03g071590	53.2039	65.9268	4.73968	10.1552	4.23288	3.60739	3.17858	4.11391	1.0418	0.000937601
Solyc03g078330	0.0556457	0.0442277	0.67254	0.012416	0.0539017	3.79651	6.19037	8.79259	-5.72856	0.00167295
Solyc03g078600	0.0167857	0.0122857	1.51784	0.071409	6.371	1.11752	0.302547	0.342047	-4.57253	0.00860247
Solyc03g078780	9.0216	3.84445	14.6419	5.70039	5.95211	2.6173	2.52114	1.13726	-1.50619	0.0165868
Solyc03g080190	5.94032	18.7518	1.2143	14.2273	2.05939	6.63127	1.43718	3.3245	3.40522	0.000132391
Solyc03g082430	1.34225	0.899871	7.27587	1.69993	5.1502	4.74611	7.73133	4.51098	-2.14436	0.02076
Solyc03g082550	0.875797	2.27536	0.458206	2.26987	0	1.13271	0.0779903	1.18949	2.18961	0.000588738
Solyc03g082810	0.147064	0.2467	0.441909	0	10.803	1.99979	0.161722	0.025448	-7.03958	0.0109871
Solyc03g083590	0.36391	0.243293	1.31091	0.58169	21.6635	2.31355	2.09568	2.06467	-1.27261	0.0148186
Solyc03g083960	2.10413	1.13009	6.13013	2.25148	16.4916	10.9452	6.88748	5.30544	-1.5386	2.54e-05
Solyc03g093310	3.29157	3.50222	8.4812	2.83675	5.31151	10.2052	17.4627	16.6032	-1.62185	0.000210889
Solyc03g093370	0	0	0.242086	0.007644	2.47262	0.873671	0.148358	0.0753253	-5.2338	0.0247527
Solyc03g093650	0	0.003729	0.054578	0	0.156204	0.00934767	0.00395	0	-6.73811	0.0378107
Solyc03g093760	0.231395	0.200134	0.662348	0.226856	4.4999	0.654215	0.504708	0.741993	-1.65305	0.00649657
Solyc03g095210	0.0201203	0	0.708262	0.0270817	4.23738	0.901546	0.060881	0.011582	-4.93296	0.0265424
Solyc03g095700	4.93186	5.22222	3.8028	10.0263	0.7027	1.21802	1.30849	1.12212	1.33183	0.0252585
Solyc03g096070	0.718425	0.70267	0.847705	0.341897	2.62758	1.01838	1.65357	1.8322	-1.3941	0.015896
Solyc03g096770	14.9661	14.3401	5.0608	11.0921	40.6368	21.0305	2.36739	2.31631	1.05597	0.0117688
Solyc03g097560	0.257189	0.243881	34.2764	4.95261	124.383	112.594	167.823	163.585	-2.87904	4.49e-31
Solyc03g097570	0.357293	0.503885	0.191604	0.768108	0.014114	0.224436	0.135487	0.322315	1.87789	0.0265612
Solyc03g097870	183.722	211.643	40.3866	91.2148	0.387302	3.93677	12.0358	20.7662	1.0748	0.000552836
Solyc03g098760	3.75765	3.68421	1249.25	152.756	105.44	56.8008	3.53779	0.681599	-3.0476	0.000111515
Solyc03g111550	33.9656	35.8693	20.4753	46.2618	41.6231	16.2347	4.37575	4.84295	1.05847	0.00312318
Solyc03g111720	75.2245	191.328	67.3035	185.903	62.3117	112.537	46.7871	78.1042	1.3516	0.0122881
Solyc03g111815	261.806	329.526	86.2749	252.38	1.66247	3.83425	0.061501	0.374179	1.51487	0.00930776
Solyc03g112120	0.143357	0.119627	2.1394	0.149918	40.1787	2.18497	0.364091	0.138411	-3.99703	0.00913106
Solyc03g112320	15.2186	18.8362	5.17497	14.4572	1.59807	2.07733	0.941793	1.62055	1.42058	6.76e-06
Solyc03g112540	3.37505	1.75346	2.98527	1.30661	3.03992	3.52236	4.56295	3.28443	-1.22827	0.0402392
Solyc03g112690	0.00399367	0	0.461703	0	3.77192	0.388302	0.0523643	0.00940067	-8.67951	8.14e-05
Solyc03g113690	0	0	0.485759	0.0229407	1.43266	0.208804	0	0	-4.51203	0.0105315
Solyc03g113825	0	0	0.479182	0	3.37089	0.447337	0	0	-8.10307	0.0018846
Solyc03g113850	0.130938	0.111156	0.689861	0.103119	0.590945	0.443421	1.10869	0.81245	-2.7711	0.00554332
Solyc03g114220	0	0	0.500561	0	1.51019	0.0729237	0	0	-7.34684	0.00206979
Solyc03g114260	0	0	1.86681	0.022218	9.77079	0.607086	0	0	-6.29553	0.000528406
Solyc03g114560	55.726	71.6801	31.269	81.1781	3.03769	2.05628	0.109295	0.610015	1.31074	0.000201813
Solyc03g114750	3.52025	3.51878	0.783777	2.27078	2.65423	0.239306	0.0636947	0.161568	1.47409	0.0034719
Solyc03g115010	6.29962	6.53421	1.17646	3.35283	0.264327	0.412345	0	0.097076	1.45569	0.00835942
Solyc03g115160	0.146225	0.143124	2.80719	0.129228	1.95838	5.5629	16.6223	14.3722	-4.44134	4.83e-08
Solyc03g115220	66.9327	84.947	12.8906	33.1583	3.8911	24.6205	4.75735	7.14497	1.26413	3.88e-06
Solyc03g115230	33.6631	7.6664	41.6664	14.0516	75.5391	21.6059	68.0434	16.3625	-1.63435	0.00016134
Solyc03g116270	1.88617	0.299114	0.183585	0	0.0682637	0.024944	0.201333	0.074512	-6.58404	0.0220226
Solyc03g116280	19.8761	20.6969	4.75141	10.2941	0.720024	1.89119	1.17689	2.13552	1.03312	0.0134152
Solyc03g116510	13.0147	14.9426	21.3528	8.70746	82.3416	147.147	44.4665	48.1446	-1.4167	0.00681722
Solyc03g116520	0.660986	0.0871093	5.61918	0.696391	48.8674	12.096	5.44974	3.01081	-3.15432	0.00352919
Solyc03g116610	10.3192	10.9206	1.58849	5.30949	21.2104	10.0317	1.87011	2.48968	1.66711	3.14e-05
Solyc03g116750	12.1471	11.2365	24.4216	10.9986	75.0464	34.1587	45.2789	46.8781	-1.28901	0.00188372
Solyc03g116950	0.100082	0.0509353	1.67671	0.227044	21.4679	1.92748	0	0.0324843	-3.08988	0.0336435
Solyc03g117630	3.69611	2.9731	6.44254	3.25464	16.8281	7.25524	9.94309	6.96803	-1.0463	0.00564624
Solyc03g118190	3.16639	3.45695	0.663475	1.97568	0.443279	0.18301	0.0474447	0.136987	1.52612	0.0171813
Solyc03g118560	0.0209427	0	1.50302	0	6.47698	1.68372	0	0.146795	-8.02937	0.0263362
Solyc03g119220	6.21565	5.52101	11.5369	5.52614	3.97677	11.6409	19.7354	19.6807	-1.11774	0.00713968
Solyc03g119310	4.99857	5.53432	11.0092	5.37609	6.4956	19.8618	33.1741	26.5652	-1.09868	0.00893618
Solyc03g119930	18.7475	23.0585	4.18201	11.3458	5.97479	6.39811	3.63933	4.76912	1.37705	3.6e-05
Solyc03g120360	0.481476	0.269019	4.40762	1.62884	1.39314	7.12235	13.659	10.0007	-1.48315	0.0238921
Solyc03g120900	4.08427	4.37124	16.5475	7.74995	51.0425	21.6286	14.5868	11.3614	-1.2362	0.0140822
Solyc03g121100	2.56245	2.20108	19.9263	4.94692	352.603	33.0167	1.95654	1.773	-2.12485	1.71e-09
Solyc03g121810	0.031737	0.0286277	0.310276	0.01424	3.24702	0.172384	0.074294	0.033895	-4.67396	0.00907349
Solyc03g122140	17.6772	18.9031	6.20821	18.5831	0.747588	0.50501	0.0374737	0.0436713	1.53201	0.00256387
Solyc03g123540	54.5511	16.8011	67.6707	20.8867	25.8838	13.8248	61.7619	15.7222	-1.76192	2.67e-06
Solyc03g123820	0	0	2.08933	0.119638	14.3169	3.76823	0.224204	0.140376	-4.3021	0.000487204
Solyc03g150157	2.75505	2.29674	3.41082	1.66958	2.19001	4.08744	9.33788	9.04987	-1.07477	0.0368674
Solyc04g005550	2.16025	2.20571	0.418584	1.23156	0.802061	0.58965	0.115197	0.22402	1.5265	0.0193402
Solyc04g005610	0.179704	0.806182	0.315687	5.04939	0.160208	3.58958	0.0601827	0.304926	3.94534	4.81e-08
Solyc04g005740	0	0	4.73499	0.0260353	22.4256	2.18009	0.120298	0.0498607	-7.42665	0.00512715
Solyc04g007000	53.5701	123.697	7.16708	62.3196	0.811944	17.5587	2.39004	25.3198	2.89639	0.0209115
Solyc04g007200	1.53543	2.71041	3.89132	13.0191	1.21747	0.443224	0.354115	0.129132	1.61716	9.08e-05
Solyc04g007820	65.8214	74.4281	24.313	55.6162	2.81825	2.66498	0.070963	0.208452	1.13872	0.0478833
Solyc04g007825	202.198	257.585	95.3668	284.981	4.65622	6.13797	0.159288	0.341194	1.51925	0.000565901
Solyc04g007940	0.128844	0.168142	2.57198	0.14835	2.21016	0.522911	1.23753	1.25736	-4.33733	1.08e-05
Solyc04g008000	0	0	0.666227	0	15.403	3.55199	0.0187157	0.020464	-7.97331	0.0357467
Solyc04g008330	2.84633	2.1699	1.71718	0.231887	0.212749	1.41204	3.49634	2.82207	-2.92611	0.00634443
Solyc04g009910	1.54705	1.34033	6.1887	1.89513	7.88782	10.6215	12.9029	13.5361	-1.79471	3.51e-09
Solyc04g011440	43.6643	12.8658	26.0853	9.24481	47.4987	16.6102	52.0701	14.8848	-1.56866	0.000224366
Solyc04g014520	1.11374	1.27697	3.74964	11.5026	0.322365	10.3147	5.15727	6.08345	1.53766	1.35e-07
Solyc04g014530	7.28905	8.18247	3.74598	10.1958	0.082989	1.94988	0.402464	0.696019	1.31494	0.0118173
Solyc04g014645	1.18711	1.26966	1.82227	0.504665	0.970815	1.58214	6.02441	4.37589	-1.87723	0.00438127
Solyc04g014750	0.028203	0.242023	7.03808	2.41657	0.240427	2.4136	11.6917	8.62533	-1.65665	0.00672596
Solyc04g015380	0	0.0165677	1.39591	0	6.52056	1.55931	0	0.0116753	-9.6346	6.78e-06
Solyc04g016000	0.892562	0.849606	2.51726	0.44745	23.7084	2.04335	1.92905	0.83691	-2.64885	0.0112595
Solyc04g025760	0.0183693	0	0.35156	0	1.62171	0.177151	0.043219	0	-6.74682	0.0117053
Solyc04g049090	24.744	30.5708	5.34416	14.5896	4.32272	4.40822	1.13102	1.13409	1.38421	5.88e-06
Solyc04g050570	39.0276	38.1535	8.59443	25.4128	1.25169	0.591018	0.222236	0.223432	1.48715	1e-08
Solyc04g050577	0.283121	0.082265	0.801742	0.149318	16.8585	3.76732	2.50279	2.54468	-2.51029	0.000533771
Solyc04g050770	0	0	1.26521	0.0133107	9.7821	2.17482	0	0.012864	-6.81862	0.000532321
Solyc04g051360	0.372047	0.592639	0	0.252696	0.007812	0.859862	0.24794	0.343089	6.75319	0.0268614
Solyc04g051590	0.133183	0.0583793	0.150571	0	0.00915867	0.0269493	0	0.0105267	-6.86937	0.0193058
Solyc04g054220	3.13704	2.77981	0.813171	2.34941	0	0.00913933	0	0	1.4483	0.0478959
Solyc04g054250	0.0109587	0.0101087	0	0.165315	0.0198677	0.13581	0.00953233	0.147125	6.64658	0.030407
Solyc04g054840	0	0	0.160118	0	0.0827517	0.0307993	0.137968	0.0677427	-6.62878	0.0110489
Solyc04g054890	5.60381	4.70342	21.5928	5.08752	78.855	17.5756	19.1344	16.7147	-2.30151	0.00512715
Solyc04g064620	1.41495	1.1454	13.2103	34.702	2.95205	12.3009	6.1265	5.70116	1.33556	7.75e-06
Solyc04g064760	22.2153	23.5329	61.4792	22.2751	95.4186	39.8479	37.2698	34.1315	-1.66765	0.0425651
Solyc04g070970	5.5747	4.38765	4.94338	12.2176	0.522616	2.95747	5.13357	5.48847	1.21603	0.00312952
Solyc04g071070	71.2264	81.712	80.4847	252.164	87.6718	38.9995	41.6412	52.2242	1.58383	2.44e-10
Solyc04g071800	67.6839	107.737	16.5542	52.8372	8.32788	5.39051	3.48373	9.91572	1.60766	1.48e-08
Solyc04g072043	0.10641	0.132286	1.9819	0.455331	58.1714	9.33641	2.26812	2.44718	-2.2611	0.0238921
Solyc04g074470	11.91	11.7834	2.0092	5.82155	0.203487	0.361457	0.244569	0.0539193	1.45935	0.0496718
Solyc04g074740	7.83963	6.09943	19.5123	5.86428	327.703	105.368	13.8199	12.9518	-1.92045	0.0233811
Solyc04g074810	2.43879	2.40572	22.3614	6.12969	26.7837	35.4531	39.1253	36.3373	-1.93004	8.11e-07
Solyc04g074990	33.9311	29.7207	59.1601	21.9333	19.3257	50.3019	96.452	64.4034	-1.50751	5.88e-06
Solyc04g076240	0	0	1.03985	0.0940053	0.141808	0.564306	1.40158	1.04351	-3.50841	0.0113835
Solyc04g076950	2.63148	4.70516	0.776172	0.153506	0.119944	0.161228	1.64434	1.02264	-2.35708	0.00526152
Solyc04g076990	18.587	26.6292	3.09957	6.72778	4.24963	6.94101	5.76692	7.24002	1.03905	2.95e-05
Solyc04g077140	8.21786	4.70467	16.3455	7.98261	12.8961	18.0209	29.8914	24.5624	-1.10125	5.5e-05
Solyc04g077210	0.520554	0.370932	1.61939	0	0.23884	0.0459317	4.61523	5.37208	-9.98918	0.00188372
Solyc04g077460	3.41638	2.86004	4.95289	2.69685	11.0144	7.32945	6.9707	5.94583	-1.00568	0.0402392
Solyc04g077890	0	0	1.22498	0	7.20021	1.13583	0	0	-8.98906	0.000111515
Solyc04g077990	1.44517	0.939051	10.623	3.35736	10.184	5.50362	35.5681	14.0378	-1.716	0.000772012
Solyc04g078210	0	0.0291397	1.23338	0.13591	19.3491	2.81806	1.77151	1.61743	-3.27094	0.0468023
Solyc04g079130	8.27783	7.80616	25.4511	12.164	6.49633	25.0477	46.1094	40.2453	-1.12363	0.000163787
Solyc04g079700	1.14779	1.09193	5.23848	1.75395	7.78425	22.7716	34.1662	44.5393	-1.63211	1.8e-05
Solyc04g079820	1.09727	1.87657	0.658947	1.87509	0.06007	0.491665	0.165409	0.142079	1.38065	0.0483457
Solyc04g080720	2.75557	3.16961	7.82074	0.331127	0.231868	12.7394	33.1224	39.3402	-4.55208	2.15e-05
Solyc04g080970	0.677695	0.50462	1.61189	0.206794	0.607584	7.52332	6.84918	7.7456	-2.94699	0.0148186
Solyc04g080990	0	0	0.258335	0	0.603012	0.173068	0	0	-7.14681	0.0113416
Solyc04g081080	0.924695	0.675628	7.80278	1.84065	0.956648	10.1488	23.2975	21.1454	-2.09986	0.00270629
Solyc04g081770	7.32691	6.54703	0.441553	1.61397	0.467722	0.118052	0.164255	0.151402	1.76301	0.000257837
Solyc04g082460	3.63026	5.27652	15.743	6.92742	60.6445	33.3892	34.2306	35.0451	-1.28042	1.48e-08
Solyc04g150146	0	0	0.247081	0	1.71412	0.102482	0	0	-6.38745	0.0485395
Solyc04g150164	9.94537	10.0177	2.92639	7.15153	1.36215	7.62556	2.40596	3.51579	1.24948	0.0177373
Solyc05g005090	0.016447	0.176637	0.820681	0.0844503	0.223566	0.151218	3.16824	3.47802	-3.33597	0.0496718
Solyc05g005280	10.1778	14.9504	0.581149	2.29589	0.257748	1.08928	0.477884	0.886536	1.90717	0.000135785
Solyc05g005680	17.2067	18.1548	6.10204	15.9064	0.355268	3.61789	0.91215	1.16786	1.33324	0.0105052
Solyc05g005700	3.00738	2.97758	9.43721	2.57122	75.1063	14.739	7.62119	7.86061	-2.03243	0.000191338
Solyc05g005710	370.326	252.209	545.713	262.209	1147.03	446.518	482.982	332.924	-1.17656	8.75e-05
Solyc05g005720	0.254436	0.0315077	0.37541	0	10.374	0.578095	0.144243	0.256738	-8.78327	1.54e-07
Solyc05g006180	0	0	0.0946083	0	1.66564	0.189982	0	0.007333	-6.39158	0.0203995
Solyc05g006430	0.304417	0.391144	0.590367	0.0797667	3.36544	0.987213	0.38979	0.371553	-3.04951	0.0135757
Solyc05g006730	8.59676	9.36007	1.68016	4.65658	0.280514	0.35764	0.018427	0	1.41515	0.00795968
Solyc05g007520	0	0.0182023	1.09346	0.0690373	15.7065	0.980925	0.049104	0	-3.91532	0.004576
Solyc05g007770	4.52192	15.3549	1.57973	11.3694	2.7961	7.56103	0.0639817	2.94854	2.72518	3.43e-05
Solyc05g007870	0.200947	0.0634153	5.76293	0.759394	54.1344	6.76592	6.17357	5.10391	-3.07536	2.63e-06
Solyc05g008105	25.3014	37.3487	5.86846	14.8633	23.0301	21.0818	5.51746	14.4575	1.24084	0.0257734
Solyc05g008390	1.58614	1.88449	4.81789	1.36797	31.7092	8.35466	11.0111	8.74834	-1.94909	0.000281221
Solyc05g009270	16.848	15.4162	13.9274	35.6724	0.102794	1.34051	0.283929	0.82064	1.25422	0.000105354
Solyc05g009410	0.400192	0.944044	1.71255	0.217663	24.2057	1.18124	0.170585	0.251919	-3.18592	0.033144
Solyc05g009790	76.211	105.057	16.0615	49.5501	2.71563	7.36784	10.1306	27.0021	1.53299	0.000773394
Solyc05g010490	0	0	0.366762	0	3.31237	0.24812	0.0184257	0	-6.79582	0.0348467
Solyc05g010500	0	0	0.578737	0	5.6322	0.437482	0	0	-7.53612	0.000294761
Solyc05g011970	5.8469	4.94266	2.56064	1.27078	10.1885	7.37846	12.9629	12.089	-1.09263	0.000123669
Solyc05g012350	7.11545	9.27487	2.20332	6.60574	0.499974	0.831773	1.02356	0.912503	1.53088	0.000785268
Solyc05g012580	1512.27	2336.08	1248.9	3118.68	173.609	740.001	287.879	471.641	1.22767	7.5e-06
Solyc05g012950	24.6043	28.0039	12.5698	32.7187	1.79872	1.62114	1.10269	1.06374	1.29753	0.00996075
Solyc05g012955	13.096	13.2397	5.22588	16.4602	0.531945	0.375746	0.016271	0.035371	1.56915	0.000174555
Solyc05g013010	28.366	29.0938	11.7818	30.5978	0.403387	0.322121	0.0105323	0.011638	1.31988	0.00609857
Solyc05g013420	0	0	0.535489	0	2.23707	0.440936	0.0590623	0.104752	-7.12655	0.0241419
Solyc05g013930	0	0	1.18969	0	0.258701	1.72357	7.0424	5.59872	-9.75806	2.46e-07
Solyc05g014000	190.204	190.176	85.9229	208.695	152.609	116.5	59.8354	68.8316	1.15902	0.000214241
Solyc05g014280	8.36348	2.14103	2.77318	0.685206	1.76469	0.55408	2.68095	0.469778	-2.08575	1.65e-05
Solyc05g015160	0.0857	0	0.10573	0	0.0431537	0	0	0	-6.13589	0.0353252
Solyc05g015800	0.910356	1.0192	0.820168	0.0676917	0.0230357	0.211438	1.36188	0.240407	-3.80015	0.0114667
Solyc05g025780	0	0	0.296904	0	3.87842	0.455645	0.00868367	0	-8.17452	0.000965773
Solyc05g041220	0	0	0.191419	0	0.308679	0.260451	0.217598	0.161108	-6.77735	0.00397891
Solyc05g050380	12.9806	15.8626	1.67784	3.88615	0.771787	0.604589	1.32639	1.86921	1.13079	0.0135196
Solyc05g050700	1.88599	2.26695	134.185	6.4836	1270.3	353.142	1.00422	3.61064	-4.60441	0.0250911
Solyc05g051080	0	0	0.989409	0	4.16682	0.604859	0.0134413	0.0190083	-8.89134	8.14e-05
Solyc05g051240	56.5972	68.0659	46.9008	98.1304	29.1586	22.8057	15.409	28.3333	1.00782	0.00212461
Solyc05g052030	16.6323	24.0355	3.89629	12.5267	5.59302	8.12372	2.728	6.19583	1.56172	4.64e-05
Solyc05g052670	1.07502	7.77333	0.0328963	1.46638	0.084035	0.491363	0.0344417	1.15132	5.21415	0.00566491
Solyc05g052680	1.13518	3.47162	0.249238	1.48134	0.120246	0.152201	0.04797	0.132173	2.49317	2.04e-05
Solyc05g052950	2.74563	0.132136	1.11875	0.0685417	1.38394	0.613322	2.15353	0.871329	-4.16572	6.95e-05
Solyc05g053120	3.38313	1.14613	6.17384	1.6706	1.0529	10.2449	11.0576	9.72907	-1.94939	0.00059772
Solyc05g053570	0.536749	0.512805	1.51763	0.50525	2.86129	1.1191	1.34312	1.59731	-1.75915	0.0171813
Solyc05g054090	44.1112	27.3134	140.741	14.6707	118.295	305.612	287.721	288.587	-3.28144	5.1e-12
Solyc05g055400	31.9922	31.6305	13.8689	30.2001	24.9635	11.7601	3.44565	5.07604	1.01969	0.000210889
Solyc05g055900	0	0	3.01129	0.0168273	17.3156	3.92874	0.209054	0.252171	-7.67002	0.000214389
Solyc05g056030	3.81669	2.54265	16.7702	8.74569	17.1431	9.12618	13.4143	16.2009	-1.08065	0.0331535
Solyc06g005280	0	0	0.203985	0	0.703608	0.336688	0.116772	0.240797	-7.44104	0.00886595
Solyc06g005930	0	0	0.872378	0.025959	6.50141	1.60542	0.209074	0.168399	-5.1987	0.011934
Solyc06g005960	0	0.00766167	1.44121	0	0.83081	0.066857	0	0	-10.4606	0.00128225
Solyc06g007140	3.68772	3.47418	1.57587	3.81079	3.32396	0.562316	0.0898057	0.383833	1.18863	4.26e-05
Solyc06g007370	16.476	23.4732	6.15054	13.4649	3.30971	5.58753	1.49942	3.21126	1.04141	0.000425304
Solyc06g007530	3.60891	3.35931	5.04747	2.54644	2.96687	6.88019	13.2523	10.7714	-1.05544	0.00113819
Solyc06g007610	10.7633	9.4503	77.4125	25.0729	117.485	258.142	396.519	255.402	-1.68807	1.14e-07
Solyc06g008030	12.3335	16.9339	1.75935	5.08143	1.39716	3.24359	4.11076	6.40198	1.45838	0.004576
Solyc06g008580	2.56103	1.60159	0.252935	1.28255	0.12209	0.021266	0.0927507	0.091561	2.27372	0.0330439
Solyc06g008650	0.38875	0.137075	0.756032	0	14.4295	1.3849	0	0	-7.43636	0.00188372
Solyc06g009110	8.03536	6.37569	3.63136	1.24961	27.6672	11.4137	7.7921	7.47143	-1.67938	0.00763654
Solyc06g009190	74.7841	99.035	40.5078	104.896	6.73102	25.3304	12.6026	24.6624	1.30431	4.38e-09
Solyc06g009900	0.906798	0.882693	3.53984	0.783544	9.94142	5.1877	3.88757	3.80284	-2.33469	0.000440022
Solyc06g010170	3.90323	3.26633	12.7787	3.96905	38.2262	14.6485	12.3084	10.4112	-1.88152	0.0142474
Solyc06g010250	1.56142	2.14457	8.91517	3.90111	62.8037	17.6959	12.9392	11.3436	-1.31282	0.000660327
Solyc06g034140	0.518885	0.665211	2.90158	0.952992	0.974782	2.92929	6.35308	5.04364	-1.65262	0.0172259
Solyc06g034200	0	0.012193	2.15025	0.0110467	21.807	1.60401	0.0861567	0.023662	-7.25946	4.69e-12
Solyc06g035790	0.581935	0.788986	1.9257	0.338821	8.84401	3.07154	0.498407	0.587312	-2.70074	0.00467739
Solyc06g036060	1.70545	2.06091	4.08528	1.47778	21.535	5.25786	4.61567	4.95592	-1.63023	0.0200412
Solyc06g036290	92.16	11.7795	133.332	32.694	277.877	43.6348	176.749	33.3969	-2.13595	0.0027219
Solyc06g048570	13.2248	7.8281	7.2846	3.35411	49.4863	13.8796	17.1634	13.5314	-1.19176	1.53e-07
Solyc06g050560	2.43883	2.79508	4.80721	2.06963	1.01871	3.85927	9.0845	9.14107	-1.24344	0.0393868
Solyc06g050760	117.134	189.694	39.3615	89.4581	10.7142	50.5775	36.6943	53.6848	1.10187	1.08e-11
Solyc06g050900	13.3651	11.6503	5.00286	2.33655	34.677	25.3187	0.472732	1.15021	-1.17009	0.000105354
Solyc06g051950	0.172728	0	1.32226	0	7.84751	2.24679	1.27342	0.178803	-9.28437	1.13e-06
Solyc06g051970	0.854338	1.06303	2.52656	1.24981	4.38117	4.12001	5.56148	5.61206	-1.13088	0.0387981
Solyc06g053220	11.2064	19.0984	0.557413	2.29101	0.255	0.861402	0.500873	1.01195	1.93454	0.0235281
Solyc06g053420	1.46487	1.14654	2.74988	1.41915	9.35303	2.30431	4.33103	3.50738	-1.03163	0.000210889
Solyc06g053720	1.46806	1.20486	4.08536	1.20124	1.62377	6.89252	11.9726	11.9349	-1.82885	0.000174138
Solyc06g053870	16.3569	18.1588	4.38629	12.8515	3.79318	1.10199	0.047676	0.0406137	1.49174	5.88e-06
Solyc06g053950	9.4126	14.0705	3.24558	8.2029	0.442906	6.62583	1.90019	3.9084	1.27246	0.0103217
Solyc06g053960	4.79242	7.07733	2.24206	5.70957	0.14057	3.60918	1.68983	2.96465	1.30471	0.0372076
Solyc06g054030	0	0.008395	2.37841	0	2.92311	0.561671	0.032605	0.0746523	-9.66734	1.97e-05
Solyc06g059710	78.4264	100.013	29.1001	77.0032	0.89964	1.81824	0.0273713	0.111894	1.35937	0.00875087
Solyc06g060640	47.8011	33.2969	2.94137	24.7627	4.58654	0.722233	0.141848	0.27904	2.93798	6.35e-13
Solyc06g060760	26.2742	24.4015	1.67687	8.45822	2.68769	49.8961	5.90411	9.85662	2.24995	0.000199531
Solyc06g062380	3.00326	3.43436	0.406776	1.41455	0.181592	0.208184	0.118781	0.224861	1.71196	0.00566491
Solyc06g062560	0.084455	0.142879	1.49274	0	14.6363	1.02885	0	0.019801	-9.24492	5.08e-07
Solyc06g062690	0.26072	0.516247	6.91384	1.08055	92.91	17.7959	1.88598	2.37729	-2.9001	0.0011818
Solyc06g062730	0.0494777	0.0492697	0.967474	0.0232457	4.65048	1.242	0.18558	0.168737	-5.62033	0.0158267
Solyc06g062930	0.360485	0.496205	4.49593	0.612503	189.231	6.52104	1.04823	0.70114	-2.86985	2.61e-05
Solyc06g063040	0.914541	1.13902	7.34102	2.42237	6.14567	9.61759	9.24948	7.80374	-1.76253	0.024301
Solyc06g063380	0	0	0.790579	0	3.4485	0.270076	0.101604	0	-9.07131	6.78e-06
Solyc06g064500	43.264	53.8245	16.3225	39.7893	11.4533	9.69092	4.1602	5.55104	1.22845	0.00211012
Solyc06g065660	0.335286	0.281804	0.956583	0.0445247	3.56864	0.869591	0.158869	0.183222	-4.56789	0.00639765
Solyc06g065670	3.97649	2.61742	4.11611	0.588312	18.9983	14.0724	7.71543	9.99903	-2.99397	1.62e-05
Solyc06g066420	18.3825	22.1206	2.76713	10.8435	0.647232	3.21478	0.081448	0.876321	1.87644	0.020278
Solyc06g066750	1.45883	0.730408	34.7628	16.4847	8.24256	25.8293	81.8335	52.9953	-1.17207	0.000225746
Solyc06g068350	0.190607	0.137823	1.37859	0.31859	0.123204	1.32358	3.51038	2.44722	-2.12709	0.0476006
Solyc06g068580	0	0	0.684024	0	9.45559	0.678351	0	0	-8.14483	2.31e-05
Solyc06g068620	41.7388	98.1323	25.7703	64.2951	3.99411	46.2395	13.7378	28.3091	1.28597	0.00972125
Solyc06g069110	0.0998197	0.0614637	1.70649	0.603709	20.7089	2.08892	3.6242	2.04365	-1.56249	0.0324518
Solyc06g069230	2.45691	1.71374	5.25045	2.6389	3.21329	4.83364	9.57937	8.08439	-1.0899	0.00358318
Solyc06g069260	0.033454	0.0291117	6.06224	0.623017	31.8774	12.7872	0.237475	0.598211	-3.46803	0.0114667
Solyc06g069550	0.748155	0.746221	2.2957	0.348238	1.43784	5.58565	15.2411	12.125	-2.76303	1.39e-08
Solyc06g069880	0.0839287	0.14204	4.75519	15.9201	2.26255	0.961447	0.0166267	0.0842443	1.59209	0.00453643
Solyc06g071090	0.0797307	0.062981	0.264396	0	0.95933	0.296874	0.648587	0.681752	-6.61551	0.00931995
Solyc06g071570	0.0811357	0.0570063	1.54506	0.76999	1.35015	0.43281	0.452126	0.240066	-1.06575	0.0333211
Solyc06g071830	3.74728	2.93883	0.235615	1.28673	0.312146	0.729821	0.450191	0.392752	2.4235	0.0289488
Solyc06g072450	0	0	0.977167	0	3.03505	0.556528	0.070385	0.017324	-7.91061	0.00438348
Solyc06g072840	14.0684	12.1728	65.4083	25.0977	57.4019	15.2463	11.1961	8.04013	-1.48325	3.45e-05
Solyc06g073560	18.9876	19.843	4.2224	11.4877	0.415647	0.670207	0.692287	0.984715	1.40281	0.00936019
Solyc06g073580	0.936491	1.27891	1.22	2.63945	4.88532	1.62266	0	0.014138	1.03998	0.0233079
Solyc06g073710	1.67852	2.25596	1.35132	3.06809	0.526939	1.07251	0.720783	1.25599	1.09253	0.00663985
Solyc06g073760	4.55456	3.78152	16.4167	5.42057	128.404	22.3153	13.5216	13.8155	-1.76101	0.00254101
Solyc06g073820	0.447307	0.404378	1.49424	0.344979	12.2319	2.95167	1.96131	2.20701	-2.27614	0.00519838
Solyc06g074120	59.2591	57.5925	6.33045	13.2154	6.38323	2.96617	2.37339	4.26749	1.00927	0.00240595
Solyc06g075840	0	0	0.517261	0	3.06204	0.748869	0.0157407	0	-8.25536	0.00126835
Solyc06g076020	184.961	68.6033	97.8973	45.5607	100.595	35.3534	97.9944	35.2559	-1.18741	0.000195462
Solyc06g076160	3.5215	2.51601	1.34852	3.33518	0.299714	0.653401	0.0490567	0.0810047	1.26239	0.0460908
Solyc06g076210	0.184842	0.195264	1.8666	0.385278	3.5236	4.26258	6.9436	7.83682	-2.38838	0.000119588
Solyc06g076560	19.4874	13.4518	27.8588	12.8803	18.2551	10.9804	25.2072	7.95428	-1.1748	0.00025942
Solyc06g076870	0	0.14315	14.6039	0.485855	88.3709	42.7881	67.6725	40.5491	-4.88185	0.000756181
Solyc06g076920	18.9206	19.768	6.16836	14.442	0.743911	0.510704	0.0141953	0.0786427	1.17767	0.0188819
Solyc06g082330	0	0	0.140649	0	2.72707	0.124905	0	0.0154287	-6.15151	0.0358032
Solyc06g082340	0.0104457	0.026483	1.32941	0.0312907	11.4285	1.56579	0.241412	0.130929	-5.42226	5.88e-06
Solyc06g083140	0.0373327	0	8.40166	1.1923	44.3892	52.1585	27.1013	33.444	-2.84664	5.5e-05
Solyc06g083270	22.8399	15.5259	41.9217	18.8152	67.37	38.093	28.3561	18.1003	-1.30448	0.0139469
Solyc06g083320	0.0214813	0	1.13891	0	3.70792	0.728386	0.026152	0	-7.83973	0.0408798
Solyc06g083470	3.16806	5.07987	4.80032	1.15619	69.7773	10.2717	0.793434	0.68302	-2.23339	0.0419028
Solyc06g083710	0.416867	0.407079	1.73309	0.427838	5.08861	3.56252	6.58253	5.99967	-2.09151	4.86e-08
Solyc06g084370	5.3178	6.42681	1.52151	5.54033	2.36543	4.1952	0.662523	0.674738	1.76909	0.0498705
Solyc06g084600	3.36322	3.22813	25.5218	1.62369	239.754	23.4272	4.52035	3.09883	-4.17046	2.25e-06
Solyc06g150133	64.0433	32.9232	195.241	14.6645	54.0888	46.897	190.674	32.4673	-3.72305	0.049979
Solyc07g006410	8.232	11.8537	3.1992	7.3318	0.830128	2.10396	1.17218	1.65332	1.10993	0.000958657
Solyc07g006770	0.337991	0.499091	0.102643	0.36438	0.0363677	0.201784	0.159718	0.189642	1.69778	0.0307567
Solyc07g006840	0	0	1.10422	0.009399	14.2825	0.495279	0	0	-6.57826	1.35e-07
Solyc07g006855	6.50658	4.57947	3.25082	7.72418	0.081023	0.192819	0.0260707	0.020463	1.17523	0.00198508
Solyc07g006870	31.316	29.0524	9.18189	25.2219	0.214279	0.527654	0.0777253	0.089399	1.40674	0.000409937
Solyc07g007240	4.85069	4.95203	4.54166	12.7656	0.390982	0.215492	0.0870433	0.0761937	1.36139	0.00579456
Solyc07g007290	1.26897	0.689356	3.90998	1.56488	0	0.129713	0.112008	0.128522	-1.43304	0.0171813
Solyc07g007730	0.0809203	0.0336983	0	0.638965	1823.11	242.634	9.82564	27.975	7.13685	0.00295629
Solyc07g007920	0.529743	0.480948	0.862651	0.316176	0.709005	0.782037	1.74584	1.46039	-1.5278	0.00110004
Solyc07g008205	0.784864	0.806724	1.50924	0.337005	0.595489	0.989192	2.02774	0.599012	-2.20212	0.0443605
Solyc07g008430	0.403359	0.425573	41.5797	9.98132	178.018	142.487	104.125	88.1265	-2.15538	4.9e-10
Solyc07g008620	2.8632	3.39857	0.296075	0.988468	1.08814	0.799238	0.478446	1.41694	1.61376	0.00452876
Solyc07g017950	0.191636	0.18556	7.67396	1.11048	47.7493	16.693	2.41464	4.72329	-3.01174	0.0109871
Solyc07g040750	1.06533	0.93081	2.70518	1.0342	31.9523	3.21098	1.86834	1.38953	-1.42966	0.00306289
Solyc07g041720	4010.26	6574.41	578.985	2198.84	7.0621	103.349	106.408	137.591	1.90397	0.000216141
Solyc07g041760	2.37912	1.76553	2.95972	1.55828	5.09776	4.38847	6.787	6.30707	-1.02863	0.00983945
Solyc07g042560	2.53281	2.68643	4.76958	2.40157	4.02937	5.06433	8.71971	8.97168	-1.03968	0.0204108
Solyc07g043660	0.980949	0.995833	0.601162	1.77981	0.674003	0.139699	0.00743133	0.00994867	1.48519	4.97e-05
Solyc07g044960	0.805136	0.850609	2.85221	0.416472	4.14524	1.25286	0.292092	0.451792	-3.01186	0.0234514
Solyc07g045550	0	0.0173377	0.53043	0	0.0514493	0.621366	2.30296	1.41461	-7.83258	0.018297
Solyc07g047740	4.62504	4.96291	1.58949	3.90637	0.60386	0.0380463	0.0371437	0.0539183	1.23886	0.0285943
Solyc07g048110	1.37089	1.73054	2.91565	1.08476	6.74876	3.64946	4.6072	5.49029	-1.60319	0.049979
Solyc07g049420	0	0	4.20298	0.079646	42.6365	2.32012	0.152068	0.0401113	-5.57893	6.31e-05
Solyc07g049690	141.446	169.864	28.403	59.071	62.2251	40.497	26.6498	29.8225	1.01244	0.0188354
Solyc07g052190	0.0304847	0.0928627	1.1142	0.0359843	6.60684	0.718064	0.0703147	0.0611247	-4.87778	0.00836326
Solyc07g052380	0.0626693	0.0192553	1.32676	0.468352	2.59142	12.5769	17.3364	24.2112	-1.56387	0.00036249
Solyc07g052510	0.553059	0.685422	11.2792	30.6813	7.49615	39.1903	7.1685	12.9623	1.37028	2.24e-07
Solyc07g052960	0.138429	0.096309	0.49968	0	0.137766	0.0389807	1.3523	1.33833	-7.92731	0.015329
Solyc07g053300	0	0	0.50294	0.0199373	0.187746	3.66954	5.65826	6.55595	-4.47897	0.00741927
Solyc07g053320	5.19416	5.90279	15.5892	4.20091	23.2246	9.32386	13.5781	13.3814	-2.12158	0.0320368
Solyc07g054280	31.3641	34.8549	11.6111	25.3584	0.432639	0.688191	0.0781277	0.140521	1.08685	0.0373535
Solyc07g054580	15.6308	14.1894	3.2689	8.14782	0.233057	0.378972	1.51792	1.05123	1.23917	0.00053345
Solyc07g054690	7.27711	7.3778	18.5205	8.95689	9.54714	20.7306	28.0726	28.7114	-1.11211	0.000837671
Solyc07g054880	10.0072	12.6041	3.94877	11.2922	0.312256	0.0934893	0.0191263	0	1.46203	0.0011118
Solyc07g054900	14.4736	14.6811	6.19471	14.8156	0.12844	0.125995	0	0.0112077	1.20201	0.0145225
Solyc07g055180	10.3105	7.93192	32.7597	14.0135	12.1966	58.3678	105.766	84.8434	-1.28027	7.44e-05
Solyc07g055470	21.5721	26.5333	4.69957	14.8635	0.43473	0.816568	1.14736	1.24062	1.56052	1.42e-06
Solyc07g055640	3.32074	3.84088	0.264917	0.742696	0.0128403	0.0992367	0.026391	0.0835513	1.42041	0.0070185
Solyc07g055910	1.03876	0.842932	5.20808	1.91889	11.982	18.1904	20.8144	26.8584	-1.53266	6.95e-09
Solyc07g055920	0.186409	0.0547637	26.4513	3.41523	35.7674	210.806	230.586	252.517	-2.96699	9.48e-08
Solyc07g056130	0.0485963	0	2.79092	0.0681033	45.9304	5.27223	0.216794	0.0206737	-5.34336	1.08e-06
Solyc07g056400	9.0139	9.70238	5.06737	11.2734	1.011	4.21391	3.9595	5.54878	1.06253	0.0330439
Solyc07g062480	7.5173	11.5982	0.897273	2.50253	0.014821	0.0815273	0.028632	0.0642713	1.42225	0.0155169
Solyc07g062630	0.0229817	0.016165	2.02501	0.0109193	3.07519	0.23447	0.0255823	0.115218	-7.51802	0.0350546
Solyc07g062840	1.22087	0.56886	4.27693	0.508482	11.0384	8.82281	14.3636	8.22871	-3.09717	1.46e-10
Solyc07g063180	1.34539	1.36835	5.24366	1.04352	16.8797	3.75563	2.70265	2.31512	-2.53633	0.0153242
Solyc07g063410	13.2123	25.1783	8.14593	24.3775	5.47013	15.7372	2.30739	6.12044	1.49412	8.98e-07
Solyc07g063420	0.238338	0.374108	2.83255	0.802389	106.15	11.6535	0.69769	1.09503	-1.95088	0.035347
Solyc07g063970	4.4585	4.01232	5.84003	2.83967	1.99935	10.7901	14.7913	14.9373	-1.08693	0.00956502
Solyc07g063990	0	0	0.748966	0.00766267	3.99337	0.843485	0	0	-6.87763	0.000565901
Solyc07g064070	0	0	0.332398	0	2.71142	0.186276	0.0616343	0.0226067	-7.70854	0.00408187
Solyc07g064450	0.0502997	0.011391	0.39096	0.0113757	13.9078	1.15309	0.25049	0.200051	-5.2787	0.00536553
Solyc07g066250	0.011969	0.0214777	0.574895	0	0.281699	1.27705	3.62346	2.23466	-8.18421	1.94e-05
Solyc08g005240	2.25054	1.66547	7.46019	1.92036	38.668	7.28259	3.63273	4.85955	-2.17158	0.0136272
Solyc08g005245	5.03076	4.61743	7.45772	2.05807	37.7992	9.72427	4.53168	4.20341	-2.02147	0.0105315
Solyc08g005630	18.6305	19.3827	10.5143	25.0666	17.9393	12.9906	4.24411	5.31743	1.16802	1.61e-06
Solyc08g005680	48.2108	58.7507	18.0581	50.0313	0.389225	0.619368	0.0189123	0.120362	1.42304	0.0162865
Solyc08g005710	16.583	16.2926	2.89007	6.90492	0.165682	0.22572	0	0.0177787	1.20884	0.00591705
Solyc08g006765	17.9022	74.6612	1.90224	22.2182	0	0.541056	0	0.2213	3.51054	1e-08
Solyc08g006770	70.8913	156.083	42.658	129.787	3.56621	24.4411	5.20427	19.3181	1.55563	2.97e-07
Solyc08g008360	1.3477	1.47382	5.66312	2.08222	0.830874	7.58785	18.0722	18.0587	-1.47903	0.0136272
Solyc08g014000	32.3315	10.1116	20.7969	1.8231	0.158019	33.9188	130.269	86.5958	-3.51169	0.0119857
Solyc08g016770	3.78993	4.42035	0.437819	2.23036	0.017782	0.0116247	0.099693	0.0477107	2.24345	2.83e-05
Solyc08g062340	56.8704	15.5305	45.563	10.1655	20.478	6.44909	43.7117	7.12485	-2.27803	3.26e-05
Solyc08g062437	21.8701	2.76935	32.4583	7.9136	24.8452	8.15549	56.0595	6.01985	-2.12084	9.2e-05
Solyc08g062940	5.38219	6.18391	17.6576	6.27026	5.71629	17.2567	32.4962	33.7832	-1.5108	0.0281588
Solyc08g065910	0.45815	0.357831	1.72751	0.134774	0.564323	6.86395	13.442	8.50004	-3.5963	0.00541157
Solyc08g066350	0	0	1.85525	0	11.4899	1.53497	0	0	-8.85468	3.64e-05
Solyc08g067160	2.28126	2.07159	7.99899	2.4206	5.01708	9.5837	21.2022	17.0838	-1.75307	0.00347481
Solyc08g067570	0.166385	0.290613	1.05399	0.102957	5.46942	0.499285	0.237829	0.143316	-3.46967	0.0472483
Solyc08g068000	0	0	0.420064	0.0105463	1.19471	0.372377	0.043956	0.10749	-5.27541	0.0155868
Solyc08g068150	86.9162	82.4471	23.3957	50.2361	11.7949	10.735	13.1525	14.2288	1.01235	2.88e-07
Solyc08g068450	0	0	1.70597	0	21.1673	1.20072	0.121406	0	-7.90856	0.0158925
Solyc08g068717	0	0	0.805562	0	2.3474	0.316029	0	0	-7.80399	0.00425809
Solyc08g074490	6.29035	6.81101	1.22167	3.22071	0.192453	0.728468	0.254574	0.274637	1.34085	0.0224971
Solyc08g076010	0.691908	0.723548	1.56578	0.308741	1.62881	1.83454	4.87952	3.35953	-2.42098	0.000257837
Solyc08g076250	0.41912	0.31464	9.58294	3.58371	135.97	111.344	59.8705	82.2256	-1.55705	0.00199757
Solyc08g077330	21.9605	49.0439	0.810558	8.49522	0.376615	0.760835	0.427207	0.924251	3.17775	0.00646032
Solyc08g078330	0.275584	0.604573	0.0320953	0.458162	0.029878	0.535196	0.449385	0.859521	3.64416	0.033144
Solyc08g078620	0.26479	0.436289	3.5105	0.189485	7.6696	2.65819	1.0146	0.910144	-4.3665	0.000216417
Solyc08g078700	85.6327	25.3598	105.102	24.4838	103.874	26.7492	123.492	18.2836	-2.21064	0.000135866
Solyc08g078890	0.288206	0.258366	1.15153	0.053974	0.119323	2.71776	8.86579	4.51158	-4.19099	0.0018846
Solyc08g078910	0.145229	0.0680797	1.1325	0	1.98239	1.0957	4.42082	1.5246	-7.54858	8.14e-05
Solyc08g080540	27.8457	10.1698	18.4057	8.56805	25.0886	9.5079	31.1198	14.0363	-1.20183	0.00635419
Solyc08g080590	97.3007	126.464	18.1383	75.9392	1.91683	1.09441	0.41352	1.48885	1.95602	1.95e-08
Solyc08g080650	113.181	147.044	0.590468	3.00249	41.91	3.67667	0.013094	0	2.29177	0.00160574
Solyc08g080660	6.82829	9.3024	0.0672437	1.81156	0.125539	1.0919	0.060341	0.445999	4.7474	0.00764358
Solyc08g080670	1.25252	3.20625	0	1.03075	0.05014	0.0378907	0	0.0753663	8.20546	0.00155731
Solyc08g081220	10.3055	8.37712	6.49745	15.1507	19.9826	75.7457	21.0089	34.8416	1.11222	0.000604767
Solyc08g082370	19.6829	21.4251	12.1235	26.907	22.6373	30.189	13.5529	16.4287	1.02141	0.0421501
Solyc08g082630	1.57219	0.978401	12.0869	4.32918	35.476	23.8719	28.4758	24.4501	-1.54194	0.00804603
Solyc08g082680	2.60558	5.60023	1.15704	3.27499	0.603722	1.31919	0.599292	1.29778	1.411	0.000858062
Solyc08g082890	0.458308	0.698971	5.5249	2.32093	10.1591	18.2624	23.7152	21.6242	-1.30663	0.00443285
Solyc09g005120	11.0632	7.00594	12.0156	5.69251	27.484	10.7359	15.5093	7.21857	-1.1316	0.00295629
Solyc09g005730	6.79248	17.6149	0.899659	3.5402	5.77752	4.7102	2.52756	3.37809	1.90642	0.00172586
Solyc09g006005	142.123	184.773	23.14	72.6099	2.51956	1.63774	0.653642	1.12451	1.55088	2.95e-06
Solyc09g008070	0.988974	0.839686	6.49485	1.27617	19.2955	5.00513	3.89814	4.60731	-2.55444	0.00214327
Solyc09g008370	3.33266	4.6521	1.67229	4.58737	0.430183	0.701353	0.533343	0.700584	1.35695	4.34e-05
Solyc09g008620	0.150183	0.329248	1.18376	0.596461	22.372	12.442	1.03394	0.982349	-1.07101	0.0145474
Solyc09g008810	12.2075	12.4744	3.73261	9.46497	0.292327	0.5165	0.257191	0.0947	1.24321	2e-06
Solyc09g008970	36.47	9.47496	76.2564	29.8072	58.5109	28.3031	95.4327	27.8946	-1.43986	0.0364872
Solyc09g009930	0.0956453	0	3.21172	0.0620977	52.9189	8.32121	0.339667	0.166085	-5.86806	0.0038697
Solyc09g010080	0.043535	0.0161243	18.4882	1.42847	108.426	56.0929	102.326	90.5435	-3.84292	3.93e-10
Solyc09g011560	8.50402	8.31133	1.53015	0.233462	15.878	2.87524	0.131423	0.403496	-2.90431	0.0268416
Solyc09g011990	1.74848	1.64542	0.474282	1.20542	0.328447	0.397447	0.257351	0.206064	1.23376	0.0171813
Solyc09g014580	1.07681	4.08951	0.207233	1.56366	0.39624	1.99206	0.0461947	0.0793337	2.77647	0.0281315
Solyc09g014935	0	0	1.03909	0	3.58877	0.551601	0	0	-8.38008	0.000172971
Solyc09g015070	3.15644	0.858405	1.0325	0.167132	0.512704	0.349368	1.79628	0.483069	-2.61491	0.0358032
Solyc09g015380	4.61325	4.99207	0.802041	4.40344	1.17067	0.321293	0.0286917	0.00359167	2.44251	0.0313354
Solyc09g015430	0.0268797	0.0388893	0	0.333847	0.228087	0.134605	0.247577	0.311031	6.25019	0.0281218
Solyc09g018020	27.4713	26.083	1.63384	3.82047	0.0439617	0	0	0.0166883	1.12291	0.000971002
Solyc09g059565	0	0	0.625025	0	2.83074	0.378562	0.892581	0.851903	-8.38992	0.000165114
Solyc09g059950	1.94467	2.12539	13.8329	2.25602	19.4038	5.26569	4.1893	3.35842	-2.84864	0.00358318
Solyc09g061870	0.0839413	0.348944	0.440238	0	0.152454	0.316153	0.624496	0.682863	-6.22893	0.0347108
Solyc09g064230	0.366876	0.479903	5.91483	2.0238	1.26545	6.80062	19.7249	17.4387	-1.56528	0.0214733
Solyc09g064600	1.12402	2.87868	3.41303	0	1.92341	2.68097	5.72723	6.4302	-9.72157	2.11e-11
Solyc09g064610	1.96056	1.7577	0.475679	3.41042	4.05467	1.82667	0.953075	3.637	2.74066	8.32e-29
Solyc09g065620	11.9459	13.0105	3.90983	12.4639	5.80442	7.63696	2.15488	3.25098	1.61908	4.39e-05
Solyc09g065670	0.136506	0.179455	1.46279	0.174247	0.184826	2.18767	7.59323	8.72095	-3.00525	0.0353757
Solyc09g066150	1.01069	1.73304	0.573442	2.46917	0.192744	1.67604	1.25952	1.51342	2.02545	0.0213187
Solyc09g072750	104.408	135.632	5.31501	18.2495	0.479207	0.580064	0.840365	1.85695	1.68557	0.000185414
Solyc09g072753	409.517	585.272	49.8373	175.571	8.80818	5.35374	2.47448	8.02522	1.7167	8.28e-06
Solyc09g075400	5.77556	5.31482	21.2743	5.11949	104.348	15.7888	6.62138	6.38499	-2.26896	0.00566491
Solyc09g075770	0.536274	0.568685	2.60295	1.05835	84.1519	11.2073	2.00436	2.56322	-1.35119	0.00612676
Solyc09g075820	11.9758	21.2464	0.463357	3.01277	47.1872	2.25042	0.719462	0.835184	2.70995	0.0255846
Solyc09g082700	42.102	50.1099	1.91377	7.40046	0.106743	0.073387	0	0.0560147	1.92848	0.0171813
Solyc09g084460	47.9125	27.166	53.8586	26.8869	42.9832	11.2016	6.81815	3.84568	-1.08274	0.000224366
Solyc09g084480	1546.31	557.571	3405.99	1684.95	4192.96	2647.68	2004.49	745.296	-1.10832	0.0201689
Solyc09g084490	805.953	345.435	2514.93	1296.55	2287.52	1145.85	217.988	79.0602	-1.05146	0.00152758
Solyc09g089500	15.1583	6.53775	77.9296	5.19556	16.8407	13.1678	0.37012	0	-3.89847	0.00433398
Solyc09g089530	861.14	276.394	1755	614.114	98.1457	143.95	78.2084	29.8499	-1.57871	7.75e-06
Solyc09g089590	0	0	3.54295	0.011641	0.0223313	4.07617	18.0691	13.0715	-7.82862	4.73e-05
Solyc09g089740	8.33313	8.75684	0.403272	1.32236	0.62583	0.205555	0.0581107	0.110819	1.63748	0.0103217
Solyc09g090090	0.393965	0.346602	3.39561	0.228077	21.2665	3.49983	1.33158	1.16705	-4.08503	0.00127476
Solyc09g090320	2.86654	2.55546	6.57006	2.81738	3.37436	6.67438	11.0045	11.7372	-1.27146	0.00459499
Solyc09g090500	62.9912	74.4813	19.1981	49.708	8.87824	28.7478	33.3235	28.7971	1.34311	0.0171813
Solyc09g090600	0.202342	0.168237	0.703453	0	2.96248	0.376532	0	0.0140833	-8.50093	4.41e-05
Solyc09g090760	0.310157	0.293034	0.859674	0.393816	4.92821	1.82927	2.05255	2.39636	-1.23472	0.0316257
Solyc09g091060	1.65369	2.30255	1.29596	0.274984	0.148071	2.44376	7.17772	7.56082	-2.24564	0.0364872
Solyc09g091400	0.124929	0.159143	0.629031	0.300989	0.708773	1.2587	1.35373	1.51039	-1.13522	0.00959232
Solyc09g091510	183.1	204.627	36.3189	96.4604	83.3422	292.217	76.059	97.389	1.32417	8.51e-05
Solyc09g091540	0.175983	0.306518	1.7291	0.293263	0.31345	0.833068	0.882789	0.66261	-2.67829	0.00256756
Solyc09g091887	0.039957	0.104675	4.67215	1.22705	14.4551	31.9404	30.4906	27.1666	-1.93688	0.0350546
Solyc09g092110	354.343	740.351	80.5784	299.568	12.7757	47.618	22.3854	39.825	1.81824	6.04e-06
Solyc09g092350	0.119609	0.01532	0.607323	0.0146853	0.0286027	0	0	0	-5.05105	0.0141543
Solyc09g092560	13.2221	15.4169	3.60963	11.8636	0.158461	0.29287	0	0	1.666	0.000256679
Solyc09g092725	35.07	38.3127	15.101	35.9421	1.64038	1.11148	0	0.092384	1.20006	0.0368674
Solyc09g092750	76.8634	104.764	49.2793	116.047	2.61942	3.42718	0.155225	0.147661	1.18368	0.0127427
Solyc09g092760	43.7707	50.8512	9.73422	23.309	6.53659	0.568202	0.282518	0.426144	1.13903	0.0247527
Solyc09g097800	94.3136	130.063	45.0329	95.6179	1.31106	2.50572	0.141508	0.448454	1.01849	0.0183491
Solyc09g097930	0.206435	0.496925	1.6341	0.303881	9.81476	1.4779	0.642741	0.469475	-2.61713	0.0172259
Solyc09g098030	45.9691	46.4698	2.43241	5.57083	0.0856637	0.476386	0.09687	0.177486	1.13205	0.0174465
Solyc09g098460	0.00985033	0	0.384669	0	1.08089	0.083337	0.04216	0	-7.92127	0.00103634
Solyc10g005980	0.110442	0.0860667	1.23828	0.123494	5.83497	1.9693	0.744677	0.555696	-3.53738	0.00138129
Solyc10g006940	0	0	368.52	0.635182	3204.2	389.408	5.60383	0	-9.38578	0.000158764
Solyc10g007830	2.9154	1.53665	17.9087	3.06649	1.47818	43.6084	60.0754	65.2369	-2.54017	0.00728735
Solyc10g007870	151.383	167.619	51.1507	128.331	5.78633	1.99952	0.107552	0.321576	1.25713	0.00564624
Solyc10g008180	0.0415043	0.015972	0.77239	0.017816	4.76175	1.50213	0.42124	0.301622	-5.64827	0.000557546
Solyc10g008330	0.146596	0.109792	0.709299	0.122538	24.1803	2.12295	0.22262	0.251547	-2.59246	0.0192766
Solyc10g009400	3.07582	2.83937	16.7848	4.62666	30.7683	8.83347	6.2245	6.434	-2.08739	0.0385985
Solyc10g018120	1.94854	2.09279	1.32719	4.38045	1.01253	1.74924	0.117838	0.248595	1.6367	7.81e-06
Solyc10g018640	0.073586	0.084036	3.06219	0.606297	48.8143	30.1023	0.990346	1.70828	-2.49727	0.00539002
Solyc10g046920	0	0	24.5349	0.0674357	0.228635	4.88908	118.274	71.4529	-8.37346	0.00229405
Solyc10g047030	0.00574733	0.063588	4.2484	0.16728	51.6244	28.4248	42.8756	46.3603	-4.63067	0.0168282
Solyc10g048030	216.71	251.154	68.9251	170.648	4.24849	4.19471	0.116885	0.328209	1.24938	0.0179287
Solyc10g048190	7.91961	6.89746	22.4932	11.6783	14.6908	42.8867	50.4779	40.9904	-1.06757	0.0247969
Solyc10g049420	22.9725	88.0802	43.5297	100.669	1.58874	16.6388	20.5144	19.7905	1.15887	0.0255812
Solyc10g055250	1.14479	1.66918	13.6135	0.482467	11.0601	16.8258	52.1118	35.3192	-4.80443	2.89e-17
Solyc10g055560	2.48529	6.3873	4.77183	1.22923	8.94577	62.1949	47.7712	60.9889	-1.9604	0.0307567
Solyc10g055780	11.3306	14.26	1.83953	4.72288	0.150228	0.534845	0.347024	0.407578	1.27184	0.0226648
Solyc10g074824	0	0	0.715146	0.0160063	17.7502	1.32536	0	0	-5.26274	0.0142509
Solyc10g075050	0.197787	0	10.0522	0.954414	0.183336	8.75126	46.5987	22.8458	-3.3707	0.0193326
Solyc10g075070	515.222	605.328	51.5172	154.306	2.18186	244.695	11.0516	21.6868	1.47126	0.000281221
Solyc10g075103	35.4511	46.3432	24.7557	1.02185	0	351.095	324.94	265.126	-4.58518	1.39e-10
Solyc10g075118	4.5699	4.21181	209.031	694.454	29.8698	5509.05	677.651	1207.47	1.62545	6.1e-07
Solyc10g076500	0.547954	1.19313	0.07889	0.392412	0.00627533	0.0152247	0.0396317	0.057	2.12094	0.0446083
Solyc10g076660	3.52164	5.14124	2.76981	0.637063	3.15352	1.25435	0.752351	0.253034	-2.16366	0.000224366
Solyc10g076670	0.169612	10.0164	0.276866	8.13136	0.485235	0.48478	0.815476	0.657781	4.85828	0.0192064
Solyc10g078200	0	0	1.47103	0.057283	15.1535	1.21135	0	0.0521863	-4.73172	0.00500988
Solyc10g078440	24.2731	27.6279	1.48846	7.87927	0.186735	1.15667	0.618932	1.25586	2.26212	0.0018846
Solyc10g078500	10.449	10.3618	87.5649	24.6865	186.489	71.3121	28.0785	29.2132	-2.0522	0.0362689
Solyc10g079060	0.0788337	0.048338	4.29979	0.272684	256.984	10.2033	0.280365	0.214296	-3.94997	0.00612263
Solyc10g079210	0.244972	0.177537	0.716991	0	3.8151	1.47926	1.43193	1.6936	-9.15094	3.51e-09
Solyc10g079360	4.45594	5.14698	11.9141	2.26645	54.2847	13.5083	3.83934	3.54926	-2.61531	0.00596861
Solyc10g079460	4.67888	5.66864	1.07709	2.31169	4.34398	2.31367	0.578524	1.29113	1.02454	0.0272864
Solyc10g079640	12.272	7.54351	20.121	9.11568	16.0945	10.5217	18.8868	11.5912	-1.18214	0.0482945
Solyc10g079860	38.0439	51.7704	5.92212	23.7847	1.81422	1.03161	0.07398	0.386228	1.89339	2.42e-05
Solyc10g080430	0.571352	0.475303	6.2071	2.75837	5.85004	9.78123	14.8972	13.7946	-1.23025	0.00100333
Solyc10g080600	3.41442	3.11195	0	0.528705	0.522292	1.16532	0.170029	0.137401	7.15438	0.00564624
Solyc10g080620	44.0795	58.5982	0.528751	4.08224	1.26489	1.0306	0.39042	0.612556	2.7915	0.00117266
Solyc10g080670	20.9677	32.9586	0.662734	4.3111	0.399465	0.633493	0.0570503	0.316486	2.57667	5.61e-07
Solyc10g080840	36.0102	35.4837	8.59702	23.6541	0.387679	0.369861	0.0295293	0.0853733	1.39172	1.25e-05
Solyc10g081300	5.08908	6.06147	1.82825	3.95017	0.194055	0.474801	0.241889	0.464577	1.05088	0.0136014
Solyc10g081490	9.72964	9.13279	2.00916	6.41969	21.3403	2.73996	0.0130317	0.041772	1.59801	0.000164449
Solyc10g081560	6.93426	5.57311	11.2824	3.50824	248.256	60.4612	6.07071	6.43762	-1.87385	0.0413543
Solyc10g081670	0.248493	0.0626867	0.563239	0	4.99516	0.0870217	0	0.0950757	-6.3971	0.0385985
Solyc10g081760	0.113576	0.110024	0.38196	0.0746553	4.81738	0.565348	0.23833	0.362197	-2.41957	0.0390288
Solyc10g082020	0.497994	0.585528	1.89712	0.214032	26.9311	5.80716	0.684168	0.581146	-3.27082	5.35e-05
Solyc10g083140	43.018	47.6581	17.1159	38.056	5.63565	5.36844	9.58931	7.45834	1.04314	0.0307567
Solyc10g084170	26.3818	6.60625	30.1434	9.47	38.9299	10.36	23.9477	6.55269	-1.73709	0.000532523
Solyc10g086180	157.904	81.5276	220.557	89.7444	244.248	118.261	126.989	110.291	-1.46593	0.0166737
Solyc10g086370	0.230476	0.125224	2.12454	0.0490033	12.0622	0.794362	0.0842453	0.13455	-5.47999	4.27e-08
Solyc10g086450	0	0	4.06943	0.11221	9.33502	5.36747	0.111123	0.54987	-5.41075	0.00358318
Solyc10g150102	5.12073	3.50704	7.08943	3.671	3.51219	8.75747	5.9655	4.46994	-1.04818	0.0248652
Solyc10g150147	0.221405	0.124826	0.089157	1.28999	0.54306	1.13452	0.092354	0.540846	3.86771	0.0332751
Solyc11g005100	0.00510933	0.119768	0.547877	0.0609107	3.86414	1.23626	0.139364	0.197329	-3.33063	0.0178769
Solyc11g006230	24.3567	16.1991	7.89608	0.560176	3.39247	11.7031	44.4578	26.5081	-3.81448	1.06e-06
Solyc11g007250	1.40825	1.33227	1.09765	3.34442	0.111217	0.560879	1.04597	1.57676	1.48264	0.0313299
Solyc11g007390	0.829047	0.703375	3.68993	0.503046	31.3464	3.13581	0.0599377	0.081875	-3.0245	0.00567482
Solyc11g007410	3.45623	4.61452	0.977358	2.29005	0.294287	0.27478	0.170661	0.28034	1.10394	0.0213642
Solyc11g008230	0	0	2.37065	0.132324	37.3246	3.18733	0	0.0338063	-4.13359	0.0470739
Solyc11g008630	52.7898	45.4156	11.4318	30.1251	3.4065	2.92427	1.46046	2.4333	1.32834	7.78e-08
Solyc11g010120	0.986346	1.13577	39.4325	20.3027	12.0443	48.1461	58.4481	43.806	-1.04154	3.45e-08
Solyc11g010880	0.0637497	0.029148	0.776362	0.00674733	4.31152	1.0378	0.121247	0.323324	-6.35808	0.00681453
Solyc11g010980	0.888465	1.58475	4.50874	1.54978	0.0281033	1.94491	1.66809	0.758642	-1.61537	0.00884691
Solyc11g011000	4.21668	5.25348	7.27072	3.26822	30.7431	13.0679	16.175	18.2018	-1.22689	1.18e-05
Solyc11g011300	0.274379	0.113905	2.88178	0.672711	11.5727	8.89223	0.0787397	0.162951	-2.31373	0.0278435
Solyc11g011880	4.07829	4.51809	3.01284	7.04114	0.881444	1.20174	0.741603	1.45066	1.12521	0.000588738
Solyc11g012130	101.086	57.6701	331.064	175.167	138.902	299.919	264.079	201.996	-1.03251	0.0162396
Solyc11g013330	1.52961	2.13899	2.16318	0.694856	17.9876	2.31058	1.87666	1.55705	-1.75956	0.015329
Solyc11g013560	0.103699	0	1.2122	0	4.67244	0.500319	0.118038	0.0896953	-8.37011	2.35e-05
Solyc11g018590	0.0262233	0	0.638807	0	28.402	9.00546	0.120478	0.0697527	-6.76685	0.00811513
Solyc11g020330	4.47017	1.70138	5.04132	1.77607	3.87868	1.87412	12.2773	2.77584	-1.5578	0.0171813
Solyc11g061940	0	0	0.887777	0.023414	5.57584	0.912621	0	0	-5.35032	0.0275902
Solyc11g062030	3.66377	3.08974	7.17739	1.33421	29.4615	11.8898	28.0877	25.9797	-2.53487	0.00810158
Solyc11g065310	0	0	9.31953	0.272134	9.33635	24.5764	46.0635	33.8237	-5.01075	1.29e-06
Solyc11g065600	30.5231	41.9885	4.28882	11.7503	0.368145	0.468753	0.0562683	0.0779033	1.40474	0.0106347
Solyc11g065630	0.0449973	0	0.514004	0.0927817	0.739138	0.548244	1.93944	1.3992	-2.46998	0.0137433
Solyc11g066100	24.2212	3.48014	32.0693	6.94641	48.7162	13.3112	54.4168	12.4251	-2.28796	0.00026477
Solyc11g066420	0.133314	0.197044	0.0994027	0.791591	0.017227	0.013163	0	0	2.70856	0.0316214
Solyc11g067170	7.28942	9.2856	1.59767	6.01137	0.171487	0.107325	0	0.060178	1.8279	4.31e-10
Solyc11g068970	0.0149133	0.0900593	0.926077	0.0296923	1.27989	1.99298	1.78816	1.11598	-5.00229	1.53e-07
Solyc11g069770	7.3393	8.86965	2.50158	5.7484	0.980742	20.727	7.40391	9.01271	1.11675	0.0120054
Solyc11g069890	0.164667	0.117702	1.45535	0.04132	0.490849	1.61817	7.18716	7.95268	-5.08916	0.0052482
Solyc11g070150	0.406913	0.284772	7.84158	0.148657	11.3757	1.61878	0.0186537	0.0596983	-5.91892	0.0213184
Solyc11g071290	33.9265	25.7228	3.19202	1.026	0.9547	7.07815	14.156	9.59893	-1.65635	0.0228625
Solyc11g071600	0.503721	0.485459	0.078752	0.302846	0.0426347	0.0178163	0.00388167	0.00765633	1.84977	0.0403219
Solyc11g071830	23.3399	4.76032	35.054	10.5819	47.3269	19.7714	63.4732	14.4	-1.78445	0.000141986
Solyc11g072230	0.492065	0.485523	4.68357	0.775109	59.4343	8.57511	2.36503	2.2029	-2.81664	0.0216558
Solyc11g072670	0.205439	0.184267	2.99791	0.277612	22.2279	5.94143	0.358037	0.499487	-3.65891	0.0107271
Solyc12g005360	0.0660427	0.0356367	2.62504	0.093352	13.3177	1.77255	0.153781	0.052329	-4.97218	4.97e-05
Solyc12g006973	10.3989	3.15786	1.09847	7.23704	7.68066	9.44379	17.1613	27.2971	2.65333	0.00285768
Solyc12g008670	0.151198	0.06117	2.49428	0.168771	18.0904	4.71188	0.0471887	0.161142	-4.02359	0.00340153
Solyc12g008800	79.36	55.5982	2.19263	0.54959	0.0677513	5.48994	16.0459	10.0299	-1.99758	0.0228812
Solyc12g009800	32.7243	53.3809	18.4919	45.9445	66.5448	29.97	25.322	35.408	1.24648	9.39e-05
Solyc12g010170	0.360693	0.555823	4.42738	0.882717	38.2223	5.36634	1.04535	1.09812	-2.52849	0.00538902
Solyc12g010480	2.40541	1.9468	3.65975	1.73643	1.74823	5.33553	8.65361	9.21043	-1.14327	0.00634443
Solyc12g010780	0.0348483	0.0229547	1.2352	0.0109293	6.92521	1.26517	0.251432	0.0633067	-6.98204	0.00402057
Solyc12g013620	3.87579	6.97621	0.374895	3.60742	1.25098	2.56733	0.10035	0.951517	3.16329	0.00154139
Solyc12g013820	0.785345	0.62592	8.72308	2.14851	38.4219	23.2439	38.5625	30.8191	-2.11346	6.07e-25
Solyc12g014530	6.93629	3.59845	4.326	2.07071	13.255	13.0288	16.4933	15.9306	-1.14987	0.000135785
Solyc12g015790	0.308662	0.495092	2.40674	0.396615	14.7677	1.68041	0.225515	0.286643	-2.59725	0.00491803
Solyc12g017530	17.0158	28.5044	4.02123	21.9023	5.50957	25.943	4.06603	26.7603	2.29845	2.01e-05
Solyc12g017820	0.040043	0.0832257	0.26313	0	8.83509	1.59366	0.036523	0.0985317	-7.27144	0.000351993
Solyc12g039070	15.6639	20.4726	1.49779	8.67587	0.785858	0.400986	0.0721933	0.114271	2.44496	2.82e-09
Solyc12g039080	0.900354	0.581245	0.414151	1.57955	0.206176	0.258997	0.154877	0.262295	1.87745	0.00496269
Solyc12g041890	0.136855	0.0236043	2.65302	0.856364	3.97916	5.9213	10.3889	7.38027	-1.67145	0.00198508
Solyc12g042350	0	0	1.32463	0	7.04261	1.01335	0.0471723	0.203922	-9.22981	8.28e-06
Solyc12g042460	2.11586	2.83968	2.85042	0.662644	92.5639	2.58779	0.254887	0.486388	-2.27325	0.00515398
Solyc12g042480	1.91749	2.72592	0.723242	1.62312	0.163272	1.45586	1.02752	1.63185	1.06913	0.035902
Solyc12g042760	6.55931	5.65764	2.71054	6.91879	0.780469	1.33642	1.74972	2.046	1.28103	0.000616504
Solyc12g042770	214.781	345.996	38.4135	83.0305	8.89647	19.0977	14.0562	17.0984	1.05782	0.000284615
Solyc12g044270	1.70174	1.07267	0.384301	1.17262	0.181879	0.289303	0.308706	0.383479	1.55215	0.0385985
Solyc12g044620	1.69631	2.14835	3.72039	1.89874	2.29725	3.82295	6.13262	5.61459	-1.05131	0.000929689
Solyc12g056040	0.114712	0.100535	2.88259	0.222609	20.1968	3.81612	0.311797	0.203776	-3.9455	0.00174549
Solyc12g056700	2.60432	3.2035	0.413685	1.48135	0.068824	0.0163477	0	0	1.7251	0.0261702
Solyc12g088310	2.89524	3.32449	4.69031	2.23924	8.68055	8.45929	12.9911	17.2503	-1.10332	0.0373666
Solyc12g088460	11.0919	11.0589	4.73479	10.8225	1.30087	1.07684	0.664453	0.856603	1.12718	0.013346
Solyc12g088510	1.04199	1.58315	0.242775	0.994973	0.025316	0	0	0	1.9687	0.00925156
Solyc12g088800	0.372876	0.276995	0	0.211441	0.208129	0.0848817	0.088688	0.0137127	6.87956	0.00271003
Solyc12g089220	7.6007	8.77395	2.31162	6.88582	6.18507	10.5746	4.08932	6.56567	1.49449	0.000846988
Solyc12g094460	0.952086	1.01898	3.39703	0.417358	24.9724	6.06441	0.187822	0.429298	-3.23999	0.000343358
Solyc12g096400	0.0193803	0.015182	0.933243	0.0350067	6.06961	0.402333	0.0203687	0	-4.78425	0.008079
Solyc12g096430	0.512303	0.341734	1.56811	0.289713	11.248	3.09727	0.783087	0.506975	-2.64957	0.0281588
Solyc12g096570	8.28931	30.5806	0.811356	7.92829	0.273447	9.22876	0.863221	10.911	3.10462	7.21e-06
Solyc12g096770	121.017	49.156	101.435	45.9081	39.6969	43.6843	33.6593	22.5513	-1.25484	0.000163787
Solyc12g096780	180.046	59.9867	267.028	132.814	181.001	218.743	213.412	155.374	-1.08384	4.19e-06
Solyc12g096790	4.16247	1.14131	30.1411	11.2824	18.0266	104.509	43.4337	41.4589	-1.47856	0.00453643
Solyc12g096800	0.165817	0.113024	0.518962	0.124618	0.561113	1.24739	0.52602	0.475048	-2.10985	0.0330439
Solyc12g098200	0	0	5.2053	0.390989	5.80741	32.918	36.8656	42.9151	-3.94058	5.13e-05
Solyc12g099340	1.66695	1.85629	2.67244	1.34079	8.04488	3.17999	3.23338	3.46768	-1.12025	0.024301
Solyc12g099720	0	0.0257953	0.082588	0	0.465854	0.0747807	0.011201	0.033167	-6.22474	0.0413543
Solyc12g100180	10.7598	10.2669	2.54041	6.49925	0.4229	1.15265	0.551745	1.02936	1.31655	0.00579959
Solyc12g100280	12.3093	14.4154	4.80936	11.6235	1.7627	0.557176	0	0	1.18249	0.00685558

## Sheet: Table S8
Table S8 Differentially expressed genes in WT-30 versus ms-30 in stamens
	FPKM
GeneID	SE_WT-30	SE_ms-30	PE_WT-30	PE_ms-30	ST_WT-30	ST_ms-30	CA_WT-30	CA_ms-30	log2FoldChange(WT-30/ms-30)	padj
Solyc00g014790	0	0	0	0	0.17418	0	0	0.0214507	-6.11225	0.00849471
Solyc00g020010	0.223662	0.0665563	0.174697	0	2.0477	0.269756	0.729235	0.155237	-3.07406	0.0180011
Solyc00g500032	0.810227	0.88722	0.407649	0.226072	0.77203	0.165286	0.149843	0.271174	-2.3682	0.0300257
Solyc00g500063	11.8261	11.8491	3.13904	3.65873	2.23049	1.22134	1.11013	1.11272	-1.0902	2.57e-06
Solyc00g500077	0.688583	0.936368	0.40076	0.253064	0.777778	0.176171	0.162192	0.24663	-2.28654	0.0387034
Solyc00g500087	0.0781537	0.0546603	0.116047	0.001092	0.197309	0.0355197	0.0397907	0.0131257	-2.50341	0.0168776
Solyc00g500103	0.032341	0	0	0	0.464338	0.00578133	0	0.0232113	-5.75012	0.000277439
Solyc00g500358	0.146178	0.137217	0.194331	0.0692663	0.81459	0.176495	0.126291	0.126252	-2.38252	0.00353469
Solyc01g005010	16.1115	17.9778	17.667	17.0136	3.87689	18.2383	15.8903	17.1695	2.00788	4.75e-20
Solyc01g005130	5.9507	5.25698	2.35509	2.70005	4.40652	12.7006	11.016	13.8975	1.32957	2.33e-06
Solyc01g005160	0.829788	0.475894	0.194724	0.0103743	0.675074	0.0532283	0.139256	0.0210747	-3.83936	0.0167748
Solyc01g005220	1.31144	1.5113	0.413861	0.86735	1.2357	0.476228	0.115348	0.253348	-1.58761	0.000412717
Solyc01g005310	0.003542	0.0153083	0.00158733	0.0458153	1.63981	0.111038	0.0577233	0.0463103	-3.98093	6.74e-05
Solyc01g005370	4.36963	5.16934	4.45207	5.65388	20.4568	4.1535	1.32465	1.68972	-2.54814	3.54e-11
Solyc01g005400	6.85052	6.06776	2.96859	4.17016	6.05716	1.52511	0.93545	0.989423	-2.21998	1.38e-05
Solyc01g005410	21.9228	22.6166	0.142754	1.0536	0.0695367	2.46728	1.17676	2.66163	4.91243	6.38e-06
Solyc01g005420	31.5594	34.7569	8.45411	13.2002	0.14072	1.61698	2.48745	2.12317	3.36452	0.00396241
Solyc01g005450	8.90167	9.81239	2.09462	2.39339	2.21646	1.11383	2.20219	1.98643	-1.21372	0.00187224
Solyc01g005460	12.2152	11.4569	21.667	20.7941	9.16277	24.4515	28.8445	24.6816	1.19459	1.34e-08
Solyc01g005470	40.4761	60.9034	20.8156	43.3155	4.12027	22.0012	15.8963	15.7692	2.22603	6.41e-12
Solyc01g005550	60.3479	66.1204	108.777	124.057	27.4119	116.65	163.678	193.281	1.87061	7.51e-36
Solyc01g005630	0	0	0.0226923	0	2.25204	0.062153	0	0	-5.35758	1.36e-07
Solyc01g005650	0	0	0.134818	0.0394367	7.11194	0.592614	0	0	-3.84259	2.39e-08
Solyc01g005760	7.98654	8.26782	1.63408	2.58438	0.0272757	3.95664	1.04758	1.70343	6.96758	8.41e-45
Solyc01g005920	2.63674	2.20321	1.98248	0.880918	37.7884	3.62627	2.03006	1.87573	-3.66427	5.1e-05
Solyc01g005985	63.5303	54.5598	112.719	135.545	66.5663	267.733	316.059	326.914	1.80601	1.23e-17
Solyc01g006020	91.9892	169.18	52.0546	103.544	24.0272	68.2699	45.1564	60.4106	1.32542	3.49e-05
Solyc01g006190	36.4684	36.9897	30.4561	29.1104	24.5791	58.296	71.2222	71.066	1.02522	1.93e-08
Solyc01g006320	26.1562	28.3619	57.781	86.218	2.14694	30.8898	19.4181	18.7719	3.66554	4.07e-20
Solyc01g006330	24.2422	28.5041	4.68626	7.5148	6.96594	2.4538	2.86436	2.34465	-1.75199	4.87e-06
Solyc01g006390	1.57091	0.861262	26.0387	12.3402	62.708	154.668	208.461	107.76	1.10758	0.00174015
Solyc01g006440	0.312439	0.139373	0.192505	0.335005	21.1479	2.15115	0	0.0179183	-3.5674	0.0173118
Solyc01g006460	0	0	0.008803	0.0156073	0.943771	0.178646	0	0	-2.63363	0.00133333
Solyc01g006540	43.7459	55.878	11.7685	36.8272	0.365661	45.7495	16.9971	26.5981	6.77743	3.93e-60
Solyc01g006580	0.140209	0.130483	0.0182027	0.0225207	0.00843767	0.789362	0.324426	0.33286	6.04686	4.3e-07
Solyc01g006660	2.61909	3.31807	0.305074	0.76427	0.675158	0.230475	0.489349	0.526434	-1.7502	0.00707736
Solyc01g006690	14.3405	15.8272	13.3174	21.8183	2.24098	7.22075	7.40334	10.6704	1.47548	3.09e-10
Solyc01g006730	0.201049	0.079414	0.180004	0.0193783	2.54247	0.618465	0.141496	0.0590357	-2.21644	0.0191817
Solyc01g006880	2.6322	2.58262	2.65989	2.4184	7.26715	4.13091	6.61432	9.25369	-1.02122	9.05e-08
Solyc01g006930	4.24095	4.70453	2.2823	1.71599	0.999474	3.4382	5.63422	5.56821	1.57443	1.9e-05
Solyc01g007030	25.9448	17.6278	0	0	0	0.309479	0	0.0958437	6.67497	0.0362548
Solyc01g007170	1.76193	1.70609	4.81143	2.69494	1.04263	4.65548	8.33052	7.93992	1.94097	2.13e-19
Solyc01g007190	4.32321	5.2651	4.23802	3.32257	30.1258	5.32543	3.14941	3.55256	-2.77174	6.31e-09
Solyc01g007200	0.700015	0.543739	16.4349	6.77895	7.51206	46.564	79.6552	66.3119	2.40686	1.09e-28
Solyc01g007230	14.986	15.8115	29.5893	23.6313	71.7995	32.7836	23.5706	23.5024	-1.38024	6.66e-06
Solyc01g007240	0.0710357	0	0.219412	0.0210517	0.393033	0.0628307	0.146732	0.143893	-2.8492	0.0365343
Solyc01g007780	2.73361	3.01629	2.17873	2.63342	4.85554	2.33391	2.10829	2.00337	-1.28221	0.0017215
Solyc01g007790	8.25849	8.31318	14.5249	12.3304	27.3449	14.5995	13.5855	13.4858	-1.11328	1.56e-08
Solyc01g007800	3.29695	3.07401	15.3711	15.1813	2.1201	6.1806	9.72323	6.58769	1.31161	0.000311159
Solyc01g007810	3.24836	2.22945	17.2696	20.8152	1.93034	4.85473	5.84392	5.80227	1.11994	0.0195808
Solyc01g007870	2.7141	1.95541	17.2774	22.2999	8.08608	73.0344	53.5258	52.7417	2.96968	2.92e-41
Solyc01g007950	3.07613	2.62903	4.55018	3.37321	48.5938	5.809	4.31991	3.59441	-3.31049	1.33e-26
Solyc01g008070	27.1078	30.8414	17.2911	20.6309	59.8356	14.1625	10.6435	11.0756	-2.31766	3.84e-19
Solyc01g008080	537.424	588.41	880.274	919.586	358.757	894.011	693.79	602.063	1.09587	2.22e-09
Solyc01g008100	41.9144	42.2884	93.4501	61.7857	236.065	75.6655	37.3988	38.6639	-1.8868	2.14e-10
Solyc01g008220	1.8107	1.27853	2.12998	2.4575	9.53803	3.15043	6.01432	6.88034	-1.81228	3.61e-13
Solyc01g008230	62.2892	53.9318	101.373	107.754	22.9531	54.5574	67.6041	74.5182	1.042	2.38e-06
Solyc01g008440	7.11683	6.48852	5.45871	5.75681	14.6677	8.03596	7.8245	9.68752	-1.07476	2.32e-11
Solyc01g008450	0.074566	0.165804	0.04397	0	0.565141	0.095582	0.076369	0.0558323	-2.78643	0.00986973
Solyc01g008490	5.43457	5.64642	5.76464	5.71294	13.9572	7.64892	8.38965	8.57154	-1.11047	0.000210546
Solyc01g008540	0	0	0.286309	0	0.016105	0.631931	2.9273	2.67252	4.88063	0.00084255
Solyc01g008610	0	0	0.03424	0.0365397	0.039938	9.28649	12.2098	18.8541	7.58795	9.11e-22
Solyc01g008620	6.99391	5.27358	0	0.0310767	0.132512	0.907794	0.193324	0.264449	2.57346	0.00407201
Solyc01g008650	0.0560653	0.0499933	0.156788	0.0773057	0.0686647	1.6494	0.99207	1.12049	4.2779	3.06e-16
Solyc01g008670	15.8868	16.7054	6.60677	16.8467	2.38921	0.74508	0.051597	0.0840647	-1.88341	0.000125531
Solyc01g008740	0.00760867	0	0	0	0.505638	0.013672	0	0.0146243	-5.28023	2.76e-05
Solyc01g008800	2.10503	2.4012	1.12697	1.54206	2.90285	1.46178	0.782831	1.01781	-1.19503	4.51e-06
Solyc01g008830	7.70115	9.02182	3.24364	4.36539	3.71669	0.432595	0.642707	0.87847	-3.39031	1.31e-06
Solyc01g008880	0.00648667	0	0	0.0567357	0.837788	0.0577187	0	0	-3.85435	0.000778087
Solyc01g008910	4.10551	3.72901	5.36977	5.30751	4.20782	10.2392	8.76104	10.8319	1.05477	5.44e-06
Solyc01g008940	12.4044	13.8909	0.565622	0.530619	6.47382	1.33284	0.234421	0.528214	-2.46748	0.000529704
Solyc01g009040	15.9855	16.8841	46.5894	31.3341	13.8211	54.7428	78.2848	73.8624	1.7791	7.37e-46
Solyc01g009070	4.13918	3.75594	2.72322	2.58949	24.0012	7.06242	9.82051	10.09	-1.97029	1.53e-20
Solyc01g009200	8.79183	12.493	6.97807	13.9604	1.92657	6.11508	3.85532	5.5508	1.45314	3.73e-06
Solyc01g009220	5.86814	7.47275	4.95598	8.67272	0.750946	2.1302	1.62167	1.94978	1.28526	0.0136132
Solyc01g009240	0.470095	0.406395	10.7301	1.09396	33.1091	6.15729	0.0828623	0.403925	-2.67175	0.0287343
Solyc01g009245	37.9411	45.19	21.222	32.6458	6.01307	14.9281	8.89477	10.2453	1.10184	3.12e-07
Solyc01g009270	0	0.049196	0	0	0.036841	0.819557	0.314922	0.991182	4.19562	0.000563927
Solyc01g009340	5.56229	6.12311	10.009	9.11946	1.85731	6.33198	16.5386	13.146	1.53908	3.65e-07
Solyc01g009350	0	0	0.703627	0	3.58	0.841471	0	0.031221	-2.27309	0.000159448
Solyc01g009430	62.6615	83.7827	19.1459	43.421	3.94315	12.0517	4.954	15.6585	1.40664	1.94e-09
Solyc01g009440	0	0	0.195524	0.064378	2.84107	0.757936	0.778551	0.478755	-2.07518	0.0115347
Solyc01g009490	0	0	0.079596	0	0.820016	0.0349503	0	0	-4.67785	0.00318342
Solyc01g009590	0.574939	0.312594	3648.66	25.9437	16047.1	3155.11	12.7709	14.587	-2.59829	0.0376715
Solyc01g009720	0.763373	0.738106	0.560339	0.754509	0.033027	1.05729	1.3845	1.26485	4.54998	2.32e-05
Solyc01g009870	1.0494	0.357489	0.792277	1.64548	0.073904	2.57191	2.96676	3.06994	4.82801	1.36e-16
Solyc01g009920	0	0	0.070165	0	3.13536	0.33799	0	0	-3.45758	1.19e-05
Solyc01g010020	3.77753	3.06261	11.7026	15.5562	7.22366	3.80625	1.2158	1.3929	-1.12766	0.000352805
Solyc01g010030	7.88444	6.65281	6.62173	7.45373	2.39629	6.55006	12.2567	12.5397	1.2338	3.06e-09
Solyc01g010065	0	0	0	0	0.661349	0.0109477	0	0	-5.99932	0.000339876
Solyc01g010080	0.199442	0.254342	0.285906	0	5.76007	0.195961	0.0109873	0.0470743	-5.05094	1.65e-05
Solyc01g010180	64.4493	83.7003	27.4559	37.0675	4.04591	23.1766	6.15094	8.90659	2.27642	1.76e-10
Solyc01g010240	0	0	4.0952	0	0.069231	6.78649	13.3067	8.66554	6.34888	3.86e-19
Solyc01g010250	12.9631	10.62	17.6182	13.7371	4.7583	44.2138	42.0146	35.1073	3.00243	6.03e-77
Solyc01g010390	7.5307	9.02955	9.18218	9.52492	562.24	32.82	5.75901	5.85791	-4.35934	7.76e-23
Solyc01g010410	0.06838	0.041973	0.0351333	0.0393033	2.54032	0.365956	0.161219	0.181097	-2.97075	0.00105517
Solyc01g010430	2.37334	1.65255	5.12804	2.96547	21.8739	10.4958	4.7969	5.35517	-1.26582	2.88e-16
Solyc01g010480	17.5104	35.1363	0.335661	1.7917	0.460552	2.26685	0.926475	2.09213	2.0818	8.17e-10
Solyc01g010530	0	0	1.84424	0.237525	36.4018	2.17173	0.0162573	0	-4.35255	0.00012735
Solyc01g010590	23.3353	23.0879	36.34	38.0189	20.8621	57.0332	46.8066	46.2477	1.23915	2.76e-27
Solyc01g010600	0.34728	0.317568	3.96652	0.676358	0	8.09663	24.9792	19.6965	11.4964	7.93e-19
Solyc01g010740	0	0.018492	0	0	0.860159	0.0464557	0.018732	0	-4.3354	2.2e-05
Solyc01g010900	0	0	389.747	0.925289	627.697	87.2529	0.675433	0.432982	-3.08313	0.0123435
Solyc01g011050	0.721038	0.4715	1.59192	0.318481	9.72749	0.326302	0.0127453	0.105616	-5.03864	0.00809148
Solyc01g011105	4.08347	5.64087	5.14244	7.18681	0.382017	2.42906	4.54806	4.39131	2.36516	0.0038173
Solyc01g011356	0	0	0	0	0.877535	0.0189173	0	0.0666363	-5.57552	6.66e-06
Solyc01g011510	23.1473	23.106	44.1795	62.0321	29.71	7.02834	4.14108	4.22323	-2.33869	1.95e-10
Solyc01g014100	3.31416	4.31216	6.53404	1.91757	0.850212	28.3399	41.7531	40.696	4.81336	3.23e-52
Solyc01g014250	3.53651	5.26426	2.51739	1.99409	24.8409	5.63973	9.89183	10.4546	-2.34967	5.82e-24
Solyc01g014373	4.13602	2.90761	2.52989	2.44812	2.57871	1.14215	2.3489	2.27667	-1.4469	0.0125859
Solyc01g016380	0.110957	0.234927	0.0554133	0	7.20163	2.0713	0.205404	0.267526	-2.03143	0.0396897
Solyc01g016390	0.0750123	0.0975653	0.0229753	0.0127737	6.60402	1.56453	0.08316	0.153217	-2.27762	0.00988982
Solyc01g017565	0	0	0	0	0.161009	0	0	0	-5.82564	0.0237695
Solyc01g017600	116.263	153.244	63.0496	75.0693	123.651	64.3253	12.5415	14.459	-1.18562	1.48e-05
Solyc01g020130	0.265579	0.213168	0.829321	0.801024	0.305039	1.4941	2.10434	2.26337	2.08824	0.000453845
Solyc01g021685	0	0	0.182579	0	0.996358	0.063229	0	0	-4.01575	0.0189871
Solyc01g021730	0.093038	0.0709137	2.7521	0.401379	8.11679	1.69519	0.767651	0.968487	-2.4588	6.99e-10
Solyc01g028800	0.143755	0.190364	1.10667	0.465232	11.9218	4.34254	2.69441	3.52326	-1.65978	2.11e-11
Solyc01g028807	32.0487	40.7046	4.36521	12.6672	0.206179	1.05785	2.05047	4.08897	2.09194	0.0160057
Solyc01g044340	1.38619	1.13977	3.09677	2.69299	6.78887	3.62534	5.56585	8.05173	-1.13325	0.00238702
Solyc01g044420	0	0.0322083	0.104205	0	0.301621	0.028666	0.036786	0.009712	-3.42523	0.010532
Solyc01g044520	0.0500807	0	0	0.093644	0.0175667	2.90655	1.04458	1.1396	6.87129	7.25e-09
Solyc01g049880	15.0673	23.0691	6.32279	13.8163	2.02654	5.73389	7.91219	12.6387	1.29452	0.000243024
Solyc01g056220	0	0	0	0	0.136184	0	0	0	-5.66557	0.0462161
Solyc01g056580	0.112664	0.176528	0.034666	0.0860507	2.83504	1.06507	0.206101	0.248631	-1.59081	0.00360114
Solyc01g056850	5.79301	4.02012	15.3516	8.73351	61.0752	30.2113	37.9663	32.2427	-1.23619	4.12e-12
Solyc01g057220	0.0480337	0.133794	0.140146	0.153176	0.00643	0.187361	0.0255463	0.101304	4.62313	0.0145922
Solyc01g057270	0.218799	0.286698	2.69871	0.422955	18.4126	4.84461	1.1856	1.28756	-2.12259	0.0473776
Solyc01g057785	0.134498	0.081123	0.23833	0	0.849613	0.0868163	0.223748	0.090234	-3.21603	0.0283202
Solyc01g058030	0.0236327	0.0211157	0.888238	0.0860473	0.277616	6.87664	6.09678	5.6196	4.34464	4.92e-11
Solyc01g058040	0.038997	0	0.494754	0	0	5.15921	5.25308	4.65201	9.54833	4.07e-12
Solyc01g058225	0	0	0	0	0.284423	0	0	0	-5.99488	0.0181866
Solyc01g058250	0.0167157	0	0	0	0.104325	0	0.0347177	0.0377987	-5.65429	0.0346617
Solyc01g058520	0.519935	0.397096	46.6177	3.4985	462.189	90.681	1.01052	1.3849	-2.58775	0.0114713
Solyc01g058720	17.86	11.2716	5.53823	4.44149	73.409	27.0966	10.5315	8.78755	-1.70606	0.000421254
Solyc01g059900	0.468211	0.313678	0.330625	0.823962	1.38278	0.342919	0.0644057	0.414483	-2.15564	0.00544396
Solyc01g059940	0.0290127	0.046145	0.018898	0.0497567	2.03661	0.310938	0	0	-2.99211	0.00585008
Solyc01g059950	0.0304067	0.0232147	0.101901	0.124656	2.43839	0.224144	0.031748	0.18402	-3.69721	1.04e-06
Solyc01g060050	0.92559	0.843037	1.64822	1.32259	3.86062	2.09942	4.33901	5.78949	-1.0932	6.21e-05
Solyc01g060070	6.36564	6.9088	8.03169	7.42484	90.8453	35.4392	11.4017	10.8251	-1.54922	0.00367237
Solyc01g060180	37.5518	37.65	12.7056	15.7866	4.41964	11.138	10.6055	11.5235	1.11342	1.95e-09
Solyc01g060200	0.0986357	0.165417	0.163337	0.0789993	1.10645	0.472409	0.66758	0.857037	-1.46343	0.026933
Solyc01g060410	4.61141	4.7765	7.27203	3.93376	2.18129	8.29385	19.1573	18.4801	1.72603	2.87e-19
Solyc01g060420	0.880093	1.85781	1.43198	0.214274	0	0.361658	7.87211	7.28726	6.35636	0.00804097
Solyc01g060450	2.30702	2.6956	1.73615	3.2976	0.285957	1.44435	1.28696	1.29906	2.13651	0.000944047
Solyc01g060460	0.115299	0.0225737	0.148259	0.074848	1.17157	0.216064	0.273494	0.338702	-2.67927	0.000207216
Solyc01g065680	2.2436	2.60047	2.64993	3.54205	2.87537	7.57643	10.5086	16.7634	1.1905	8.8e-05
Solyc01g065987	0.00194467	0.0241603	0	0	0.420483	0	0.00504733	0	-7.32368	0.000522466
Solyc01g066040	1.19265	3.88917	0.208994	0.59897	0.0614287	2.85825	0.136716	1.36454	5.24828	4.04e-07
Solyc01g066160	0.23097	0.108714	0	0.270496	0	1.58321	0.0419133	0.161981	7.49726	2.07e-05
Solyc01g066260	0.023416	0	0.0633463	0.132527	0.226211	1.05513	0.0603427	0.122817	1.96611	0.0469887
Solyc01g066420	0.617898	0.317391	1.22821	0.277702	15.6321	0.36651	0	0.01455	-5.53546	0.00233281
Solyc01g066440	31.2708	45.626	50.0004	67.6115	11.0437	43.017	25.4805	28.331	1.76376	1.5e-17
Solyc01g066450	1.2927	2.41144	3.127	2.09609	16.1796	3.57035	4.93738	6.209	-2.43261	7e-11
Solyc01g066457	4.20838	4.33373	3.70464	3.11826	68.9807	14.094	1.4746	1.47634	-2.5248	8.1e-18
Solyc01g066510	0.0454283	0.0548067	0.0144977	0.009152	0.519669	0.202395	0.083278	0.152628	-1.54296	0.000901617
Solyc01g066560	0.144703	0.157821	0.621987	0.399869	2.41937	0.89483	5.30183	5.73649	-1.61881	0.000522039
Solyc01g066570	2.53938	5.86305	17.194	5.23229	2.35111	154.048	113.686	138.405	5.82025	0
Solyc01g066620	0.861396	0.871487	3.58124	0.870479	237.54	6.83182	1.23636	1.30667	-5.38792	5.74e-11
Solyc01g066640	35.4151	27.9718	74.1355	78.6261	4.83509	33.5119	47.4652	44.0588	2.58837	5.24e-34
Solyc01g066700	0.691359	0.538541	0.375742	0.1768	17.6073	3.4886	0.425064	0.495016	-2.52221	0.000604828
Solyc01g066730	1.18041	1.01082	1.7588	1.17541	4.39669	2.1131	2.08282	2.21767	-1.25286	0.00154403
Solyc01g066740	22.1125	15.9896	19.2026	24.2612	6.53733	17.2507	27.145	29.5135	1.17958	2.7e-10
Solyc01g066810	0.844667	0.348148	1.86495	0.381349	33.6566	1.56281	0.094815	0.03878	-4.55185	0.0208924
Solyc01g066850	0.657649	0.34568	0.562209	0.0673573	0	0.159863	2.22436	1.65112	6.42892	0.00395779
Solyc01g066970	0.0262853	0.170535	3.69065	5.3973	0.397498	4.50558	11.2124	3.39484	3.29311	1.67e-07
Solyc01g066980	2.48799	3.1985	0.116416	0.546979	0.182367	2.05071	0.147318	0.494326	3.17896	0.000170146
Solyc01g067005	0	0	0.0826543	0.0201103	1.66017	0.491135	0.0337463	0	-1.91031	0.0327547
Solyc01g067020	0.730096	0.609793	23.2047	0.0686323	37.5297	3.18167	0.063059	0.143396	-3.81484	0.00520501
Solyc01g067040	1.66735	1.88502	4.65674	5.10924	2.65193	9.15028	9.44814	10.4052	1.5692	2.87e-16
Solyc01g067295	970.914	1185.28	353.715	876.875	8.75689	39.3744	17.8282	27.4499	1.97045	6.13e-13
Solyc01g067300	0.530253	0.377473	0.182835	0.118244	2.31043	0.386558	0.128328	0.240831	-2.7746	0.0169235
Solyc01g067340	0.077269	0.10338	0.054161	0.112628	2.35464	0.362689	0.28677	0.0519233	-2.88405	5.35e-05
Solyc01g067360	5.6354	5.0362	12.3088	14.3929	11.9578	6.78578	6.66863	6.1678	-1.03332	2.94e-06
Solyc01g067410	0	0	0.110175	0	0.014163	1.75184	2.08539	2.06008	6.67702	6.74e-08
Solyc01g067420	0	0.0183583	0.954352	0.0424677	0.014882	4.20076	10.3809	6.66137	7.64544	5.83e-19
Solyc01g068170	4.53411	4.1666	4.91714	4.46924	13.8065	7.28081	6.98928	7.75038	-1.15819	3.19e-05
Solyc01g068380	1.312	1.13706	0.443388	0.791113	27.6455	2.47093	0.146567	0.31025	-3.63356	0.00321125
Solyc01g068410	0.678811	0.530916	0.112139	0.0270683	9.95655	1.47214	0.312219	0.329471	-2.90668	0.0151704
Solyc01g068500	0.372615	0.411425	1.13651	0.641522	14.8989	4.04699	1.97513	2.84896	-2.09604	1.24e-07
Solyc01g068510	0.0301283	0.0307197	0	0	1.04108	0.077252	0.0720373	0.274117	-3.893	0.0294457
Solyc01g068630	2.13165	3.14139	4.70419	3.97096	71.7105	8.43334	7.43503	6.75023	-3.37094	0.00480907
Solyc01g073680	55.6979	49.4207	42.3688	52.7219	8.9293	25.5384	21.3352	25.8107	1.31737	2.46e-08
Solyc01g073800	0.509568	0.670988	0.0777147	0.0394773	1.12471	0.0580283	0	0.0215787	-4.5396	0.00522499
Solyc01g073910	4.31003	4.09682	6.63099	5.41274	1.01145	7.72149	11.7472	13.1609	2.70909	1.08e-22
Solyc01g073970	23.6411	30.1183	49.7084	52.5532	14.5785	42.028	42.2353	30.8977	1.31273	6.8e-18
Solyc01g073980	0	0	2.02604	0.143966	11.6477	1.2613	0.068785	0.102956	-3.40022	0.00843324
Solyc01g074000	191.956	215.273	476.646	484.397	192.191	493.049	477.207	394.919	1.15419	9.01e-16
Solyc01g074030	181.809	176.617	109.346	192.739	1.52628	19.3097	17.5893	19.1662	3.4929	8.88e-12
Solyc01g079100	3.59698	4.08972	6.11312	3.92432	2.2114	7.12539	10.8348	11.3017	1.47015	9.05e-15
Solyc01g079110	130.833	141.336	349.88	340.864	159.144	422.942	412.794	316.654	1.19662	2.33e-23
Solyc01g079130	0	0	2.65078	0.234638	7.63538	4.30799	5.03426	4.19809	-1.0499	2.43e-05
Solyc01g079150	37.5741	24.0534	10.0507	13.4207	1.20966	15.1825	21.0981	31.4261	3.43641	2.24e-26
Solyc01g079240	34.1616	27.7002	100.141	132.994	162.525	58.4562	45.8608	43.9114	-1.67603	5.62e-13
Solyc01g079260	14.6347	17.6349	5.14418	8.84264	0.477432	8.00777	2.50882	4.83552	3.8522	8.8e-16
Solyc01g079270	0	0	0.186405	0.030422	0.0437607	21.5993	5.4257	11.1101	8.27127	4.51e-22
Solyc01g079360	18.7916	18.1246	14.2067	15.4282	5.64956	14.5491	12.3563	13.6624	1.16169	1.94e-08
Solyc01g079370	0.125765	0.161904	0.175286	0.166754	0.681005	0.092175	0.099339	0.054002	-3.17094	0.000383608
Solyc01g079410	40.0602	25.1318	117.489	67.2376	192.374	103.436	79.9156	66.8529	-1.14016	0.000168088
Solyc01g079470	728.297	1391	26.7832	66.0556	4.06922	13.3024	9.79937	15.1281	1.53338	0.00100662
Solyc01g079550	0.550845	0.641507	34.9562	0.453722	41.6851	5.91229	0.259381	0.424045	-3.07874	0.00844765
Solyc01g079570	7.6668	6.26525	12.3858	10.3118	25.2541	10.557	34.5169	33.7704	-1.46878	1.1e-13
Solyc01g079580	17.5258	14.8101	37.8665	33.6024	2.27454	48.2987	85.343	84.4455	4.18578	2.32e-87
Solyc01g079610	35.2167	26.7593	43.5062	25.454	83.0536	39.7786	40.78	28.7186	-1.28876	6.95e-12
Solyc01g079620	15.4223	13.8642	8.59593	9.53347	4.44191	11.4453	7.34033	9.43051	1.18771	0.00600663
Solyc01g079700	1.43911	0.886016	2.08677	1.8403	2.66636	1.48999	3.79002	5.23065	-1.05634	0.0166455
Solyc01g079750	6.85873	7.71186	10.9889	8.35537	5.81973	13.8128	22.902	24.744	1.05152	1.52e-05
Solyc01g079850	7.44438	7.28695	3.92712	6.66815	4.47038	10.7989	6.26508	8.0295	1.0706	0.000280038
Solyc01g079890	0.152813	0.0382737	27.8884	1.25069	389.909	45.3815	0	0.400771	-3.38489	0.0120441
Solyc01g079900	0	0	0	0	0.308072	0	0	0	-6.436	0.00344179
Solyc01g079910	0	0	0	0	0.348912	0	0	0	-7.2056	0.00160832
Solyc01g079940	9.62769	7.26175	2.38276	3.49272	3.02838	15.1825	3.8394	11.8965	2.03548	0.00259322
Solyc01g079950	16.0155	21.9565	7.61151	12.4049	1.42655	4.05829	9.46853	10.5371	1.28429	6.8e-05
Solyc01g079980	3.61526	3.72105	6.18902	8.83635	0.44452	10.3538	13.7627	13.3509	4.31753	1.96e-63
Solyc01g080010	6.18793	8.06444	0.853031	2.0559	0.591342	0.0925363	0.053356	0.012874	-2.84516	0.0219614
Solyc01g080100	14.0863	15.2219	14.5707	18.0746	2.68558	10.7866	8.4992	8.65838	1.78343	3.07e-06
Solyc01g080150	5.82542	11.5523	2.70282	3.79341	0.197153	1.60901	6.89069	13.1617	2.74475	0.000464742
Solyc01g080260	0.411753	0.554546	1.55297	0.584535	18.163	1.0382	0.0835547	0.099934	-4.35569	9.53e-25
Solyc01g080410	5.63845	5.59132	1.71623	1.7864	8.94031	3.37553	3.8255	3.80963	-1.60741	5.02e-09
Solyc01g080460	15.592	16.9165	1.63234	3.23044	1.50088	3.50791	3.66504	4.70623	1.0305	0.000859209
Solyc01g080480	0.0669113	0.04105	7.14934	0.007599	36.7741	3.70425	0.0401993	0.00926767	-3.56979	0.00727939
Solyc01g080490	0.1876	0.0229133	0.216076	0.384516	11.5459	1.1774	0.181746	0.325117	-3.50724	2.53e-22
Solyc01g080520	0.0619597	0.0202267	0.00909933	0.008799	0.965704	0.183446	0.00895967	0	-2.55844	0.0354487
Solyc01g080600	81.607	83.2708	237.744	208.663	69.8519	219.016	237.592	172.927	1.43464	1.02e-34
Solyc01g080610	0.237852	0.260619	0.527591	0.283367	3.97869	0.731184	0.319726	0.322928	-2.71266	1.05e-05
Solyc01g080680	0.306022	0.292558	0.379795	0.0568063	1.74234	0.97666	0.035867	0.0591067	-1.05217	0.00154775
Solyc01g080750	31.6825	34.957	75.1772	52.2375	17.8716	81.4762	120.047	99.7644	1.99065	2.46e-26
Solyc01g080820	0.132554	0.033997	0.066292	0	1.15527	0.322823	0.140191	0.0789393	-1.94358	0.0440494
Solyc01g080900	0.532623	0.299081	2.48139	0.401946	0.641507	4.4865	13.0506	9.28697	2.58321	7.19e-10
Solyc01g080910	47.4933	39.6284	68.7281	64.4758	15.4905	72.0907	85.6887	82.138	2.01145	5.6e-36
Solyc01g080920	0.00954667	0.057637	0.032532	0	0.534529	0.0119513	0	0	-5.30194	0.0220494
Solyc01g080950	0	0	0	0	7.82844	0	0	0	-10.327	0.000236838
Solyc01g080990	0.413057	0.569079	0.200384	0.74433	0.65668	0.262529	0.170007	0.299364	-1.51016	0.0217217
Solyc01g081040	2.24367	3.0983	3.08858	1.91618	2.41084	0.717643	0.502599	0.425583	-1.98407	3.91e-05
Solyc01g081080	0	0	0.126052	0	0.619729	0.0829347	0.0218007	0.0536587	-3.05892	0.0185444
Solyc01g081140	0.0153743	0	0.0212987	0	4.87873	0.620697	0.0235117	0.0101657	-3.24093	0.0156487
Solyc01g081250	0.163354	0.17692	0.454195	0.286027	2.74532	0.921524	0.964521	0.388436	-1.79496	2.26e-06
Solyc01g081270	4.71396	5.8537	0.551681	1.06842	1.76464	0.523681	0.160172	0.29078	-2.00074	0.0102003
Solyc01g081290	1.55405	1.45136	1.72902	1.45393	4.40643	2.48384	2.91252	3.58518	-1.06084	2.54e-05
Solyc01g081370	0.109175	0.122369	0.555404	0.709814	0.643664	3.15138	2.66875	3.64013	2.10399	6.42e-05
Solyc01g081420	0.686787	0.373376	1.26306	1.32253	3.5133	1.75453	3.17761	4.51517	-1.20109	0.000588616
Solyc01g081430	5.45795	5.08016	6.28435	4.84561	16.1398	8.82897	11.8826	13.9104	-1.07922	3.32e-07
Solyc01g081530	0.0197347	0	0.16522	0	0.366831	0.0693773	0.0526827	0	-2.36719	0.0262593
Solyc01g081540	5.1532	4.2582	3.5672	3.58416	10.2598	3.92085	6.51241	7.8835	-1.61893	2.77e-10
Solyc01g081600	0.337247	0.263339	1.7254	0.292467	0.207474	42.8728	36.8598	36.754	7.40818	1.5e-40
Solyc01g081620	0.210332	0.286441	0.284671	0.630057	35.7828	2.96287	0.109692	0.262901	-3.82691	1.21e-06
Solyc01g081640	1.03548	1.5506	4.48541	3.68411	1.1319	4.93598	7.36649	7.68046	1.94524	4.1e-06
Solyc01g086640	15.1302	8.22676	15.6452	14.1016	1.22341	5.36793	12.6282	12.7625	1.93811	1.16e-10
Solyc01g086700	1.03415	1.09164	0.242272	0.673046	0.548153	0.051589	0	0.0140753	-3.54644	0.00297492
Solyc01g086790	0	0	1.9222	0	8.68202	0.660741	0.0600807	0.0255223	-3.87169	6.73e-05
Solyc01g086800	88.0986	112.03	183.14	204.602	48.8205	144.425	135.258	108.676	1.35795	2.51e-22
Solyc01g086815	0.022115	0.0894377	1.26817	0	5.22662	0.576009	0.0580147	0.312553	-3.36044	0.000114873
Solyc01g086820	141.078	174.09	453.087	441.367	184.676	488.075	478.468	401.577	1.19991	1.36e-14
Solyc01g086840	0.269256	0.215362	0.231973	0.0278773	6.93356	0.900097	0.169655	0.272096	-3.13241	0.0299473
Solyc01g087000	1.5336	1.35902	0.908663	0.998882	3.13198	1.64428	3.13882	2.31704	-1.13555	0.0207808
Solyc01g087050	1.19784	1.1141	0.335199	0.838465	0.022673	0.48653	0.534802	0.50964	4.05208	0.0134297
Solyc01g087080	7.46024	7.68708	12.065	7.08638	5.97975	14.0234	22.0116	19.3425	1.02371	3.23e-08
Solyc01g087140	2.80552	2.55463	4.87129	3.02759	0.30457	1.77167	6.77129	4.59225	2.33761	8.28e-05
Solyc01g087150	0.936357	0.610004	1.53429	1.71093	1.0065	3.56954	2.76384	2.13954	1.61861	6.11e-09
Solyc01g087180	0.105338	0.256158	0	0.165345	0.0745753	0.923525	0.0252777	0.294847	3.3975	0.0095359
Solyc01g087340	1.95258	1.57356	1.11885	0.904037	3.05561	1.49833	4.13229	3.57801	-1.20886	0.0492491
Solyc01g087390	1.12528	0.667771	1.04676	0.65838	3.15861	1.62745	2.8846	3.51034	-1.15616	0.000545148
Solyc01g087400	5.16133	4.48001	2.71793	1.75819	11.191	6.20111	10.7344	11.3419	-1.05651	0.00137076
Solyc01g087410	1.18189	0.96265	1.17662	0.632654	5.21508	2.54757	3.86494	4.4605	-1.24923	0.00251868
Solyc01g087440	0.401095	0.558097	1.09891	0.806726	9.06648	1.92799	0.781983	1.16237	-2.40731	5.13e-06
Solyc01g087450	2.09919	1.51192	2.42896	1.84912	18.5876	6.33537	2.69893	2.81108	-1.74833	2.33e-05
Solyc01g087500	13.6146	13.9939	28.7236	15.9166	8.50796	28.216	58.2866	64.6285	1.5233	1.45e-36
Solyc01g087540	66.1766	74.2939	47.4117	59.8097	16.2418	37.7635	40.0882	38.37	1.0071	1.6e-12
Solyc01g087660	0.884832	0.693643	0.246849	0.236888	2.88393	0.609753	0.790106	1.03452	-2.49868	0.00645062
Solyc01g087690	6.10568	8.53476	2.23743	4.0504	1.34271	3.09671	2.19139	2.68397	1.02128	0.0324762
Solyc01g087700	0.470482	0.752236	0.345606	0.595565	2.49689	0.866577	0.256567	0.312475	-1.77517	0.0251843
Solyc01g087710	22.6434	28.8759	7.95594	21.0189	0.822049	22.6782	6.78961	7.74724	4.59224	1.64e-26
Solyc01g087750	108.214	105.945	22.1193	23.6469	1.30022	7.30713	3.99219	3.18081	2.25666	3.92e-17
Solyc01g087760	8.75919	10.3856	2.52011	6.32645	0.0568497	1.48572	0.73553	1.54316	4.17749	0.0151999
Solyc01g087770	7.02398	5.98491	3.32997	4.83756	0.208768	2.44851	1.33439	1.93223	3.2738	3.03e-07
Solyc01g087780	30.7677	33.1572	91.3217	162.508	0.86382	5.88443	4.33657	4.32329	2.60791	0.00023742
Solyc01g087820	1.56181	1.57442	0.282901	0.999723	0.0969983	0.342957	0	0.00757867	1.58602	0.0402408
Solyc01g087940	0	0.0646993	0.015281	0	0.00513833	0.674435	0.00603067	0.0246147	6.38348	0.00695812
Solyc01g087950	0	0.0202553	0.014746	0	0.009868	3.17745	0.4671	1.00605	7.70893	0.000129133
Solyc01g087960	0	0	0	0	0.0961543	0	0	0	-6.00245	0.0207953
Solyc01g087970	23.9348	20.2436	17.6421	22.1023	3.89142	1.35443	1.01687	0.872944	-1.72211	6.04e-13
Solyc01g088200	0.269263	0.220095	0.10008	0.097351	0.391972	0.137241	0.279674	0.384088	-1.70319	0.00890371
Solyc01g088360	0.095059	0.0638353	0.112242	0.053087	2.34804	0.236946	0.0362637	0.060224	-3.56506	0.00015587
Solyc01g088400	49.7529	52.3553	143.164	226.154	49.2415	202.004	171.819	202.357	1.86071	6.46e-08
Solyc01g088410	0.267416	0.309453	2.16978	1.5196	49.8805	11.1459	0.47724	0.89131	-2.34895	3.89e-14
Solyc01g088430	45.8563	63.3654	50.9699	48.742	2132.88	97.2857	0.371025	0.604864	-4.72932	6.36e-06
Solyc01g088440	15.5021	16.333	14.8765	23.7153	2.68415	6.4142	4.79947	5.05101	1.03977	0.00545338
Solyc01g088500	2.55714	1.88674	4.19023	2.9107	0.945635	2.80907	5.42643	5.67814	1.3364	0.0055513
Solyc01g088575	0.39098	0.26306	0.031369	0.137337	1.84504	21.9448	8.75962	12.1005	3.35462	3.91e-28
Solyc01g088590	6.28626	6.74606	8.52827	7.99142	17.1253	9.71758	6.80992	7.68644	-1.02949	0.00120856
Solyc01g088620	7.75672	7.17886	13.5591	10.5815	7.0083	21.5861	27.9184	21.6943	1.39592	1.95e-09
Solyc01g088810	1.02175	0.630555	0.590932	0.339442	2.84267	1.0392	0.871588	0.771651	-1.67967	0.00740118
Solyc01g089900	4.0245	3.69509	7.06703	3.84336	25.1163	7.61491	6.72627	6.37678	-1.95259	2.43e-13
Solyc01g089910	3.65894	4.76458	13.902	5.31907	17.7158	49.8253	73.8484	65.9562	1.26136	3.75e-09
Solyc01g089920	0.156539	0.113137	1.15429	0.0840117	9.06063	1.34075	0.199291	0.060324	-2.93202	0.000840807
Solyc01g090000	0.022998	0.081714	0.399404	0	2.02472	0.434644	0.0768697	0	-2.34434	0.031516
Solyc01g090030	0.124388	0	1.43719	0.0215237	7.9435	1.97782	0.0508777	0.098104	-2.17808	0.0350004
Solyc01g090140	0.0686923	0.100133	0.260494	0.538609	0.258058	1.12147	1.25431	1.28077	1.84885	0.048341
Solyc01g090310	33.013	9.61614	11.8091	8.63833	0.309689	1.45223	7.07085	3.16984	1.96619	0.00127202
Solyc01g090340	53.0612	29.9279	93.1024	64.5192	27.3555	63.4514	28.6721	28.0506	1.01186	1.26e-06
Solyc01g090350	0	0.264795	30.1681	1.85236	2159.47	21.4491	0	0	-6.95324	1.15e-14
Solyc01g090460	4.57815	4.95551	5.51665	4.15785	1.88313	5.07691	9.26984	9.85424	1.22894	0.000561085
Solyc01g090530	0.875626	0.571724	0.718095	0.713182	5.1427	1.54273	0.964238	0.608912	-1.93077	6.13e-08
Solyc01g090560	4.78786	5.20877	1.9933	0.900467	1.3629	3.97913	4.36057	4.0676	1.32787	2.07e-05
Solyc01g090590	5.51633	5.30633	5.27616	4.62887	19.9712	7.08604	7.17309	7.97004	-1.73646	6.79e-10
Solyc01g090610	0.0247327	0.116005	0.0372327	0.026913	0.666888	0.103731	0.0235977	0	-2.89348	2.17e-06
Solyc01g090660	0	0	0.0144387	0	0.454943	0	0.0161843	0	-8.8239	1.27e-09
Solyc01g090710	3.25535	3.80136	68.8448	4.0191	632.842	74.9424	1.73293	1.16582	-3.29552	0.00492344
Solyc01g090760	44.8563	41.077	93.2735	130.545	4.82523	32.3873	27.0965	26.3349	2.54184	1.78e-46
Solyc01g090800	2.92355	2.69979	1.13286	1.37115	0.0514103	0.464246	1.07462	0.926581	2.98419	0.0145218
Solyc01g090830	0	0	0.089338	0	0.448045	0.0452077	0	0	-3.43044	0.0473762
Solyc01g090840	3.77008	6.70964	5.75563	7.9565	6.62289	37.4746	25.602	34.5589	2.26789	4.4e-20
Solyc01g090870	1.0906	1.18226	2.5197	2.39372	4.13939	1.23428	0.486665	0.654016	-1.98546	0.000232106
Solyc01g091000	0.176427	0.424219	6.00525	3.00753	0.289244	16.9334	28.5249	26.617	5.64995	2.19e-29
Solyc01g091010	1.8026	0.757022	76.2453	72.3412	67.956	262.83	112.212	117.983	1.75934	2.23e-15
Solyc01g091050	7.52019	14.9589	4.38862	30.4294	14.7437	63.9316	1.08984	19.9134	1.93394	2.36e-10
Solyc01g091160	3.92838	4.45673	4.21961	4.69294	15.4318	8.40333	6.30137	6.65486	-1.07319	6.67e-08
Solyc01g091170	148.783	99.6889	99.9591	42.6241	4.51541	24.5063	80.0599	36.2162	2.23832	1.48e-09
Solyc01g091300	0.134962	0.084341	0.228708	0.0550003	1.97903	0.582743	0.446405	0.562432	-1.93568	0.000101884
Solyc01g091370	10.3608	9.04411	12.9982	12.374	4.14581	27.2833	26.8993	26.4307	2.53691	1.23e-16
Solyc01g091420	0.655148	0.950429	0.494861	0.94655	12.1003	1.08187	0.549708	0.381671	-3.72285	9.72e-09
Solyc01g091540	1.8755	0.607612	2.30821	0.486492	0.724622	3.18323	8.28646	5.91863	1.92131	4.81e-09
Solyc01g091830	5.40103	4.86159	0.344632	0.0424787	2.45454	0.354919	0.606252	0.346595	-3.03341	0.00147332
Solyc01g091840	8.16585	8.51587	15.7021	10.4532	17.2378	141.094	91.712	104.351	2.79401	6.41e-30
Solyc01g091870	0.118402	0.041235	0	0	1.68715	0.0678603	0	0	-4.7752	1.07e-09
Solyc01g093960	23.5514	24.9771	78.4812	102.465	10.2502	53.5164	122.428	115.808	2.1648	1.5e-14
Solyc01g093980	0.0261547	0.055467	0.410667	0.341122	0.356205	3.91385	0.722699	1.37349	3.29265	4.51e-05
Solyc01g094050	1.08345	0.760216	1.64331	1.56129	3.67927	1.9289	5.19798	7.92946	-1.11982	0.000991572
Solyc01g094080	35.4055	38.303	18.6608	24.9199	4.19441	12.4433	11.404	13.0853	1.36464	6.8e-13
Solyc01g094100	0.0343653	0	0	0.0209797	1.01709	0.110076	0	0	-3.46072	0.00782233
Solyc01g094120	0	0	0.105871	0.0499483	1.44344	0.399287	0	0.0114777	-2.04019	0.00167645
Solyc01g094270	0	0	0	0	0.178677	0	0	0	-6.55668	0.00208304
Solyc01g094320	0.215325	0.15848	0.328255	0.224985	22.0474	1.97753	0	0.022903	-3.69788	0.00439652
Solyc01g094570	3.52921	3.59499	3.29996	3.35137	10.9289	4.80137	7.34206	7.15265	-1.42801	1.75e-06
Solyc01g094610	5.44113	6.4245	5.64607	7.49856	0.977919	2.3325	2.90274	3.73968	1.02435	0.0290361
Solyc01g094670	5.87676	6.19205	9.29796	8.3436	44.0199	13.0857	10.8189	11.4078	-2.01232	3.03e-08
Solyc01g094680	24.2476	22.5284	28.9529	26.7201	84.0543	35.3495	41.4453	40.1807	-1.47681	3.37e-16
Solyc01g094690	176.484	164.204	327.076	297.839	54.2366	219.75	262.346	226.547	1.78773	1.11e-15
Solyc01g094700	55.2342	47.5649	93.2581	137.257	63.3027	213.925	100.261	127.081	1.5608	1.59e-10
Solyc01g094870	1.90642	1.5553	7.5899	5.80048	35.6046	17.2857	15.0296	11.868	-1.26811	2.6e-07
Solyc01g094910	1.08608	1.21906	0.0242707	0.112374	62.7022	5.08377	0.15032	0.195677	-3.81045	1.5e-21
Solyc01g094940	32.0562	27.3559	34.3875	35.3438	18.5533	67.3832	76.96	82.1915	1.64596	8.1e-28
Solyc01g094960	5.40585	4.85091	5.56321	5.52479	13.7942	6.78727	7.23297	7.73492	-1.2886	0.00135622
Solyc01g094970	0.360669	0.257902	0.919426	0.013028	33.6699	0.967184	0.136861	0.0553813	-5.41567	0.000471513
Solyc01g094990	0.526003	0.724475	0.657983	1.496	11.8002	0.93701	0.31705	0.507018	-3.96329	3.34e-09
Solyc01g095080	0.0183257	0	0.018798	0.12047	0.0637687	5.55447	2.25903	5.44693	6.27408	8.96e-05
Solyc01g095140	75.0703	82.1332	20.359	37.979	7.48913	24.6451	24.9824	21.3287	1.56106	0.024648
Solyc01g095240	2.02262	2.27165	1.99094	2.58882	8.45136	2.00874	1.25935	1.37394	-2.26922	7.05e-15
Solyc01g095350	0.0985957	0.0475053	0.789943	0.261285	6.5645	1.33607	0.346077	0.568506	-2.5746	0.000114984
Solyc01g095390	2.53785	2.45325	3.08619	3.06981	1.44881	3.57884	5.39299	5.5549	1.08071	3.42e-05
Solyc01g095440	0.0260683	0.0526677	0.0591467	0	2.5978	0.439257	0.0285943	0	-2.73987	0.0197869
Solyc01g095490	11.6491	11.8004	23.149	14.788	42.0054	18.5176	11.2806	10.858	-1.43251	0.000158626
Solyc01g095500	1.21389	1.16033	1.98779	2.80037	7.71449	4.03649	1.02535	1.24582	-1.16674	0.0407009
Solyc01g095550	0.201186	0.169828	0.178837	0.155094	0.773603	0.260781	0.074931	0.051681	-1.7612	0.000664342
Solyc01g095560	3.87361	4.36478	0.863023	0.822841	2.07312	1.15946	0.866279	0.811783	-1.06331	0.0383597
Solyc01g095590	7.18759	6.519	15.0375	11.364	7.20224	17.2217	34.4308	38.1623	1.03438	8.44e-10
Solyc01g095620	83.0855	68.9511	53.2647	65.3142	18.287	55.5238	56.6151	64.8918	1.40133	2.7e-11
Solyc01g095640	3.27071	3.86236	3.78829	2.39741	0.363275	1.86641	4.22819	2.59964	2.06792	0.0185345
Solyc01g095650	4.53775	4.5139	11.3882	6.39533	3.51512	8.72016	19.8485	15.6659	1.09866	8.01e-08
Solyc01g095720	1.46958	1.48976	6.10262	0.946054	96.5536	11.2729	6.55098	7.89797	-3.36912	8.04e-15
Solyc01g095750	1.08268	0.853265	1.51867	1.30419	1.43818	0.799772	1.46009	2.70027	-1.0563	0.00315883
Solyc01g095760	0.111186	0.161112	0.140577	0.182215	0.89641	0.199809	0.254782	0.205123	-2.40329	0.00020158
Solyc01g095780	0.591429	2.83232	95.2114	19.3299	6153	168.313	0.0989183	0.035609	-5.48957	4.92e-07
Solyc01g095820	0	0	0	0	0.421924	0	0.000869333	0	-6.81752	0.024688
Solyc01g095880	0	0	0.345948	0.0328333	2.33154	0.245653	0.066204	0.0595253	-3.46705	0.000568854
Solyc01g095890	6.81086	5.80175	4.56322	4.35012	13.2168	7.47926	9.25745	10.2497	-1.03473	1.27e-08
Solyc01g095895	1.61121	0.87037	1.43045	1.2707	4.47436	1.7588	2.64478	4.36018	-1.54487	0.00226697
Solyc01g095930	0.922433	0.603727	0.009312	0.0417983	0.113125	0.514772	0.0254937	0.06439	1.97047	0.0168796
Solyc01g095960	3.66194	1.51125	2.67388	1.38257	0.536134	4.07273	7.89839	5.7392	2.67291	0.000688581
Solyc01g096080	38.3984	38.7828	21.0803	22.3004	1.53507	22.9842	39.0677	35.7411	3.71313	1.05e-26
Solyc01g096120	4.08574	3.55509	2.25667	1.46797	2.25147	0.623514	0.689342	0.462264	-2.10168	0.00306954
Solyc01g096140	0.172644	0.0867763	1.83186	0.362279	9.94708	3.29825	3.07828	2.05666	-1.8357	1.11e-09
Solyc01g096170	0.219027	0.205845	0.249623	0.192013	2.49521	0.69455	0.649474	0.81268	-2.03687	7.38e-12
Solyc01g096220	21.8197	15.6464	16.0568	18.1445	3.54642	11.8467	13.2223	17.3084	1.52899	4.71e-09
Solyc01g096230	3.94736	3.84006	3.71724	4.42905	17.4245	4.44808	2.90732	3.7927	-2.1973	9.34e-17
Solyc01g096240	255.794	297.328	98.982	151.854	41.4317	96.512	95.3397	100.201	1.02137	5.08e-08
Solyc01g096250	19.2364	24.3276	18.0657	24.8022	4.10243	11.2116	10.1081	12.5226	1.20701	0.00277345
Solyc01g096260	10.8166	20.3401	2.96032	6.54096	0.661169	17.8973	7.17936	12.5346	4.5811	1.29e-20
Solyc01g096280	0.577781	0.754611	0.370014	0.43954	0.0237237	0.270422	0.181456	0.184686	3.31184	0.00871377
Solyc01g096320	0.582321	0.274684	0.287977	0.43065	0.182529	2.19996	0.334078	0.251138	3.38574	0.000918895
Solyc01g096360	35.3996	34.6222	37.9528	56.5747	7.28386	17.3889	15.5978	17.1019	1.05619	4.46e-05
Solyc01g096370	25.4659	22.2102	33.9952	27.2048	14.7634	42.8746	33.2419	28.4427	1.32581	1.08e-23
Solyc01g096380	0.114943	0.0894623	1.11592	0.489428	5.20524	2.90685	0.406484	0.651236	-1.05534	0.00435557
Solyc01g096400	7.91819	11.4014	2.12061	2.83268	4.92223	1.81035	1.78106	1.73544	-1.66028	0.000222035
Solyc01g096410	1.83149	1.70669	0.653493	0.929701	1.65423	0.312433	0.550642	0.45421	-2.60684	4.27e-12
Solyc01g096420	14.4063	11.6038	4.10452	2.98425	25.2548	4.79194	2.55149	2.16825	-2.63823	5.58e-18
Solyc01g096450	558.879	467.953	1197.23	1185.18	80.6041	785.594	1051.69	1125.71	3.08092	2.92e-36
Solyc01g096510	49.1846	29.2284	9.46354	9.78204	0.397092	2.52541	1.40244	1.46015	2.47386	0.01657
Solyc01g096650	1.44232	1.16813	5.04236	4.6586	16.547	4.96965	4.18181	3.47459	-1.99903	9.8e-05
Solyc01g096720	0.0371397	0.0131133	0	0	0.0698473	0	0.0285347	0	-5.6136	0.0446972
Solyc01g096750	0.00584133	0.204869	15.5519	0.2636	4.61402	36.8251	107.645	101.906	2.75061	2.09e-15
Solyc01g096840	2.5599	2.72022	4.61102	2.6607	1.2041	5.01836	8.25675	7.21621	1.84228	1.22e-15
Solyc01g096940	3.63083	3.16695	18.66	18.7473	10.1331	23.7971	38.3506	36.7929	1.00886	9.31e-11
Solyc01g097000	21.9825	24.3281	42.8527	43.195	22.4106	116.935	101.169	114.33	2.19265	7.82e-22
Solyc01g097070	4.31644	4.89123	11.9113	10.985	5.75721	15.1289	20.7323	18.0714	1.18498	1.89e-09
Solyc01g097080	0.491236	0.355274	0.457254	0.732848	0.520583	1.46221	1.60002	2.05311	1.26852	0.0262646
Solyc01g097100	0	0	0	0.0290153	0.0797847	0	0	0	-5.6757	0.037269
Solyc01g097220	0.450156	0.395959	0.0768933	0.113304	1.94243	0.875415	0.871287	0.6886	-1.34426	0.0028276
Solyc01g097240	5.23454	3.795	0.981785	0.777779	0.146338	1.93154	0.350249	1.13702	3.52305	2e-07
Solyc01g097290	176.545	184.615	132.06	138.179	32.3894	111.191	137.101	158.918	1.56137	1.2e-24
Solyc01g097430	0.011453	0	0.0200763	0.028999	0.563523	0.319456	0.5146	0.420116	-1.02283	0.0424048
Solyc01g097490	0	0.0449577	0.12153	0.0503653	0.363016	0.0452207	0.109886	0	-3.09412	0.0384949
Solyc01g097510	28.506	37.558	45.724	51.1853	9.28144	41.4185	40.7093	35.0833	1.98639	9.79e-07
Solyc01g097520	109.172	156.252	175.527	195.269	30.5641	158.344	137.955	105.463	2.18887	8.4e-13
Solyc01g097620	0.028417	0.0357667	0.079368	0.125771	2.17664	0.115001	0.0437547	0	-4.19444	0.000850763
Solyc01g097660	0.15651	0.154735	269.46	0.420668	3555.51	173.439	1.60601	0	-4.62201	0.00213585
Solyc01g097690	0	0	0.0314493	0	0.396668	0.0419037	0.092679	0.0470573	-3.39179	0.0123435
Solyc01g097720	0.40099	0.403378	0.282667	0.118756	0.327789	0.878932	1.61676	2.36629	1.17581	0.0425934
Solyc01g097770	38.5521	27.0326	3.67075	3.29983	3.35983	7.84017	19.7544	18.326	1.00158	0.00022403
Solyc01g097850	0	0	0.0706567	0	0.19916	0	0.0344013	0	-5.53694	0.0419025
Solyc01g097880	74.0542	85.5975	74.9405	68.0148	308.77	74.6841	51.1251	44.8304	-2.29281	2.05e-16
Solyc01g097950	1.04794	1.07305	9.58024	6.13885	5.27505	19.7445	26.0452	24.6011	1.67558	9.97e-16
Solyc01g098050	0	0	0.144013	0	2.45556	0.162401	0.104003	0.0405483	-4.14871	0.000173628
Solyc01g098110	8.72321	10.2116	8.33106	10.8155	24.4799	8.7274	8.48979	8.51263	-1.66588	2.66e-06
Solyc01g098200	12.4101	12.315	15.3648	18.4924	38.6642	18.782	15.4129	16.9505	-1.23732	4.93e-10
Solyc01g098220	0.121797	0.160955	9.33152	0.0244213	231.838	13.7057	0.0450493	0	-4.36064	0.00809211
Solyc01g098230	9.75655	9.7925	10.4564	9.26504	22.6682	12.2421	12.7064	13.0688	-1.10329	1.8e-12
Solyc01g098240	0.0352763	0.0402567	0.466334	0.061045	3.66182	1.00787	1.72954	2.17429	-2.10639	3.63e-06
Solyc01g098270	0	0	0	0	0.472857	0.00623967	0	0	-5.86917	0.000614169
Solyc01g098320	9.85435	12.6911	27.4863	24.5766	14.462	47.6032	47.721	45.2194	1.4955	3.37e-15
Solyc01g098400	141.066	170.269	33.4477	51.1439	1.11031	30.3248	90.8983	94.4227	4.53852	3.07e-47
Solyc01g098440	0.0155193	0	0	0	0.0838677	0	0.0305933	0	-5.93752	0.0152375
Solyc01g098450	1.98959	1.37038	1.53988	1.10576	3.66772	2.05287	4.58683	5.68858	-1.05517	8.95e-05
Solyc01g098470	0.606237	0.799574	1.03842	0.566377	2.25951	0.739944	1.75925	1.25531	-1.84886	0.0198617
Solyc01g098490	0.031774	0.042039	0.0218347	0.0476563	0.299677	0.0368387	0.010416	0	-2.93148	0.00121195
Solyc01g098570	4.10189	1.87423	1.36833	1.73016	1.31046	0.332651	0.0421207	0.0846443	-2.17439	1.88e-06
Solyc01g098590	56.7299	62.0744	19.7761	33.7199	3.55653	13.0974	10.1417	16.4961	1.70181	9.76e-05
Solyc01g098720	1.83961	2.31202	11.8331	1.3883	3.04722	33.024	64.8314	54.4806	3.20111	2.28e-23
Solyc01g098740	44.855	42.2319	38.3562	54.9896	3.8163	13.453	27.8761	27.1267	1.62638	8.96e-10
Solyc01g098760	142.804	156.974	121.731	170.041	44.0837	116.697	115.698	132.062	1.19555	2.38e-20
Solyc01g098820	0.317041	0.258538	1.92116	1.66043	3.67752	0.864572	0.459855	0.454461	-2.30384	4.42e-06
Solyc01g098860	0.054351	0.318989	0.109257	0.0970137	0.372276	0.0143897	0.0832467	0.109237	-4.67048	0.0153692
Solyc01g098930	5.03815	6.06409	7.8928	10.979	0.555267	5.26728	8.45498	8.24792	3.01687	1.57e-18
Solyc01g098940	0.747474	0.641895	1.7698	1.19442	0.437579	14.3331	11.4343	16.0967	4.83668	1.49e-39
Solyc01g098950	0.486537	0.403808	0.636165	0.286202	0.738206	8.00585	5.73313	7.45125	3.21504	1.79e-27
Solyc01g099020	9.71312	7.58146	1.66096	1.99091	3.91006	9.55737	4.12459	4.49889	1.1172	0.0146133
Solyc01g099050	1.5646	1.81156	0.626519	1.44208	0.168414	0	0	0.0112893	-6.58702	0.00153439
Solyc01g099100	15.3577	13.4689	14.0368	14.0612	60.017	21.5402	21.2235	21.3646	-1.70803	3.34e-17
Solyc01g099140	5.97776	6.77328	6.28945	5.36063	48.4831	10.7718	7.73623	8.05026	-2.42031	1.22e-13
Solyc01g099200	0.0389393	0.0807583	0.036755	0.0554327	1.62826	0.535016	0.109896	0.212152	-1.78575	0.00667324
Solyc01g099210	0.073897	0.083688	0.184061	0.0847163	3.74258	0.984113	0.0259883	0.052903	-2.11177	0.00217955
Solyc01g099270	3.65477	3.98487	4.6319	2.99706	1.61153	5.74331	10.5352	11.1253	1.63567	5.05e-09
Solyc01g099340	4.82462	6.2493	1.33782	2.73849	0.174377	1.3273	1.27327	2.0995	2.69404	7.01e-09
Solyc01g099410	457.049	581.955	1232.07	1289.79	552.367	1478.41	1482.83	1259.85	1.21974	5.2e-13
Solyc01g099420	0.539158	0.565314	0.474925	0.223028	1.8784	0.592549	1.31879	1.10393	-1.84246	0.0133233
Solyc01g099500	0.133068	0.182352	0	0.0343447	0.414887	0.0637923	0.207731	0.0933283	-2.79664	0.0378781
Solyc01g099540	0.174544	0.152931	2646.6	1.92271	3121.44	430.965	0.460491	0.99529	-3.11744	0.0149266
Solyc01g099570	0	0	26.0638	0.0801053	508.136	31.6413	0.271636	0	-4.24782	0.0119086
Solyc01g099590	9.58742	10.8188	4.83437	6.77721	9.76976	1.64431	2.90558	3.10133	-2.74553	0.000575605
Solyc01g099620	0.0221633	0.019425	2.06941	0.179522	23.099	2.42964	0.203981	0.20312	-3.47709	0.000348513
Solyc01g099660	0.469661	0.185904	0.691724	0.192124	6.75218	1.70913	0.502242	0.313643	-2.24426	4.49e-06
Solyc01g099770	2204.63	2506.35	3269.25	3970.84	1098.85	2719.81	2352.18	2347.2	1.08579	5.78e-09
Solyc01g099780	23.0558	23.6332	24.3823	23.4662	88.7009	22.9837	23.5139	20.2208	-2.20588	8.52e-10
Solyc01g099820	2.34312	1.4209	5.05357	3.04081	41.4402	9.84791	4.23647	4.2072	-2.2412	1.78e-06
Solyc01g099840	162.624	218.914	148.53	239.463	30.6585	155.198	52.8588	74.1756	2.13849	3.1e-23
Solyc01g099880	5.30289	3.18282	4.91321	3.60254	0.371715	4.98096	2.94372	2.51167	3.53641	2.57e-19
Solyc01g099920	0	0	0.274237	1.01249	84.7439	3.29948	0.0811307	0.0860743	-4.95776	1.94e-07
Solyc01g099930	33.059	29.7599	22.1292	19.866	62.7331	34.7212	41.8159	36.0441	-1.05987	5.36e-09
Solyc01g099950	0	0	0.264182	0	29.5538	1.40584	0	0	-4.67047	0.00667421
Solyc01g099980	5.11194	4.98446	5.93992	6.05253	3.57599	13.5875	21.6785	25.8451	1.72597	2.41e-16
Solyc01g099990	0.690402	0.567547	0.465168	0.629043	5.19316	0.336232	0.0670413	0.0668317	-4.19693	1.13e-08
Solyc01g100000	52.7547	79.6613	7.11377	14.5785	1.41259	7.11066	6.30974	9.77439	2.14995	7.67e-07
Solyc01g100010	32.8842	28.7269	5.79752	11.5762	1.8819	6.19825	8.03158	10.5172	1.47051	0.00790664
Solyc01g100030	72.7487	74.2506	143.426	94.4447	60.2317	214.382	309.975	237.577	1.60082	6.04e-18
Solyc01g100040	104.245	108.249	70.0358	86.1635	29.2013	72.1168	59.6519	64.0479	1.08883	1.85e-11
Solyc01g100070	0.182622	0.182339	0.177703	0.104803	1.15857	0.269748	0.461384	0.321043	-2.26253	0.00276398
Solyc01g100120	0.471841	0.266961	0.523287	0.593652	2.45413	1.19588	0.325913	0.433368	-1.20617	0.0311203
Solyc01g100200	15.1674	17.3327	3.27881	6.24701	0.723356	2.55869	4.46839	7.61082	1.62409	4.41e-05
Solyc01g100210	2.19694	1.99465	0.606372	0.261437	1.63238	0.575485	0.204393	0.328569	-1.70749	0.0357095
Solyc01g100270	2.84504	2.46249	4.60136	3.68103	17.4718	8.89337	9.65627	9.02186	-1.22484	0.00311172
Solyc01g100300	0.232485	0.12193	1.56229	1.17667	0.168276	1.34087	1.20006	1.57375	2.6901	0.0367955
Solyc01g100310	20.7649	14.1807	65.6532	64.8375	6.9786	43.3913	62.8995	61.6011	2.42563	6.67e-52
Solyc01g100390	0.159836	0.245951	0.419361	0.475584	1.02098	0.277992	0.318459	0.273628	-2.09926	0.000109808
Solyc01g100440	0.0162397	0.138335	0.0454867	0.391598	3.85718	0.081131	0.0209297	0.0297493	-5.7833	1.92e-13
Solyc01g100490	0.51402	0.263627	0.783834	0.317312	6.13221	2.38312	0.660385	0.856304	-1.56096	9.75e-07
Solyc01g100530	17.1278	14.0036	50.0641	42.5987	26.4041	68.3173	104.081	104.316	1.16657	1.08e-21
Solyc01g100620	0.0486727	0.0682327	0.47465	0.124854	0.70592	2.86562	4.22471	4.21164	1.78997	6.2e-08
Solyc01g100750	21.2396	20.6587	69.6828	59.1107	2126.96	91.5937	28.9885	23.1298	-4.8291	2.85e-07
Solyc01g100780	3.46883	4.25641	5.73151	4.53115	2.75946	7.251	11.5793	10.9193	1.18779	2.33e-06
Solyc01g100810	10.4298	8.4551	7.60042	7.33234	10.9327	6.24591	6.45933	7.51544	-1.01894	1.19e-11
Solyc01g100830	0.0161503	0	0	0	0.132668	0	0.0937537	0	-5.8717	0.0330592
Solyc01g100880	0	0	1.19037	0.098994	18.0854	8.02674	0.037817	0.0527753	-1.39317	0.025084
Solyc01g100890	0.620462	0.767936	1.48854	0.146592	1.30759	0.221942	3.41693	3.48147	-2.79659	3.19e-06
Solyc01g100900	12.3094	12.6551	7.56532	12.5618	6.34411	2.83752	1.12516	2.64975	-1.34228	0.000880998
Solyc01g100920	3.72043	2.85167	6.71814	3.6669	173.038	9.38293	13.7871	13.2781	-4.36318	3.64e-06
Solyc01g101060	347.035	360.56	351.883	464.047	197.45	493.719	478.072	542.362	1.10183	1.49e-11
Solyc01g101130	7.60318	5.66466	17.8672	7.78021	37.7724	17.1958	21.3137	19.2693	-1.37932	4.26e-06
Solyc01g101180	0.027133	0.0209677	0.0145523	0.00728433	0.619051	0	0	0	-9.08851	2.04e-08
Solyc01g102320	0	0	0.115898	0.119555	15.5931	3.00708	0.184997	0.244637	-2.64876	3.61e-05
Solyc01g102330	108.994	114.966	155.65	164.508	31.0214	135.807	143.961	124.205	1.93125	7.15e-26
Solyc01g102350	26.6262	24.2436	9.03199	11.8723	47.6723	9.36058	11.1458	12.6753	-2.60951	1.53e-13
Solyc01g102630	0	0	0.109595	0.00930067	0.526353	0.026856	0.084747	0.0750923	-4.31719	0.0087095
Solyc01g102640	1.44919	1.55703	1.68466	0.869494	14.7176	3.5722	5.01252	6.65605	-2.29046	3.42e-06
Solyc01g102650	1.66928	1.23451	1.19274	0.51164	9.53094	4.0176	3.96174	5.5631	-1.48939	0.00248217
Solyc01g102680	0.0833493	0.0671297	0.640895	0.0674013	1.63504	0.370987	0.397713	0.202741	-2.39831	0.000171071
Solyc01g102700	4.54322	3.57921	3.26241	3.68727	2.21042	5.11959	6.6884	7.66113	1.04354	0.0319669
Solyc01g102710	13.0108	11.3817	2.07061	3.89667	62.6259	3.3708	0.920932	1.27195	-4.49335	6.74e-10
Solyc01g102720	30.4343	27.4656	31.161	39.3522	4.83567	27.0324	21.0649	24.9813	2.2431	6.8e-13
Solyc01g102930	0.0542087	0.0278507	0.00946467	0.0294613	0.268858	0.00894167	0.0138857	0	-4.83152	0.00899451
Solyc01g102960	15.6129	3.31275	38.6705	9.00106	24.7953	3.55387	33.2426	5.12353	-2.95901	0.0108461
Solyc01g103030	6.64383	4.90317	4.3836	3.20774	2.88364	0.797412	2.64036	3.33242	-2.06905	1.81e-11
Solyc01g103070	5.82198	6.1328	8.87486	5.72936	2.60515	10.1062	15.3236	12.1926	1.73276	2.1e-12
Solyc01g103120	0.330664	0.199969	0.627767	0.593439	11.3906	3.33469	1.05851	1.00061	-1.98691	1.98e-06
Solyc01g103130	0.090582	0.023294	0.266485	0.138258	6.69234	1.27751	0.631477	0.884008	-2.5804	9.79e-14
Solyc01g103140	5.08092	3.62411	8.32566	9.55316	38.4663	11.7936	5.7332	7.11877	-1.90215	8.58e-11
Solyc01g103150	5.65375	5.38258	6.08597	5.50053	15.035	8.75411	6.91169	7.74751	-1.02283	0.00494667
Solyc01g103230	13.0065	12.0832	13.1685	15.5678	30.9964	17.8106	21.1685	21.5402	-1.00008	1.4e-09
Solyc01g103240	0.019164	0.0366513	0.172158	0.069504	2.40883	0.988345	0.519265	0.605206	-1.47236	0.00594978
Solyc01g103470	7.9121	6.31979	7.64003	6.42872	1.21163	3.49777	6.27169	6.0233	1.32045	0.000554163
Solyc01g103500	0.345866	0.354313	15.6539	1.56676	53.1937	8.39418	3.00201	1.74309	-2.87126	0.00260673
Solyc01g103550	0.291298	0.301061	0.392105	0.31924	1.30265	0.604857	0.541157	0.566727	-1.34445	0.0283504
Solyc01g103580	4.71977	4.78176	2.74354	3.54561	23.2084	4.67065	3.59607	3.9501	-2.57442	8.17e-10
Solyc01g103590	233.708	190.573	423.192	386.504	89.5888	264.198	220.64	180.323	1.35945	1.17e-11
Solyc01g103650	9.13639	10.2782	14.5014	4.38028	16.8671	4.30529	3.31929	2.93437	-2.20294	2.14e-06
Solyc01g103660	2.87436	1.58916	9.99887	6.59762	1.79173	8.63188	8.82353	8.02823	2.10451	3.04e-05
Solyc01g103780	23.8213	23.9224	24.7638	26.392	9.59205	26.3918	38.7813	46.6739	1.25004	2.1e-08
Solyc01g103790	2.63475	2.32264	2.34475	2.00175	6.12074	1.80775	3.62897	5.2176	-1.95365	5.31e-05
Solyc01g103840	0	0	0.0395247	0	1.15062	0	0	0	-7.12345	0.00124322
Solyc01g103900	0	0	0.0338293	0.0198497	6.06894	0.613703	0.057743	0	-3.41333	0.00141309
Solyc01g103910	0	0	0.0171463	0	4.51746	0.431072	0.0521123	0.0339937	-3.52234	0.0438754
Solyc01g103920	0.148547	0.252013	0.133955	0.051833	0.725699	0.0360323	0.209608	0.347669	-4.18371	0.000386641
Solyc01g103980	16.5899	17.1717	17.1156	17.5246	39.5361	23.1791	19.4074	21.1459	-1.0119	0.000169405
Solyc01g104100	1.32999	1.09615	0.800533	0.548604	21.5022	3.31095	0.0705227	0.271981	-2.87426	8.92e-07
Solyc01g104130	9.3696	9.82303	6.227	8.50436	5.62906	1.39596	1.15813	1.53682	-2.22493	9.83e-11
Solyc01g104230	5.56691	6.59924	10.5371	7.91678	3.62516	10.454	16.305	14	1.30556	9.28e-12
Solyc01g104430	0.123246	0.346256	0.342306	0.125861	1.2114	0.451659	0.826067	0.862929	-1.60556	0.0109244
Solyc01g104443	0	0	0.103453	0	0.193611	0	0.00746867	0.0737163	-5.55431	0.045782
Solyc01g104470	245.344	255.149	581.027	564.986	150.209	440.991	392.514	383.628	1.32846	4.28e-11
Solyc01g104500	21.3589	22.7914	28.2735	26.7998	77.3402	42.1065	47.4114	46.9065	-1.12464	0.000208417
Solyc01g104620	1.58723	4.57827	2.60065	4.33197	23.4643	6.92128	2.48237	4.16785	-2.01019	1.49e-07
Solyc01g104760	1.73845	1.87575	1.09081	0.805158	4.56609	2.3766	2.89826	2.62048	-1.14147	3.17e-06
Solyc01g104780	0.509389	0.39443	3.77977	1.53033	165.112	12.545	6.68329	4.79029	-3.93746	0.00189834
Solyc01g104800	0.0496887	0.094893	0.680903	0.0692777	2.43204	0.416228	0.292348	0.25427	-2.82331	0.000329871
Solyc01g104810	0.0313443	0	0.334344	0.153427	0.882823	0.214163	0.175712	0.149975	-2.33587	0.0143305
Solyc01g104870	0	0	0	0.00822367	0.338067	0.047378	0	0	-3.00204	0.0209615
Solyc01g104940	0.022584	0.0376723	0.0691377	0	3.51035	0.119856	0.0394297	0.0157627	-5.10939	2.39e-06
Solyc01g104990	5.89831	6.21435	10.0982	10.3389	4.68012	15.0978	16.5808	17.3841	1.46829	1.1e-13
Solyc01g105300	0.51402	0.874422	1.17341	0.532553	8.22254	0.726574	0.884183	0.742252	-3.75755	6.64e-15
Solyc01g105360	30.5931	34.374	6.09405	6.71121	0.127779	5.32486	7.17633	7.62457	5.22427	0.000339089
Solyc01g105370	7.67676	10.5453	5.22276	7.23939	21.2474	10.9715	6.25079	6.55296	-1.14217	0.000126612
Solyc01g105387	0.00645533	0	0.035286	0.15312	0.170919	4.6725	4.69383	5.5803	4.57598	3.78e-13
Solyc01g105410	87.847	92.5647	59.1313	59.0797	43.7353	127.784	192.104	182.26	1.3292	2.19e-14
Solyc01g105430	1.12572	1.57534	1.77586	1.69181	1.67765	4.47595	5.10826	5.37111	1.19096	0.0107898
Solyc01g105450	4.37448	5.49169	1.62864	1.93743	8.45872	3.11581	0.987019	1.50754	-1.63698	2.1e-05
Solyc01g105580	0	0	0.0648407	0.168056	0.101477	0	0	0	-5.91867	0.0340394
Solyc01g105600	2.62571	2.68584	0.619938	2.39731	67.4883	4.91296	0.191558	0.252808	-4.05114	1.59e-05
Solyc01g105630	2.45222	1.39067	0.656097	0.604927	4.0554	0.522573	0.579535	0.14093	-3.15521	0.00464309
Solyc01g105680	1.00713	0.721493	0.317942	0.192868	0.311039	1.86723	2.07787	1.94041	2.41096	5.99e-05
Solyc01g105720	14.3472	10.2983	28.2588	26.1074	46.0208	21.2922	18.7574	18.6589	-1.33608	6.29e-12
Solyc01g105870	0.067257	0	0.186388	0.00813667	0.00866333	0.462564	1.05466	0.730219	5.19755	0.000397721
Solyc01g105880	0.0293417	0.0452823	3.13642	0.608659	0.080311	27.8461	39.4862	50.4395	8.21891	4.71e-103
Solyc01g105890	11.6006	9.59039	4.00112	5.56853	0.608055	8.82541	6.95031	6.84944	3.68629	6.71e-12
Solyc01g105940	0.447456	0.377987	0.355499	0.0313893	4.43476	0.649362	2.34654	2.37781	-2.99031	2.62e-06
Solyc01g105960	0.008271	0.108682	0.0209003	0.0629653	0.36608	0.021515	0.098168	0.091353	-4.15676	0.00959329
Solyc01g106040	2.02829	1.63678	3.18011	1.70453	10.0585	5.19215	6.03318	6.54725	-1.18033	4.16e-05
Solyc01g106050	16.1725	15.8571	14.1552	11.9903	73.3413	24.2854	31.2988	32.8982	-1.82811	1.52e-13
Solyc01g106150	0.286334	0.412129	0.471258	0.291178	6.27134	0.491003	0.239122	0.335009	-3.89532	2.31e-06
Solyc01g106200	0	0.0276333	0.457391	0.242895	0.214662	2.23895	4.2326	5.46658	3.09813	0.000130332
Solyc01g106250	0.572403	0.677198	13.9777	14.9756	0.905861	35.9676	49.4901	56.9736	5.09372	2.57e-81
Solyc01g106270	0	0.0273963	0.181282	0	0.867139	0.0279423	0	0	-5.06333	0.00260412
Solyc01g106320	36.3611	40.4014	50.7248	61.8743	12.5829	43.6215	44.9308	48.5119	1.59136	3.13e-17
Solyc01g106390	17.4481	15.6986	6.1623	7.89307	4.60429	10.7814	9.51075	12.7948	1.02194	2.86e-06
Solyc01g106400	20.1123	23.1032	4.68116	6.07495	1.38818	5.86388	4.83026	4.35666	1.87264	6.77e-07
Solyc01g106410	0.168118	0.127763	0.110594	0.0638257	0.505396	0.170118	0.27656	0.344623	-1.75134	0.000116108
Solyc01g106470	37.7547	32.6145	25.5704	20.4223	64.8232	28.5778	22.5994	17.6405	-1.41633	7.82e-09
Solyc01g106500	1.97099	1.78064	0.772944	1.31355	0.725332	2.53559	1.44515	2.23444	1.61242	1.06e-05
Solyc01g106575	0	0	0.0545213	0	1.3172	0.181811	0	0	-3.05724	0.00220193
Solyc01g106750	5.15404	5.34224	13.922	8.07149	4.03579	15.41	23.7713	24.7769	1.73613	9.77e-17
Solyc01g106920	0.0294293	0.084258	0.063519	0.198825	0.525504	1.77888	1.74734	1.67048	1.54822	1.3e-05
Solyc01g106950	5.98493	5.60067	5.22876	4.58847	15.1185	8.037	12.0765	13.5718	-1.12053	2.53e-09
Solyc01g106970	0.06713	0.086087	0.083215	0.0849853	1.30249	0.173153	0.0376493	0.07875	-3.17162	9.86e-06
Solyc01g107060	0	0.0525753	0	0.031166	0.118634	0.983531	0.623492	1.20676	2.76232	0.00332505
Solyc01g107120	0.0325957	0.041264	0.0222313	0.0179997	1.12692	0.443891	0.178329	0.103056	-1.58339	0.0235743
Solyc01g107180	5.96786	5.45091	19.1276	7.75351	22.2972	54.6289	65.776	62.7566	1.07487	1.32e-13
Solyc01g107190	27.801	31.7294	31.9283	28.4325	4.89994	21.4636	36.3639	28.5755	1.90921	3.96e-12
Solyc01g107270	0.269683	0.311625	0.464392	0.25181	1.7045	0.999617	1.27115	1.69803	-1.01336	0.0223989
Solyc01g107340	40.2193	48.8255	57.7844	59.4738	41.533	227.422	178.984	182.453	2.24607	2.23e-42
Solyc01g107390	5.52942	6.11295	2.0203	3.49278	59.8004	8.00902	1.48836	1.28144	-3.0876	0.00149762
Solyc01g107440	0.246582	0.0247323	0.114988	0.146534	1.18441	0.085699	1.26384	1.97763	-3.73505	0.00573863
Solyc01g107590	39.7601	27.3933	38.1948	41.7493	32.0014	16.0014	39.0546	35.6925	-1.24201	1.01e-05
Solyc01g107650	15.7395	13.0348	26.3502	25.1825	8.26252	22.6504	33.3491	35.6486	1.24722	8.88e-12
Solyc01g107760	0.503886	1.04762	1.78572	1.51373	20.5372	2.33701	1.23699	1.73552	-3.42524	3.87e-09
Solyc01g107900	11.3993	9.79607	1.26805	1.91987	9.49987	0.796999	0.187059	0.267968	-3.75514	1.32e-11
Solyc01g107910	20.6146	11.9738	338.642	18.4077	377.387	75.8652	8.35892	7.98098	-2.55692	0.0239897
Solyc01g107920	0.653422	1.12235	1.12437	1.22503	3.10423	1.04755	0.338619	0.554091	-1.77196	2.11e-06
Solyc01g107990	11.1568	12.4514	14.115	17.339	32.767	12.6976	4.71617	4.49957	-1.58627	1.4e-06
Solyc01g108080	15.9299	19.2463	19.6249	20.8432	15.6865	37.9579	47.7298	48.3896	1.06307	6.68e-16
Solyc01g108090	0	0	0.0422277	0	2.28582	0.120301	0.120391	0.0587537	-4.47346	0.000111672
Solyc01g108160	2.94766	2.87469	3.05203	3.13333	7.50512	4.35624	6.80546	8.47206	-1.01375	4e-06
Solyc01g108170	6.06597	7.12138	2.56523	7.91105	0.67001	6.97198	2.93148	4.44199	3.13464	5.35e-11
Solyc01g108220	0.669842	0.526332	0.476118	0.289831	2.19283	0.757121	0.999084	1.00555	-1.67818	0.0418387
Solyc01g108270	0.049266	0.014546	0.119214	0.0913623	4.01088	1.31897	0.364273	0.638419	-1.78147	0.000356836
Solyc01g108390	53.1986	75.0434	39.4339	42.4925	8.85404	22.1851	32.0463	27.8969	1.11825	6.49e-06
Solyc01g108440	2.97787	2.69453	3.48522	3.97069	15.4383	5.18236	1.78961	2.38081	-1.80327	6.25e-16
Solyc01g108460	0.005687	0.016765	0.00840567	0.00455567	5.5246	0.155924	0.00757267	0	-5.25853	0.0307108
Solyc01g108500	99.364	99.3471	109.577	120.78	67.9487	161.368	128.765	143.316	1.0253	2.45e-07
Solyc01g108610	9.35883	8.88667	4.2234	3.86992	16.2351	4.91431	1.92033	1.82741	-1.92595	6.78e-06
Solyc01g108630	62.8738	68.505	16.3426	21.4887	1.63724	4.66272	3.55827	3.21698	1.29698	1.15e-06
Solyc01g108640	1.0508	1.10488	2.25669	0.864252	12.0871	4.44279	2.33151	2.55638	-1.66378	7.36e-05
Solyc01g108680	1.20727	1.08418	0.0708517	0	0.683339	0.205504	0	0.016394	-1.99901	0.0347634
Solyc01g108850	0	0	0	0	0.0975793	0	0.0237513	0	-6.00614	0.0135453
Solyc01g108880	9.32934	12.3939	5.9214	12.781	4.23367	11.5211	5.60756	7.39915	1.23193	4.34e-09
Solyc01g108900	1.68354	1.63067	1.1041	0.616681	2.70251	1.22246	1.87543	1.89797	-1.3637	0.00648541
Solyc01g108930	1.21435	1.39962	7.5807	2.87064	6.36896	23.0811	41.8369	36.4569	1.64526	1.84e-10
Solyc01g108970	1.18004	1.01562	0.74996	0.649124	2.898	1.31668	4.08855	4.63163	-1.33045	0.0145279
Solyc01g109010	4.79446	3.95793	3.04352	2.32963	8.51322	4.13696	6.17056	5.76724	-1.24652	1.35e-07
Solyc01g109090	254.192	392.662	107.355	170.445	8.82732	43.4123	20.9393	39.4086	2.09056	1.71e-12
Solyc01g109150	0.945229	0.7701	4.9266	0.904211	0.387462	7.72973	30.375	26.9295	4.12356	7.28e-21
Solyc01g109200	10.9125	10.1709	10.5699	12.7311	2.99833	8.52344	8.77394	13.0004	1.27562	0.000473828
Solyc01g109210	4.4108	4.87213	3.86404	3.38883	2.36593	8.74954	9.99753	10.5811	1.68553	6.84e-10
Solyc01g109230	14.6385	17.2888	14.0441	18.588	0.870453	6.82278	5.89248	6.70162	2.73109	4.8e-11
Solyc01g109250	41.325	40.8343	9.87073	20.1922	2.27295	6.76377	13.0719	20.8087	1.3699	0.00944282
Solyc01g109270	0.953376	0.98587	0.440217	0.368596	0.181551	0.638157	0.842572	0.850319	1.56325	0.0301152
Solyc01g109330	1.76448	1.83216	2.69187	2.65749	125.761	8.97144	0.725889	0.820019	-4.05031	1.09e-25
Solyc01g109390	0.216808	0.346015	4.24947	3.48695	0.164709	1.7458	0.98285	0.756465	3.08617	9.91e-06
Solyc01g109460	62.7863	54.5261	45.6468	41.6213	536.982	101.658	52.1962	56.4723	-2.67368	0.000243776
Solyc01g109470	0.811585	0.862378	0.544885	0.709951	1.59495	0.286329	0.170528	0.229937	-2.73584	0.00173568
Solyc01g109500	18.8035	27.5906	0.435352	0.62303	2.61266	1.00377	0.850496	0.820159	-1.63936	0.00405025
Solyc01g109530	0.0289567	0.017418	0.0485327	0.0337497	0.369045	0	0	0	-8.52393	5.75e-06
Solyc01g109570	43.1196	46.2104	91.2354	55.4353	326.321	81.8635	38.8797	40.7276	-2.24389	0.00286028
Solyc01g109610	1.10999	1.23741	8.33631	6.80276	67.3426	21.6046	15.9923	17.7023	-1.91317	9.56e-06
Solyc01g109615	0.145548	0.0540443	0.862484	0.845842	9.56398	2.05195	1.97836	2.20184	-2.48666	0.000856824
Solyc01g109670	1.50223	1.01479	10.5848	0.988737	122.054	11.5579	26.5173	11.223	-3.70007	0.000311689
Solyc01g109680	15.4325	19.3747	8.90011	9.91306	12.9651	7.55066	4.8407	4.46609	-1.00448	0.00157262
Solyc01g109730	0	0	1.12187	0	6.001	0.850494	0.00843033	0.017566	-3.02706	0.00252204
Solyc01g109750	3.50705	4.11028	5.61925	4.02956	2.71636	6.23334	7.60949	7.06051	1.00659	0.00385122
Solyc01g109810	4.40985	4.64916	5.54089	9.02682	0.622026	2.01325	1.54199	2.00698	1.44533	0.00667421
Solyc01g109820	0	0.0224943	0.282297	0	3.23671	0.187874	0.0587703	0.0412793	-4.21749	4.3e-09
Solyc01g109950	0.106475	0.052818	0.0502343	0.043969	0.186841	0.0467323	0.0711953	0.0808697	-2.12487	0.0122151
Solyc01g110000	44.7568	31.1356	20.4574	26.2928	154.954	23.1526	17.2632	18.9201	-3.02914	7.77e-05
Solyc01g110060	45.6195	49.4377	17.458	28.0405	47.6436	19.1998	18.1074	20.6915	-1.57516	4.93e-05
Solyc01g110080	0	0.020766	0.362271	0.07481	8.77642	0.769672	0	0	-3.78202	1.25e-06
Solyc01g110090	0	0	0.063096	0	2.12102	0.170128	0	0	-3.91402	0.00188306
Solyc01g110110	9.12163	10.9179	12.6685	13.5479	54.9589	19.4806	13.0669	13.0993	-1.72482	3.41e-12
Solyc01g110150	16.2402	18.6732	20.4096	12.4586	54.7819	24.0934	16.8392	15.33	-1.42259	5.06e-07
Solyc01g110180	0.618124	0.684157	1.32662	1.67606	3.48613	1.58275	2.37635	2.65245	-1.34668	0.000367904
Solyc01g110430	0.158892	0	0.306717	0.331533	0.808215	0	0.0422757	0.267302	-9.83219	3.63e-12
Solyc01g110440	265.681	170.073	354.097	237.535	615.451	241.136	216.985	223.716	-1.58616	3.16e-15
Solyc01g110460	4.99202	5.27529	4.21777	4.87777	2.41822	5.61257	7.69811	7.29449	1.01254	5.26e-06
Solyc01g110500	0.448899	0.448634	0.160531	0.0174173	1.64641	0.105156	0.0308833	0	-4.11332	3.25e-05
Solyc01g110510	1.04227	1.83229	1.26633	1.44395	2.27999	0.67363	0.51985	0.578349	-1.96294	9e-05
Solyc01g110570	10.3644	3.6976	14.1335	13.8949	2.79133	38.0761	24.1874	16.649	3.50635	2.83e-15
Solyc01g110640	0.046883	0.0108147	0.0461423	0.0113263	0.979105	0.0894327	0.183683	0.228651	-3.65194	0.00119482
Solyc01g110660	1.84201	1.493	1.99547	2.5332	1.47813	0.520437	1.08053	0.65981	-1.73706	0.0160608
Solyc01g110880	1.09579	1.17481	0.285817	0.450398	0.0122853	0.863238	0.472319	0.534932	5.73761	0.0048865
Solyc01g110950	0	0	2.16689	0.0934443	10.2334	0.878147	0.0510283	0.014071	-3.74641	0.0045846
Solyc01g111040	46.2252	41.9075	20.7068	18.5338	33.2651	18.1393	13.7828	12.5738	-1.1144	0.000107189
Solyc01g111110	78.3322	88.5008	58.4797	86.2308	106.108	55.5633	37.8758	44.9385	-1.20134	0.00646887
Solyc01g111160	141.252	121.984	8.86429	31.6804	136.733	42.7861	2.74252	5.00821	-1.83871	0.0186467
Solyc01g111220	0.383533	0.430089	0.234324	0.270419	14.5524	2.70582	0.431648	0.434878	-2.61477	4.1e-07
Solyc01g111250	0.250473	0.321433	0.946434	0.581822	4.32029	0.314301	0.024191	0.0703063	-4.00102	0.016667
Solyc01g111270	0.207247	0.276827	1.54957	0.378387	1.26696	4.25432	10.7367	13.011	1.54238	1.14e-07
Solyc01g111280	6.12456	7.19954	6.50803	6.30313	2.26283	16.2069	16.7911	21.5469	2.63294	1.82e-23
Solyc01g111310	13.0164	14.5222	70.808	60.7393	13.976	79.4602	98.1687	88.4099	2.27977	8.77e-41
Solyc01g111330	27.7012	24.9971	49.9108	46.5085	14.7242	53.1475	78.748	70.8136	1.63627	3.96e-28
Solyc01g111340	1.50015	1.59862	11.3872	0.706605	42.3538	3.79859	0.894314	0.755525	-3.74119	0.00417728
Solyc01g111380	27.7784	35.7065	34.6599	41.918	31.8588	15.9102	19.1372	20.1558	-1.21606	6.84e-09
Solyc01g111500	13.0799	13.5743	7.53763	9.82506	24.5112	12.2079	3.71632	5.19516	-1.21163	1.57e-05
Solyc01g111540	0	0.0143893	0.0888133	0.0328177	7.40857	0.219727	0.157428	0.133991	-5.19669	0.0033747
Solyc01g111600	159.694	206.131	176.168	183.943	39.3667	188.148	195.436	169.587	2.03351	5.98e-30
Solyc01g111700	1.3012	2.08261	2.35946	2.31508	1.82921	7.93195	13.1955	15.8115	1.91877	7.31e-10
Solyc01g111790	0.0723497	0.155896	0.663838	0.0754893	1.86485	0.378865	0.0396557	0.0197907	-2.49605	0.0100957
Solyc01g111820	0.036394	0.144246	0.28645	0.143263	0.798648	0.13717	0.202678	0.0618717	-2.66859	0.0163404
Solyc01g111830	222.334	190.649	293.744	289.469	96.248	238.453	251.265	226.057	1.07902	1.68e-07
Solyc01g111900	0	0	0.159348	0.0288203	5.56272	2.02159	0.0548297	0.102461	-1.69367	0.00200799
Solyc01g111950	1.61979	1.24315	4.52031	6.65542	3.41428	1.67804	2.0775	1.74373	-1.22707	1.94e-07
Solyc01g111970	0.910729	0.537613	1.24075	1.10989	127.282	7.7783	0.0251647	0.0301713	-4.2768	1.65e-24
Solyc01g111980	79.2464	44.6874	7.19446	7.79682	0.78901	2.01926	5.00798	3.68865	1.12446	0.0135067
Solyc01g112000	63.7514	55.0892	34.4937	41.4962	67.7219	22.6438	14.1462	19.0579	-1.79503	1.48e-09
Solyc01g112010	1.88906	2.00061	2.61857	1.33822	5.68352	3.18782	4.27155	3.81743	-1.04132	0.000831192
Solyc01g112220	3.16567	3.97024	1.88336	3.96454	0.968492	3.12339	2.65817	3.14846	1.48645	5.51e-07
Solyc01g112230	0.107492	0.0903587	0.52247	0.116732	13.8709	2.32859	0.0811307	0.083642	-2.72039	0.00115527
Solyc01g150126	1.8103	2.90328	1.4909	3.14736	0	0.761137	0.525279	1.33038	6.87139	0.000790302
Solyc01g150131	0.431782	0.423407	0.811312	0.911931	0.27799	1.09693	1.58565	1.57089	1.76267	0.0156847
Solyc01g150141	0	0	0	0	0.17573	0.00506567	0	0	-4.97717	0.0456011
Solyc01g150142	0	0	0	0	0.230601	0.0109643	0	0	-4.45836	0.00882429
Solyc01g150144	3.47208	3.38977	2.78668	4.16016	56.2798	24.2681	4.1448	3.66457	-1.42706	2.75e-08
Solyc01g150148	0.246499	0.338584	0.231915	0.285602	3.64647	0.859487	1.05467	1.24631	-2.33672	0.000121271
Solyc01g150159	0.35725	0.378734	0.807318	0.102874	1.23684	0.41256	0.649015	0.759997	-1.77502	0.024762
Solyc01g150165	0.422531	0.366727	0.248755	0.371509	2.77751	0.608921	0.066913	0.0610997	-2.37659	4.82e-05
Solyc01g150170	0.156361	0.126986	0.030292	0.0512503	0.963423	0.260231	0.514101	0.702268	-1.99185	0.0290998
Solyc01g150172	0.110756	0.135964	0.057812	0.078828	0.457229	0.108591	0.262715	0.393831	-2.27468	0.00169166
Solyc02g005180	15.7251	9.39138	8.62768	4.7724	40.8019	15.0396	15.3859	14.9249	-1.70696	0.000386641
Solyc02g005320	1.25517	1.00273	1.0475	0.750735	2.71234	1.35157	2.51399	2.81512	-1.206	0.000284403
Solyc02g005490	0.0934463	0.098272	0.0668707	0.0516623	1.2498	0.220449	0.239057	0.347139	-2.6818	0.0408892
Solyc02g014220	0	0	0.0345467	0.0309947	0.253175	0.073475	0.0663223	0.0449013	-1.95992	0.0328852
Solyc02g014430	3.69173	3.47187	0.379435	0.537243	4.3536	1.49879	1.1013	1.13935	-1.74931	5.57e-06
Solyc02g014530	0.054913	0.0645923	0.10399	0.115922	1.49763	0.556318	0.204809	0.344712	-1.59698	0.0295004
Solyc02g014560	1.09492	1.53841	6.44626	1.58696	21.3256	2.166	0.825559	1.08837	-3.5402	1.05e-20
Solyc02g014740	0.303936	0.281757	2.34851	1.20704	0.600654	3.24515	7.50411	6.28755	2.22383	0.00100417
Solyc02g014750	0.679621	0.70287	7.10349	2.59393	0.450766	6.35054	20.3775	13.7765	3.56387	2.96e-10
Solyc02g020890	12.5837	7.51101	3.37454	2.69711	14.4956	6.35625	9.1648	9.92655	-1.42154	3.47e-08
Solyc02g021230	1.0677	1.28485	2.27044	1.25377	9.97103	4.6679	3.63291	4.02225	-1.3185	0.000123789
Solyc02g021260	0.00385133	0	0.263819	0.022664	0.00719267	0.148574	0.783977	1.07144	4.17991	0.00879955
Solyc02g022880	6.95001	7.24801	5.22308	4.26107	12.836	3.85685	4.54419	4.11639	-1.92679	1.48e-06
Solyc02g022900	4.07346	5.51715	0.659421	0.49945	1.95377	0.804801	1.6309	0.866147	-1.44772	0.0355896
Solyc02g023950	3.74317	3.39593	6.07169	6.8484	2.45601	5.99681	7.69277	9.24928	1.08053	5.79e-07
Solyc02g030120	8.12272	7.9912	14.4002	13.2304	4.61015	17.2505	23.9208	19.3933	1.67684	3.37e-08
Solyc02g030130	4.12981	3.92071	8.13239	6.86357	2.62449	10.3584	17.0015	16.6207	1.7751	1.88e-11
Solyc02g030190	0	0	0	0	0.993602	0	0	0	-6.30681	0.00424788
Solyc02g030225	7.2315	7.81309	10.8168	13.4601	2.82248	9.09415	9.91968	10.2506	1.49071	1.84e-08
Solyc02g030300	8.06245	9.65721	0.579241	1.29137	0.0813777	0.338107	0.405846	0.541005	1.85315	0.0272892
Solyc02g030460	1.86939	1.15806	4.29662	0.882133	0.0742677	11.1479	28.7027	26.5478	6.97754	1.03e-60
Solyc02g030480	8.82391	8.39762	3.37993	7.57282	2.68349	1.18776	0.895073	0.959354	-1.37618	0.000682338
Solyc02g031985	1.6247	1.53566	1.94009	0.941972	17.1414	3.84108	2.90349	3.25533	-2.3584	1.12e-08
Solyc02g031990	3.48759	3.2258	1.34688	2.31385	2.65998	0.810159	0.692941	0.555415	-1.92755	0.0159345
Solyc02g032100	2.16948	2.48616	6.38786	4.34611	24.8686	5.45622	3.81805	3.74538	-2.39548	4.61e-15
Solyc02g032210	0.144962	0.238234	0.410294	0.0940627	1.86283	0.710488	0.259584	0.140754	-1.67313	0.0268053
Solyc02g032270	0.0106453	0.0158423	0.653818	0.0107847	0.951514	0.206306	0.0493297	0.063876	-2.336	0.0104953
Solyc02g032650	2.88285	2.66249	0.882798	1.57573	0.123684	0.644017	1.04521	1.72063	2.12254	0.00343232
Solyc02g032820	0.049887	0.0964237	0.0914367	0.053314	1.55533	0.178013	0.051686	0.145153	-3.30146	1.3e-11
Solyc02g032870	4.76807	5.41887	8.26742	6.61877	4.507	10.9823	16.393	15.8356	1.06739	1.12e-07
Solyc02g032910	5.42359	5.30016	5891.79	30.6993	8438	2149.23	5.71267	20.131	-2.2136	0.0479958
Solyc02g032940	11.8483	13.8763	17.8591	21.557	124.357	23.0078	29.0368	25.8999	-2.67646	1.53e-21
Solyc02g033030	2.81907	4.23053	3.65769	5.63575	2.19018	7.86703	7.60252	9.51627	1.63443	4.27e-09
Solyc02g033090	0	0	4.71155	0	38.6315	3.38821	0	0	-3.70456	0.0496186
Solyc02g036350	305.438	476.543	500.743	1042.54	22.321	140.394	67.9663	181.235	2.43465	2.73e-30
Solyc02g036430	1.37474	1.68913	1.55111	2.4816	0.496865	1.21377	1.17147	1.75133	1.08239	0.018971
Solyc02g036440	0.0492253	0.058201	0.218308	0.060189	8.99335	0.688074	0.014792	0.023897	-3.93099	0.0322841
Solyc02g036460	7.26704	7.48998	10.9298	11.6268	3.98846	10.8764	12.9968	14.5786	1.24348	8.68e-10
Solyc02g037500	14.3191	19.1357	13.9261	22.2593	11.704	6.50756	5.2768	5.79963	-1.03682	0.017997
Solyc02g037530	29.7149	22.3201	56.1365	53.5702	7.80475	49.0643	101.066	110.943	2.46314	3.38e-21
Solyc02g037550	16.1441	3.75642	4.52671	9.03855	0.499126	2.24396	1.46317	2.08268	1.97865	0.000859209
Solyc02g037555	6.11049	5.25734	8.15033	8.85145	1.25826	4.5599	2.98367	3.5586	1.63718	0.00031347
Solyc02g037590	2.17569	1.2463	1.06776	0.884537	5.5186	2.96501	3.7655	5.06756	-1.09388	0.0342037
Solyc02g038670	0.0388857	0.0353173	0.149943	0.008688	1.16359	0.273567	0.105134	0.0572063	-2.24203	0.00367446
Solyc02g038690	36.3895	44.562	85.0456	84.2871	34.8588	84.3017	84.2597	66.148	1.05994	1.45e-14
Solyc02g038805	1.89758	1.71987	4.10336	6.82021	6.18536	2.98311	2.9828	2.00286	-1.26095	0.000108079
Solyc02g038806	4.77249	5.20284	5.92379	6.076	3.7522	12.0973	14.9369	14.8245	1.49853	4.07e-08
Solyc02g038820	0.171866	0.155582	0.205851	0.191563	2.70178	0.411496	0.35115	0.191768	-2.96817	0.000209294
Solyc02g043810	0.112809	0.158635	0.331093	0.126367	5.55302	0.661799	0.215881	0.270387	-3.2441	6.48e-13
Solyc02g061770	1.50554	2.27856	1.22758	2.43704	0.238488	262.42	294.043	454.417	9.82853	7.56e-277
Solyc02g061800	0.301813	0.33149	0.402442	0.283766	1.75067	0.447073	0.301243	0.361532	-2.16137	4.59e-05
Solyc02g061850	0.482298	0.738558	1.3833	0.997457	2.43619	0.916443	1.19588	1.42648	-1.61709	2.66e-15
Solyc02g061870	0.040129	0	1.12531	0	5.26172	0.856263	0	0.0244327	-2.7831	0.00143774
Solyc02g061910	0.407151	0.247559	0.286403	0.281811	2.47496	0.476489	0.376528	0.339192	-2.57443	0.000160226
Solyc02g062010	7.19181	7.96051	8.00129	10.0721	5.63056	13.4184	10.4404	9.99566	1.03588	0.0156224
Solyc02g062020	11.5624	8.75119	15.6118	11.3381	38.6959	19.4252	19.9313	15.3199	-1.18435	1.12e-05
Solyc02g062090	0.158952	0.117401	0.312634	0.0544113	1.40976	0.455688	0.225408	0.294507	-1.83386	0.0163404
Solyc02g062140	14.137	19.3765	7.19991	13.6759	2.09029	5.86655	3.00509	4.70499	1.29454	2.68e-05
Solyc02g062160	0.118152	0.295228	13.6097	0.615209	286.796	26.1123	10.2445	15.3227	-3.72394	0.00449221
Solyc02g062170	10.6872	12.3952	29.8467	18.9574	7.57011	30.2688	43.1998	39.9444	1.79052	2.2e-25
Solyc02g062210	0.0243017	0	1.21567	0	10.5237	1.77535	0	0	-2.77266	0.00106975
Solyc02g062220	0	0	0	0.0226437	1.2505	0.0753877	0.017659	0	-4.30094	0.0150204
Solyc02g062320	0.105527	0.201058	0.201964	0.106329	8.73732	1.14738	0.792899	0.598422	-3.14721	6.48e-06
Solyc02g062330	0.236322	0.345343	0.560221	0.396927	2.69729	1.02014	1.07654	1.42563	-1.58574	4.03e-05
Solyc02g062390	0.241605	0.690231	0.553083	0.712221	29.4879	5.97267	0.0781467	0.134345	-2.53056	2.47e-09
Solyc02g062410	0	0.0843917	3.99774	0.217981	45.9764	3.9825	0.316038	0.201243	-3.79569	0.00873352
Solyc02g062435	0	0.0293513	0	0	0.133652	0	0.0465753	0.0115757	-5.69768	0.0303602
Solyc02g062460	21.6531	11.3633	37.3473	24.1648	342.329	144.4	32.3079	37.5591	-1.46886	4.45e-10
Solyc02g062490	4.17172	1.74692	12.8809	8.92355	7.55564	4.30176	0.414726	0.348072	-1.02845	9.76e-07
Solyc02g062500	8.99625	10.0534	8.83261	9.7964	28.3859	7.93376	3.29731	4.21011	-2.0597	3.9e-11
Solyc02g062760	3.93007	3.97578	6.49418	8.07423	1.53115	4.37112	6.27629	6.02046	1.27075	0.00600887
Solyc02g062780	8.14442	6.65597	13.7349	10.5759	7.63242	17.8115	35.0546	36.4566	1.00931	6.14e-19
Solyc02g062790	0.189765	0.078003	0.192854	0.0642887	3.5147	0.347334	0.343791	0.297933	-3.5588	9.3e-10
Solyc02g062870	0.127783	0.337684	0	0.029732	18.0576	0.748031	0.118424	0.13319	-4.73996	0.0351562
Solyc02g062960	1.86171	3.77082	3.31413	18.5525	6.25428	29.6445	2.1097	10.1798	2.02347	5.46e-06
Solyc02g063010	38.4316	37.6457	41.2765	39.4506	17.015	64.3299	93.7918	109.989	1.71133	6.28e-34
Solyc02g063020	3.545	3.64837	2.63024	1.818	0.13625	2.14472	2.45521	1.92525	3.77504	1.83e-09
Solyc02g063030	45.2543	28.682	29.711	32.379	6.86307	19.7827	54.0717	55.2628	1.29891	7.04e-06
Solyc02g063120	0.68898	1.195	1.14333	0.733076	0.353911	2.71792	2.67504	2.36937	2.63035	0.00253645
Solyc02g063133	0	0	0.808987	0	9.86699	0.280875	0.135181	0.0452807	-5.38503	0.0382588
Solyc02g063170	11.1981	9.64829	49.4556	85.1256	143.632	67.586	20.9044	21.4378	-1.28459	8.48e-13
Solyc02g063200	0.0842417	0	0.125414	0.0873813	0.717407	0.12421	0.31862	0.149391	-2.71861	0.0296067
Solyc02g063250	0.726456	2.39463	0.329759	2.29188	0.312027	2.02345	0.405647	0.595304	2.51616	0.00838672
Solyc02g063260	0.466836	0.257953	0.907564	0.512667	3.69555	1.79366	2.68843	2.95143	-1.30452	0.0460058
Solyc02g063330	1.96472	2.42925	2.83439	3.24625	14.3712	5.72526	6.2388	8.62238	-1.54387	2.31e-29
Solyc02g063350	27.2499	25.6025	16.8457	13.0789	105.306	26.8468	7.26252	7.68803	-2.23148	0.0114158
Solyc02g063400	1.42306	0.93743	0.767309	0.608824	5.24161	1.10351	1.13214	0.631383	-2.43589	0.00424136
Solyc02g063450	26.0136	23.4288	28.5711	32.8322	480.927	44.9507	47.4225	67.6203	-3.68734	1.72e-20
Solyc02g063470	0	0	0.606507	0.0106637	2.00358	0.25377	0.0194293	0	-3.16389	0.00587406
Solyc02g063520	11.7814	11.4416	6.56512	12.3233	5.80694	3.17608	3.87954	4.76106	-1.08636	2.31e-06
Solyc02g064720	4.32002	2.74254	7.5671	7.29378	1.00702	3.85223	16.8477	19.3766	1.75427	7.32e-05
Solyc02g064760	0.530763	0.676596	0.18141	0.576555	0.0225343	0.661283	0.317963	0.299164	4.73328	0.0050417
Solyc02g064830	1.82015	0.352756	0.51113	0.249076	3.60784	0.9304	1.45653	0.75256	-2.14323	6.24e-05
Solyc02g064940	176.34	173.799	177.338	255.495	10.4613	34.291	26.0537	32.5165	1.51115	9.46e-08
Solyc02g064945	1.8392	1.40617	3.69945	3.43079	1.66577	0.436436	0.428977	0.311474	-2.10218	6.15e-06
Solyc02g064960	4.17765	4.71564	26.7502	30.6852	1.68457	10.9716	20.0383	16.7752	2.49377	5.78e-26
Solyc02g064980	14.4012	6.01317	4.01078	4.60208	8.73848	3.85526	3.54617	3.60115	-1.36725	0.000625964
Solyc02g064990	5.30295	5.96209	5.79474	7.54085	1.64294	4.04638	2.94748	4.43279	1.12038	0.0128137
Solyc02g065050	1.32223	0.653645	3.72623	2.22382	0.509456	5.49414	8.53322	8.99063	3.18975	1.36e-14
Solyc02g065230	1.88297	1.15149	0.0547563	0.0203847	1.22935	0.0589807	0.090197	0.0316707	-4.53934	4.56e-07
Solyc02g065250	1.05564	0.205419	0.415246	0.258925	0	0.414454	0.0544667	0.010187	6.6134	0.00158417
Solyc02g065280	40.5094	34.9479	6.94675	11.1553	15.4433	5.70259	0.54509	0.457333	-1.60909	0.00029937
Solyc02g065290	1.1028	1.53865	4.79848	3.35457	0.39566	3.52066	5.62347	5.09644	2.91292	1.26e-05
Solyc02g065340	0.0209093	0	0.0928503	0	0.344856	0	0	0.0385317	-7.07222	0.000381415
Solyc02g065410	1.36685	1.51138	1.94469	1.84898	9.71326	2.66928	3.32938	3.82096	-2.10972	1.87e-08
Solyc02g065480	0.275283	0.193395	2.25551	0.710389	0.670761	17.2444	16.785	21.5184	4.46047	7.07e-90
Solyc02g065490	0.598712	0.65199	5.00249	6.24702	10.6709	1.25274	0.094487	0.127081	-3.32385	1.16e-22
Solyc02g065570	70.3549	108.924	39.8725	83.0588	1.54464	48.2457	31.3559	54.6735	4.74186	1.13e-32
Solyc02g065600	0.407976	0.561548	0.059978	0.0996137	1.80931	0.264967	0.0757843	0.246894	-2.92282	2.23e-05
Solyc02g065670	0	0	2.01212	0.0746123	22.8946	4.6902	0.0143677	0.162875	-2.54679	0.032112
Solyc02g065700	8.11341	6.56775	4.55311	4.56708	2.38742	6.90403	8.35191	9.39479	1.30667	6.64e-09
Solyc02g065740	0.0595223	0.0148483	0.0771387	0.120811	0.362165	0	0.0112147	0.0525467	-7.68424	9.73e-05
Solyc02g066970	16.5556	17.0546	79.8092	77.8242	12.2537	111.255	74.189	71.2272	2.96122	9.79e-49
Solyc02g067150	0	0	0.0891477	0	20.5167	0.398555	0	0	-5.92512	1.12e-07
Solyc02g067200	1.17643	1.29364	1.20581	1.06712	8.68297	1.39553	1.75335	2.10662	-2.91222	7.31e-10
Solyc02g067220	0.180391	0.201645	0.17795	0.0139703	2.31967	0.255427	0.0432923	0.141059	-3.33896	2.84e-09
Solyc02g067230	1.3919	0.459747	2.08897	0.595557	5.44448	2.38984	3.66272	2.26854	-1.43108	5.56e-05
Solyc02g067250	10.415	12.641	6.87382	9.21985	20.6536	7.69816	4.24575	5.32193	-1.65441	3.45e-10
Solyc02g067350	0.282087	0.21694	0.0467383	0.011219	3.905	0.116341	0.0666487	0.208823	-5.32827	0.0015182
Solyc02g067490	0.516257	0.451433	0.583499	0.191716	10.5053	1.08087	0.15422	0.231148	-3.49054	2.75e-10
Solyc02g067510	0.165722	0.130755	0.249997	0.095913	3.24982	0.360347	0.144258	0.0566207	-3.3049	4.48e-05
Solyc02g067580	50.1719	63.0169	125.215	119.957	30.4559	115.687	150.832	129.623	1.70603	2.87e-28
Solyc02g067600	0.6268	0.376234	1.42077	0.0820463	6.07034	1.09763	0.0875537	0.120794	-2.6928	0.00757884
Solyc02g067655	3.18432	5.16037	2.01792	2.67636	2.87895	1.05674	1.56082	1.32785	-1.70546	0.043172
Solyc02g067680	5.80887	10.754	5.22609	7.24406	0.945003	3.50807	3.77473	6.02448	1.63563	0.00191851
Solyc02g067690	24.9915	46.0829	14.3271	19.2921	3.29193	24.0315	25.7252	46.0745	2.57566	3.64e-06
Solyc02g067740	6.7851	7.13955	7.50609	7.64235	27.7257	11.5268	11.1141	10.6022	-1.44693	7.16e-05
Solyc02g067790	0.14742	0.135338	0.090848	0.0858563	4.95548	1.101	0.679479	0.533839	-2.41052	1.84e-10
Solyc02g067800	9.86916	16.452	7.39113	17.2845	3.18359	7.66098	3.52386	4.20502	1.0424	0.00216929
Solyc02g067880	0	0	0.0115503	0	3.01489	0.394353	0.086603	0.0762447	-3.09494	0.00729055
Solyc02g067920	22.5414	21.2339	17.9852	19.6406	5.20458	19.243	17.4297	19.2782	1.67706	1.63e-31
Solyc02g068010	9.42382	11.5373	15.4791	12.9835	35.4634	19.8231	16.9519	19.7899	-1.07286	3.27e-06
Solyc02g068080	15.4389	12.5632	10.2411	11.7993	9.06758	5.01127	3.92896	4.70088	-1.0557	2.26e-05
Solyc02g068120	11.2712	9.01695	19.5466	19.1655	4.18258	16.1569	23.8193	19.8315	1.73242	4.96e-33
Solyc02g068190	0.25082	0.203175	0.476145	0.150869	4.92176	0.722355	0.262613	0.250011	-3.0107	5.62e-10
Solyc02g068195	0.0827623	0	0.0625113	0.0108057	1.52808	0.116524	0.0198837	0.00388	-3.85569	0.00153325
Solyc02g068300	5.58549	5.32876	6.06324	8.18021	0.558325	2.30696	4.64555	5.07621	1.81745	4.7e-10
Solyc02g068400	1.40466	1.64501	863.919	5.2726	1520.28	177.256	18.8473	21.2411	-3.35036	0.00434592
Solyc02g068415	0.0678947	0.029687	0.103473	0	0.60687	0.0640547	0.241094	0.190493	-3.29379	8.53e-06
Solyc02g068460	0.128618	0.117539	0	0.0633977	0.295791	0	0.015695	0	-6.31868	0.00619365
Solyc02g068510	0.0174813	0	0.486587	0.154507	0.080816	1.91286	1.63579	2.52595	4.25032	0.000138144
Solyc02g068530	22.225	20.2602	23.3399	27.4839	39.3358	22.9339	20.3053	20.851	-1.01249	3.26e-06
Solyc02g068600	4.64043	3.26722	7.44473	8.68137	2.33703	9.20709	11.9087	11.2983	1.80786	0.000134134
Solyc02g068610	1.53354	0.858995	4.93757	5.0115	1.10096	5.21985	5.73904	5.21035	2.07004	0.00465924
Solyc02g068615	0.931672	1.19163	2.56012	3.3488	0.240708	1.19123	0.696635	0.710974	2.04982	0.0226306
Solyc02g068760	24.1833	32.3765	5.72577	10.9015	1.17549	6.19701	6.02787	8.39827	2.24044	0.00152028
Solyc02g068793	0.0509907	0.056215	0.122273	0	3.72549	0	1.81076	0.288999	-10.3069	4.39e-15
Solyc02g069020	15.3821	16.3282	14.32	16.5753	4.18626	11.0806	10.356	9.06831	1.16573	0.0020358
Solyc02g069057	0	0	0	0	0.1616	0	0	0	-5.51994	0.0462735
Solyc02g069110	36.9773	43.9683	72.3133	62.5396	16.0746	71.7594	100.413	76.4761	1.98443	3.37e-07
Solyc02g069200	0.00962367	0	0.0122123	0	0.0664717	0.562255	1.27872	1.00049	2.85145	0.01723
Solyc02g069240	2.32459	1.53747	1.5824	1.58068	5.56915	2.55268	3.96753	4.3687	-1.37061	0.00548908
Solyc02g069250	7.62273	5.10805	3.57222	4.47571	11.3363	1.83563	2.84468	2.81242	-2.80136	6.59e-11
Solyc02g069270	0.235187	0.150131	0.420147	0.202795	0.375478	1.26275	2.39944	2.63782	1.53323	8.28e-08
Solyc02g069300	0.574299	0.207989	0.759045	0.325214	28.8213	3.77375	0.0297867	0	-3.11214	0.0170691
Solyc02g069390	0.559368	0.593587	1.8164	0.824126	0.995707	5.90109	11.1268	9.64096	2.35548	3.72e-13
Solyc02g069420	0.470259	0.392492	0.0564733	0.186201	0.19633	1.49636	0.93492	1.59365	2.71308	3.09e-08
Solyc02g069430	0.758874	0.613731	0.197723	0.344046	0.575845	3.132	1.48841	1.98513	2.20887	3.64e-13
Solyc02g069470	7.76419	9.1217	7.14977	6.70072	19.6015	10.5886	8.72522	9.50598	-1.09348	2.84e-07
Solyc02g069480	0	0	0	0	0	0.203741	0.359986	0.25609	6.5984	0.00547253
Solyc02g069550	0.090713	0.0941543	0.184056	0.00845333	0.503289	0.0917303	0.108006	0.130136	-2.70523	0.000404508
Solyc02g069560	4.1184	5.06628	6.04244	2.97894	1.71781	5.78075	11.8361	13.7894	1.54723	7.05e-11
Solyc02g069680	20.0057	19.1213	34.1512	26.6051	19.3815	49.7558	63.1837	54.2604	1.15627	3.05e-13
Solyc02g069690	3.88057	3.66826	12.4482	17.5777	2.08328	15.0622	10.61	11.4247	2.61397	2.8e-21
Solyc02g069740	0.516876	0.495567	0.709062	0.538104	5.03613	1.23789	0.898123	1.01561	-2.23781	9.35e-13
Solyc02g069760	0	0	0.040818	0	0.426073	0	0	0	-7.48028	0.00992313
Solyc02g069810	0.00976367	0.010198	1.09882	0.187584	29.8488	3.41643	6.00007	6.51627	-3.41525	1.37e-10
Solyc02g069910	127.371	151.609	105.046	124.265	17.2385	54.0891	53.4013	53.5857	1.42121	1.74e-07
Solyc02g069930	7.06718	6.94491	3.4683	6.57793	72.6807	4.72522	0.270673	0.508059	-4.20679	1.59e-20
Solyc02g070000	9.31591	9.66004	17.8478	13.3138	9.08029	23.1117	42.4018	44.7995	1.13874	1.04e-14
Solyc02g070040	56.7543	40.2518	33.607	34.4374	5.46951	13.8728	33.0254	27.0789	1.11051	3.02e-05
Solyc02g070110	0.00380867	0	0.024992	0	0.230503	0	0	0	-7.39686	4.28e-05
Solyc02g070140	0	0	0.164435	0.030153	4.80932	0.330416	0	0	-4.1012	0.000205279
Solyc02g070180	0.0829477	0.02457	0	0	1.86219	0.147761	0	0	-3.78143	0.00163925
Solyc02g070200	0	0	0	1.28726	56.783	3.93448	0	0	-4.12305	0.000164864
Solyc02g070270	0	0	0.106447	0.0526827	3.72608	0.821999	0	0.0295173	-2.41692	0.00830761
Solyc02g070530	7.85066	5.54889	4.55909	7.2219	0.166286	2.11949	5.18879	5.04029	3.43696	1.14e-15
Solyc02g070600	0.266032	0.132291	0.686734	0.154767	0.137343	1.43166	2.74352	2.82923	3.11891	1.24e-07
Solyc02g070620	0.375487	0.288088	2.77191	0.470901	0.508272	4.16373	11.7624	11.2495	2.81025	5.9e-15
Solyc02g070830	0	0.0161347	0.381566	0.028076	8.9386	0.836458	0	0	-3.69228	0.0060127
Solyc02g070890	3.93604	4.59666	2.40396	2.68088	6.64205	3.73793	4.58113	4.85741	-1.02271	2.74e-05
Solyc02g070950	827.362	603.14	138.891	107.524	48.0703	22.2005	59.7633	39.7597	-1.39357	0.00423624
Solyc02g070980	592.696	222.495	35.8345	19.26	14.9086	1.87445	6.14892	2.20268	-3.32376	0.00699769
Solyc02g070990	315.041	134.903	18.3551	8.37667	10.7528	2.49876	5.94126	2.804	-2.42765	0.00816488
Solyc02g071000	403.827	265.092	22.1084	26.3037	9.01102	3.42579	7.44505	5.56311	-1.68172	0.0069042
Solyc02g071040	6.87881	6.05667	4.0134	4.72484	12.3353	6.40694	7.81485	8.42125	-1.15669	4.2e-08
Solyc02g071050	0.236367	0.239199	4.48702	0.396995	41.7451	6.41291	1.00422	1.3422	-2.93582	0.00199619
Solyc02g071060	12.366	6.40451	22.8677	13.8075	201.134	24.7924	16.6778	14.0277	-3.27977	1.58e-18
Solyc02g071080	1.32437	1.51226	1.23702	2.03495	8.70176	0.814116	0.168709	0.440691	-3.63173	5.08e-18
Solyc02g071090	1.63504	1.19602	1.9553	1.29498	83.2982	4.53224	0.295409	0.889884	-4.4814	1.94e-08
Solyc02g071100	2.93645	3.13569	0.992977	1.91986	8.00638	3.46855	1.12213	1.32484	-1.45667	4.73e-05
Solyc02g071350	0.326291	0.295061	0.238666	0.0369783	5.19598	1.79407	0.881354	1.39312	-1.77556	0.00010583
Solyc02g071383	0	0	0	0	0.270654	0	0	0	-5.99382	0.02203
Solyc02g071387	0	0	0.0490427	0	0.458375	0.054973	0	0	-3.20184	0.00827947
Solyc02g071430	0.0539937	0.152673	0.155397	0.154393	0.151221	1.36314	1.34924	1.28962	3.04264	0.0163157
Solyc02g071480	0	0	0	0	0.392175	0.0234983	0.025275	0.0124617	-4.07072	0.0133723
Solyc02g071490	0.167399	0.102165	0.964204	1.05203	2.86267	1.32665	1.22664	0.841834	-1.30395	2.02e-05
Solyc02g071610	66.5777	55.298	154.192	202.639	46.1589	144.804	46.9951	61.1702	1.46582	2.31e-05
Solyc02g071620	34.8351	36.8241	26.3055	41.2848	2.47624	320.61	97.0167	166.971	6.84485	1.21e-53
Solyc02g071690	0.134118	0.0117857	0.039082	0.109128	0.385887	0.0572577	0.0133523	0.0740947	-2.90582	0.0340679
Solyc02g071700	104.654	47.0238	77.9558	42.6204	1.23424	11.5687	13.8359	10.9591	3.05753	1.31e-11
Solyc02g071720	12.4314	12.3924	9.01693	7.12713	1.50288	9.17703	13.2883	9.30078	2.40294	6.12e-15
Solyc02g071820	8.15152	16.8869	1.0961	1.64095	0.643654	3.12137	3.8731	7.93542	2.03385	4.12e-08
Solyc02g071880	3.63792	3.6574	3.84936	4.23077	1.98958	8.64639	13.2218	17.0908	1.91717	5.16e-16
Solyc02g071920	5.39516	6.11097	2.19642	4.23077	3.61989	8.83511	3.39223	5.99732	1.08713	0.00510936
Solyc02g071930	6.03196	7.87482	12.8665	9.08964	4.36973	14.4833	22.5364	20.0344	1.52105	3.83e-11
Solyc02g071950	0	0	8.80544	0.475814	40.148	5.30177	0	0	-3.17592	7.05e-07
Solyc02g071980	7.65714	7.70708	9.22988	9.84198	21.4845	9.74537	9.68162	11.1606	-1.38341	3.32e-07
Solyc02g072010	1.57962	1.68396	4.32655	4.13073	0.782723	3.1817	3.14801	3.97251	1.83033	0.00681192
Solyc02g072040	0.760414	0.947828	2.60939	3.33691	1.98168	6.77904	2.91738	3.61386	1.5428	5.84e-06
Solyc02g072050	0.337658	0.165876	1.20897	1.22432	0.374594	6.38409	5.62431	6.95051	3.84084	1.02e-25
Solyc02g072100	8.84508	8.73255	10.292	7.56974	22.7117	11.4307	6.22167	6.94763	-1.18002	0.00716214
Solyc02g072140	5.36083	5.48125	11.5689	7.85589	4.89583	16.0875	29.8727	30.6876	1.51959	7.6e-10
Solyc02g072190	0.930088	0.77542	0.267861	0.352704	1.40025	0.500585	0.0960777	0.239001	-1.68097	0.00319315
Solyc02g072240	3.22555	2.63773	4.08174	6.4604	6.66512	1.1733	1.08612	1.13776	-2.67779	5.27e-13
Solyc02g072280	0.00704767	0.008924	0	0.026667	0.06262	0.592859	0.276694	0.341956	3.00065	5.26e-05
Solyc02g072405	0.174711	0.0388897	0.655229	0.051795	3.08518	0.721698	0.409372	0.504132	-2.23726	0.00370073
Solyc02g072410	1.09517	0.264337	4.57985	0.690625	15.1599	5.53076	2.41674	2.31953	-1.64383	0.00306226
Solyc02g072423	0.12714	0.117947	1.48824	0.330227	5.87011	1.73161	0.12926	0.173011	-1.95061	0.0139233
Solyc02g072490	1.0797	1.0078	11.023	1.02172	39.4847	5.78123	0.471685	0.395549	-3.00893	0.0259907
Solyc02g072500	5.54981	4.81086	11.2418	5.80955	4.57236	15.0725	26.2248	25.9556	1.50376	3.85e-21
Solyc02g072520	8.71434	9.58953	5.6504	7.35654	19.2209	7.32566	5.77677	7.35454	-1.59326	1.11e-23
Solyc02g075620	10.0142	6.46927	12.3248	14.2902	1.11158	2.92591	2.80241	2.63501	1.18661	0.00178683
Solyc02g076670	1.81917	1.96709	0.66246	0.934164	0.210933	0.0173457	0	0	-3.81318	0.0321825
Solyc02g076680	7.94924	5.41277	10.1819	10.5992	4.88948	22.5854	20.0718	22.5052	2.00555	2.63e-17
Solyc02g076690	62.8816	109.859	39.1666	74.6832	8.55711	43.5291	52.6086	69.6748	2.17701	3.66e-08
Solyc02g076710	1.81308	1.32091	3.43529	1.88851	1.02978	3.12467	2.55913	1.91364	1.39217	0.000217154
Solyc02g076800	9.35254	14.9753	11.458	14.2032	1.11925	14.9404	21.2459	27.5717	3.53541	2.82e-25
Solyc02g076820	2.82697	2.79159	3.08706	1.22765	0	1.75252	10.044	10.7223	9.43585	3.48e-11
Solyc02g076860	0.173561	0.056347	0.370351	0.02711	0.273053	0.015498	0.062972	0	-4.22415	0.0344023
Solyc02g076910	0.0198057	0.0112107	0.0526593	0.0615213	6.73688	0.195505	0	0	-5.23471	1.72e-14
Solyc02g076920	0.00867567	0.0273543	0.0696017	0.04985	0.0673157	0.637081	0.296795	0.399641	3.08336	0.035376
Solyc02g076930	1.05896	1.26375	2.10072	0.970248	0.891038	4.53306	7.80619	8.75658	2.10462	4.27e-07
Solyc02g076940	0.186507	0.304401	0.604784	0.112102	13.2623	1.07766	0.44993	0.670361	-3.90931	0.0017046
Solyc02g077040	16.1736	18.5144	1.31232	2.25576	8.12488	1.19491	1.44559	1.62684	-2.97888	1.87e-26
Solyc02g077050	58.3237	58.1727	27.6397	33.3766	2.74219	9.95967	12.6052	13.2461	1.64823	7.93e-19
Solyc02g077130	0.558991	0.243082	0.38891	0.703687	16.0403	1.2993	0	0.086335	-3.86213	7.42e-09
Solyc02g077150	0	0.0256723	1.82913	1.19483	187.955	9.35484	0	0.029292	-4.57202	1.23e-21
Solyc02g077260	5.40963	5.21477	5.8039	7.67077	1.37514	3.23712	2.79142	3.04097	1.0271	0.00234619
Solyc02g077330	71.0146	77.4175	38.1285	80.8656	30.9254	117.066	37.7869	54.3596	1.75845	0.000428002
Solyc02g077350	0	0	0	0.042515	1.31814	0.106927	0	0	-3.76389	0.0309705
Solyc02g077380	0	0.031039	0.163459	0.0260607	5.35736	0.240401	0	0	-4.74246	1.69e-11
Solyc02g077390	0.284198	0.339723	9.51411	0.519314	0.12051	16.8309	59.4455	64.9442	6.92562	0.00555816
Solyc02g077480	432.111	527.404	1060.22	1010.14	435.158	1283	1291.41	1055.29	1.35742	3.79e-21
Solyc02g077520	0.009622	0.0122393	0.024258	0.0231717	0.592218	0.10772	0.127056	0.104873	-2.61382	0.000214533
Solyc02g077540	0.039415	0.0143353	0	0	1.51385	0.0457707	0	0.0139343	-5.18374	0.000670953
Solyc02g077640	2.99868	4.07494	3.23068	2.87844	22.0007	3.32907	3.58605	3.55942	-2.98822	1.05e-09
Solyc02g077700	17.3131	18.0727	15.04	18.7902	5.87593	18.4898	15.1198	17.2639	1.43747	8.07e-09
Solyc02g077720	6.01743	6.3812	5.46097	8.71037	27.7739	6.3303	0.631365	0.584972	-2.31888	2.15e-16
Solyc02g077750	20.202	20.9301	26.7082	37.0476	10.1638	27.5347	28.2565	30.6285	1.20124	0.000205832
Solyc02g077840	12.1223	11.7388	10.2359	6.45374	4.51928	22.9254	35.8909	33.89	2.12002	7.61e-10
Solyc02g077880	518.432	760.072	408.636	814.446	116.235	437.62	153.891	235.5	1.7056	4.05e-12
Solyc02g077920	18.0646	15.6997	8.50727	9.89893	2.10798	10.9011	14.9931	12.626	2.16195	3.4e-26
Solyc02g078040	82.1684	87.5549	358.47	165.598	17.6125	1241.19	1528.16	1347.39	5.92227	2.07e-248
Solyc02g078050	1.71015	0.381307	125.599	23.8687	1.35312	2283.5	6121.17	8098.12	10.4469	1.3e-50
Solyc02g078100	1.4142	0.62169	137.012	49.5826	1.51682	3053.76	5656.91	7318.22	10.7014	2.84e-60
Solyc02g078130	6.89366	7.8041	7.48259	7.44206	0.0521813	1.82768	4.49307	5.63264	4.9869	0.000256841
Solyc02g078330	2.62322	3.74246	838.495	8.32353	4348.86	297.828	8.34844	7.61561	-4.15338	0.00313621
Solyc02g078370	0.0240847	5.9683	235.163	104.374	18787.6	630.857	0.58011	0.165696	-5.18341	4.17e-07
Solyc02g078380	9.8738	11.4292	15.9048	20.6753	30.259	15.6455	9.67541	7.61291	-1.16583	4.42e-07
Solyc02g078400	6.66054	4.23391	9.22815	6.59424	59.3132	23.0062	18.2262	18.2089	-1.56522	1.6e-21
Solyc02g078470	6.03742	5.44255	5.72218	5.14792	11.6904	6.70979	4.62383	4.85749	-1.00602	9.45e-06
Solyc02g078530	0.886704	1.02116	0.502284	0.42281	1.17947	0.592789	0.846764	0.999918	-1.22769	0.0117955
Solyc02g078620	4.79369	3.19364	6.2738	8.94089	0.487298	2.34743	4.41401	6.49475	2.00399	0.00949479
Solyc02g078650	2.59563	5.09332	0.403654	2.23956	0.114238	0	0	0	-6.846	0.00141147
Solyc02g078720	9.81186	9.08214	15.8277	18.7023	2.26331	9.34395	12.7256	12.0399	1.83416	6.61e-15
Solyc02g078760	32.2878	34.7625	33.8405	43.9501	8.44646	30.4625	38.3452	45.5716	1.62673	9.84e-13
[truncated: 4,442 more rows]

## Sheet: Table S9
Table S9 Differentially expressed genes in WT-30 versus ms-30 in carpels
[truncated: 133 more rows]

[truncated: 3 more sheets: Table S10, Table S11, Table 12]
